# Supplementary material for: Photoredox-catalyzed cascade [2 + 2 + 1] cyclization of 1,6-enynes with thiols
Source: Royal Society of Chemistry journal article supplement (doi:10.1039/d4qo00460d), 2024-01-01
Supplement: d4qo00460d1.pdf [file d4qo00460d1.pdf]

# Supporting Information

## Photoredox-catalyzed cascade [2+2+1] cyclization of 1,6-enynes with thiols

Zhe Meng,<sup>[a]</sup> Min Shi\*<sup>[a,b]</sup> and Yin Wei\*<sup>[a]</sup>

<sup>a</sup> State Key Laboratory of Organometallic Chemistry, Center for Excellence in Molecular Synthesis, University of Chinese Academy of Sciences, Shanghai Institute of Organic Chemistry, Chinese Academy of Sciences, 345 Lingling Road, Shanghai 200032, P. R. China, <sup>b</sup> Key Laboratory for Advanced Materials and Institute of Fine Chemicals, Key Laboratory for Advanced Materials and Feringa Nobel Prize Scientist Joint Research Center, School of Chemistry & Molecular Engineering, East China University of Science and Technology, Meilong Road No.130, Shanghai, 200237 (China). weiyin@sioc.ac.cn, mshi@mail.sioc.ac.cn

### Table of Contents

|     |                                                                   |      |
|-----|-------------------------------------------------------------------|------|
| 1.  | General remarks.....                                              | S2   |
| 2.  | General procedures for the synthesis of substrates <b>1</b> ..... | S3   |
| 3.  | Optimization of reaction conditions .....                         | S8   |
| 4.  | General procedure for the synthesis of <b>3</b> .....             | S12  |
| 5.  | Mechanistic studies.....                                          | S13  |
| 6.  | Gram scale reaction .....                                         | S17  |
| 7.  | Transformation of product <b>3a</b> .....                         | S18  |
| 8.  | Spectroscopic data of substrates <b>1</b> .....                   | S19  |
| 9.  | Spectroscopic data of products <b>3, 4, 5</b> .....               | S65  |
| 10. | Computational studies .....                                       | S124 |
| 11. | X-Ray structures.....                                             | S135 |
| 12. | References .....                                                  | S136 |

## 1. General remarks

$^1\text{H}$ ,  $^{13}\text{C}$  and  $^{19}\text{F}$  NMR spectra were recorded at 400 MHz or 600 MHz, 100 MHz or 150 MHz and 376 MHz or 564 MHz, respectively. HRMS spectra were recorded by EI, ESI, FI method. Infrared spectra were recorded on a Perkin-Elmer PE-983 spectrometer with absorption in  $\text{cm}^{-1}$ . Mass spectra were recorded by EI, ESI, and HRMS was measured on an Agilent Technologies 6224 TOF LC/MS instrument and a Waters Micromass GCT Premier. Melting points were determined on a digital melting point apparatus and temperatures were uncorrected. X-ray structure was determined on a Bruker Smart-1000 X-ray Diffraction meter. The employed solvents were dried up by standard methods when necessary. Commercially obtained reagents were used without further purification. All reactions were monitored by TLC plate analysis with silica gel coated plates (Huanghai GF254). Flash column chromatography was performed by using 300-400 mesh silica gel eluting with ethyl acetate and petroleum ether at increased pressure. Substrates **1ab** and **1ad** contain trace of impurity.

## 2. General procedures for the synthesis of substrates 1

### Synthesis of substrates 1

#### Step 1

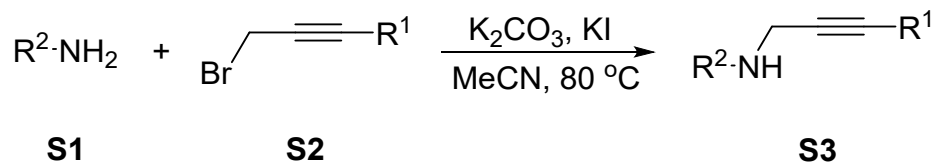

To a solution of **S1** (60 mmol) in MeCN (100 mL) was added  $\text{K}_2\text{CO}_3$  (90 mmol), KI (6.0 mmol) and **S2** (90 mmol) and the resulting solution was allowed to stir at 80 °C for 12 h. After filtration, the organic phase was concentrated under reduced pressure and the residue was purified by a flash column chromatography on silica gel to give the desired products **S3** (PE:EA = 4:1).

#### Step 2

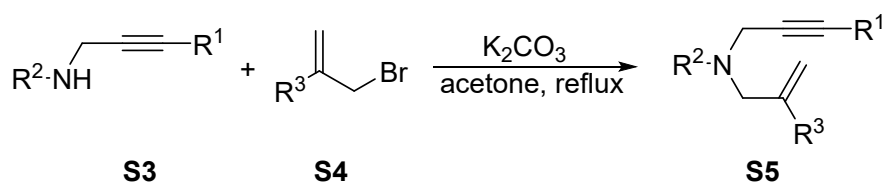

To a solution of **S3** (50 mmol) in acetone (100 mL) was added  $\text{K}_2\text{CO}_3$  (1.5 equiv.) and **S4** (1.5 equiv.) and the resulting solution was allowed to stir at 70 °C for 12 h. After filtration, the organic phase was concentrated under reduced pressure and the residue was purified by a flash column chromatography on silica gel to give the desired products **S5** (PE:EA = 10:1).

### Synthesis of substrate 1ab<sup>[1]</sup>

#### Step 1

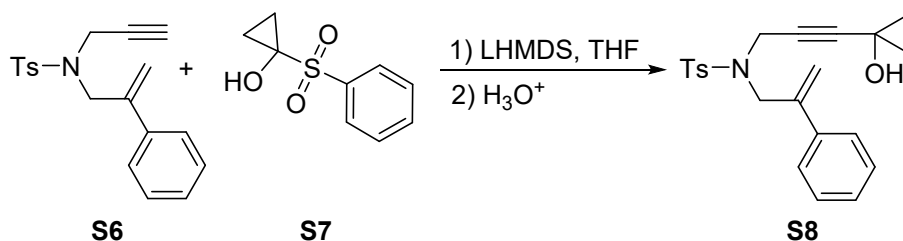

To a solution of compounds **S6** (20 mmol) in THF (30 mL) was slowly added LHMDS (24 mmol, 1.0 M in THF) at -78 °C under the protection of argon and the resulting solution was allowed to stir

at -78 °C for 30 min before a solution of **S7** (10 mmol) in THF (10 mL) was added into the above mixture. Consequently, the reaction mixture was allowed to warm up to room temperature and the mixture was left standing overnight. Then, saturated NH<sub>4</sub>Cl solution was added to quench the reaction. Extracted with ethyl acetate, dried over anhydrous Na<sub>2</sub>SO<sub>4</sub>, and filtered, the organic phase was concentrated under reduce pressure and the residue was purified by a flash column chromatography on silica gel to give the desired product **S8** (PE:EA = 4:1~2:1).

## Step 2

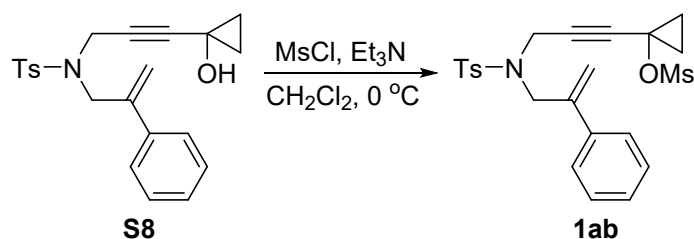

To a solution of **S8** (5.0 mmol) and anhydrous Et<sub>3</sub>N (2.0 equiv.) in CH<sub>2</sub>Cl<sub>2</sub> (20 mL) was added MsCl (2.0 equiv.) at 0 °C under the protection of argon and the resulting solution was allowed to stir at 0 °C for 1.0 h before some amounts of water were added to quench the reaction. Extracted with CH<sub>2</sub>Cl<sub>2</sub> (20 mL × 3), dried over anhydrous Na<sub>2</sub>SO<sub>4</sub>, and filtered, the organic phase was concentrated under reduce pressure and the residue purified by a flash column chromatography on silica gel to give the desired product **1ab** (PE:EA = 2:1).

## Synthesis of substrate 1ac

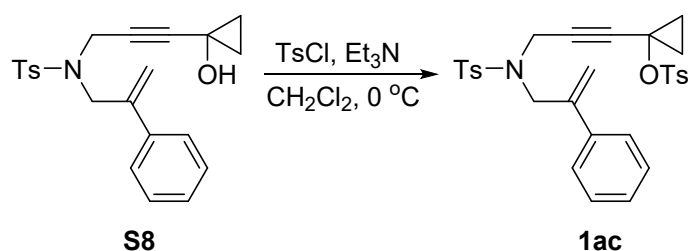

To a solution of **S8** (5.0 mmol) and anhydrous Et<sub>3</sub>N (2.0 equiv.) in CH<sub>2</sub>Cl<sub>2</sub> (20 mL) was added TsCl (2.0 equiv.) at 0 °C under the protection of argon and the resulting solution was allowed to stir at 0 °C for 1.0 h before some amounts of water were added to quench the reaction. Extracted with CH<sub>2</sub>Cl<sub>2</sub> (20 mL × 3), dried over anhydrous Na<sub>2</sub>SO<sub>4</sub>, and filtered, the organic phase was concentrated under reduce pressure and the residue purified by a flash column chromatography on silica gel to give the desired product **1ac** (PE:EA = 2:1).

## Synthesis of substrate 1ad

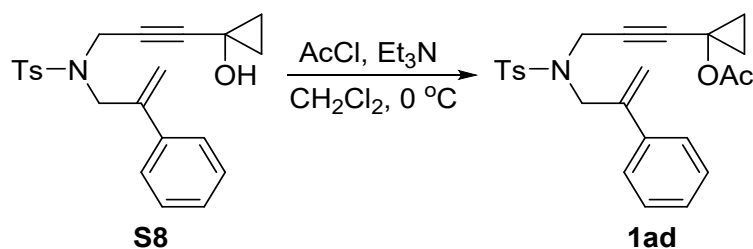

To a solution of **S8** (5.0 mmol) and anhydrous Et<sub>3</sub>N (2.0 equiv.) in CH<sub>2</sub>Cl<sub>2</sub> (20 mL) was added AcCl (2.0 equiv.) at 0 °C under the protection of argon and the resulting solution was allowed to stir at 0 °C for 1.0 h before some amounts of water were added to quench the reaction. Extracted with CH<sub>2</sub>Cl<sub>2</sub> (20 mL × 3), dried over anhydrous Na<sub>2</sub>SO<sub>4</sub>, and filtered, the organic phase was concentrated under reduce pressure and the residue purified by a flash column chromatography on silica gel to give the desired product **1ad** (PE:EA = 2:1).

## Synthesis of substrate 1z.

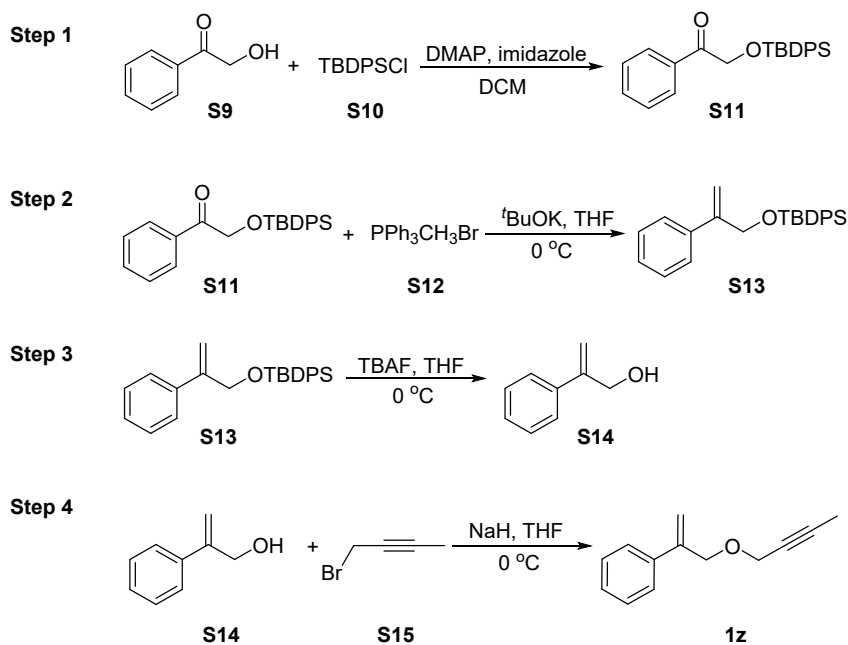

**Step 1:** To a flame dried 100 mL flask was added **S9** (10.0 mmol), DMAP (0.6 equiv.), imidazole (1.1 equiv.) and the solvent DCM (30.0 mL) under the protection of argon and then, the flask was cooled to 0 °C before **S10** (11.0 mmol) was added dropwise into the flask under argon. The reaction mixture was stirred at ambient temperature for 12 h before water was added to quench the reaction.

Extracted with EA, dried over anhydrous Na<sub>2</sub>SO<sub>4</sub>, and filtered, the organic phase was concentrated under reduce pressure and the residue was purified by a flash column chromatography on silica gel to give the desired product **S11** (PE:EA = 10:1).

**Step 2:** To a flame dried 100 mL flask was added <sup>t</sup>BuOK (11.0mmol), **S12** (10.0 mmol) and the solvent THF (30 mL) under the protection of argon and then, the reaction mixture was stirred at 0 °C for 30 min. The solution of **S11** (10.0 mmol) in THF was added slowly and the reaction mixture was warmed to room temperature overnight before water was added to quench the reaction. Extracted with EA, dried over anhydrous Na<sub>2</sub>SO<sub>4</sub>, and filtered, the organic phase was concentrated under reduce pressure and the residue was purified by a flash column chromatography on silica gel to give the desired product **S13** (PE:EA = 20:1).

**Step 3:** To a flame dried 50 mL flask was added **S13** (5.0 mmol), and the solvent THF (15 mL) under the protection of argon and then, the flask was cooled to 0 °C before the solution of TBAF (1.0 M, 10.0 mL) was added dropwise into the flask. The resulting solution was allowed to stir at 0 °C for 8.0 h before water was added to quench the reaction. Extracted with EA, dried over anhydrous Na<sub>2</sub>SO<sub>4</sub>, and filtered, the organic phase was concentrated under reduce pressure and the residue was purified by a flash column chromatography on silica gel to give the desired products **S14** (PE:EA = 4:1).

**Step 4:** To a flame dried 50 mL flask was added NaH (60% dispersion in mineral oil, 3.0 mmol, 2.0 equiv.), and the solvent THF (10 mL) under the protection of argon and then, the flask was cooled to 0 °C before the solution of **S14** (1.5 mmol) in THF was added dropwise into the flask. The reaction mixture was stirred at 0 °C for 30 min. The **S15** (3.0 mmol, 2.0 equiv.) was added slowly and the reaction was heated to room temperature overnight before water was added to quench the reaction. Extracted with EA, dried over anhydrous Na<sub>2</sub>SO<sub>4</sub>, and filtered, the organic phase was concentrated under reduce pressure and the residue was purified by a flash column chromatography on silica gel to give the desired product **1z** (PE:EA = 50:1).

## Unsuccessful substrates

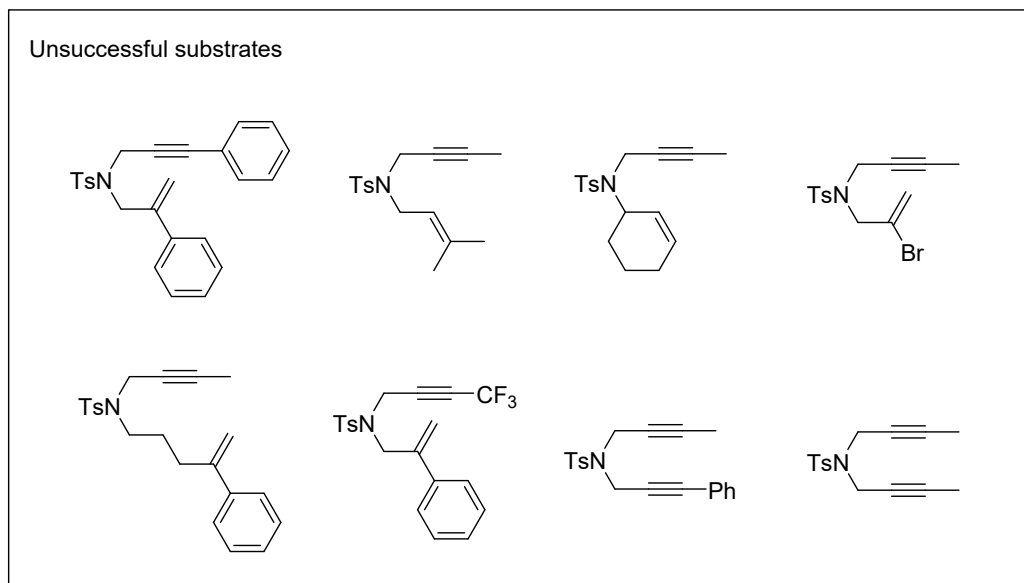

**Figure S1.** Unsuccessful substrates.

### 3. Optimization of reaction conditions

**Table S1.** Optimization of reaction conditions using **1a** as a template substrate.<sup>a</sup>

Reaction scheme showing the synthesis of **3a** from **1a** and **2a**. **1a** (0.01 mmol) reacts with **2a** (2.0 equiv.) in the presence of  $K_2CO_3$  (2.0 equiv.),  $[Ir(dFCF_3ppy)_2(dtbbpy)]PF_6$  (3.0 mol%), and *p*-toluenethiol (0.2 equiv.) in DCE (5 mL) under 30 W blue LED irradiation for 12 h to yield **3a**.

| entry <sup>a</sup> | variation from the standard condition                                     | <b>3a</b> , yield <sup>b</sup> [%] |
|--------------------|---------------------------------------------------------------------------|------------------------------------|
| 1                  | none                                                                      | 95                                 |
| 2                  | <i>fac</i> -Ir(ppy) <sub>3</sub> as PC                                    | 15                                 |
| 3                  | Ir(dtbbpy)ppy <sub>2</sub> as PC                                          | 50                                 |
| 4                  | Cs <sub>2</sub> CO <sub>3</sub> instead of K <sub>2</sub> CO <sub>3</sub> | 72                                 |
| 5                  | NEt <sub>3</sub> instead of K <sub>2</sub> CO <sub>3</sub>                | 0                                  |
| 6                  | Na <sub>2</sub> CO <sub>3</sub> instead of K <sub>2</sub> CO <sub>3</sub> | 77                                 |
| 7                  | DCM instead of DCE                                                        | 58                                 |
| 8                  | MeCN instead of DCE                                                       | 60                                 |
| 9                  | 1.0 mL DCE instead of 5.0 mL DCE                                          | 59                                 |
| 10                 | Without base                                                              | 40                                 |
| 11                 | Without <i>p</i> -MePhSH                                                  | 67                                 |
| 12                 | Without light or PC                                                       | 0                                  |

<sup>a</sup> Reaction was carried out with **1a** (0.1 mmol), **2a** (2.0 equiv.),  $K_2CO_3$  (2.0 equiv.), *p*-toluenethiol (0.2 equiv.),  $[Ir(dFCF_3ppy)_2(dtbbpy)]PF_6$  (3.0 mol%) in DCE (5.0 mL) at ambient temperature using 30 W blue LEDs irradiation. <sup>b</sup> <sup>1</sup>H NMR yield using dimethyl terephthalate as an internal standard.



**Table S2.** Optimization of reaction conditions using **1ab** as a template substrate (PC).<sup>a</sup>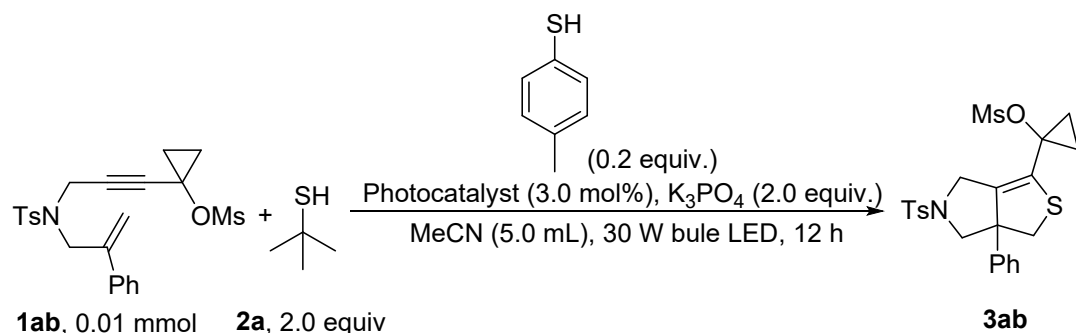

| entry <sup>a</sup> | Photocatalyst                                                                | <b>3ab</b> , yield <sup>b</sup> [%] |
|--------------------|------------------------------------------------------------------------------|-------------------------------------|
| 1                  | [Ir(dFCF <sub>3</sub> ppy) <sub>2</sub> dtbpy]PF <sub>6</sub>                | 65                                  |
| 2                  | [Ir(dFCF <sub>3</sub> ppy) <sub>2</sub> dCF <sub>3</sub> bpy]PF <sub>6</sub> | NR                                  |
| 3                  | <b>PC1</b>                                                                   | NR                                  |
| 4                  | Eosin Y                                                                      | 55                                  |
| 5                  | <b>PC2</b>                                                                   | NR                                  |
| 6                  | <b>PC3</b>                                                                   | NR                                  |
| 7                  | Ru(bpy) <sub>3</sub>                                                         | 32                                  |
| 8                  | Ir(ppy) <sub>3</sub>                                                         | NR                                  |
| 9                  | Ir[(dtbpy)ppy <sub>2</sub> ]PF <sub>6</sub>                                  | 60                                  |
| 10                 | 4CzIPN                                                                       | 63                                  |

<sup>a</sup> Reaction was carried out with **1ab** (0.1 mmol), **2a** (2.0 equiv.), K<sub>3</sub>PO<sub>4</sub> (2.0 equiv.), *p*-toluenethiol (0.2 equiv.), photocatalyst (3.0 mol%) in MeCN (5.0 mL) at ambient temperature using 30 W blue LEDs irradiation. <sup>b</sup> <sup>1</sup>H NMR yield using dimethyl terephthalate as an internal standard.

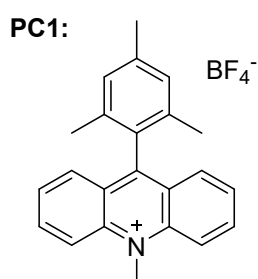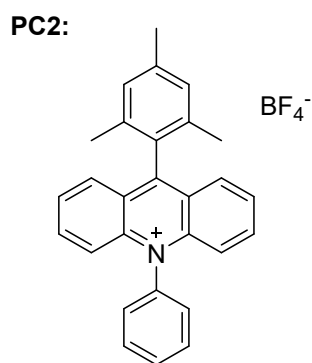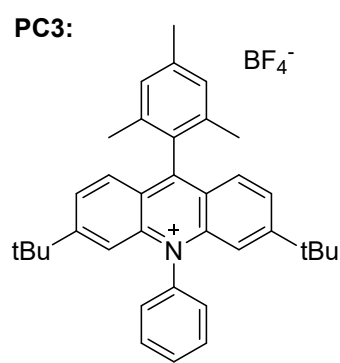

**Table S3.** Optimization of reaction conditions using **1ab** as a template substrate (solvent).<sup>a</sup>

**1ab**, 0.01 mmol    **2a**, 2.0 equiv.    **3ab**

| entry <sup>a</sup> | solvent | <b>3ab</b> , yield <sup>b</sup> [%] |
|--------------------|---------|-------------------------------------|
| 1                  | DCM     | 64                                  |
| 2                  | DMF     | NR                                  |
| 3                  | DCE     | 70                                  |
| 4                  | DMA     | NR                                  |
| 5                  | MeOH    | 58                                  |
| 6                  | MeCN    | 65                                  |

<sup>a</sup> Reaction was carried out with **1ab** (0.1 mmol), **2a** (2.0 equiv.), K<sub>3</sub>PO<sub>4</sub> (2.0 equiv.), *p*-toluenethiol (0.2 equiv.), [Ir(dFCF<sub>3</sub>ppy)<sub>2</sub>dtbpy]PF<sub>6</sub> (3.0 mol%) in solvent (5.0 mL) at ambient temperature using 30 W blue LEDs irradiation. <sup>b</sup> <sup>1</sup>H NMR yield using dimethyl terephthalate as an internal standard.

**Table S4.** Optimization of reaction conditions using **1ab** as a template substrate (base).<sup>a</sup>

**1ab**, 0.01 mmol    **2a**, 2.0 equiv.    **3ab**

| entry <sup>a</sup> | base                            | <b>3ab</b> , yield <sup>b</sup> [%] |
|--------------------|---------------------------------|-------------------------------------|
| 1                  | K <sub>2</sub> CO <sub>3</sub>  | 82                                  |
| 2                  | Na <sub>2</sub> CO <sub>3</sub> | 73                                  |
| 3                  | Cs <sub>2</sub> CO <sub>3</sub> | 79                                  |
| 4                  | K <sub>3</sub> PO <sub>4</sub>  | 70                                  |
| 5                  | KH <sub>2</sub> PO <sub>4</sub> | 56                                  |
| 6                  | NEt <sub>3</sub>                | complex                             |

<sup>a</sup> Reaction was carried out with **1ab** (0.1 mmol), **2a** (2.0 equiv.), base (2.0 equiv.), *p*-toluenethiol (0.2 equiv.), [Ir(dFCF<sub>3</sub>ppy)<sub>2</sub>dtbpy]PF<sub>6</sub> (3.0 mol%) in DCE (5.0 mL) at ambient temperature using 30 W blue LEDs irradiation. <sup>b</sup> <sup>1</sup>H NMR yield using dimethyl terephthalate as an internal standard.

**Table S5.** Optimization of reaction conditions using **1ab** as a template substrate (control experiment).<sup>a</sup>

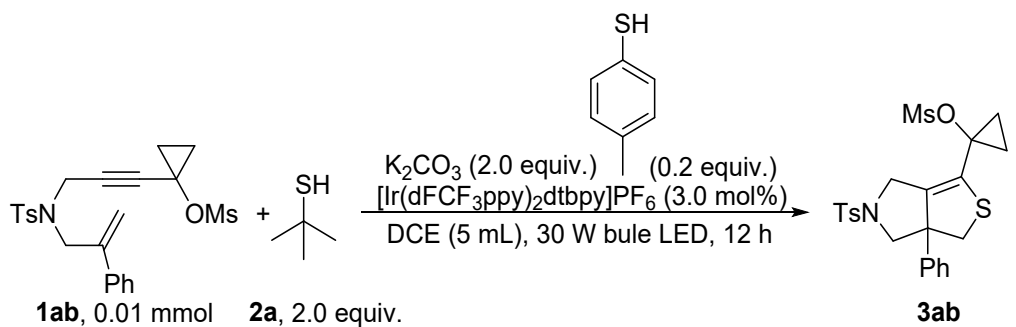

| entry <sup>a</sup> | variation from standard condition | <b>3ab</b> , yield <sup>b</sup> [%] |
|--------------------|-----------------------------------|-------------------------------------|
| 1                  | No $\text{K}_2\text{CO}_3$        | 41                                  |
| 2                  | No <i>p</i> -MePhSH               | 70                                  |
| 3                  | No light/No PC                    | NR                                  |

<sup>a</sup> Reaction was carried out with **1ab** (0.1 mmol), **2a** (2.0 equiv.),  $\text{K}_2\text{CO}_3$  (2.0 equiv.), *p*-toluenethiol (0.2 equiv.),  $[\text{Ir}(\text{dFCF}_3\text{ppy})_2\text{dtbpy}]\text{PF}_6$  (3.0 mol%) in DCE (5.0 mL) at ambient temperature using 30 W blue LEDs irradiation. <sup>b</sup> <sup>1</sup>H NMR yield using dimethyl terephthalate as an internal standard.

#### 4. General procedure for the synthesis of **3**

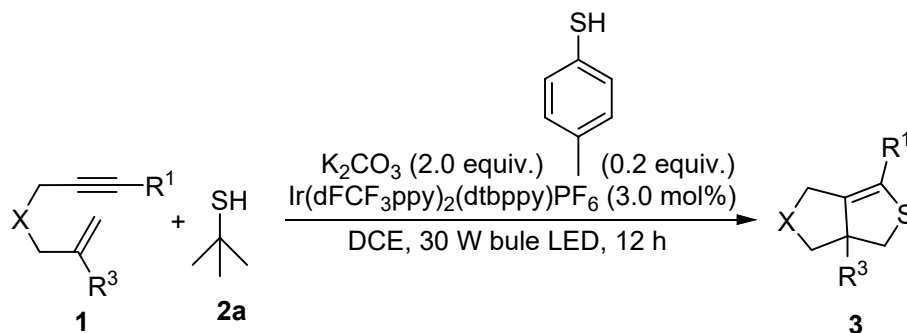

Substrates **1** (0.1 mmol, 1.0 equiv.),  $K_2CO_3$  (2.0 equiv.), *p*-toluenethiol (0.2 equiv.) and  $[Ir(dFCF_3ppy)_2(dtbbpy)]PF_6$  (3.0 mol%) were added in a flame dried 15 mL Schlenk tube. The reaction tube was placed under vacuum and backfilled with argon three times. Then, DCE (5.0 mL) and **2a** (2.0 equiv.) were added in the Schlenk tube via a syringe. Next, the tube was placed 5.0 cm away from blue LEDs (30 W), and stirred vigorously under the irradiation of blue light for 12 h. After completion, the solvent was removed under reduced pressure. The crude product residue was purified by a column chromatography on silica gel (PE/EA = 10/1 to 4/1) to afford the purified product **3**.

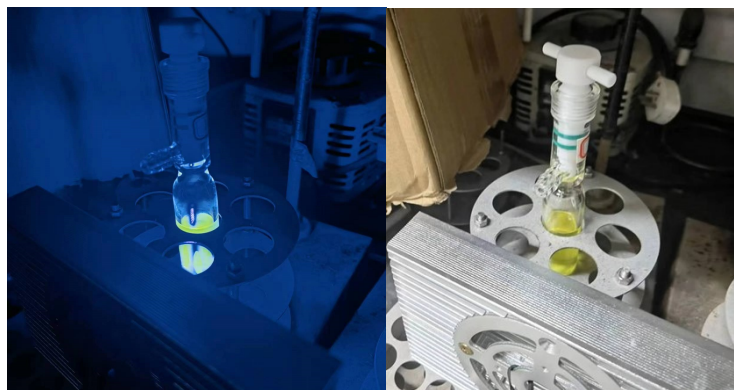

## 5. Mechanistic studies

### (a) Luminescence quenching experiments (Stern-Volmer Studies).<sup>[2]</sup>

Emission intensities were recorded using Varian Cary Eclipse spectrometer for all experiments. All Ir[(dFCF<sub>3</sub>ppy)<sub>2</sub>(dtbpy)]PF<sub>6</sub> solutions were excited at 380 nm and the emission intensity was collected at 540 nm. Solutions of different concentration of **1a** and **2a** were prepared and introduced to a 1.0 cm path length quartz cuvette equipped with a Teflon® septum. In a typical experiment, to a 1\*10<sup>-6</sup> M solution of photocatalyst in DCE was added the appropriate amount of **1a** in a screw-top quartz cuvette under Ar atmosphere and the emission of the sample was collected. Subsequently, to a 1\*10<sup>-6</sup> M solution of photocatalyst in DCE was added the appropriate amount of **2a** in screw-top quartz cuvette under Ar atmosphere and the emission of the sample was collected

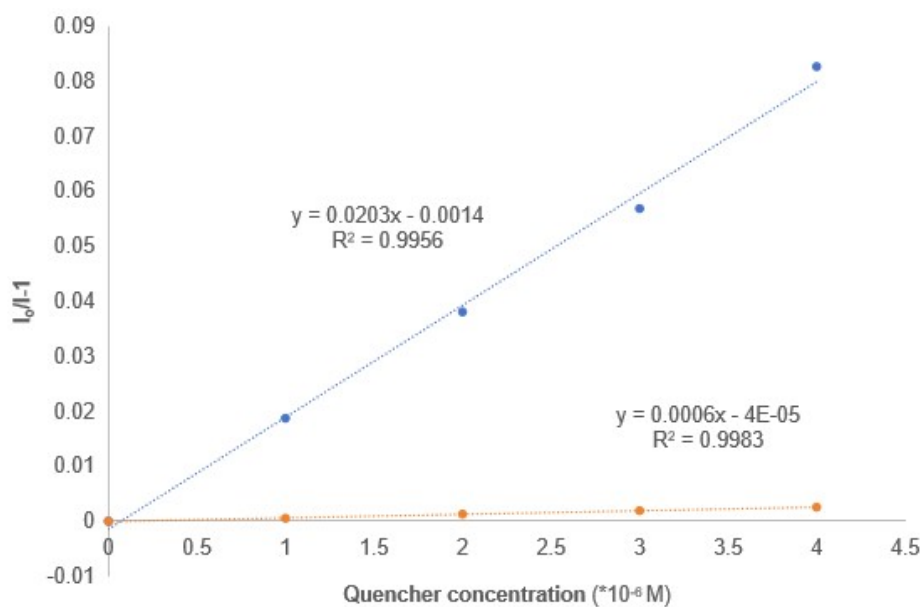

**Figure S2.** Stern-Volmer plot for the quenching studies above.

**(b) Light on/off experiment and quantum yield.**<sup>[2]</sup>

To study the necessity of continuous irradiation with visible light for the progress of the reaction, the reaction proceeding was monitored by <sup>1</sup>H NMR spectroscopy using dimethyl terephthalate as an internal standard before and after light irradiation and dark periods.

The control experiments shown below with successive intervals of irradiation and dark periods did result in interruption of the reaction progress in the absence of light, demonstrating that light is a necessary component for the reaction after triggering the reaction in the first part.

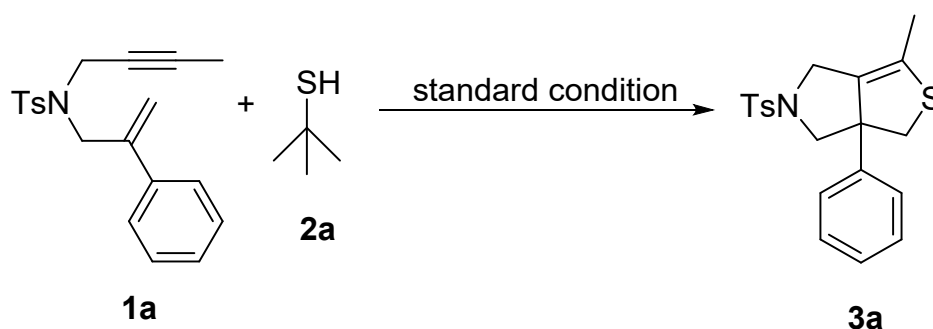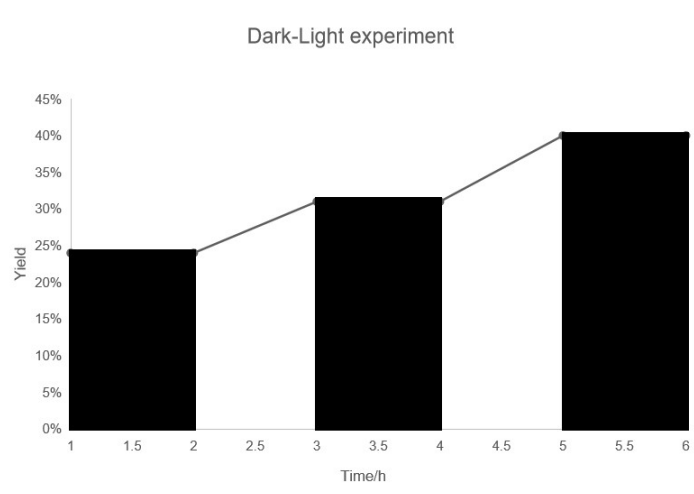

**Figure S3.** Light on-off experiment.

To further investigate whether the chain process is involved upon light irradiation, we measured the quantum yield of the template reaction of 1.0 h.

$$\phi = \frac{n_x}{n_p} = \frac{n_x}{\frac{\Delta E \times S \times t}{N_A h \nu}} = \frac{n_x \times N_A \times h \times c}{\Delta E \times S \times t \times \lambda}$$

$$= \frac{0.045 \times 10^{-3} \text{ mol} \times 6.022 \times 10^{23} \times 6.626 \times 10^{-34} \text{ J}\cdot\text{s} \times 2.998 \times 10^8 \text{ m}\cdot\text{s}^{-1}}{(14.0 \times 10^{-3} \text{ W}\cdot\text{cm}^2 \times 2 \times 3600 \text{ s} \times 415 \times 10^{-9} \text{ m})}$$

$$= 0.13$$

$n_x$  is the amount of photochemical or photophysical events  $x$  occurred during irradiation,  $n_p$  is the number of photons absorbed by the reactant.  $E$  is the radiant power.  $S$  is the irradiated area: 2 cm<sup>2</sup>;  $t$  is the irradiated time: 3600 s;  $N_A$  is the Avogadro constant:  $6.022 \times 10^{23}$ /mol;  $h$  is the Planck constant:  $6.626 \times 10^{-34}$  J·s;  $\nu$  is the frequency of incident light;  $c$  is velocity of light  $2.998 \times 10^8$  m/s).  $\lambda$  is the wavelength: 415 nm;  $n_x$  was analyzed by <sup>1</sup>H NMR,  $\Delta E$  was measured by ILT1400 Portable Radiometer/Photometer.

Substrate **1a** (0.04 mmol, 1.0 equiv.), K<sub>2</sub>CO<sub>3</sub> (2.0 equiv.), *p*-toluenethiol (0.2 equiv.) and Ir(dFCF<sub>3</sub>ppy)<sub>2</sub>(dtbpy)PF<sub>6</sub> (3.0 mol%) were added in a cuvette equipped with a magnetic stir bar. The reaction cuvette was placed under vacuum and backfilled with argon three times. Then, DCE (5.0 mL) and **2a** (2.0 equiv.) were added in the Schlenk tube via a syringe. Next, the tube was placed 5.0 cm away from blue LEDs (30 W), and stirred vigorously under the irradiation of blue light for 1.0 h. The reaction mixture was concentrated in *vacuo* and analyzed by <sup>1</sup>H NMR spectrum using dimethyl terephthalate as an internal standard. The quantum yield is calculated to be 0.13.

### (c) Radical trapping experiments.<sup>[3]</sup>

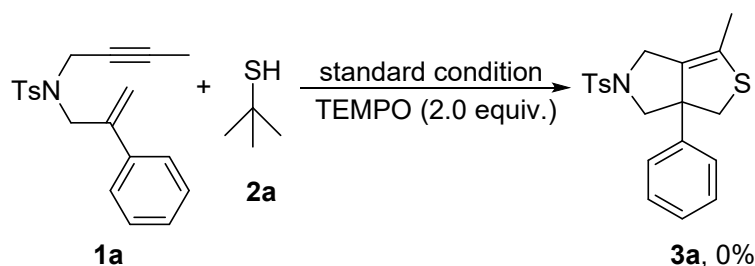

Substrate **1a** (0.1 mmol, 1.0 equiv.),  $\text{K}_2\text{CO}_3$  (2.0 equiv.), *p*-toluenethiol (0.2 equiv.), TEMPO (2.0 equiv.) and  $\text{Ir}(\text{dFCF}_3\text{ppy})_2(\text{dtbpy})\text{PF}_6$  (3.0 mol%) were added in a flame dried 15 mL Schlenk tube. The reaction tube was placed under vacuum and backfilled with argon three times. Then, **2a** (2.0 equiv.) and DCE (5.0 mL) were added in the Schlenk tube via a syringe. Next, the tube was placed 5.0 cm away from blue LEDs (30 W), and stirred vigorously under the irradiation of blue light for 12 h. When the reaction finished up, the mixture was concentrated in vacuo. The yield of product **3a** was determined by  $^1\text{H}$  NMR spectroscopy using dimethyl terephthalate as an internal standard. However, the TEMPO-trapped adduct can not be characterized by HRMS spectrometry.

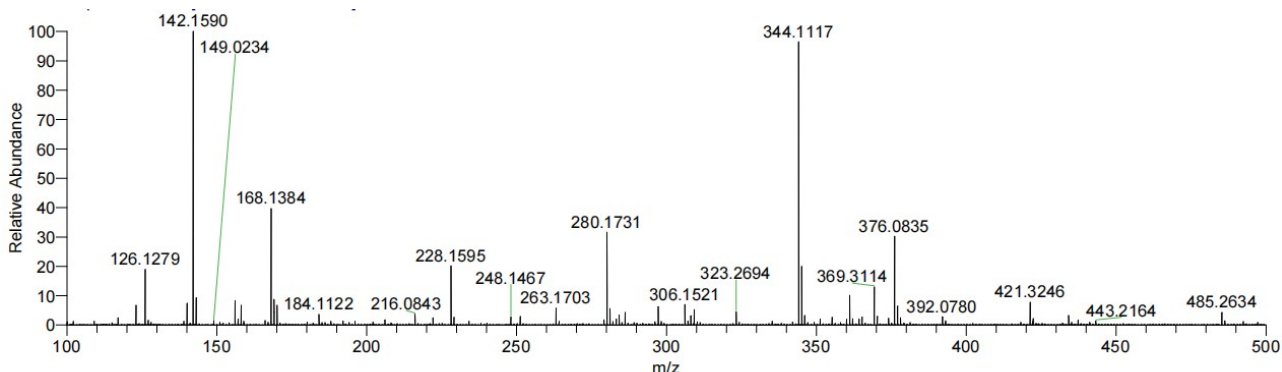

### (d) Control experiments.

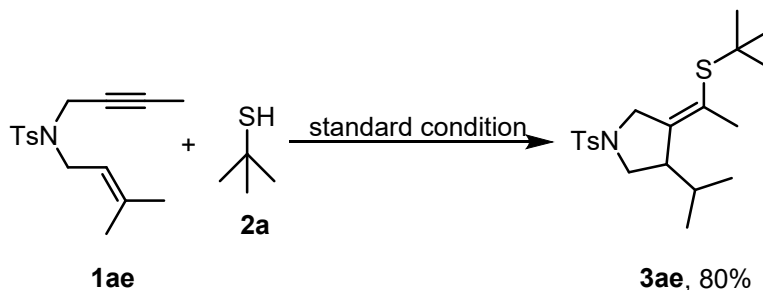



Substrate **1ae** (0.1 mmol, 1.0 equiv.), K<sub>2</sub>CO<sub>3</sub> (2.0 equiv.), *p*-toluenethiol (0.2 equiv.), and Ir(dFCF<sub>3</sub>ppy)<sub>2</sub>(dtbpy)PF<sub>6</sub> (3.0 mol%) were added in a flame dried 15 mL Schlenk tube. The reaction tube was placed under vacuum and backfilled with argon three times. Then, **2a** (2.0 equiv.) and DCE (5.0 mL) were added in the Schlenk tube via a syringe. Next, the tube was placed 5.0 cm away from blue LEDs (30 W), and stirred vigorously under the irradiation of blue light for 12 h. When the reaction finished up, the mixture was concentrated in vacuo. The yield of product **3ae** was determined by <sup>1</sup>H NMR spectroscopy using dimethyl terephthalate as an internal standard.

## 6. Gram scale reaction

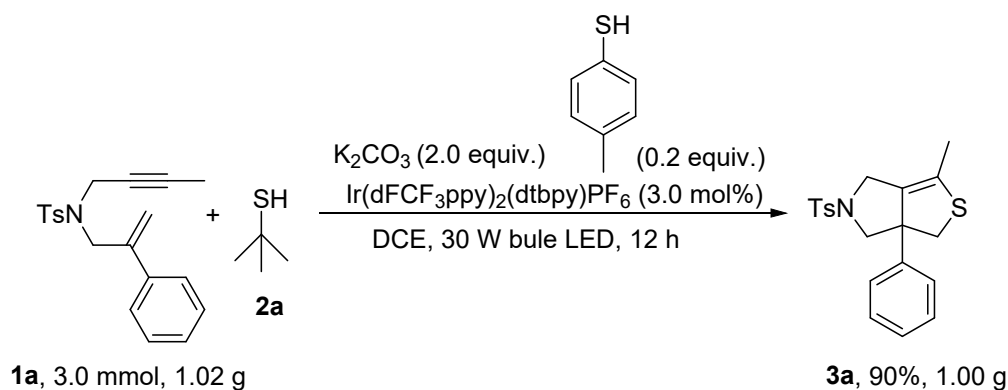

Substrate **1a** (3.0 mmol, 1.0 equiv.),  $K_2CO_3$  (2.0 equiv.), *p*-toluenethiol (0.2 equiv.) and  $Ir(dFCF_3ppy)_2(dtbbpy)PF_6$  (3.0 mol%) were added in a flame dried 50 mL Schlenk tube. The reaction tube was placed under vacuum and backfilled with argon three times. Then, **2a** (2.0 equiv.) and DCE (30.0 mL) was added in the Schlenk flask via a syringe. Next, the tube was placed 5.0 cm away from blue LEDs (30 W), and stirred vigorously under the irradiation of blue light for 12 h. After completion, the solvent was removed under reduced pressure. The crude product residue was purified by a column chromatography on silica gel (PE/EA = 10/1) to afford the purified product **3a** in 90% yield (1.00 g).

## 7. Transformation of product **3a**.<sup>[3]</sup>

### A. Oxidation reaction

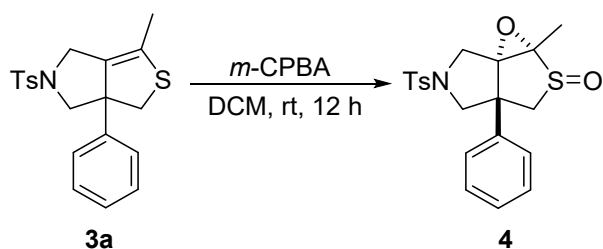

To a flask was added substrate **3a** (0.1 mmol, 1.0 equiv.), 3-chloroperoxybenzoic acid (0.5 mmol, 5.0 equiv.), and DCM (10 mL). After the reaction mixture was stirred at room temperature for 12 hours, the resulting mixture was filtered with a pad of celite. The filtrate was concentrated and the residue was purified with a silica gel column chromatography (PE/EA = 4/1) to give product **6** as a colorless oil (93% yield).

### B. Hydrogenative reduction reaction

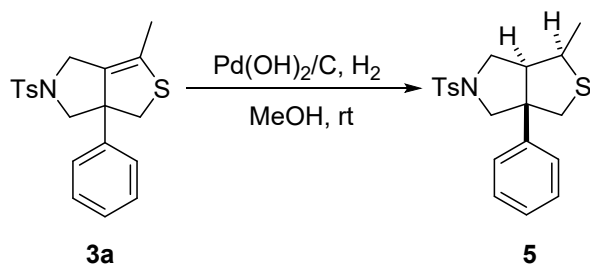

To a flask was added substrate **3a** (0.1 mmol, 1.0 equiv), Pd(OH)<sub>2</sub>/C (16 mg) and MeOH (8.0 mL). After the reaction mixture was stirred at room temperature for 12 hours under 1.0 atm H<sub>2</sub>, the resulting mixture was filtered with a pad of celite. The filtrate was concentrated under reduced pressure and the residue was purified with a silica gel column chromatography (PE/EA = 4/1) to give product **5** as a colorless oil (70% yield).

## 8. Spectroscopic data of substrates 1

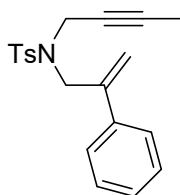

### *N*-(but-2-yn-1-yl)-4-methyl-*N*-(2-phenylallyl)benzenesulfonamide (**1a**)

This is a known compound and its spectroscopic data are consistent with those reported in the previous literature,<sup>[4]</sup> 83% yield, 390.0 mg. <sup>1</sup>H NMR (300 MHz, CDCl<sub>3</sub>, TMS) δ 7.76 (d, *J* = 8.4 Hz, 2H), 7.52 (dd, *J* = 8.4, 1.8 Hz, 2H), 7.38-7.29 (m, 5H), 5.56 (s, 1H), 5.33 (s, 1H), 4.23 (s, 2H), 3.93 (q, *J* = 2.1 Hz, 2H), 2.44 (s, 3 H), 1.51 (t, *J* = 2.4 Hz, 3H). <sup>13</sup>C NMR (75.5 MHz CDCl<sub>3</sub>, TMS) δ 143.4, 141.7, 138.0, 136.0, 129.3, 128.5, 128.2, 126.5, 117.0, 82.0, 71.5, 50.1, 36.2, 21.6, 3.3.

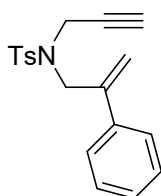

### 4-methyl-*N*-(2-phenylallyl)-*N*-(prop-2-yn-1-yl)benzenesulfonamide (**1b**)

This is a known compound and its spectroscopic data are consistent with those reported in the previous literature,<sup>[5]</sup> 87% yield, 375.0 mg. <sup>1</sup>H NMR (600 MHz, CDCl<sub>3</sub>, TMS) δ 7.75 (d, *J* = 8.2 Hz, 2H), 7.53 (d, *J* = 7.3 Hz, 2H), 7.35 (t, *J* = 7.3 Hz, 2H), 7.33 – 7.29 (m, 3H), 5.59 (s, 1H), 5.36 (s, 1H), 4.28 (s, 2H), 4.00 (d, *J* = 2.3 Hz, 2H), 2.44 (s, 3H), 1.99 (t, *J* = 2.3 Hz, 1H). <sup>13</sup>C NMR (151 MHz, CDCl<sub>3</sub>, TMS) δ 143.7, 141.3, 137.7, 135.6, 129.5, 128.5, 128.2, 128.0, 126.4, 117.3, 76.2, 74.2, 50.0, 35.6, 21.6

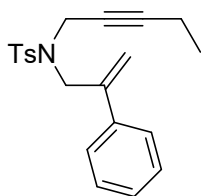

#### 4-methyl-N-(pent-2-yn-1-yl)-N-(2-phenylallyl)benzenesulfonamide (1c)

A colorless oil, 48% yield, 239.0 mg.  $^1\text{H}$  NMR ( $\text{CDCl}_3$ , TMS, 400 MHz)  $\delta$  7.69 (d,  $J = 8.3$  Hz, 2H), 7.54 – 7.39 (m, 2H), 7.30 – 7.20 (m, 5H), 5.49 (s, 1H), 5.26 (s, 1H), 4.16 (s, 2H), 3.88 (s, 2H), 2.36 (s, 3H), 1.81 (q,  $J = 7.5$  Hz, 2H), 0.81 (t,  $J = 7.5$  Hz, 3H).  $^{13}\text{C}$  NMR ( $\text{CDCl}_3$ , TMS, 100 MHz)  $\delta$  143.3, 141.5, 137.9, 135.9, 129.3, 128.4, 128.12, 128.08, 126.4, 116.9, 87.9, 71.4, 49.9, 36.1, 21.5, 13.5, 12.1. IR (Acetone)  $\nu$  762, 1093, 1160, 1348, 2203, 2953  $\text{cm}^{-1}$ . HRMS (ESI) calcd. for  $\text{C}_{21}\text{H}_{24}\text{O}_2\text{NS}$  (M+H): 354.1522, Found: 354.1509.

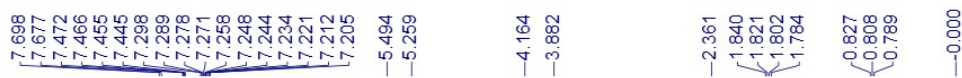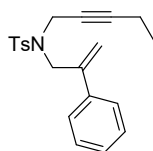

$^1\text{H}$  NMR ( $\text{CDCl}_3$ , 400 MHz, TMS)

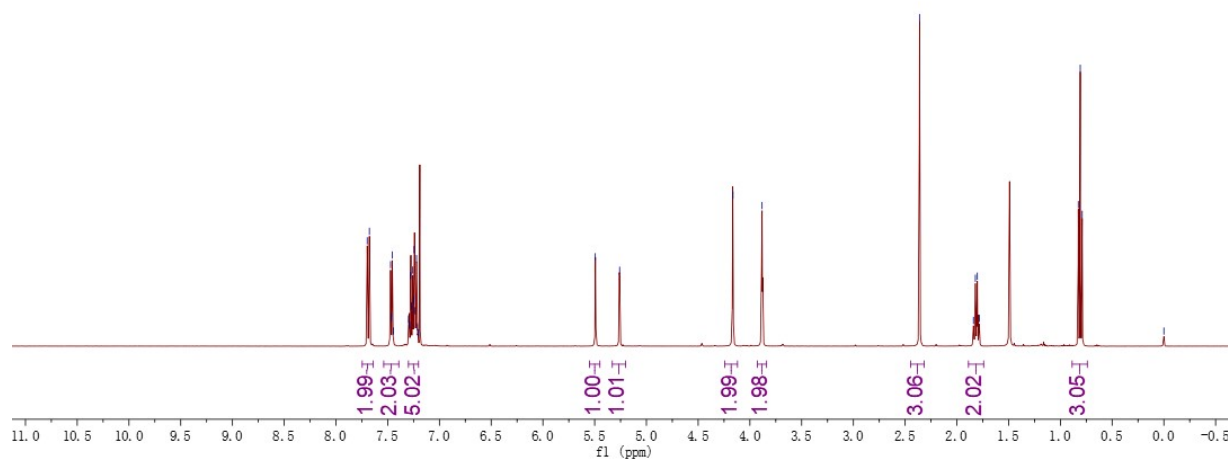

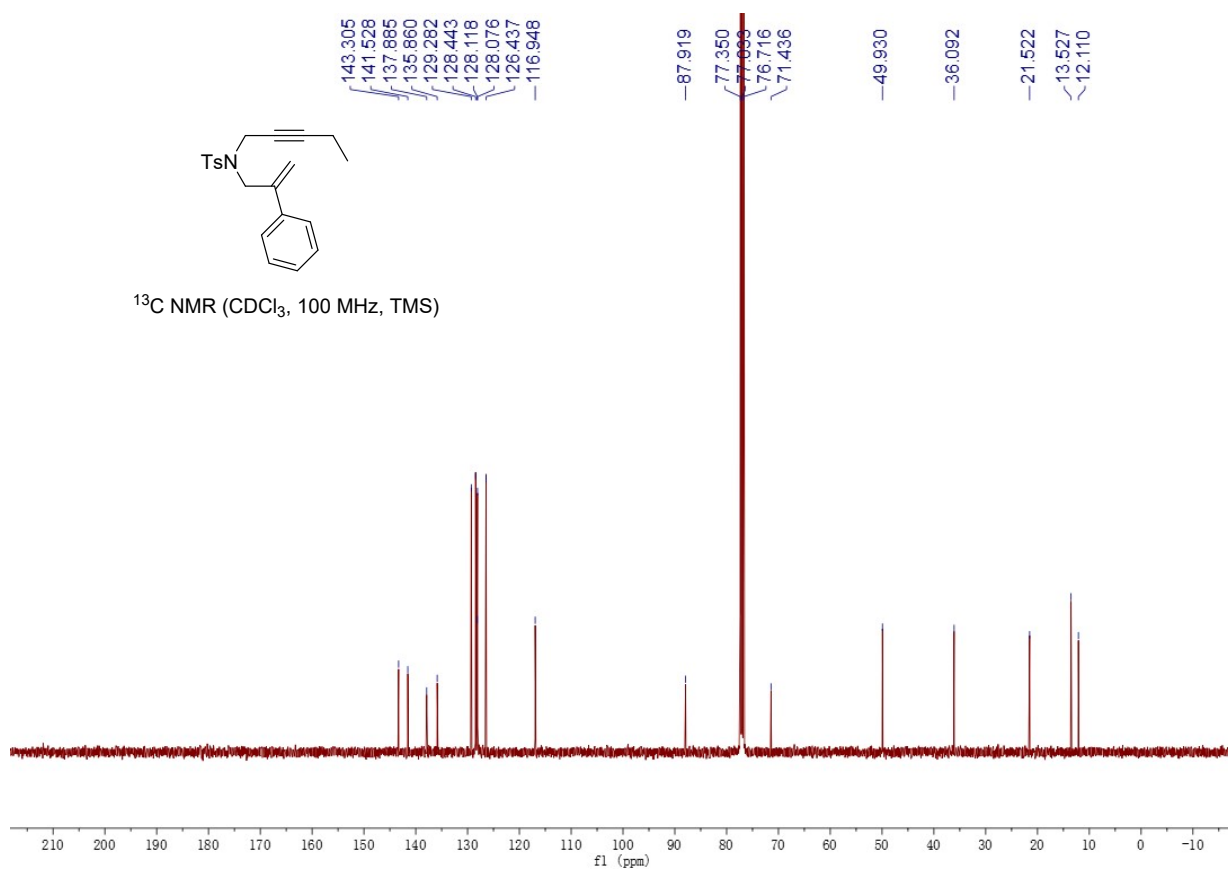

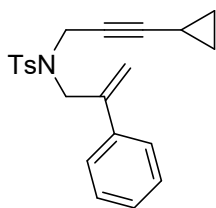

***N*-(3-cyclopropylprop-2-yn-1-yl)-4-methyl-*N*-(2-phenylallyl)benzenesulfonamide (1d)**

This is a known compound and its spectroscopic data are consistent with those reported in the previous literature,<sup>[6]</sup> 70% yield, 260.0 mg. <sup>1</sup>H NMR (300 MHz, CDCl<sub>3</sub>, TMS) δ 7.74 (d, *J* = 8.1 Hz, 2H), 7.53 (d, *J* = 6.8 Hz, 2H), 7.25 – 7.37 (m, 5H), 5.56 (s, 1H), 5.32 (s, 1H), 4.22 (s, 2H), 3.93 (s, 2H), 2.45 (s, 3H), 0.89 – 0.95 (m, 1H), 0.57 – 0.63 (m, 2H), 0.25 – 0.30 (m, 2H). <sup>13</sup>C NMR (75.5 MHz, CDCl<sub>3</sub>, TMS) δ 187.8, 142.8, 142.7, 139.2, 137.4, 129.4, 128.2, 127.7, 127.3, 126.5, 115.8, 108.0, 79.7, 50.6, 48.8, 38.2, 32.1, 26.3, 26.2, 21.4, 6.9.

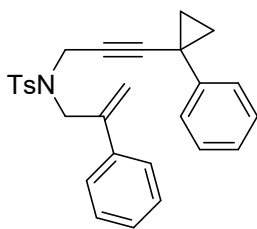

**4-methyl-N-(2-phenylallyl)-N-(3-(1-phenylcyclopropyl)prop-2-yn-1-yl)benzenesulfonamide (1e)**

A colorless oil, 60% yield, 285.6 mg.  $^1\text{H}$  NMR ( $\text{CDCl}_3$ , TMS, 400 MHz)  $\delta$  7.75 (d,  $J = 8.3$  Hz, 2H), 7.58-7.49 (m, 2H), 7.37 – 7.28 (m, 3H), 7.26 – 7.15 (m, 5H), 7.11-7.05 (m, 2H), 5.56 (s, 1H), 5.30 (s, 1H), 4.26 (s, 2H), 4.04 (s, 2H), 2.35 (s, 3H), 1.12 – 0.98 (m, 4H).  $^{13}\text{C}$  NMR ( $\text{CDCl}_3$ , TMS, 100 MHz)  $\delta$  143.5, 141.5, 141.3, 137.8, 135.8, 134.5, 129.5, 128.5, 128.3, 128.2, 127.9, 126.4, 126.1, 125.4, 117.0, 99.0, 90.4, 70.1, 50.0, 36.1, 21.5, 19.7, 15.4. IR (Acetone)  $\nu$  659, 1092, 1161, 1348, 1491, 2987  $\text{cm}^{-1}$ . HRMS (ESI) calcd. for  $\text{C}_{28}\text{H}_{28}\text{O}_2\text{NS}$  ( $\text{M}+\text{H}$ ): 442.1835, Found: 442.1823.

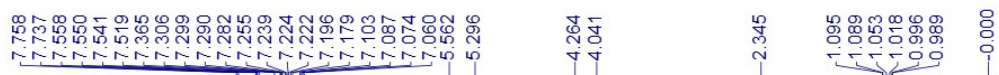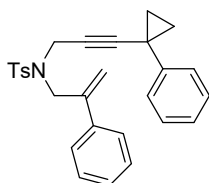

$^1\text{H}$  NMR ( $\text{CDCl}_3$ , 400 MHz, TMS)

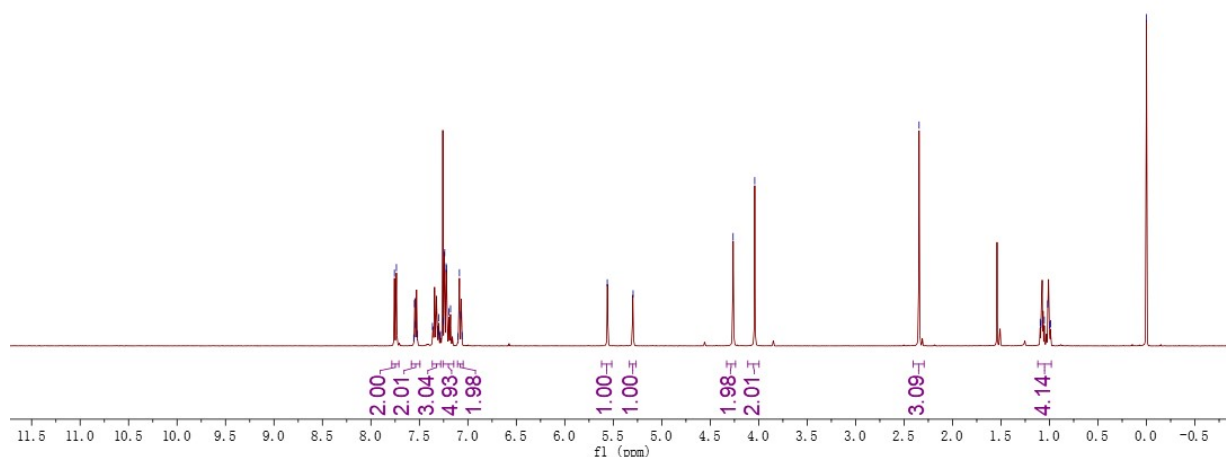



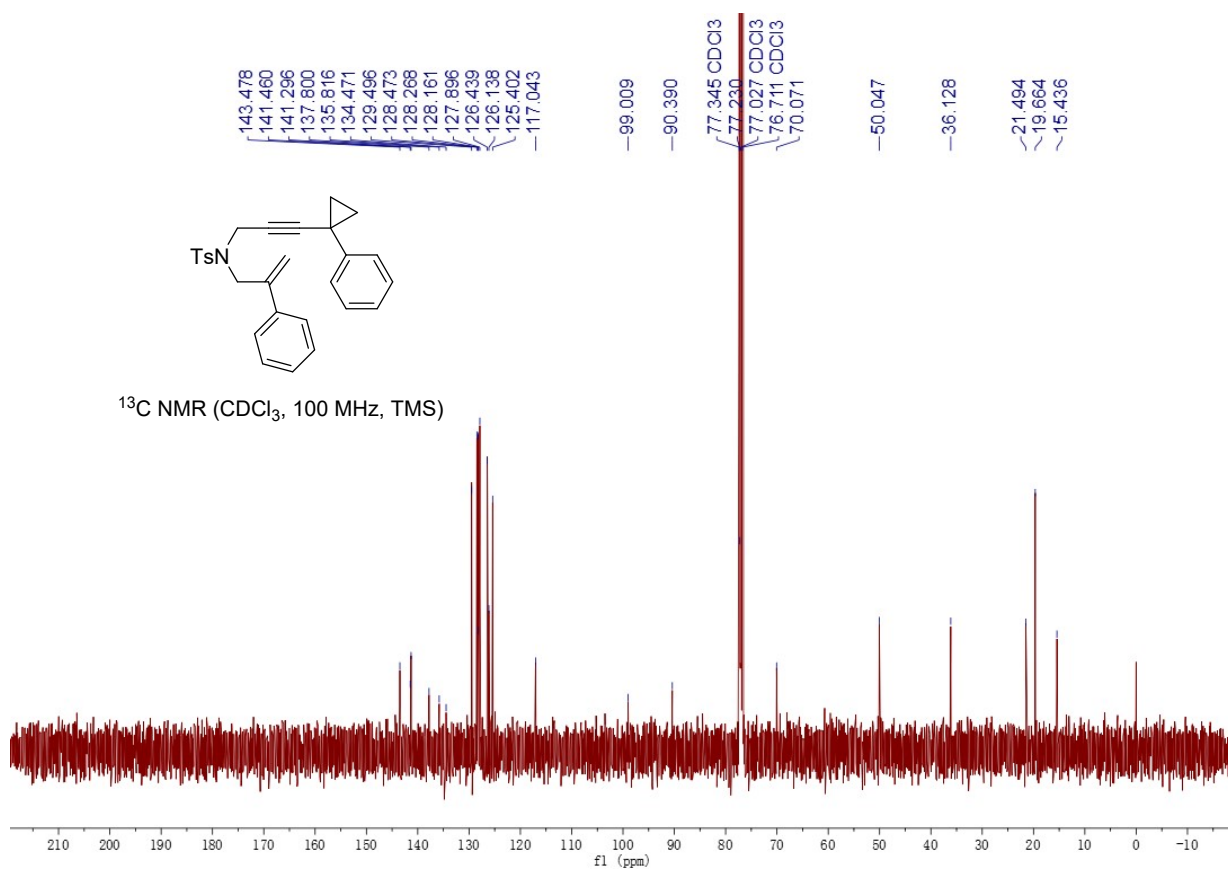

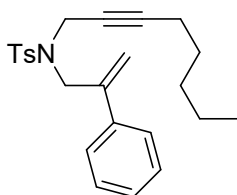

#### 4-methyl-*N*-(oct-2-yn-1-yl)-*N*-(2-phenylallyl)benzenesulfonamide (**1f**)

A colorless oil, 62% yield, 282.0 mg.  $^1\text{H}$  NMR ( $\text{CDCl}_3$ , TMS, 400 MHz)  $\delta$  7.76 (d,  $J = 8.3$  Hz, 2H), 7.57 – 7.49 (m, 2H), 7.37 – 7.28 (m, 5H), 5.56 (s, 1H), 5.33 (s, 1H), 4.24 (s, 2H), 3.97 (t,  $J = 2.3$  Hz, 2H), 2.43 (s, 3H), 1.92 – 1.82 (m, 2H), 1.27 – 1.15 (m, 6H), 0.87 (t,  $J = 7.0$  Hz, 3H).  $^{13}\text{C}$  NMR ( $\text{CDCl}_3$ , TMS, 150 MHz)  $\delta$  143.2, 141.5, 137.9, 135.9, 129.3, 128.4, 128.10, 128.06, 126.4, 116.9, 72.0, 49.9, 36.1, 31.0, 28.0, 22.1, 21.5, 18.4, 14.0. IR (Acetone)  $\nu$  711, 1087, 1197, 1381, 1498, 2306, 2977  $\text{cm}^{-1}$ . HRMS (ESI) calcd. for  $\text{C}_{24}\text{H}_{30}\text{O}_2\text{NS}$  ( $\text{M}+\text{H}$ ): 396.1992, Found: 396.1979.

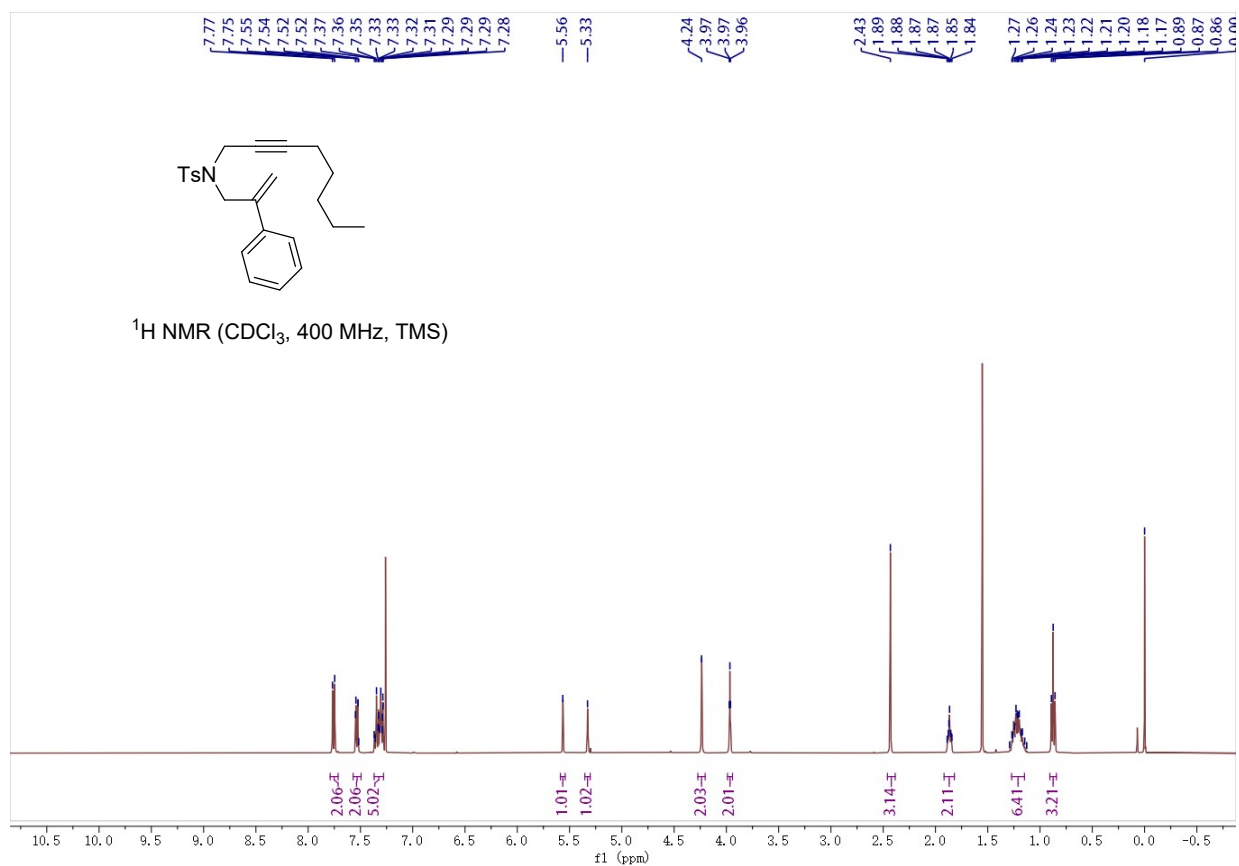

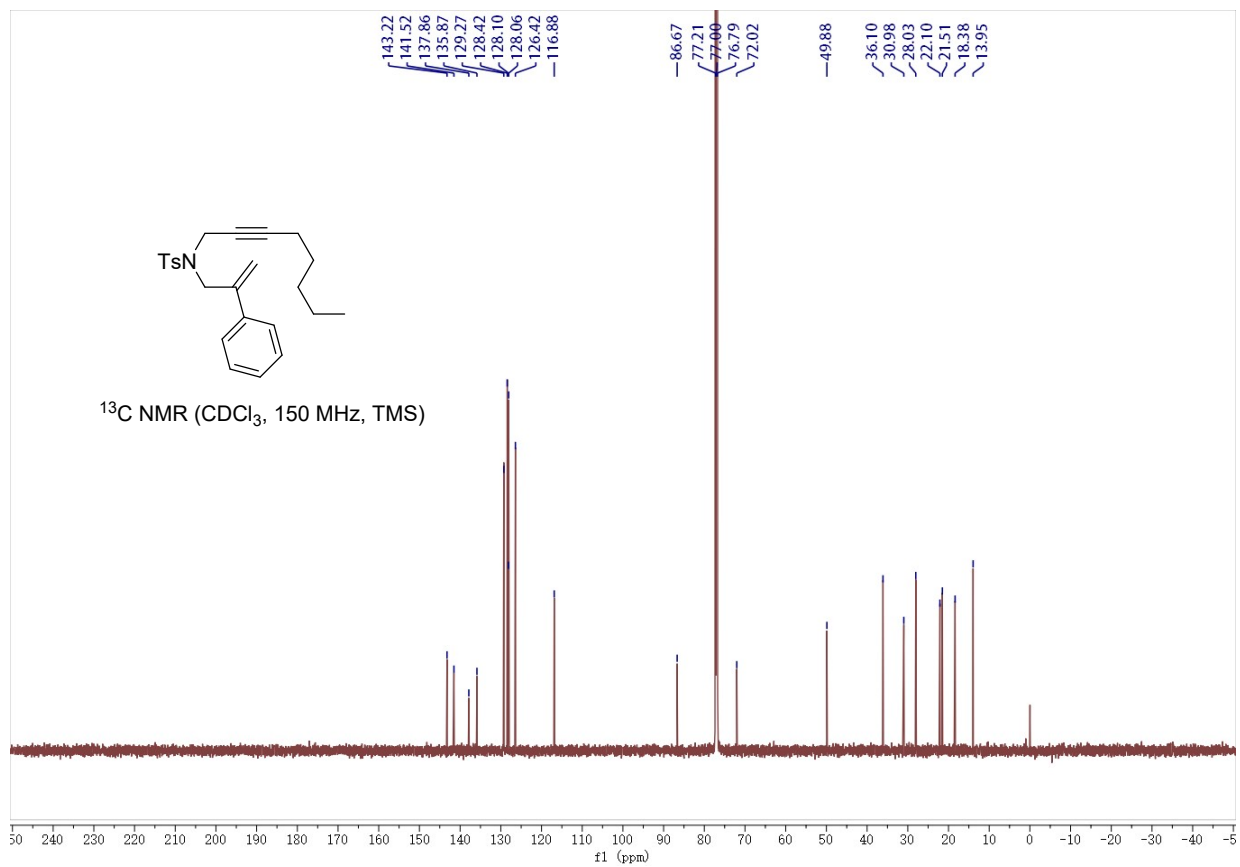

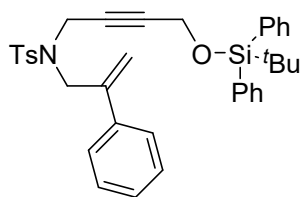

***N*-(4-((*tert*-butyldiphenylsilyloxy)but-2-yn-1-yl)-4-methyl-*N*-(2-phenylallyl)benzenesulfonamide (1g)**

A colorless oil, 53% yield, 274.3 mg.  $^1\text{H}$  NMR ( $\text{CDCl}_3$ , TMS, 400 MHz)  $\delta$  7.69 (d,  $J = 8.3$  Hz, 2H), 7.65 – 7.62 (m, 4H), 7.54 – 7.50 (m, 2H), 7.47 – 7.43 (m, 2H), 7.42 – 7.37 (m, 4H), 7.37 – 7.29 (m, 3H), 7.15 (d,  $J = 8.0$  Hz, 2H), 5.55 (s, 1H), 5.30 (s, 1H), 4.20 (s, 2H), 3.99 (s, 2H), 3.97 (s, 2H), 2.25 (s, 3H), 1.01 (s, 9H).  $^{13}\text{C}$  NMR ( $\text{CDCl}_3$ , TMS, 100 MHz)  $\delta$  143.4, 141.3, 137.7, 135.5, 132.9, 129.9, 129.3, 128.5, 128.2, 128.0, 127.8, 126.4, 117.2, 84.3, 52.3, 50.0, 36.0, 26.6, 21.4, 19.2. IR (Acetone)  $\nu$  661, 701, 1112, 1162, 1350, 2863  $\text{cm}^{-1}$ . HRMS (ESI) calcd. for  $\text{C}_{36}\text{H}_{40}\text{O}_3\text{NSSi}$  ( $\text{M}+\text{H}$ ): 594.2493, Found: 594.2488.

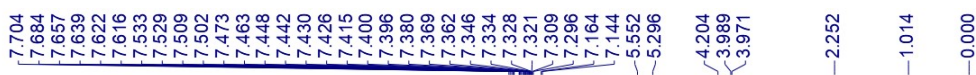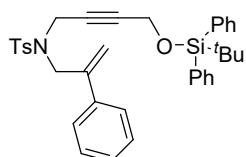

$^1\text{H}$  NMR ( $\text{CDCl}_3$ , 400 MHz, TMS)

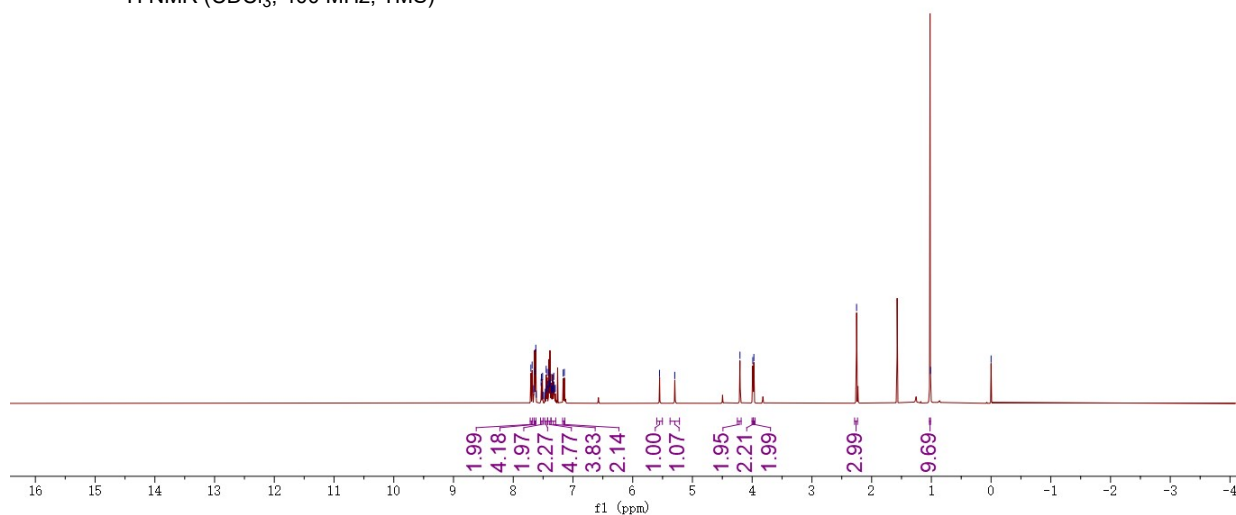

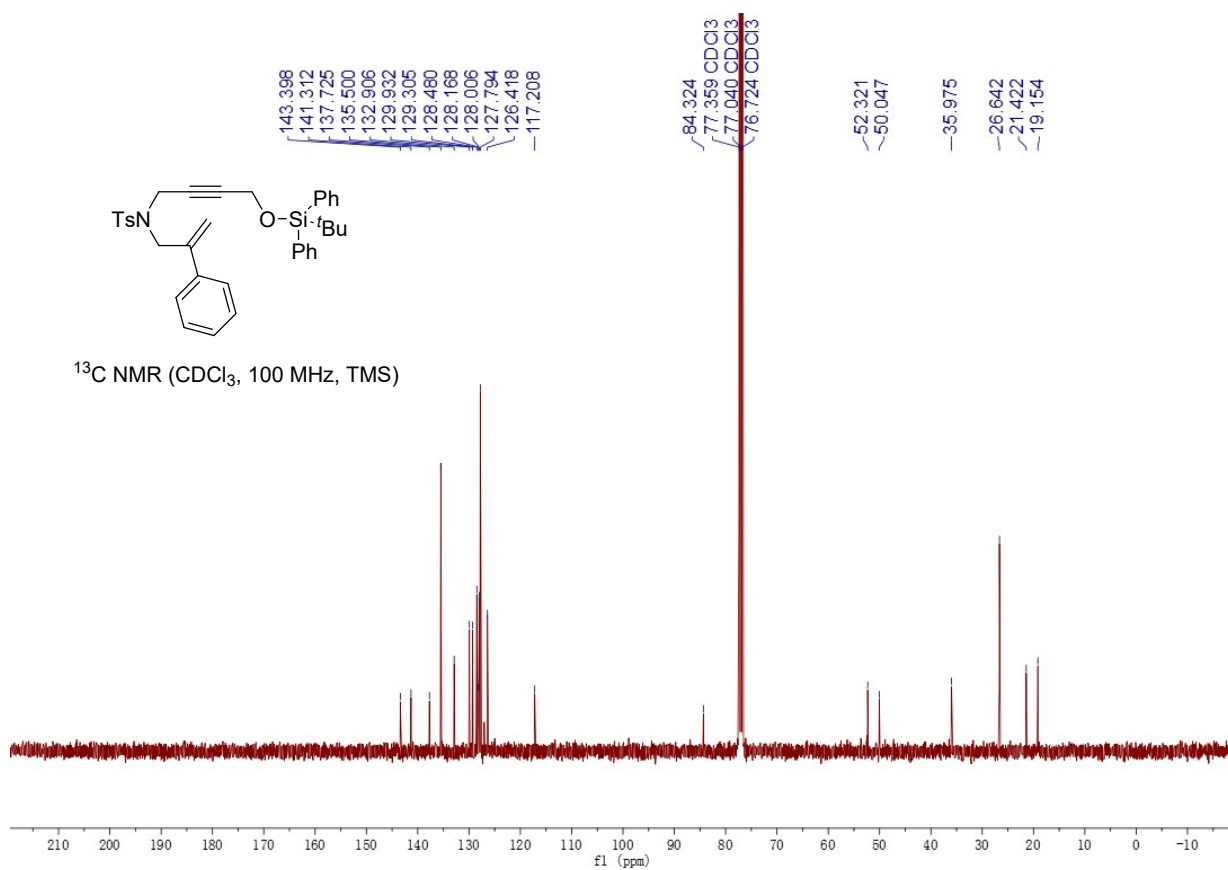

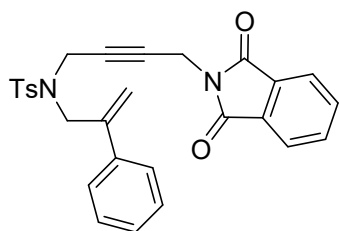

***N*-(4-(1,3-dioxoisindolin-2-yl)but-2-yn-1-yl)-4-methyl-*N*-(2-phenylallyl)benzenesulfonamide (1h)**

A colorless oil, 55% yield, 250.6 mg.  $^1\text{H}$  NMR ( $\text{CDCl}_3$ , TMS, 400 MHz)  $\delta$  7.84 – 7.79 (m, 2H), 7.73 – 7.68 (m, 2H), 7.65 (d,  $J = 8.1$  Hz, 2H), 7.44 (d,  $J = 6.7$  Hz, 2H), 7.31 – 7.21 (m, 3H), 7.19 – 7.14 (m, 2H), 5.47 (s, 1H), 5.28 (s, 1H), 4.16 (s, 2H), 4.07 (s, 2H), 3.89 (s, 2H), 2.28 (s, 3H).  $^{13}\text{C}$  NMR ( $\text{CDCl}_3$ , TMS, 100 MHz)  $\delta$  166.8, 143.6, 141.2, 137.6, 135.5, 134.3, 131.9, 129.4, 128.5, 128.1, 128.0, 126.4, 123.6, 117.4, 79.5, 75.6, 50.1, 35.8, 26.9, 21.5. IR (Acetone)  $\nu$  729, 1107, 1161, 1229, 1345, 2287, 2984  $\text{cm}^{-1}$ . HRMS (ESI) calcd. for  $\text{C}_{28}\text{H}_{25}\text{O}_4\text{N}_2\text{S}$  ( $\text{M}+\text{H}$ ): 485.1530, Found: 485.1514.

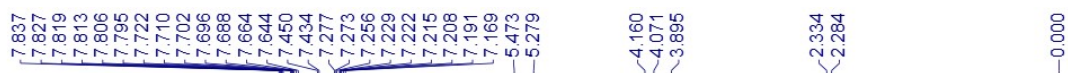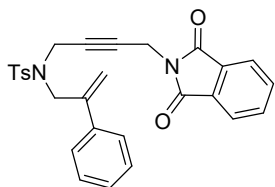

$^1\text{H}$  NMR ( $\text{CDCl}_3$ , 400 MHz, TMS)

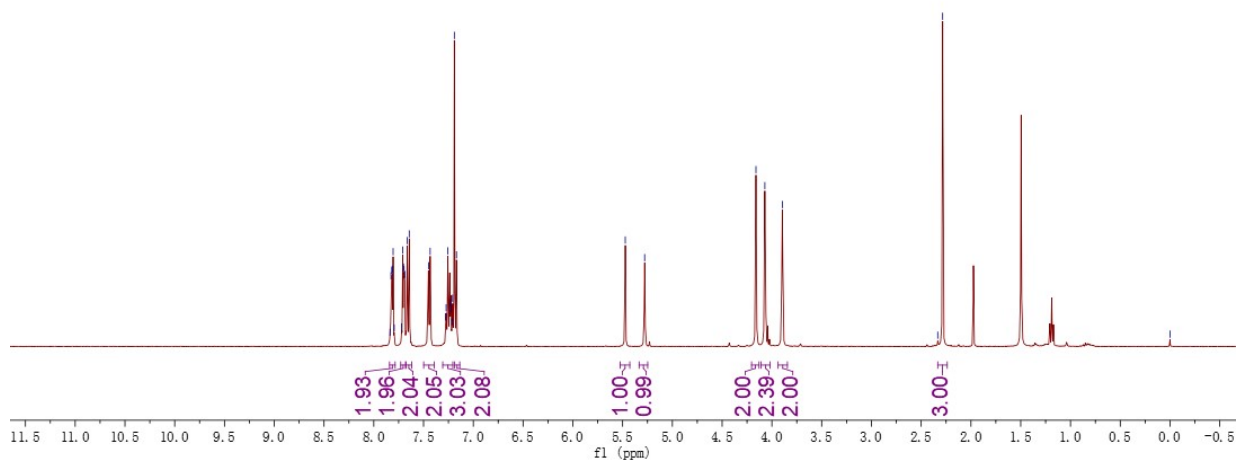

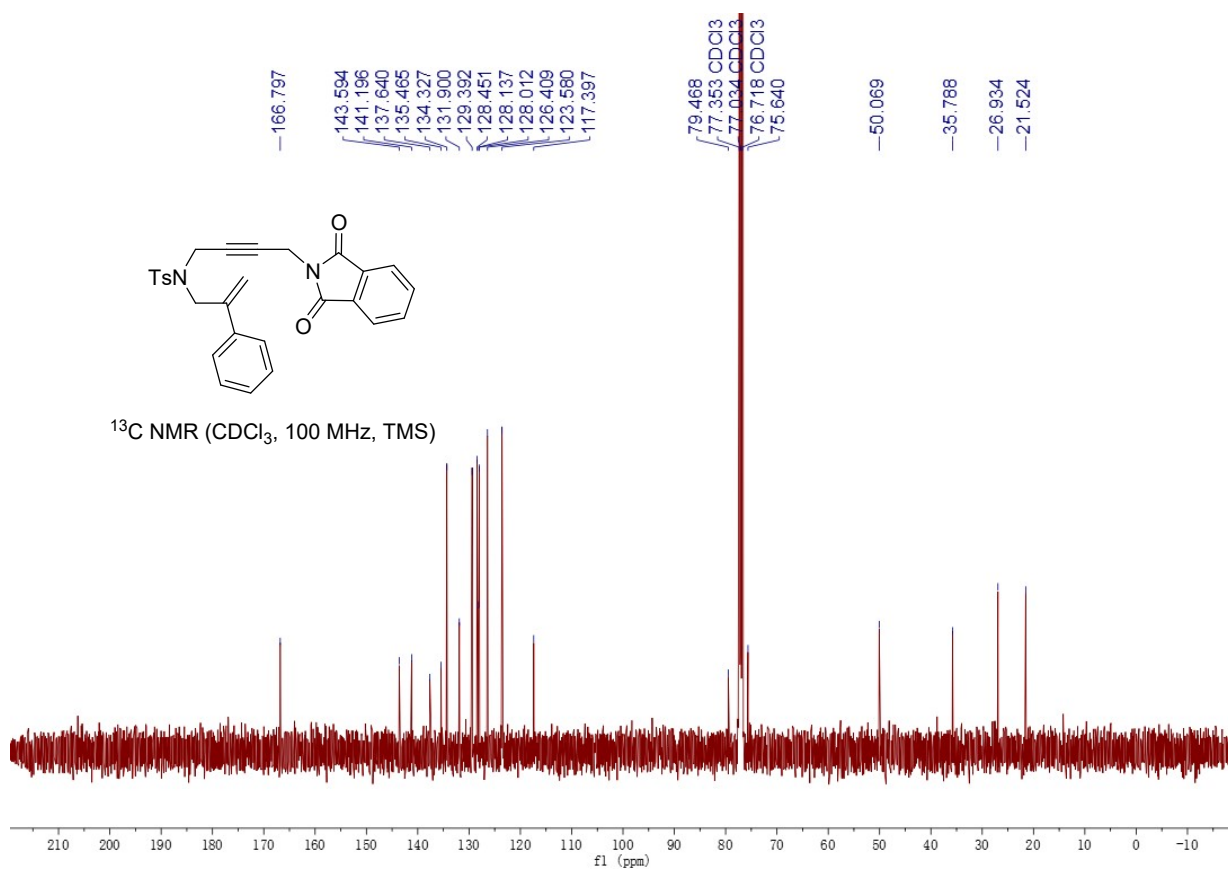

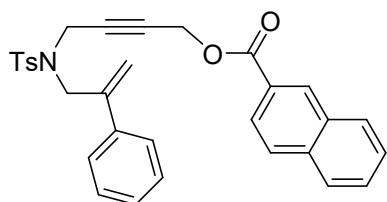

#### 4-((4-methyl-N-(2-phenylallyl)phenyl)sulfonamido)but-2-yn-1-yl 2-naphthoate (**1i**)

A colorless oil, 42% yield, 203.9 mg.  $^1\text{H}$  NMR ( $\text{CDCl}_3$ , TMS, 400 MHz)  $\delta$  8.88 (d,  $J = 7.9$  Hz, 1H), 8.16 (d,  $J = 7.3$  Hz, 1H), 8.07 (d,  $J = 8.2$  Hz, 1H), 7.92 (d,  $J = 8.2$  Hz, 1H), 7.77 – 7.72 (m, 2H), 7.66 – 7.50 (m, 5H), 7.41 – 7.29 (m, 4H), 7.20 (d,  $J = 8.0$  Hz, 2H), 5.57 (s, 1H), 5.37 (s, 1H), 4.69 (s, 2H), 4.28 (s, 2H), 4.06 (s, 2H), 2.23 (s, 3H).  $^{13}\text{C}$  NMR ( $\text{CDCl}_3$ , TMS, 100 MHz)  $\delta$  166.4, 143.7, 141.3, 137.6, 135.5, 135.3, 134.0, 131.4, 130.6, 129.4, 128.7, 128.5, 128.2, 128.1, 128.0, 126.4, 125.6, 124.5, 117.4, 80.3, 79.4, 52.3, 50.2, 35.9, 21.4. IR (Acetone)  $\nu$  661, 779, 1061, 1128, 1159, 1239, 1342, 3052  $\text{cm}^{-1}$ . HRMS (ESI) calcd. for  $\text{C}_{31}\text{H}_{28}\text{O}_4\text{NS}$  (M+H): 510.1734, Found: 510.1718.

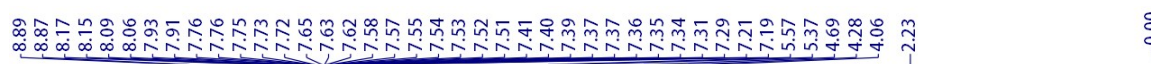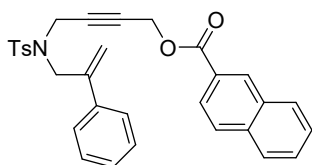

$^1\text{H}$  NMR ( $\text{CDCl}_3$ , 400 MHz, TMS)

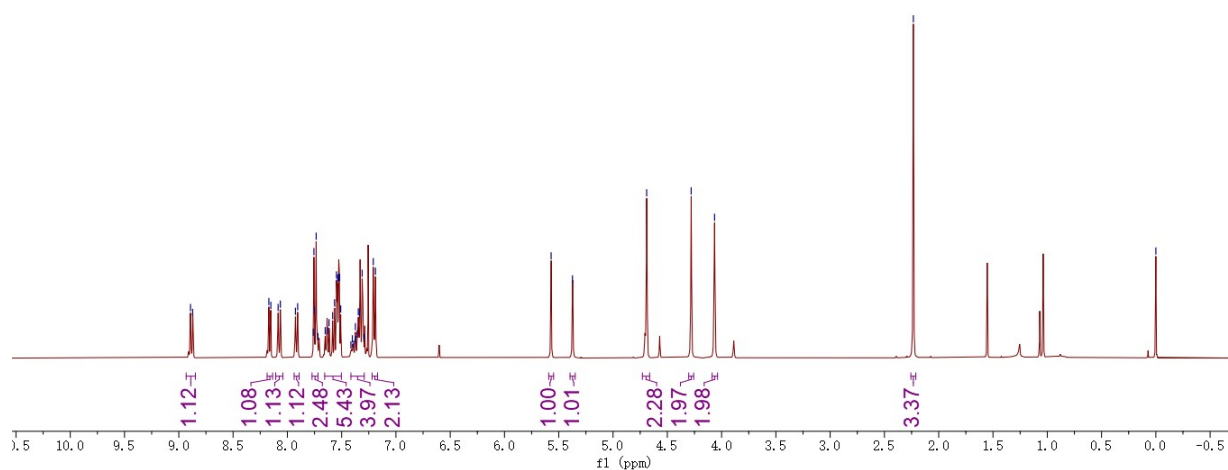



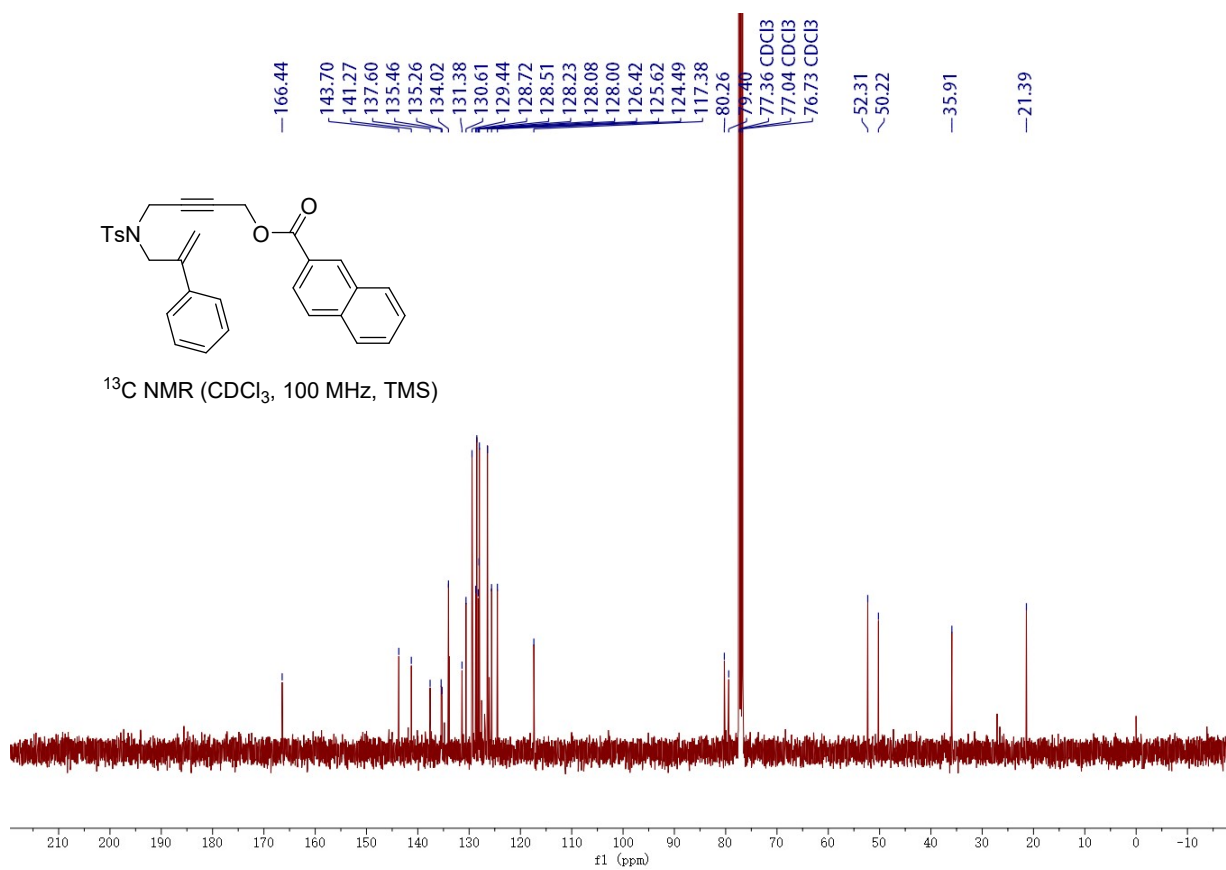

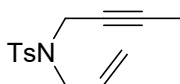

***N*-allyl-*N*-(but-2-yn-1-yl)-4-methylbenzenesulfonamide (1j)**

This is a known compound and its spectroscopic data are consistent with those reported in the previous literature,<sup>[7]</sup> 80% yield, 238.0 mg. <sup>1</sup>H NMR (400 MHz, CDCl<sub>3</sub>, TMS) δ 7.70 (d, *J* = 8.2 Hz, 2H), 7.27 (d, *J* = 8.2 Hz, 2H), 5.75 – 5.65 (m, 1H), 5.29 – 5.13 (m, 2H), 4.05 – 3.94 (m, 2H), 3.77 (q, *J* = 6.0 Hz, 2H), 2.39 (s, 3H), 1.50 (s, 3H).

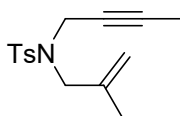

***N*-(but-2-yn-1-yl)-4-methyl-*N*-(2-methylallyl)benzenesulfonamide (1k)**

This is a known compound and its spectroscopic data are consistent with those reported in the previous literature,<sup>[7]</sup> 89% yield, 348.0 mg. <sup>1</sup>H NMR (400 MHz, CDCl<sub>3</sub>, TMS) δ 7.75 – 7.73 (m, 2H), 7.30 – 7.28 (m, 2H), 4.94 (q, *J* = 1.0 Hz, 2H), 3.97 (q, *J* = 2.3 Hz, 2H), 3.69 (s, 2H), 2.42 (s, 3H), 1.75 (t, *J* = 1.1 Hz, 3H), 1.50 (t, *J* = 2.3 Hz, 3H).

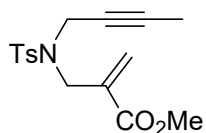

**methyl 2-(((*N*-(but-2-yn-1-yl)-4-methylphenyl)sulfonamido)methyl)acrylate (11)**

A colorless oil, 62% yield, 282.5 mg.  $^1\text{H}$  NMR ( $\text{CDCl}_3$ , TMS, 400 MHz)  $\delta$  7.75 (d,  $J = 8.3$  Hz, 2H), 7.30 (d,  $J = 8.0$  Hz, 2H), 6.37 (s, 1H), 5.93 (s, 1H), 4.08 – 4.00 (m, 4H), 3.75 (s, 3H), 2.42 (s, 3H), 1.53 (t,  $J = 2.4$  Hz, 3H).  $^{13}\text{C}$  NMR ( $\text{CDCl}_3$ , TMS, 100 MHz)  $\delta$  166.3, 143.4, 136.0, 134.8, 129.3, 127.8, 127.3, 81.9, 71.6, 52.0, 46.6, 37.4, 21.5, 3.2. IR (Acetone)  $\nu$  764, 1091, 1165, 1371, 2125, 2966  $\text{cm}^{-1}$ . HRMS (ESI) calcd. for  $\text{C}_{16}\text{H}_{19}\text{NO}_4\text{S}$  (M+H): 322.1133, Found: 322.1096.

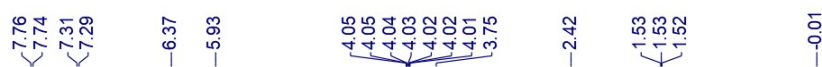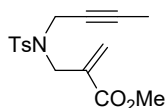

$^1\text{H}$  NMR ( $\text{CDCl}_3$ , 400 MHz, TMS)

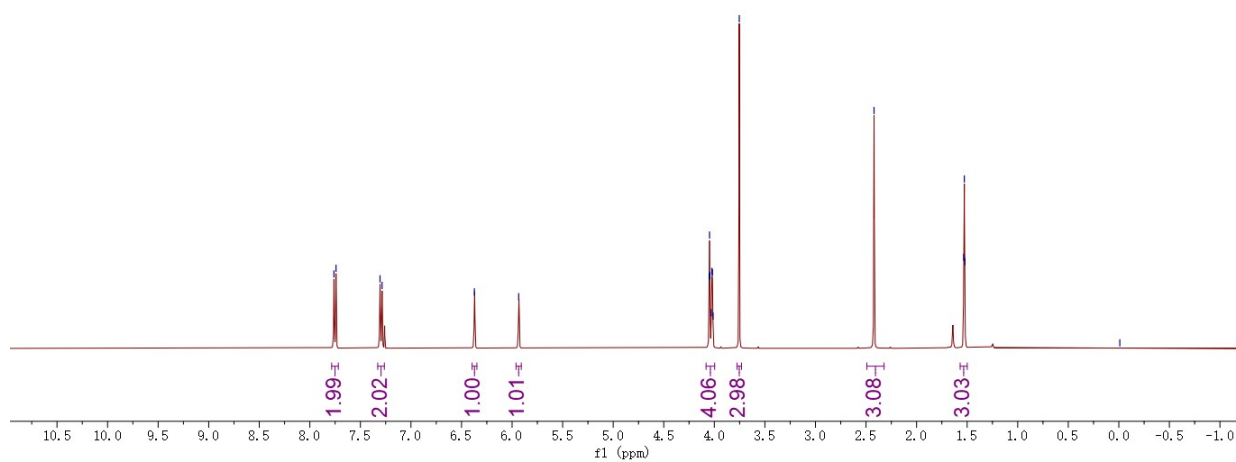

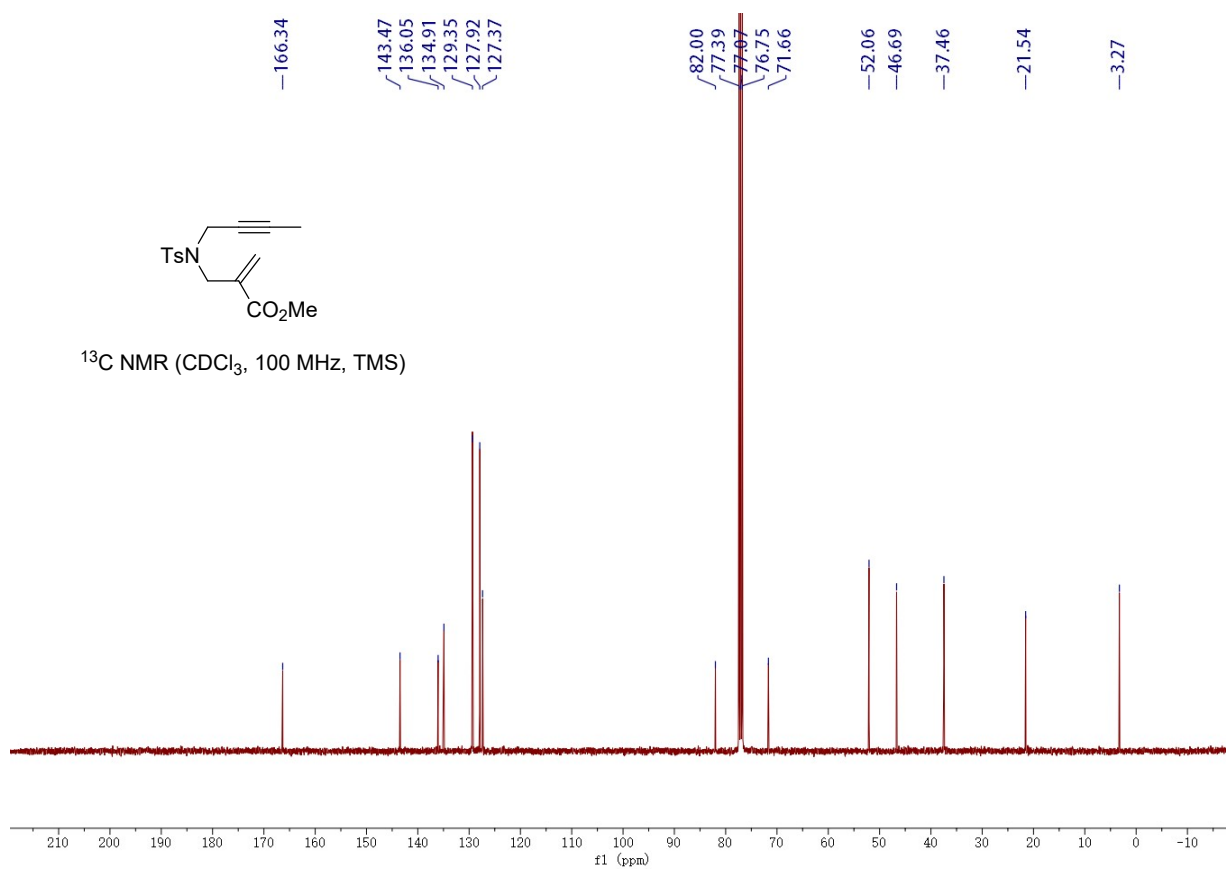

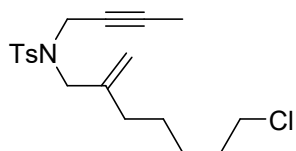

***N*-(but-2-yn-1-yl)-*N*-(7-chloro-2-methyleneheptyl)-4-methylbenzenesulfonamide (1m)**

A colorless oil, 59%, 271.1 mg.  $^1\text{H}$  NMR ( $\text{CDCl}_3$ , TMS, 600 MHz)  $\delta$  7.76 (d,  $J = 8.4$  Hz, 2H), 7.32 (d,  $J = 8.1$  Hz, 2H), 5.02 (s, 1H), 4.98 (s, 1H), 3.98 (d,  $J = 2.5$  Hz, 2H), 3.73 (s, 2H), 3.57 (t,  $J = 6.7$  Hz, 2H), 2.45 (s, 3H), 2.10 (t,  $J = 7.2$  Hz, 2H), 1.87 – 1.77 (m, 2H), 1.57 – 1.41 (m, 7H).  $^{13}\text{C}$  NMR ( $\text{CDCl}_3$ , TMS, 100 MHz)  $\delta$  143.2, 143.1, 136.1, 129.2, 128.0, 114.6, 81.6, 71.4, 51.1, 45.1, 36.0, 32.8, 32.4, 26.6, 26.5, 3.2. IR (Acetone)  $\nu$  730, 987, 1258, 2983  $\text{cm}^{-1}$ . HRMS (ESI) calcd. for  $\text{C}_{19}\text{H}_{27}\text{O}_2\text{NCIS}$  ( $\text{M}+\text{H}$ ): 368.1446, Found: 368.1434.

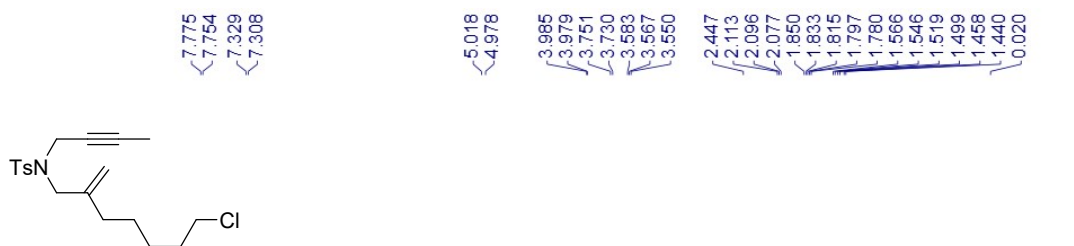

$^1\text{H}$  NMR ( $\text{CDCl}_3$ , 400 MHz, TMS)

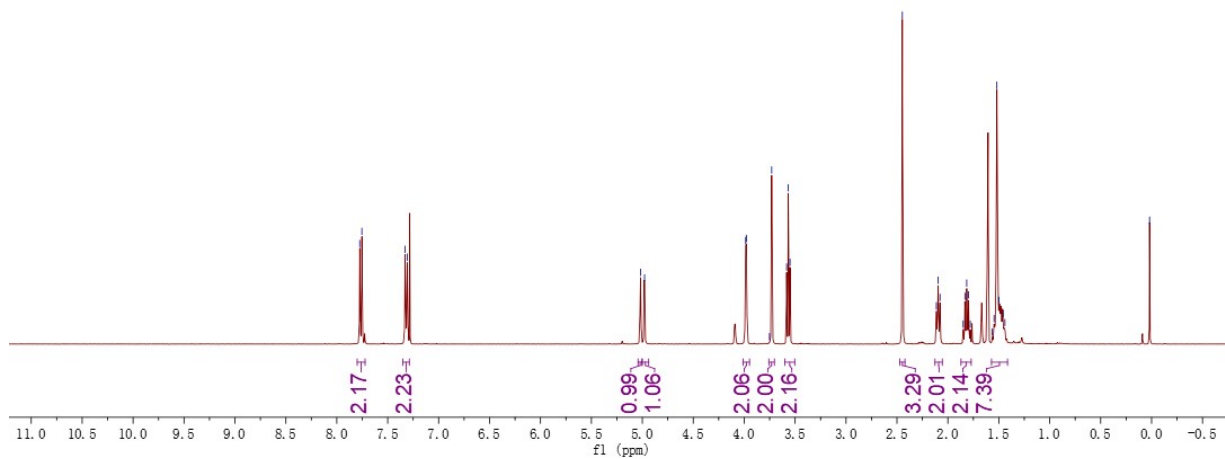

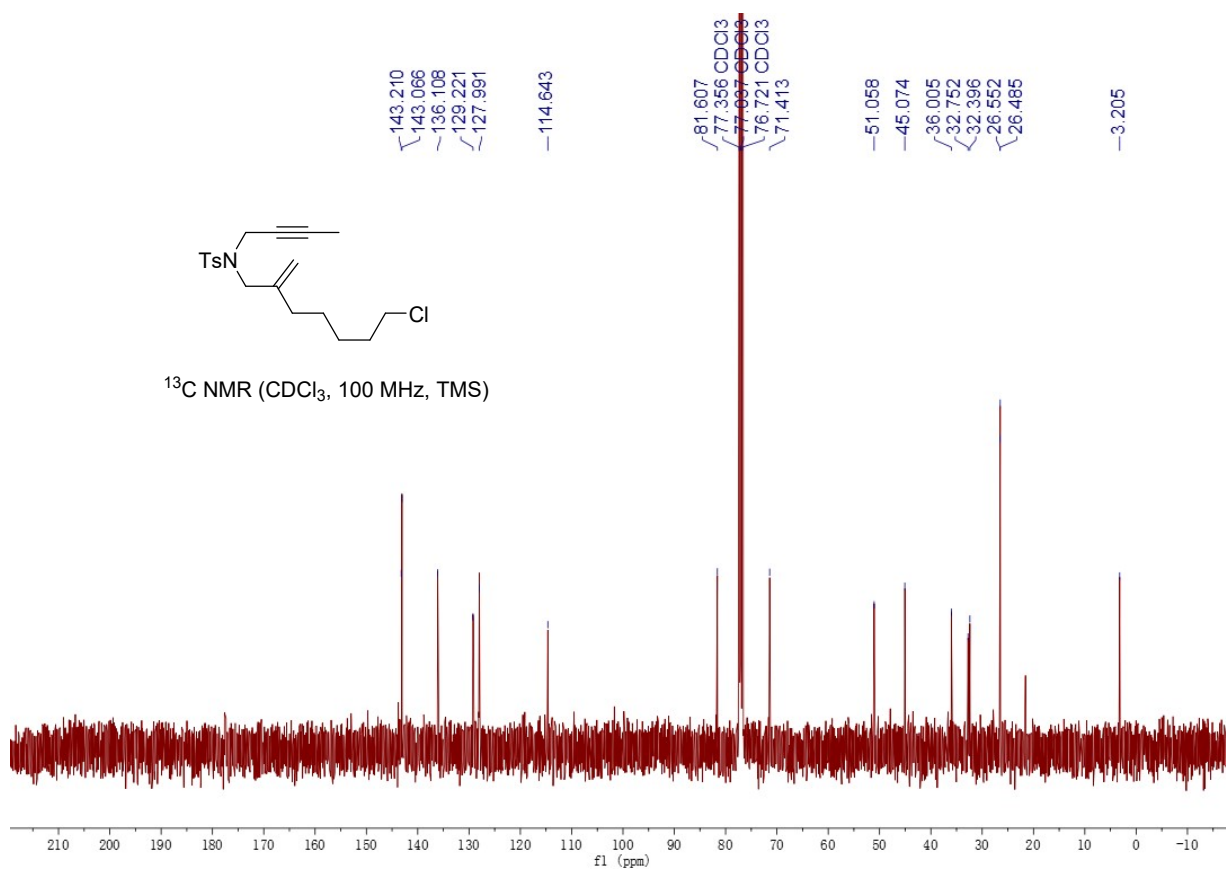

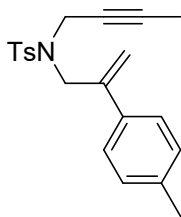

***N*-(but-2-yn-1-yl)-4-methyl-*N*-(2-(*p*-tolyl)allyl)benzenesulfonamide (1n)**

A colorless oil, 38% yield, 197.2 mg.  $^1\text{H}$  NMR ( $\text{CDCl}_3$ , TMS, 400 MHz)  $\delta$  7.75 (d,  $J = 8.2$  Hz, 2H), 7.42 (d,  $J = 8.2$  Hz, 2H), 7.30 (d,  $J = 8.1$  Hz, 2H), 7.15 (d,  $J = 8.0$  Hz, 2H), 5.52 (s, 1H), 5.27 (s, 1H), 4.20 (s, 2H), 3.92 (s, 2H), 2.44 (s, 3H), 2.35 (s, 3H), 1.50 (t,  $J = 2.4$  Hz, 3H).  $^{13}\text{C}$  NMR ( $\text{CDCl}_3$ , TMS, 100 MHz)  $\delta$  143.2, 141.4, 138.0, 135.8, 134.9, 129.2, 129.1, 128.1, 126.3, 116.1, 81.8, 71.4, 50.1, 36.1, 21.5, 21.2, 3.2. IR (Acetone)  $\nu$  719, 801, 1104, 1209, 1346, 1510, 2914  $\text{cm}^{-1}$ . HRMS (ESI) calcd. for  $\text{C}_{21}\text{H}_{24}\text{O}_2\text{NS}$  ( $\text{M}+\text{H}$ ): 354.1522, Found: 354.1512.

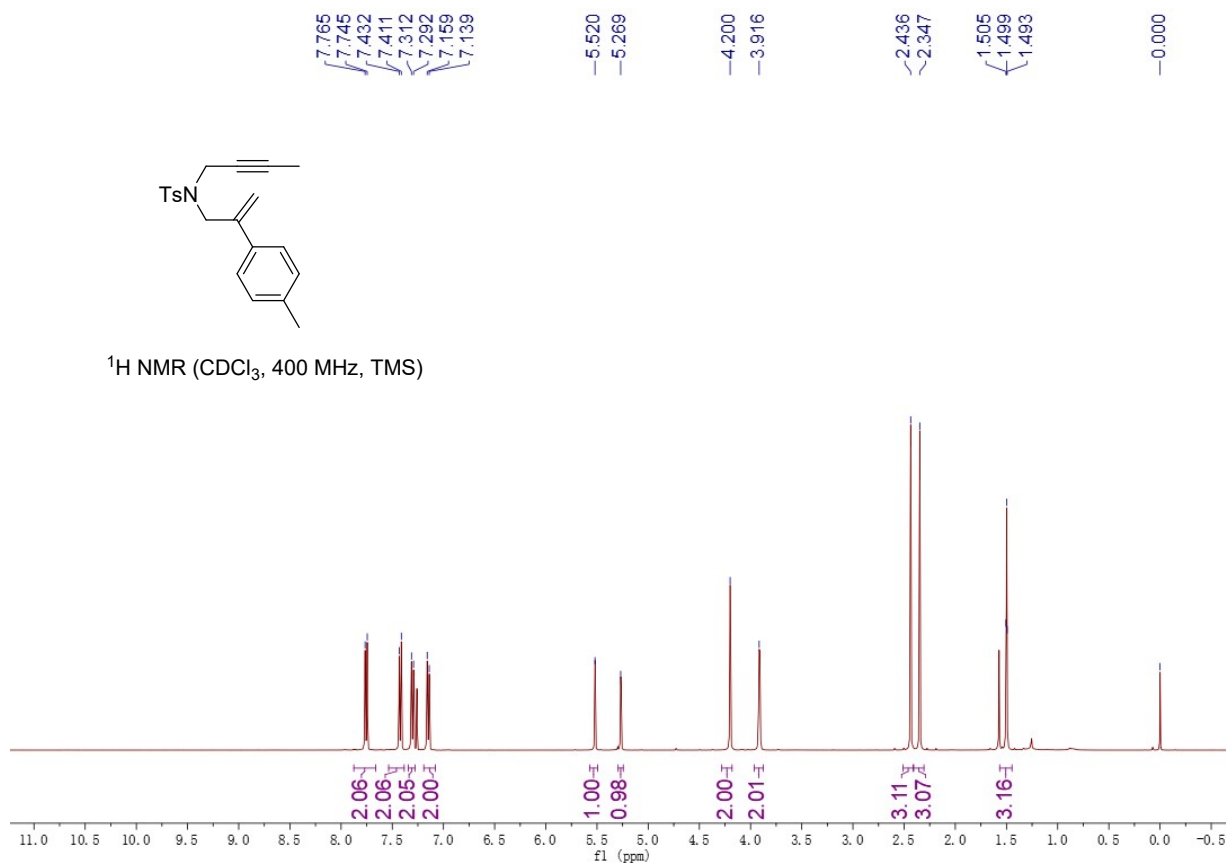

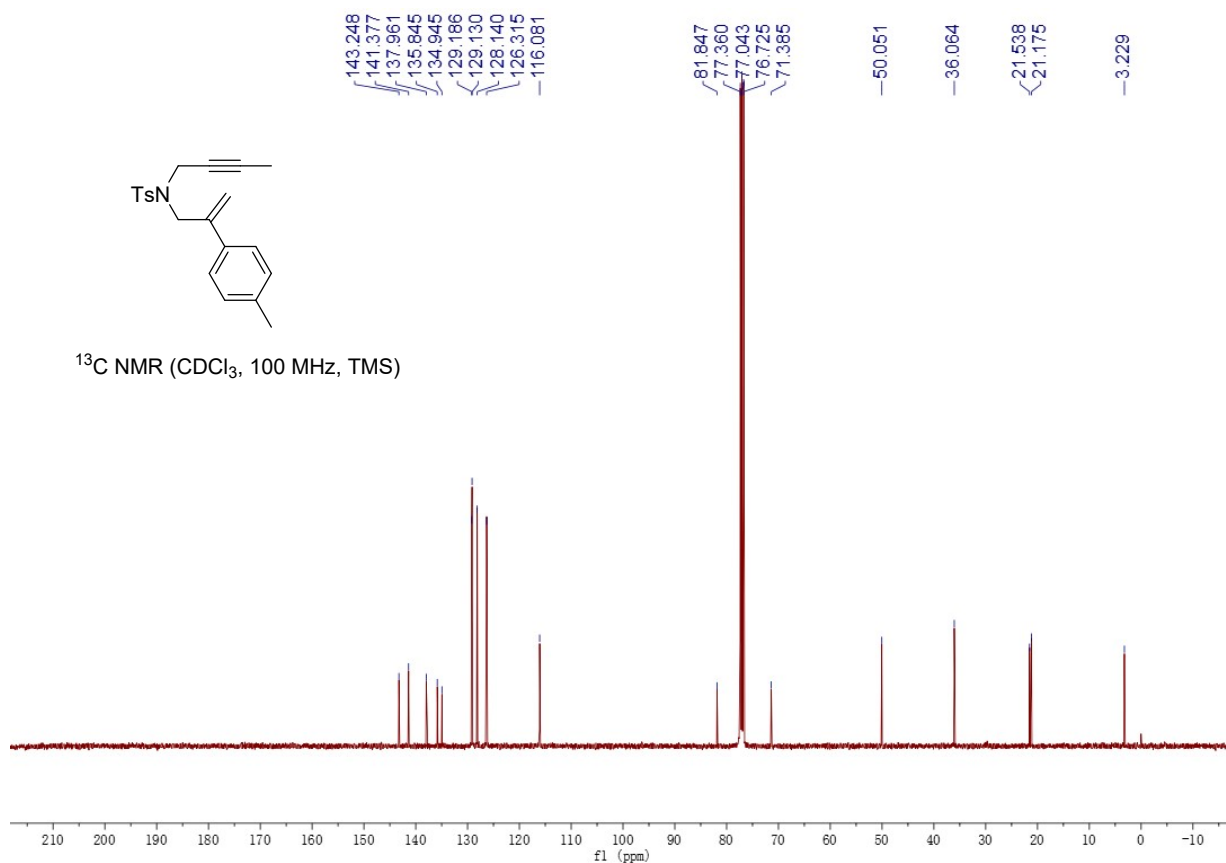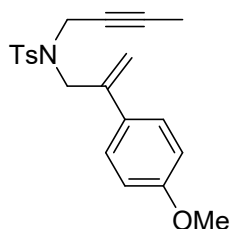

***N*-(but-2-yn-1-yl)-*N*-(2-(4-methoxyphenyl)allyl)-4-methylbenzenesulfonamide (1o)**

This is a known compound and its spectroscopic data are consistent with those reported in the previous literature,<sup>[6]</sup> 62% yield, 218.0 mg. <sup>1</sup>H NMR (300 MHz, CDCl<sub>3</sub>, TMS) δ 7.74 (d, *J* = 8.2 Hz, 2 H), 7.48 – 7.46 (m, 2 H), 7.29 (d, *J* = 8.2 Hz, 2 H), 6.86 (d, *J* = 8.9 Hz, 2 H), 5.46 (s, 1 H), 5.20 (s, 1 H), 4.17 (s, 2 H), 3.89 (q, *J* = 2.1 Hz, 2 H), 3.80 (s, 3 H), 2.42 (s, 3 H), 1.48 (t, *J* = 2.3 Hz, 3 H) <sup>13</sup>C NMR (75.5 MHz, CDCl<sub>3</sub>, TMS) δ 187.8, 142.8, 142.7, 139.2, 137.4, 129.4, 128.2, 127.7, 127.3, 126.5, 115.8, 108.0, 79.7, 50.6, 48.8, 38.2, 32.1, 26.3, 26.2, 21.4, 6.9.



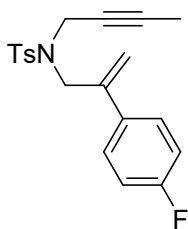

***N*-(but-2-yn-1-yl)-*N*-(2-(4-fluorophenyl)allyl)-4-methylbenzenesulfonamide (1p)**

A colorless oil, 41% yield, 193.4 mg.  $^1\text{H}$  NMR ( $\text{CDCl}_3$ , TMS, 600 MHz)  $\delta$  7.75 (d,  $J = 8.3$  Hz, 2H), 7.58 – 7.46 (m, 2H), 7.31 (d,  $J = 8.0$  Hz, 2H), 7.11 – 6.93 (m, 2H), 5.50 (s, 1H), 5.30 (s, 1H), 4.19 (s, 2H), 3.91 (s, 2H), 2.44 (s, 3H), 1.50 (t,  $J = 2.4$  Hz, 3H).  $^{13}\text{C}$  NMR ( $\text{CDCl}_3$ , TMS, 100 MHz)  $\delta$  162.7 (d,  $J = 245.6$  Hz), 143.4, 140.6, 135.7, 133.8 (d,  $J = 3.5$  Hz), 129.2, 128.2 (d,  $J = 7.9$  Hz), 128.1, 116.9, 115.3 (d,  $J = 21.6$  Hz), 82.0, 71.2, 50.1, 36.1, 21.5, 3.2.  $^{19}\text{F}$  NMR ( $\text{CDCl}_3$ , TMS, 376 MHz)  $\delta$  -114.0 (s). IR (Acetone)  $\nu$  659, 842, 1095, 1160, 1347, 1511, 2198, 2914  $\text{cm}^{-1}$ . HRMS (ESI) calcd. for  $\text{C}_{20}\text{H}_{21}\text{O}_2\text{NFS}$  (M+H): 358.1272, Found: 358.1260.

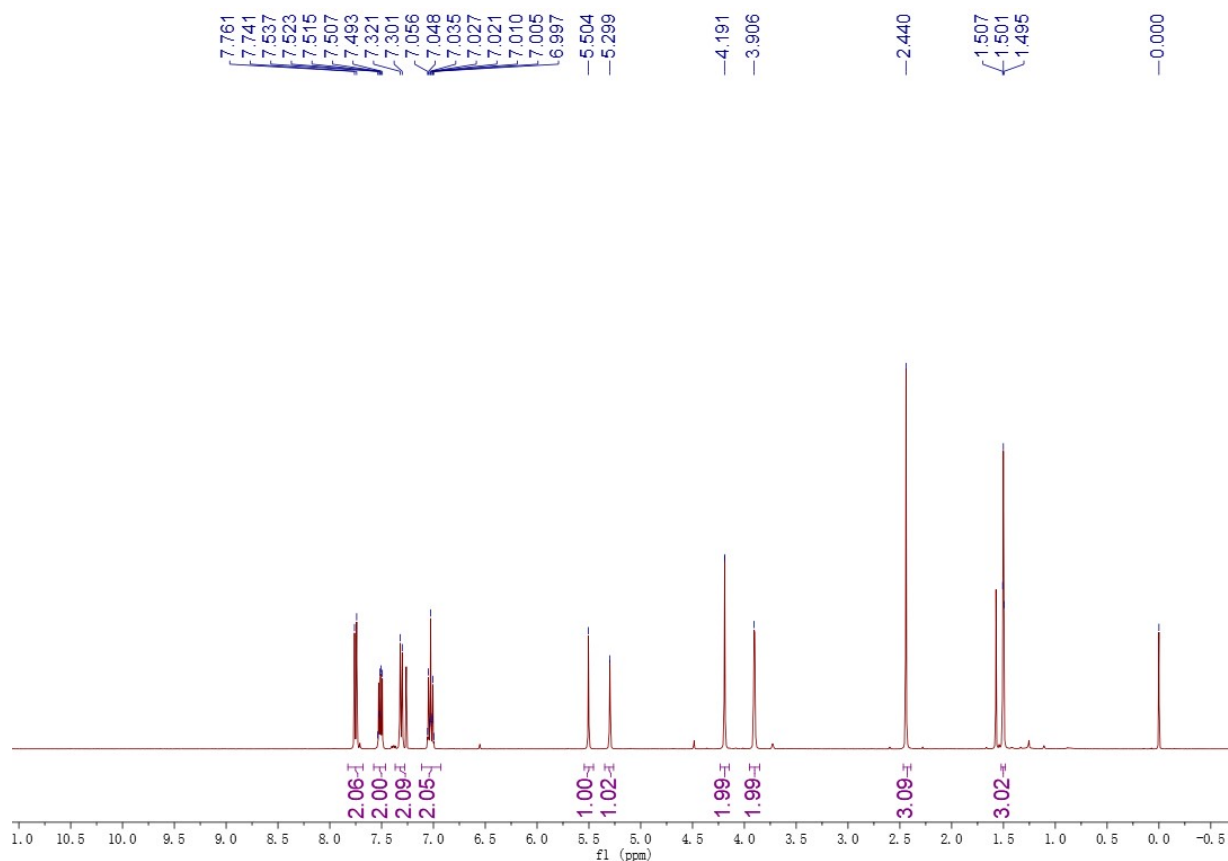

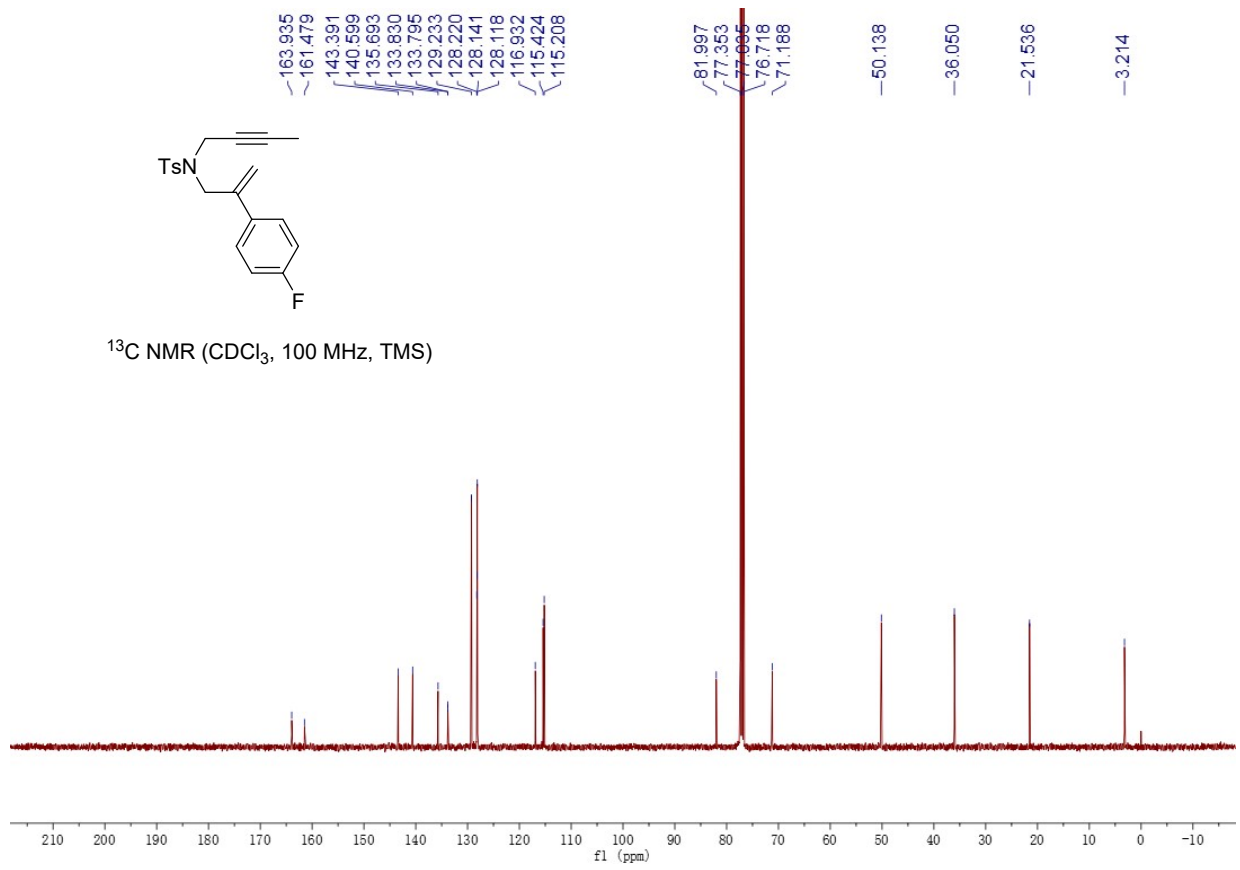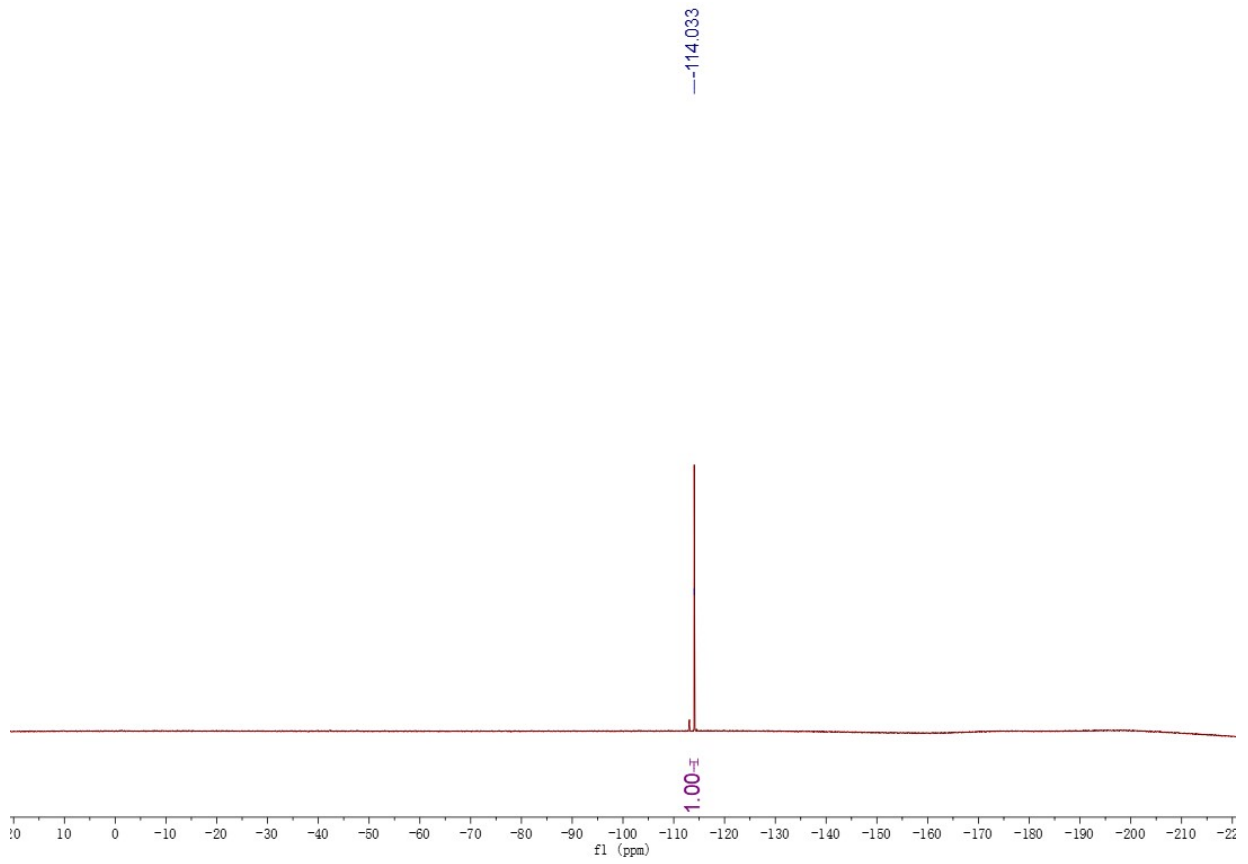

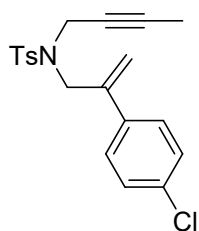

***N*-(but-2-yn-1-yl)-*N*-(2-(4-chlorophenyl)allyl)-4-methylbenzenesulfonamide (1q)**

This is a known compound and its spectroscopic data are consistent with those reported in the previous literature,<sup>[8]</sup> 63% yield, 288.0 mg. <sup>1</sup>H NMR (400 MHz, CDCl<sub>3</sub>, TMS) δ 7.96 (dd, *J* = 1.5, 8.0 Hz, 1H), 7.45 (dt, *J* = 7.5 Hz, *J* = 1.5 Hz, 1H), 7.31 (m, 1H), 7.10 – 7.24 (m, 5H), 5.46 (s, 1H), 5.37 (s, 1H), 4.25 (s, 2H), 3.92 (q, *J* = 2.4 Hz, 2H), 2.41 (s, 3H), 1.69 (t, *J* = 2.4 Hz, 3H). <sup>13</sup>C NMR (100 MHz, CDCl<sub>3</sub>, TMS) δ 141.2, 138.5, 137.2, 136.7, 134.0, 133.0, 132.8, 130.4, 128.6, 127.8, 126.2, 118.3, 82.0, 72.2, 50.3, 35.8, 20.9, 3.9.

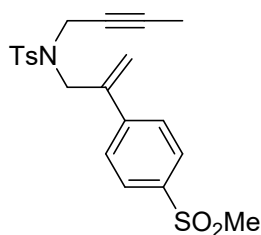

***N*-(but-2-yn-1-yl)-4-methyl-*N*-(2-(4-(methylsulfonyl)phenyl)allyl)benzenesulfonamide (1r)**

A colorless oil, 68% yield, 197.2 mg. <sup>1</sup>H NMR (CDCl<sub>3</sub>, TMS, 400 MHz) δ 7.92 (d, *J* = 8.4 Hz, 2H), 7.79 – 7.70 (m, 4H), 7.33 (d, *J* = 8.1 Hz, 2H), 5.68 (s, 1H), 5.49 (s, 1H), 4.25 (s, 2H), 3.90 (s, 2H), 3.08 (s, 3H), 2.45 (s, 3H), 1.50 (t, *J* = 2.4 Hz, 3H). <sup>13</sup>C NMR (CDCl<sub>3</sub>, TMS, 100 MHz) δ 148.0, 144.0, 139.7, 133.4, 133.1, 131.1, 129.7, 127.9, 127.3, 127.1, 66.2, 60.0, 45.9, 45.6, 44.6, 21.5, 14.9. IR (Acetone) ν 660, 1092, 1161, 1349, 1491, 2988 cm<sup>-1</sup>. HRMS (ESI) calcd. for C<sub>21</sub>H<sub>24</sub>O<sub>4</sub>NS<sub>2</sub> (M+H): 418.1141, Found: 418.1125.

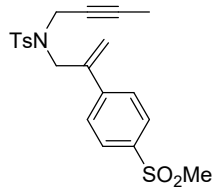

<sup>1</sup>H NMR (CDCl<sub>3</sub>, 400 MHz, TMS)

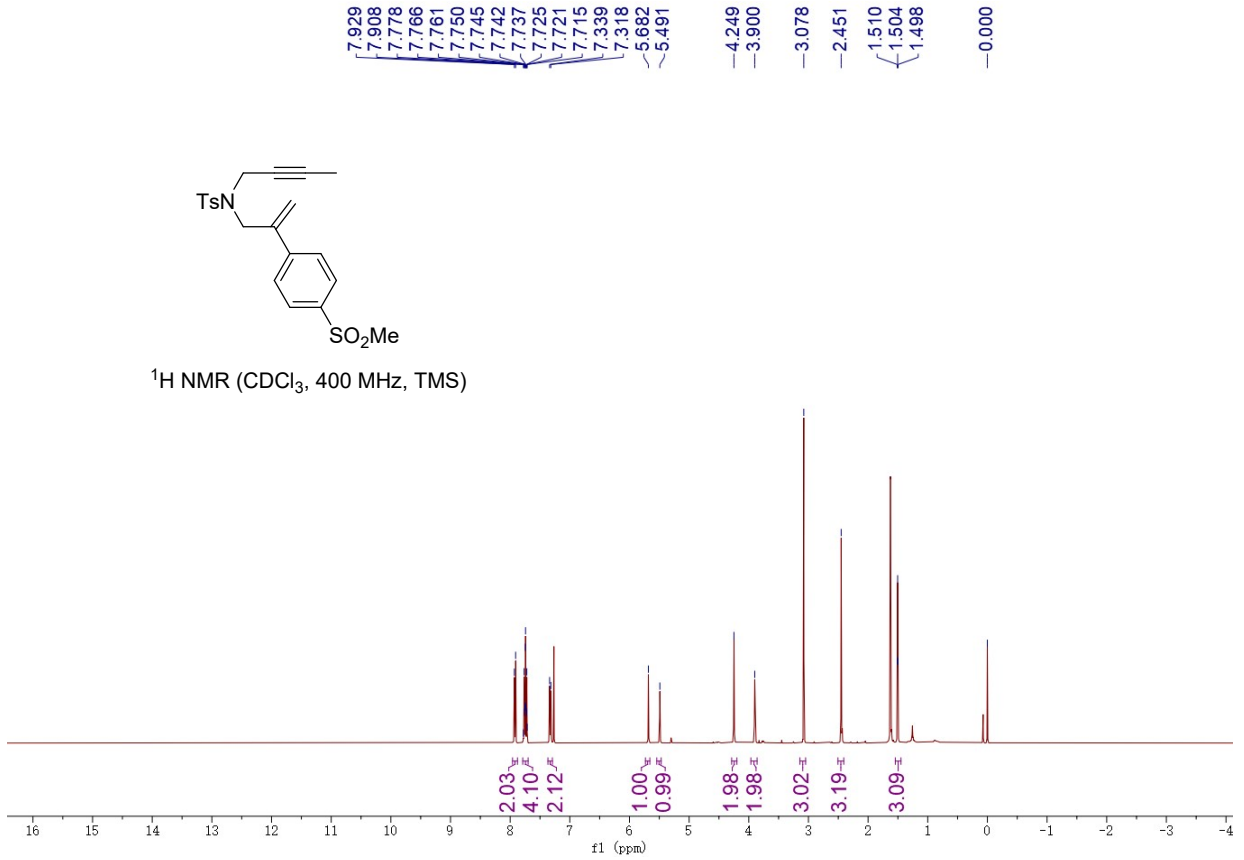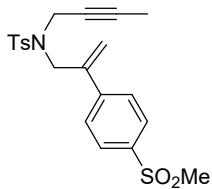

<sup>13</sup>C NMR (CDCl<sub>3</sub>, 100 MHz, TMS)

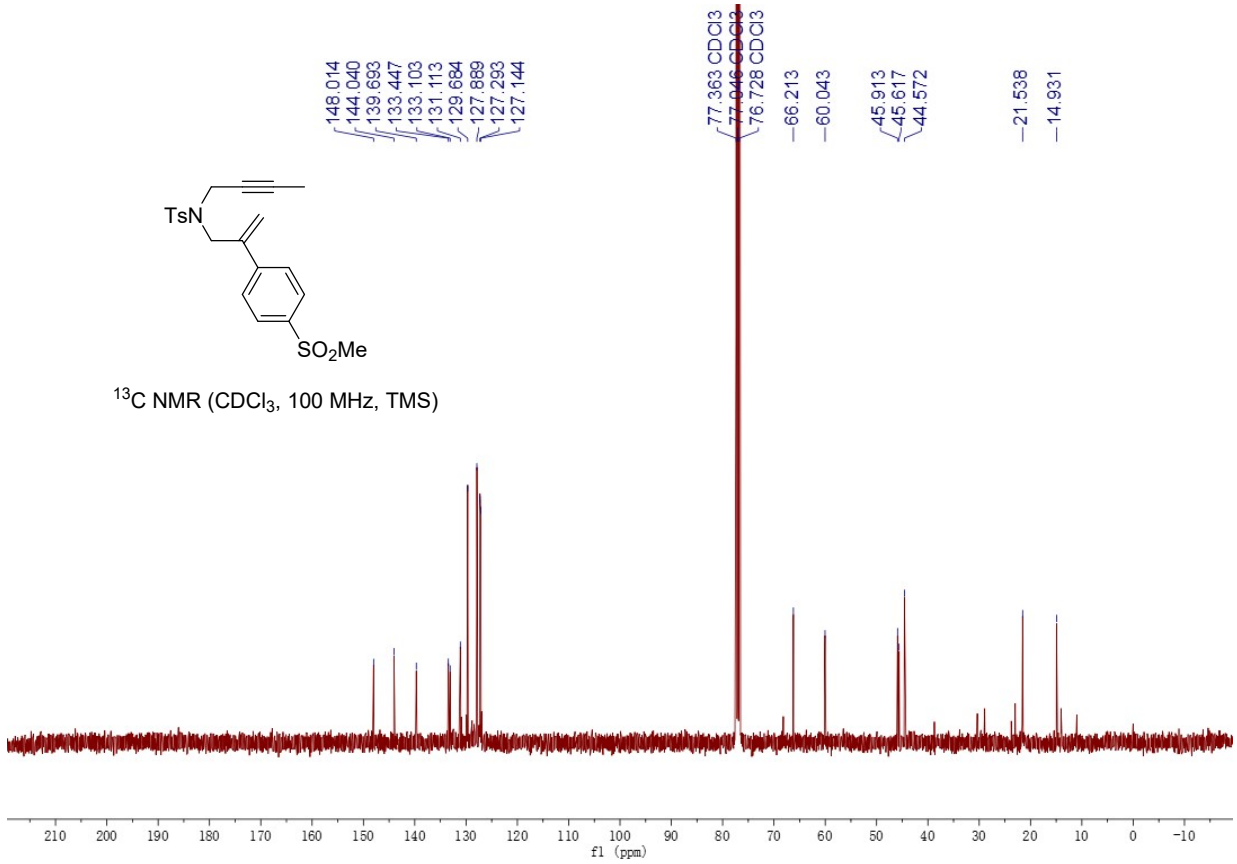

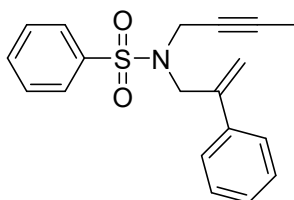

***N*-(but-2-yn-1-yl)-*N*-(2-phenylallyl)benzenesulfonamide (1s)**

A colorless oil, 44.1 mg, 78% yield. <sup>1</sup>H NMR (CDCl<sub>3</sub>, TMS, 400 MHz) δ 7.95 – 7.81 (m, 2H), 7.63 – 7.45 (m, 5H), 7.38 – 7.28 (m, 3H), 5.56 (s, 1H), 5.33 (s, 1H), 4.25 (s, 2H), 3.94 (s, 2H), 1.49 (t, *J* = 2.4 Hz, 3H). <sup>13</sup>C NMR (CDCl<sub>3</sub>, TMS, 150 MHz) δ 141.5, 138.7, 137.8, 132.6, 128.6, 128.5, 128.1, 128.1, 126.4, 117.0, 82.1, 77.2, 77.0, 76.8, 71.1, 50.0, 36.1, 3.2. IR (Acetone) ν 879, 1068, 1139, 1170, 1320, 2980 cm<sup>-1</sup>. HRMS (ESI) calcd. for C<sub>19</sub>H<sub>20</sub>O<sub>2</sub>NS (M+H): 326.1209, Found: 326.1201.

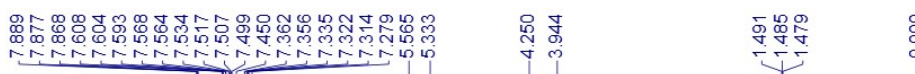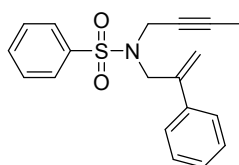

<sup>1</sup>H NMR (CDCl<sub>3</sub>, 400 MHz, TMS)

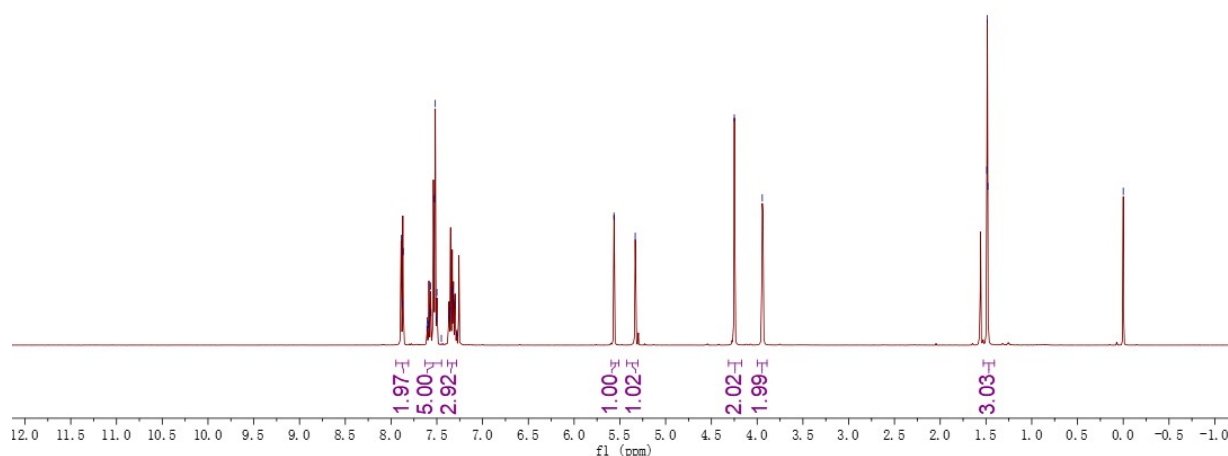

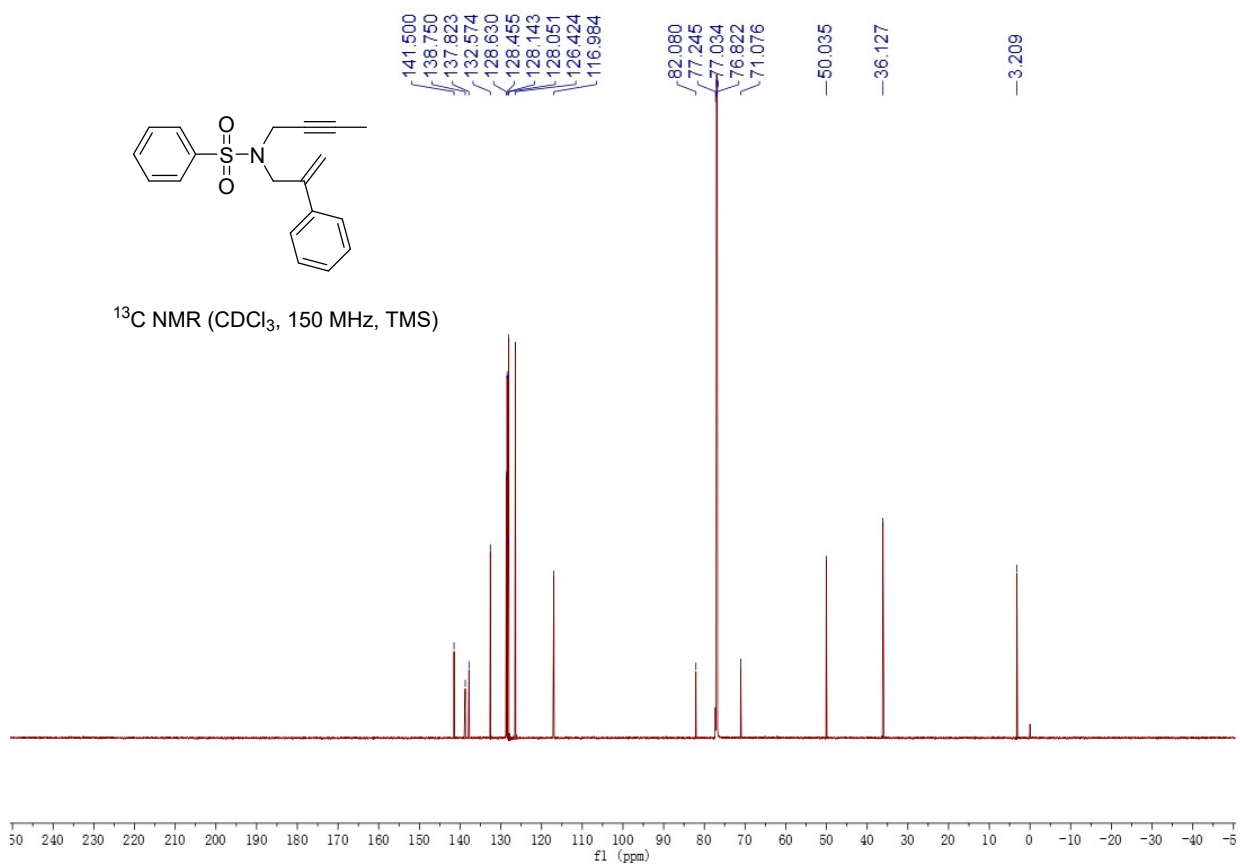

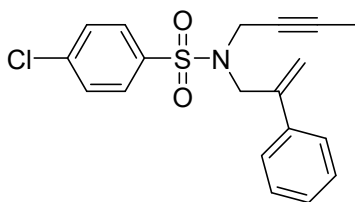

***N*-(but-2-yn-1-yl)-4-chloro-*N*-(2-phenylallyl)benzenesulfonamide (1t)**

A colorless oil, 41.7 mg, 70% yield.  $^1\text{H}$  NMR ( $\text{CDCl}_3$ , TMS, 400 MHz)  $\delta$  7.87 – 7.77 (m, 2H), 7.57 – 7.46 (m, 4H), 7.40 – 7.31 (m, 3H), 5.59 (s, 1H), 5.35 (s, 1H), 4.25 (s, 2H), 3.95 (s, 2H), 1.56 (t,  $J$  = 2.4 Hz, 3H).  $^{13}\text{C}$  NMR ( $\text{CDCl}_3$ , TMS, 150 MHz)  $\delta$  141.3, 139.1, 137.7, 137.3, 129.5, 128.9, 128.5, 128.2, 126.4, 117.2, 82.3, 71.1, 50.1, 36.1, 3.2. IR (Acetone)  $\nu$  917, 1058, 1140, 1158, 1339, 2278, 2902  $\text{cm}^{-1}$ . HRMS (ESI) calcd. for  $\text{C}_{19}\text{H}_{19}\text{O}_2\text{NCIS}$  ( $\text{M}+\text{H}$ ): 360.0820, Found: 360.0808.

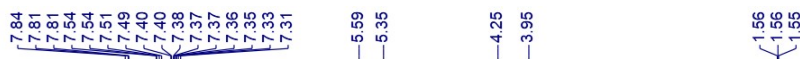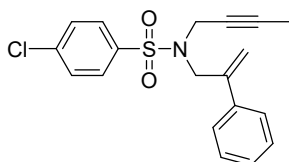

$^1\text{H}$  NMR ( $\text{CDCl}_3$ , 400 MHz, TMS)

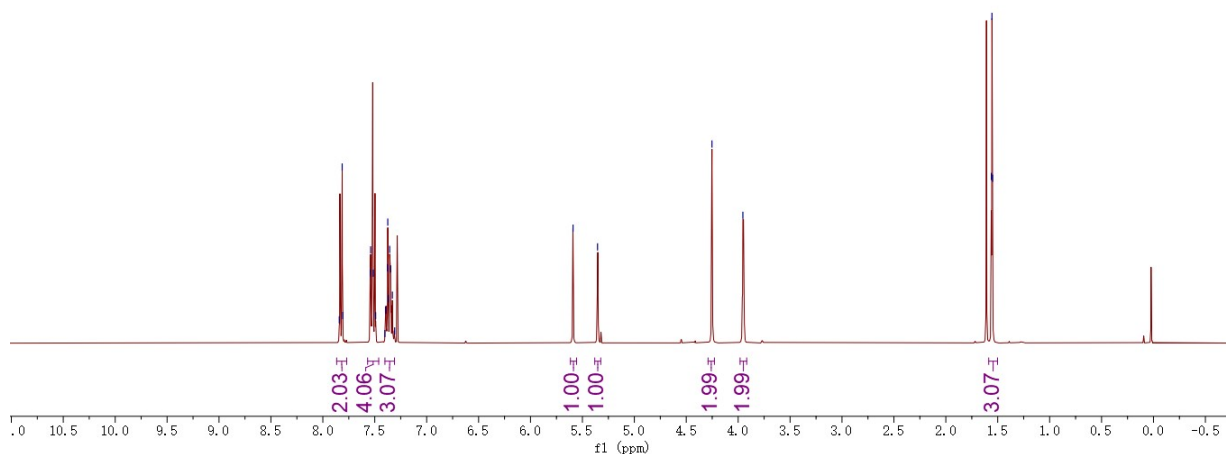

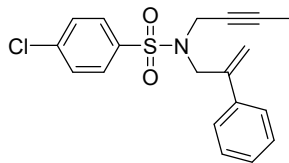

$^{13}\text{C}$  NMR ( $\text{CDCl}_3$ , 150 MHz, TMS)

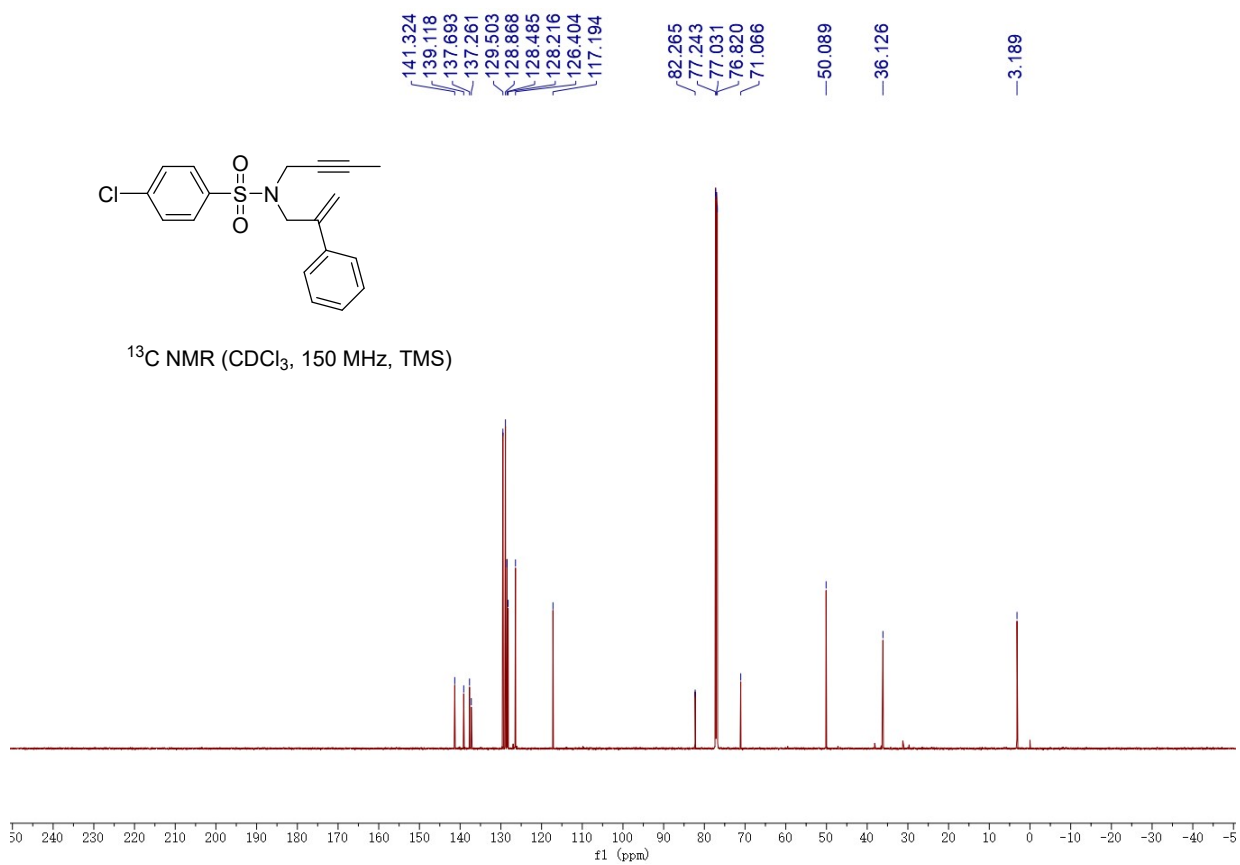



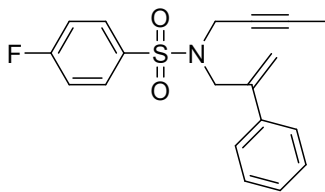

***N*-(but-2-yn-1-yl)-4-fluoro-*N*-(2-phenylallyl)benzenesulfonamide (1u)**

A colorless oil, 37.3 mg, 60% yield.  $^1\text{H}$  NMR ( $\text{CDCl}_3$ , TMS, 400 MHz)  $\delta$  7.96 – 7.86 (m, 2H), 7.54 (d,  $J = 8.5$  Hz, 2H), 7.42 – 7.28 (m, 3H), 7.21 (d,  $J = 15.4$  Hz, 2H), 5.59 (s, 1H), 5.36 (s, 1H), 4.25 (s, 2H), 3.96 (s, 2H), 1.56 (t,  $J = 2.4$  Hz, 3H).  $^{13}\text{C}$  NMR ( $\text{CDCl}_3$ , TMS, 150 MHz)  $\delta$  164.1 (d,  $J = 254.1$  Hz), 140.3, 136.7, 133.8 (d,  $J = 2.7$  Hz), 129.8 (d,  $J = 9.7$  Hz), 127.5, 127.2, 125.4, 116.1, 114.7 (d,  $J = 22.2$  Hz), 81.2, 70.1, 49.0, 35.1, 2.2.  $^{19}\text{F}$  NMR ( $\text{CDCl}_3$ , TMS, 564 MHz)  $\delta$  -105.5 (s). IR (Acetone)  $\nu$  815, 1033, 1187, 1199, 1281, 2230, 2970  $\text{cm}^{-1}$ . HRMS (ESI) calcd. for  $\text{C}_{19}\text{H}_{19}\text{O}_2\text{NFS}$  (M+H): 344.1115, Found: 344.1103.

7.932  
7.889  
7.881  
7.550  
7.529  
7.519  
7.398  
7.388  
7.370  
7.357  
7.347  
7.329  
7.314  
7.308  
7.241  
7.233  
7.195  
5.592  
5.356  
4.253  
3.963  
1.566  
1.560  
1.554  
0.023

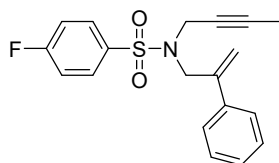

$^1\text{H}$  NMR ( $\text{CDCl}_3$ , 400 MHz, TMS)

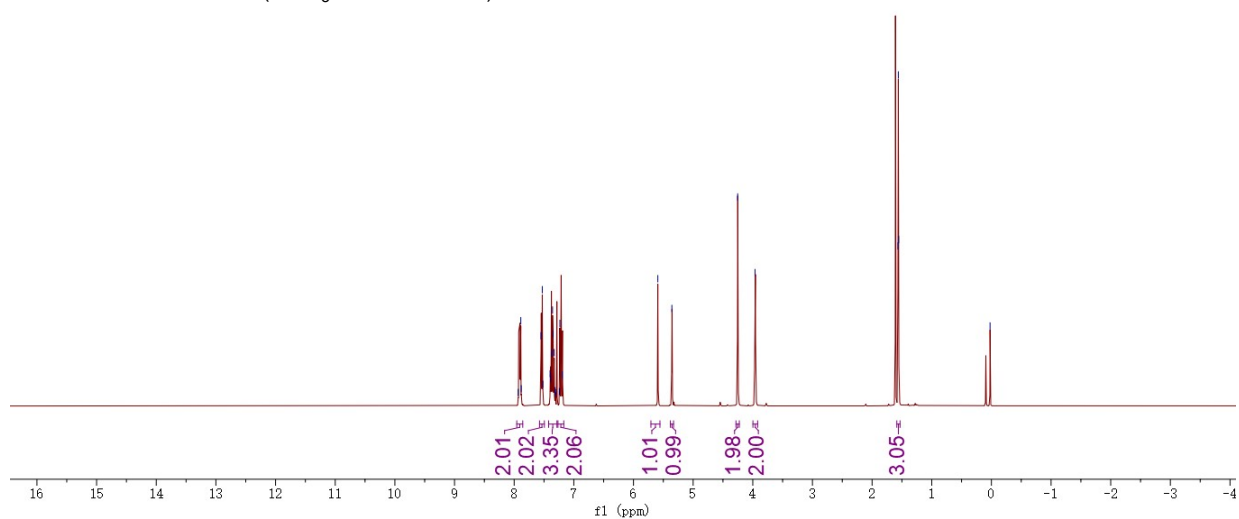

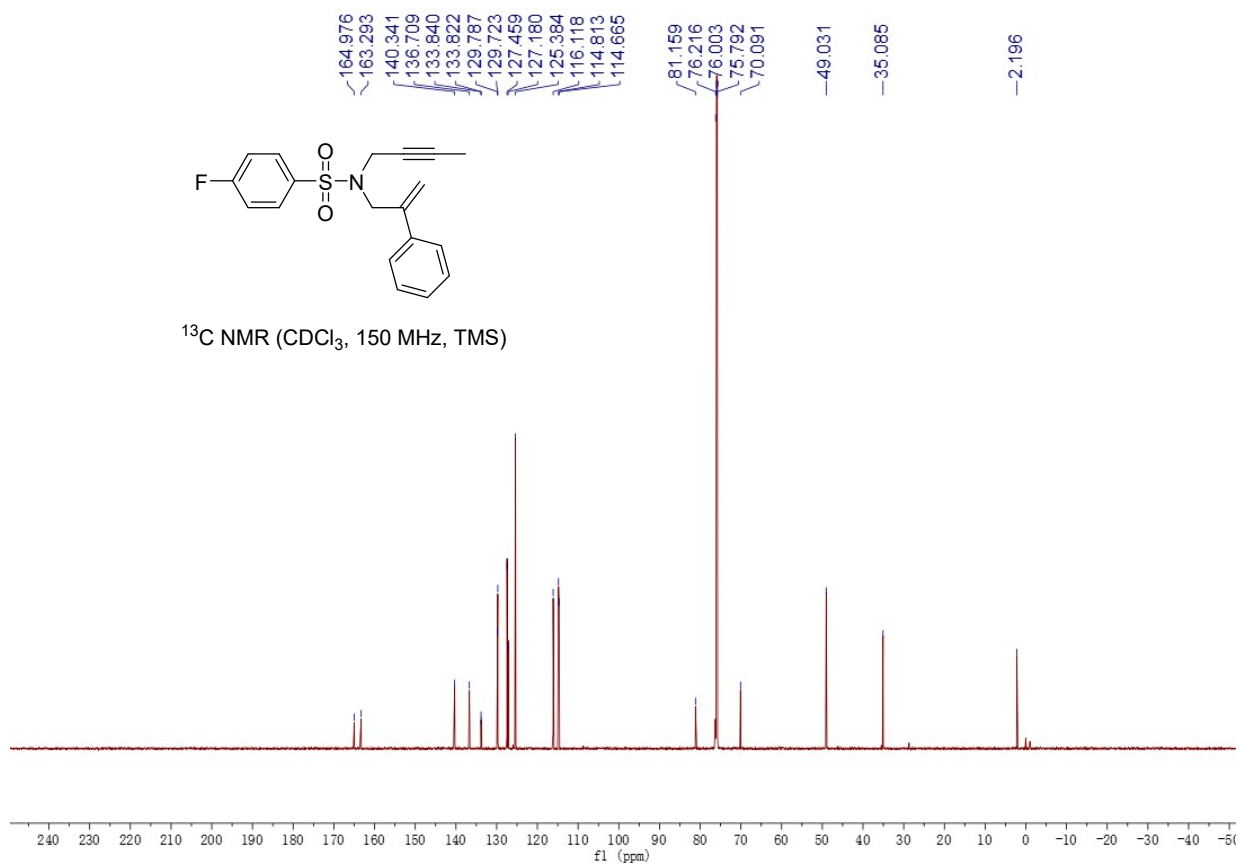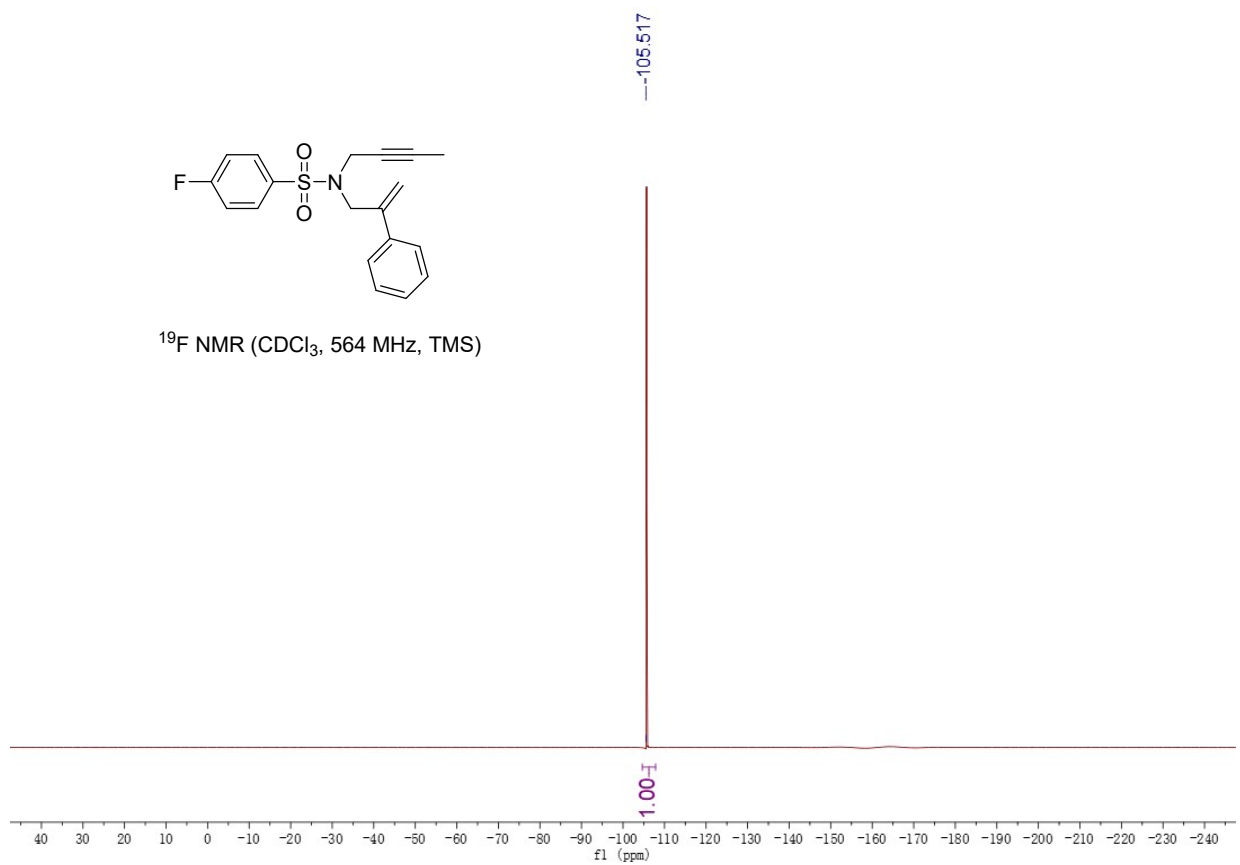

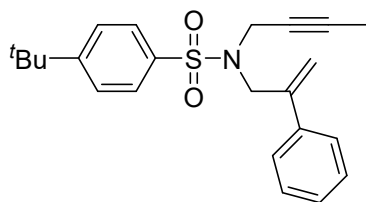

***N*-(but-2-yn-1-yl)-4-fluoro-*N*-(2-phenylallyl)benzenesulfonamide (1v)**

A colorless oil, 41.4 mg, 71% yield.  $^1\text{H}$  NMR ( $\text{CDCl}_3$ , TMS, 600 MHz)  $\delta$  7.72 (d,  $J = 8.5$  Hz, 2H), 7.48 – 7.42 (m, 4H), 7.30 – 7.20 (m, 3H), 5.49 (s, 1H), 5.27 (s, 1H), 4.18 (s, 2H), 3.86 (s, 2H), 1.40 (t,  $J = 2.4$  Hz, 3H), 1.28 (s, 9H).  $^{13}\text{C}$  NMR ( $\text{CDCl}_3$ , TMS, 150 MHz)  $\delta$  156.2, 141.6, 137.8, 135.7, 128.4, 128.1, 127.9, 126.4, 125.5, 116.9, 81.8, 71.2, 50.0, 36.0, 35.1, 31.1, 3.2. IR (Acetone)  $\nu$  857, 1053, 1156, 1298, 2238, 2909  $\text{cm}^{-1}$ . HRMS (ESI) calcd. for  $\text{C}_{23}\text{H}_{28}\text{O}_2\text{NS}$  ( $\text{M}+\text{H}$ ): 382.1835, Found: 382.1825.

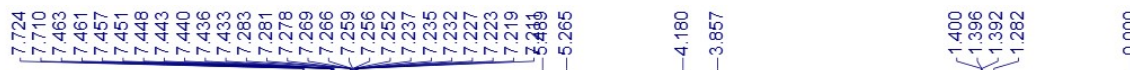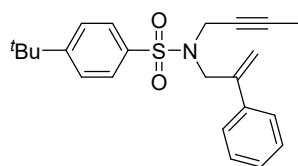

$^1\text{H}$  NMR ( $\text{CDCl}_3$ , 600 MHz, TMS)

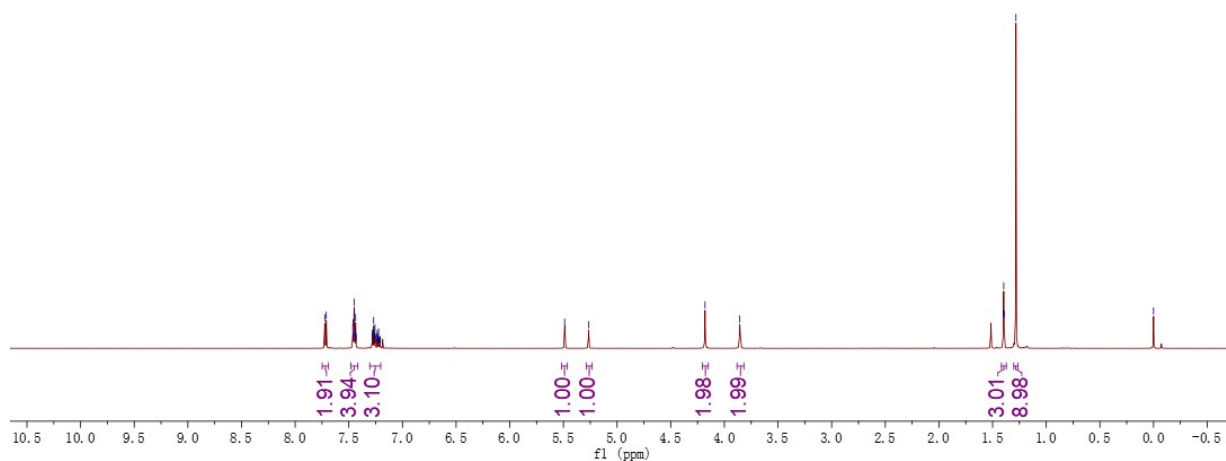

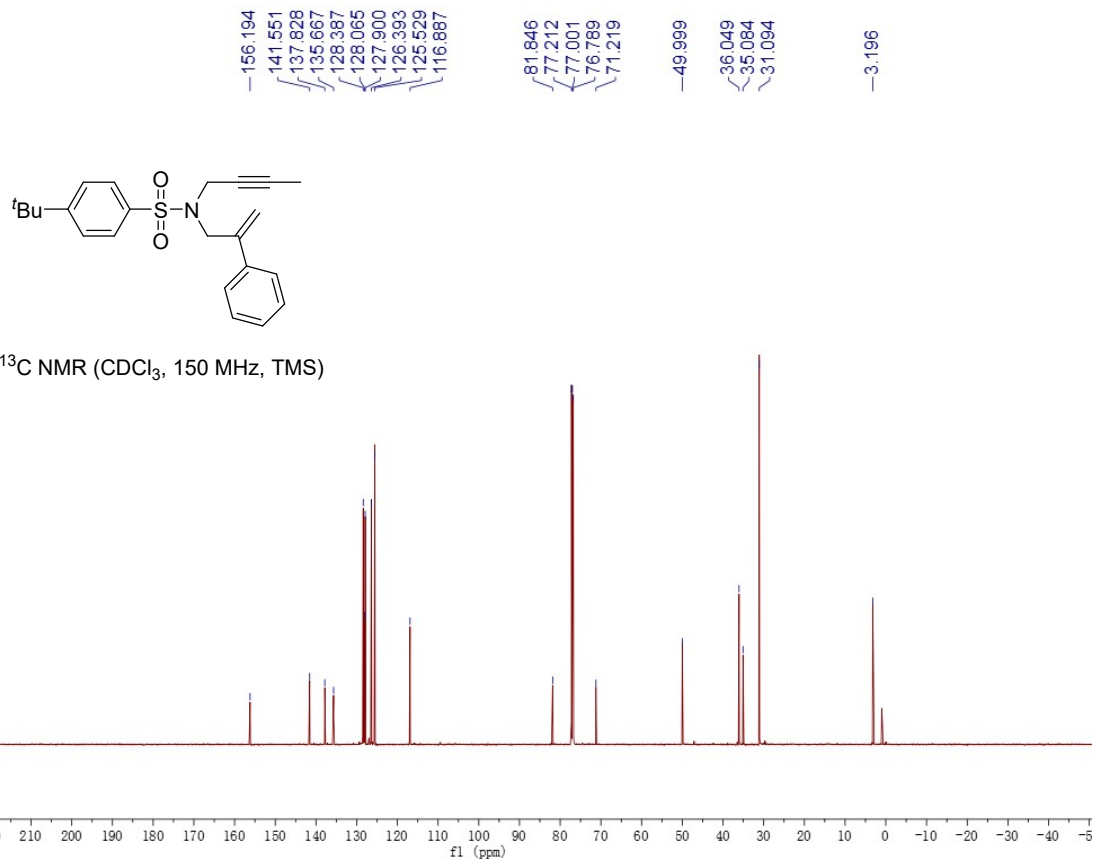

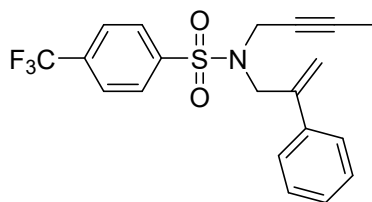

***N*-(but-2-yn-1-yl)-*N*-(2-phenylallyl)-4-(trifluoromethyl)benzenesulfonamide (1w)**

A colorless oil, 48.0 mg, 80% yield.  $^1\text{H}$  NMR ( $\text{CDCl}_3$ , TMS, 400 MHz)  $\delta$  8.00 (d,  $J = 8.2$  Hz, 2H), 7.78 (d,  $J = 8.2$  Hz, 2H), 7.54 – 7.47 (m, 2H), 7.39 – 7.31 (m, 3H), 5.58 (s, 1H), 5.34 (s, 1H), 4.27 (s, 2H), 3.95 (q,  $J = 2.4$  Hz, 2H), 1.46 (t,  $J = 2.4$  Hz, 3H).  $^{13}\text{C}$  NMR ( $\text{CDCl}_3$ , TMS, 150 MHz)  $\delta$  142.3, 141.2, 137.6, 134.6 (q,  $J = 33.0$  Hz), 128.6, 128.5, 128.3, 126.4, 125.7 (q,  $J = 3.0$  Hz), 123.3 (q,  $J = 271.5$  Hz), 117.4, 82.4, 70.7, 50.2, 36.2.  $^{19}\text{F}$  NMR ( $\text{CDCl}_3$ , TMS, 376 MHz)  $\delta$  -63.1 (s). IR (Acetone)  $\nu$  678, 962, 1031, 1186, 1311, 2160, 2990  $\text{cm}^{-1}$ . HRMS (ESI) calcd. for  $\text{C}_{20}\text{H}_{19}\text{O}_2\text{NF}_3\text{S}$  (M+H): 394.1083, Found: 394.1072.

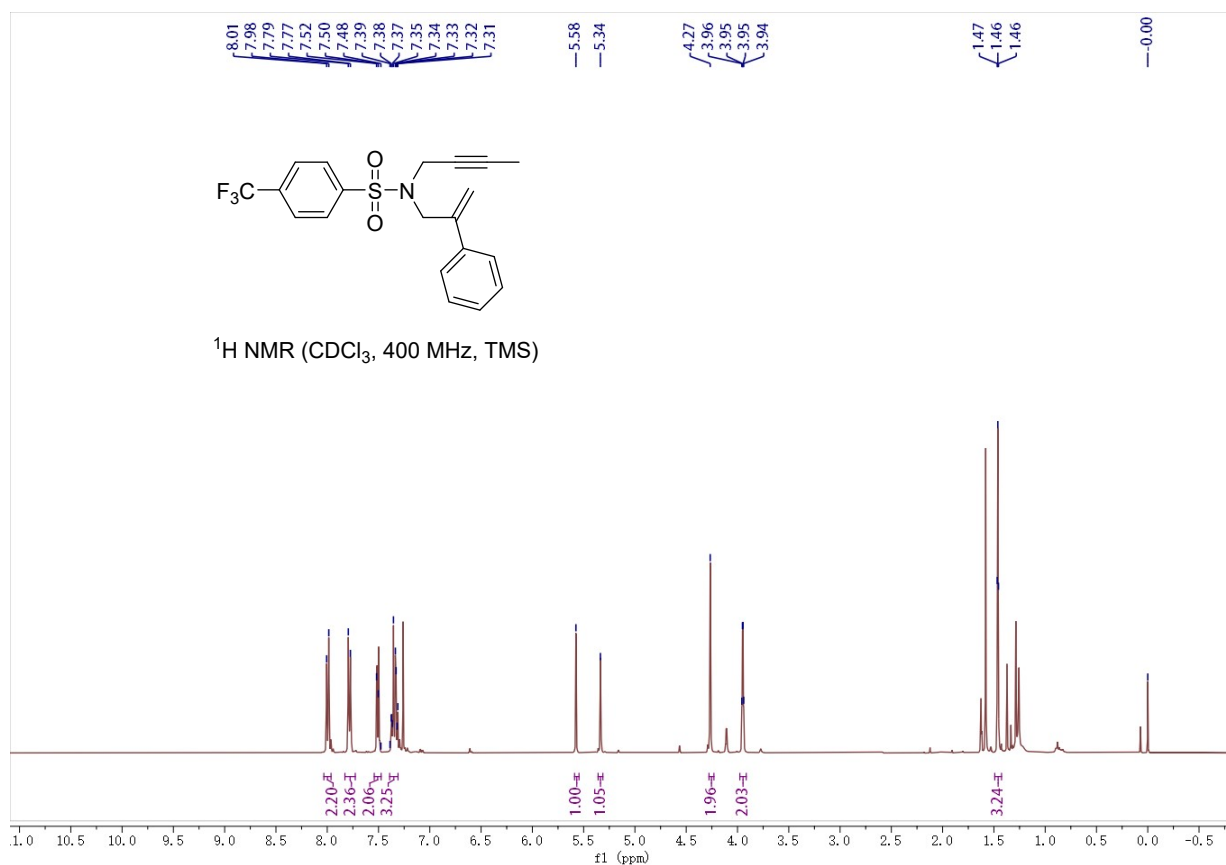

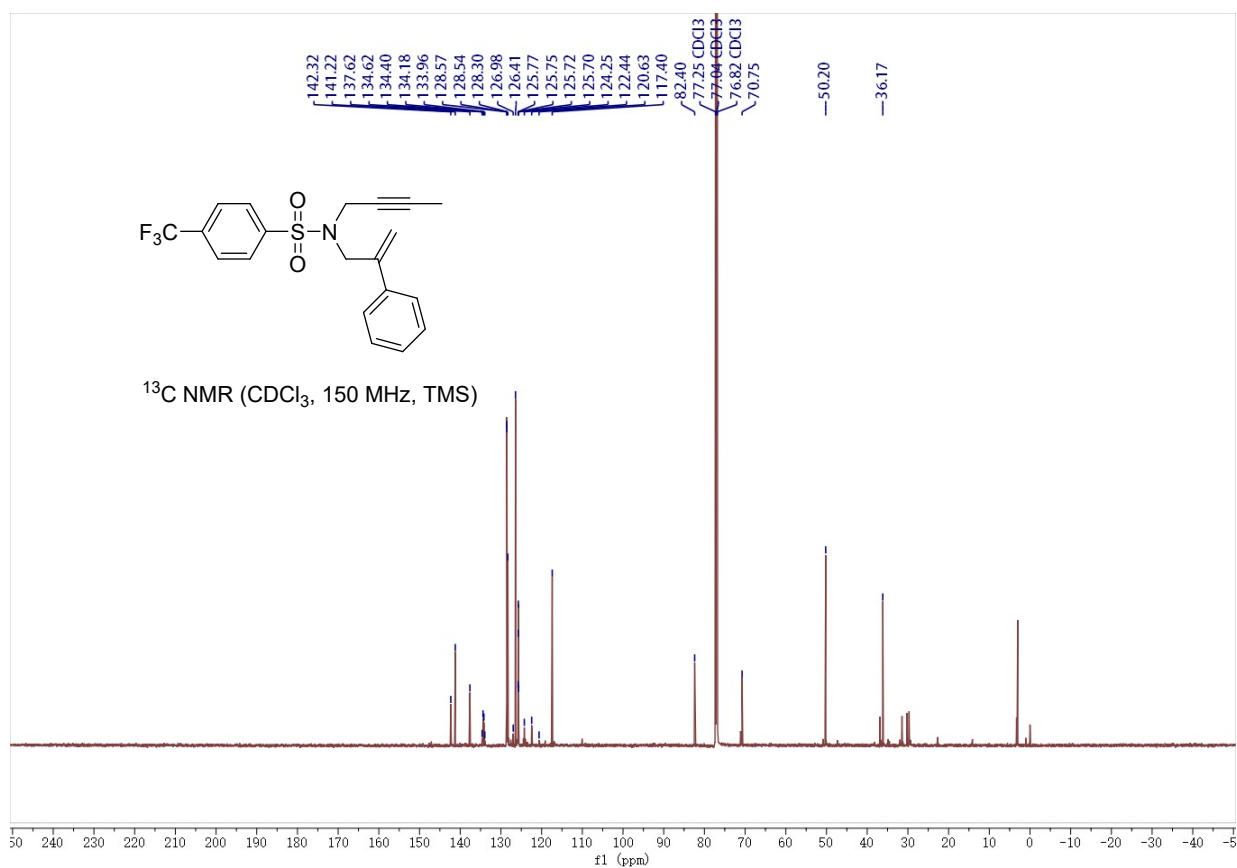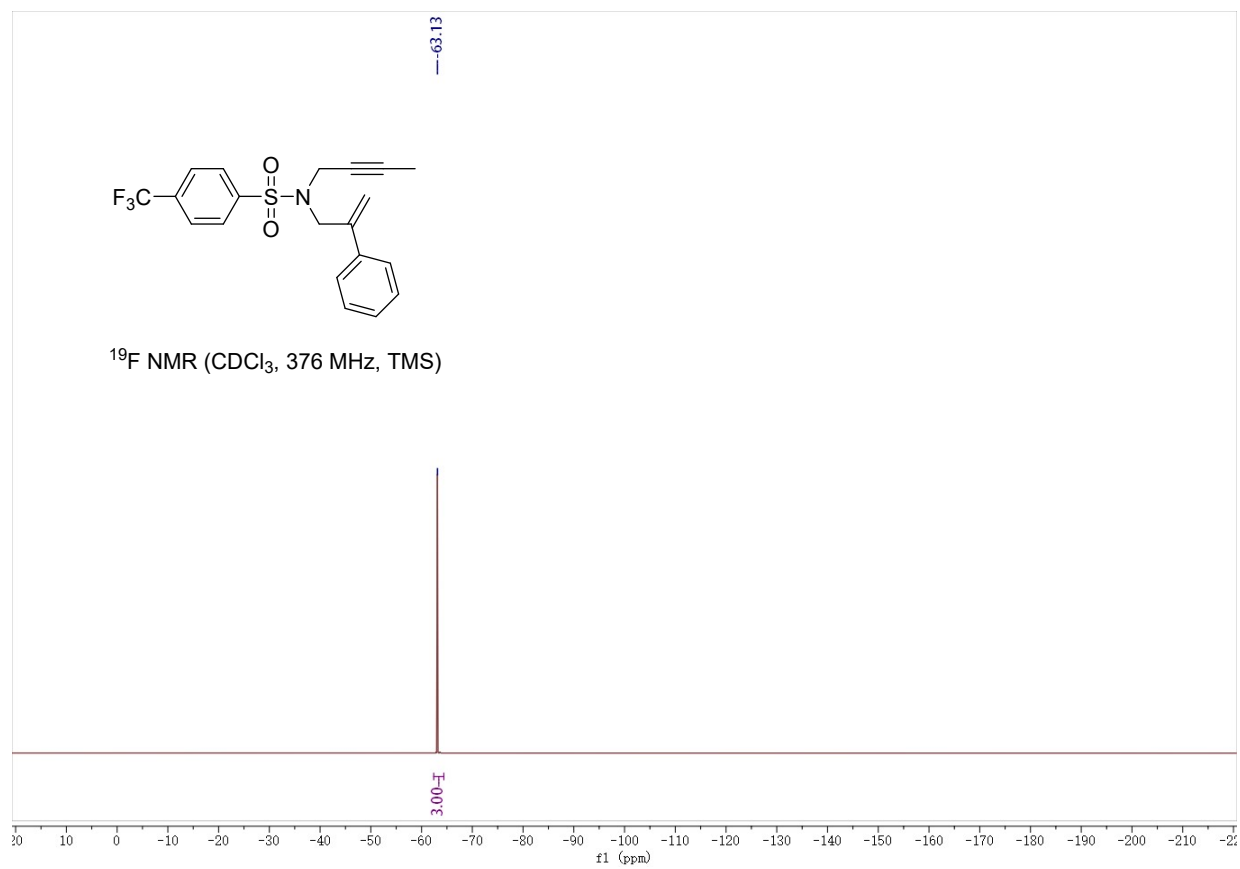

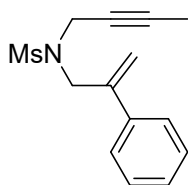

***N*-(but-2-yn-1-yl)-*N*-(2-phenylallyl)methanesulfonamide (1x)**

A colorless oil, 41% yield, 149.9 mg.  $^1\text{H}$  NMR ( $\text{CDCl}_3$ , TMS, 400 MHz)  $\delta$  7.47 – 7.42 (m, 2H), 7.32 – 7.20 (m, 3H), 5.53 (s, 1H), 5.34 (s, 1H), 4.25 (s, 2H), 3.86 (q,  $J = 2.4$  Hz, 2H), 2.87 (s, 3H), 1.79 (t,  $J = 2.4$  Hz, 3H).  $^{13}\text{C}$  NMR ( $\text{CDCl}_3$ , TMS, 100 MHz)  $\delta$  141.6, 137.7, 128.5, 128.2, 126.5, 116.9, 82.5, 72.2, 50.0, 38.0, 35.9, 3.5. IR (Acetone)  $\nu$  909, 1062, 1131, 1166, 1321, 2917  $\text{cm}^{-1}$ . HRMS (ESI) calcd. for  $\text{C}_{14}\text{H}_{18}\text{O}_2\text{NS}$  ( $\text{M}+\text{H}$ ): 264.1053, Found: 264.1043.

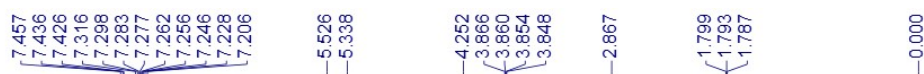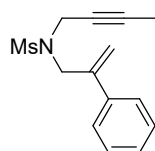

$^1\text{H}$  NMR ( $\text{CDCl}_3$ , 400 MHz, TMS)

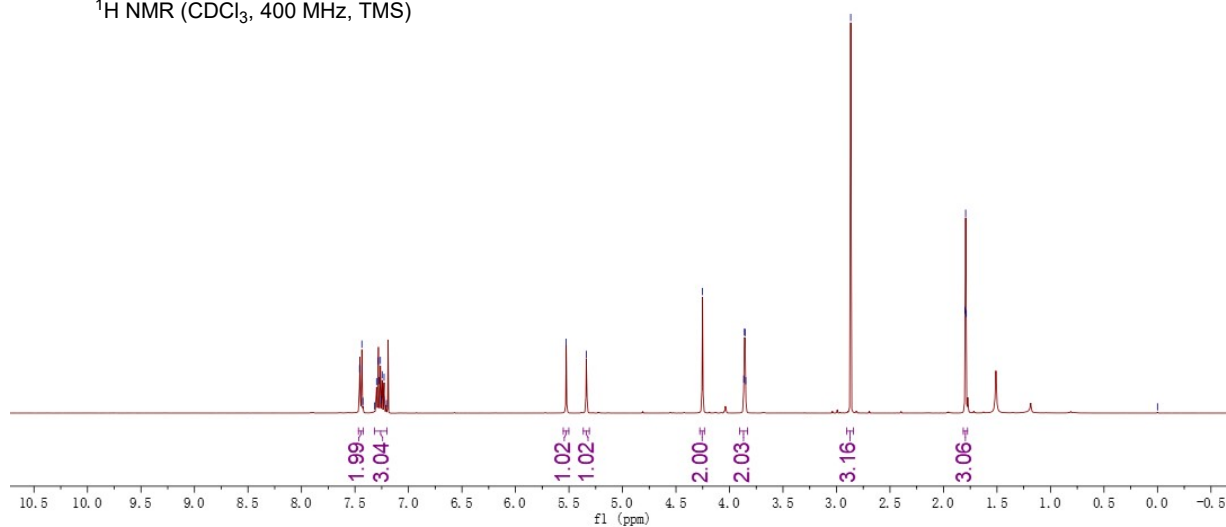

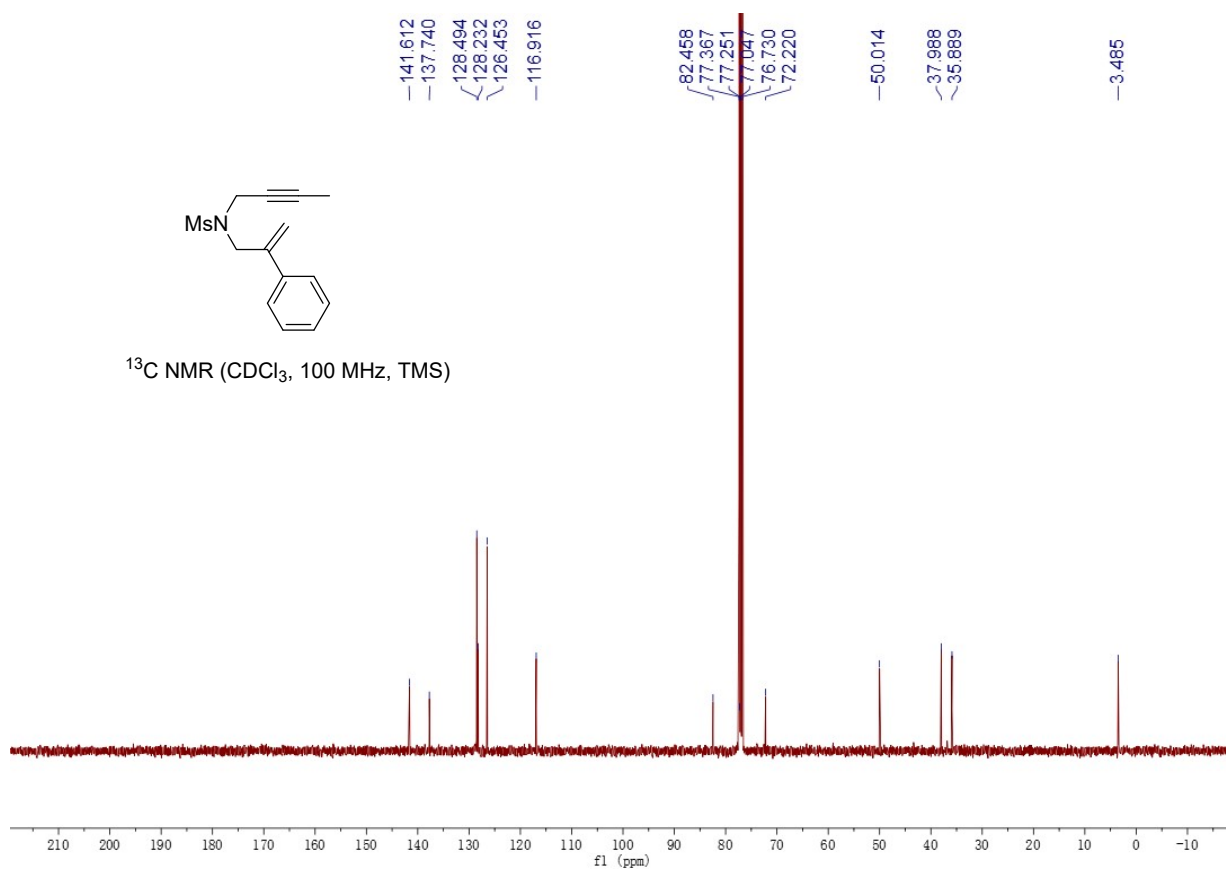



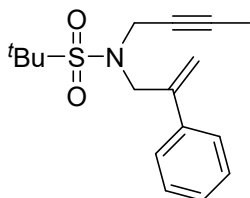

***N*-(but-2-yn-1-yl)-2-methyl-*N*-(2-phenylallyl)propane-2-sulfonamide (1y)**

A colorless oil, 36.5 mg, 63% yield.  $^1\text{H}$  NMR ( $\text{CDCl}_3$ , TMS, 400 MHz)  $\delta$  7.52 – 7.43 (m, 2H), 7.38 – 7.22 (m, 3H), 5.52 (s, 1H), 5.37 (s, 1H), 4.45 (s, 2H), 3.98 (s, 2H), 1.85 (t,  $J = 2.4$  Hz, 3H), 1.44 (s, 9H).  $^{13}\text{C}$  NMR ( $\text{CDCl}_3$ , TMS, 100 MHz)  $\delta$  142.3, 138.6, 128.2, 127.9, 126.5, 115.8, 81.7, 73.6, 62.0, 51.1, 36.8, 24.5, 3.3. IR (Acetone)  $\nu$  798, 905, 1181, 1308, 1742, 2909  $\text{cm}^{-1}$ . HRMS (ESI) calcd. for  $\text{C}_{17}\text{H}_{24}\text{O}_2\text{NS}$  ( $\text{M}+\text{H}$ ): 306.1522, Found: 306.1512.

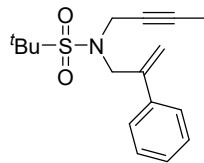

<sup>1</sup>H NMR (CDCl<sub>3</sub>, 400 MHz, TMS)

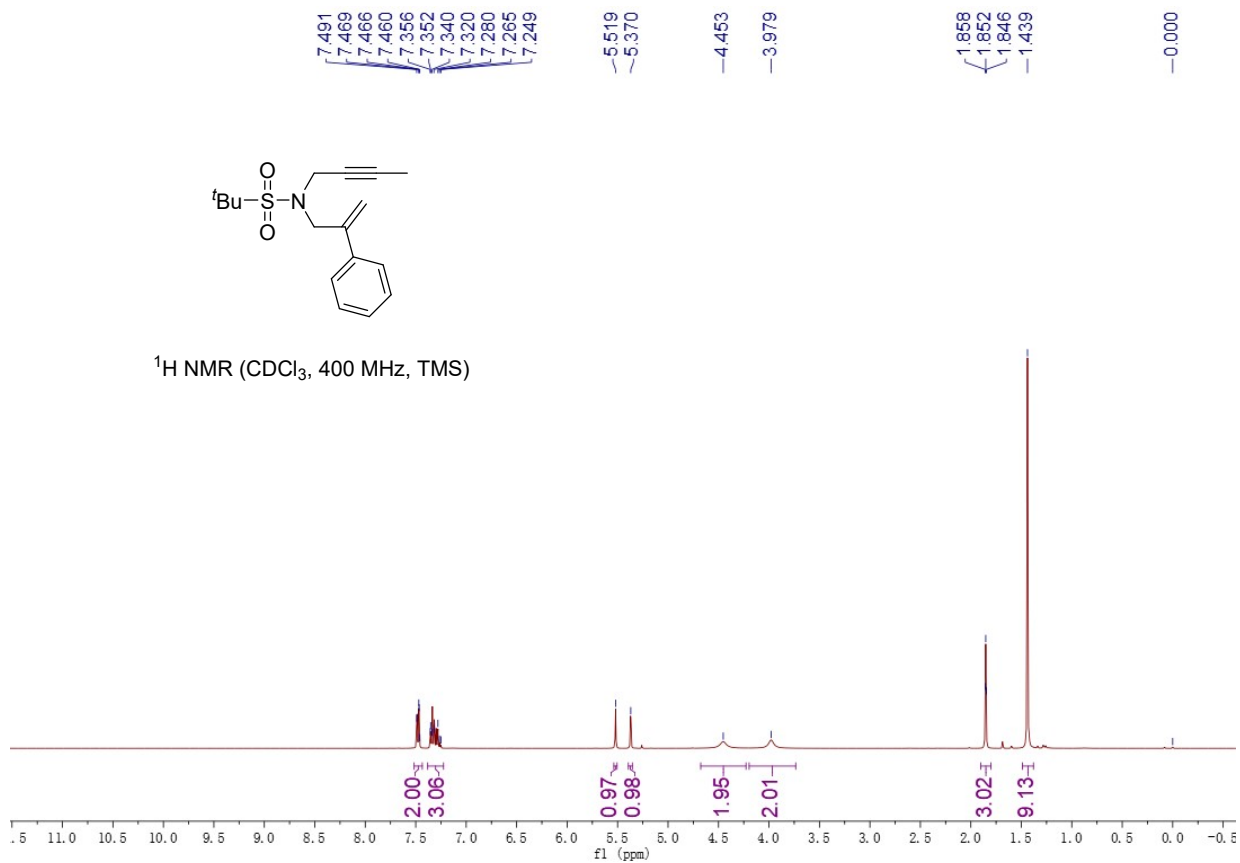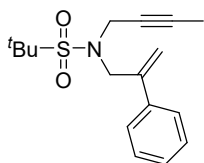

<sup>13</sup>C NMR (CDCl<sub>3</sub>, 100 MHz, TMS)

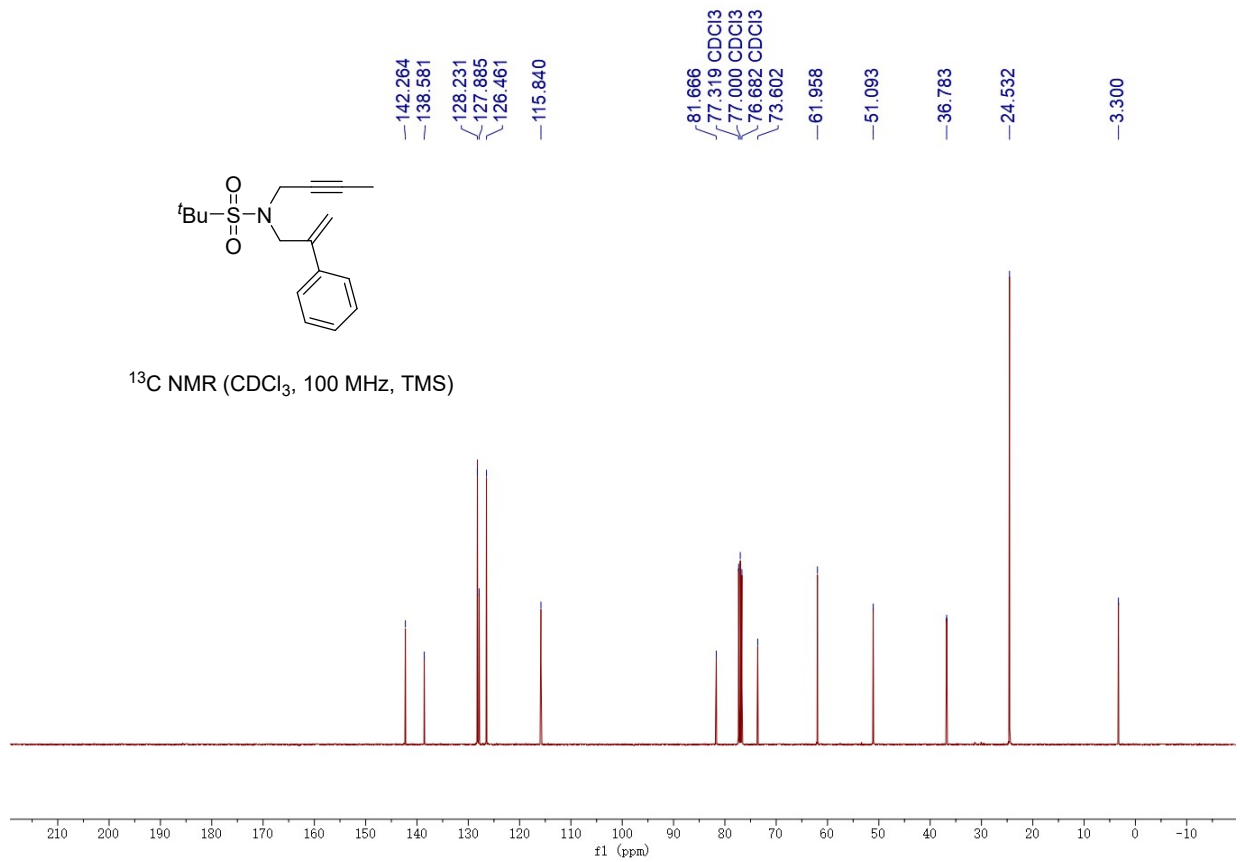

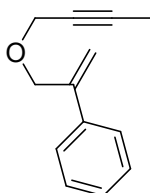

**(3-(but-2-yn-1-yloxy)prop-1-en-2-yl)benzene (1z)**

This is a known compound and its spectroscopic data are consistent with those reported in the previous literature,<sup>[8]</sup> 102.5 mg, 55% yield. <sup>1</sup>H NMR (CDCl<sub>3</sub>, TMS, 400 MHz) δ 7.24 – 7.49 (m, 5H), 5.55 (s, 1H), 5.36 (s, 1H), 4.45 (s, 2H), 4.15 (q, *J* = 2.4 Hz, 2H), 1.87 (t, *J* = 2.4 Hz, 3H). <sup>13</sup>C NMR (CDCl<sub>3</sub>, TMS, 100 MHz) δ 143.5, 138.5, 128.2, 127.7, 125.9, 114.9, 82.6, 75.0, 71.2, 57.6, 3.8.

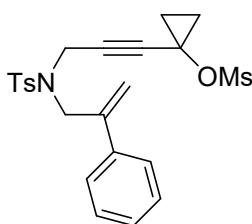

**1-(3-(((4-methyl-*N*-(2-phenylallyl)phenyl)sulfonamido)prop-1-yn-1-yl)cyclopropyl methanesulfonate (1ab)**

A colorless oil, 36.6 mg, 57% yield. <sup>1</sup>H NMR (CDCl<sub>3</sub>, TMS, 400 MHz) δ 7.71 (d, *J* = 8.3 Hz, 2H), 7.52 – 7.46 (m, 2H), 7.34 – 7.28 (m, 5H), 5.58 (s, 1H), 5.36 (s, 1H), 4.27 (s, 2H), 4.02 (s, 2H), 3.00 (s, 3H), 2.45 (s, 3H), 1.45 – 1.37 (m, 2H), 0.87 – 0.79 (m, 2H). <sup>13</sup>C NMR (CDCl<sub>3</sub>, TMS, 150 MHz) δ 143.9, 141.4, 137.5, 135.7, 129.7, 128.6, 128.3, 127.9, 126.4, 117.4, 83.0, 79.0, 53.3, 50.3, 39.6, 35.7, 21.6, 16.4. IR (Acetone) ν 704, 778, 895, 1150, 1326, 2925 cm<sup>-1</sup>. HRMS (ESI) calcd. for C<sub>23</sub>H<sub>26</sub>O<sub>5</sub>NS<sub>2</sub> (M+H): 460.1247, Found: 460.1235.

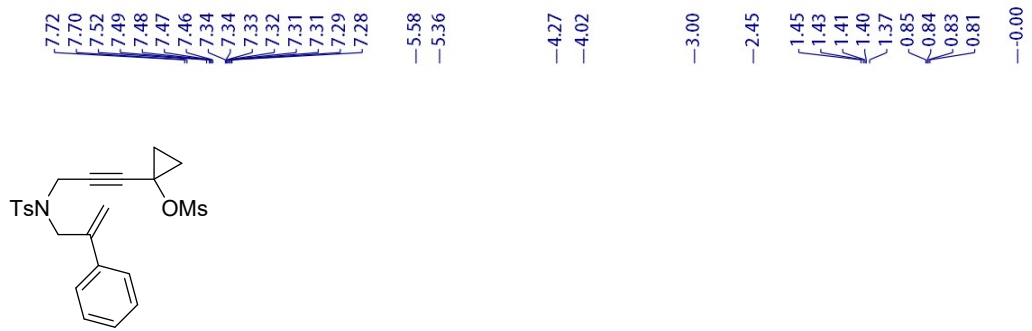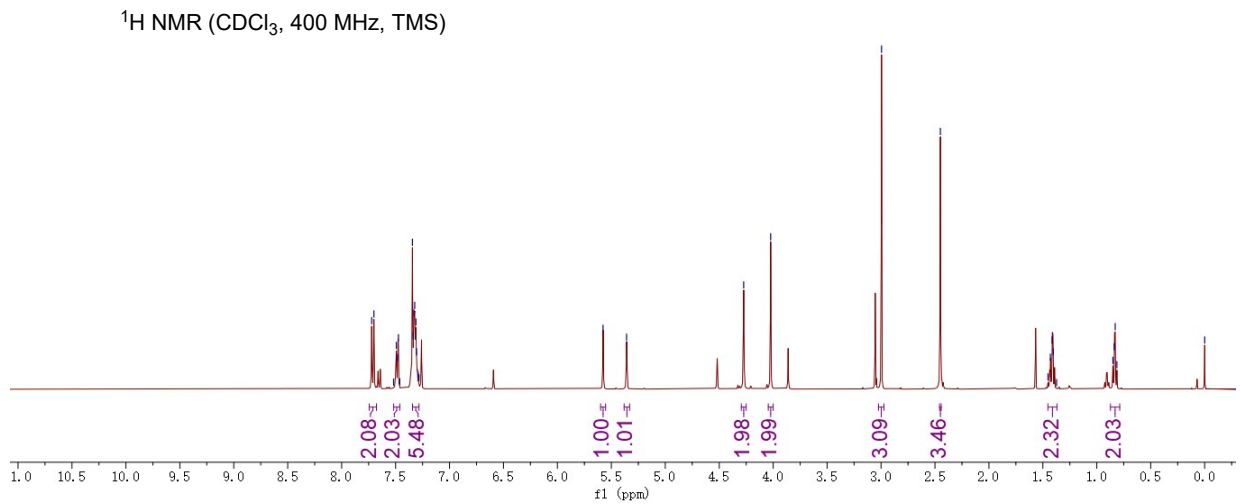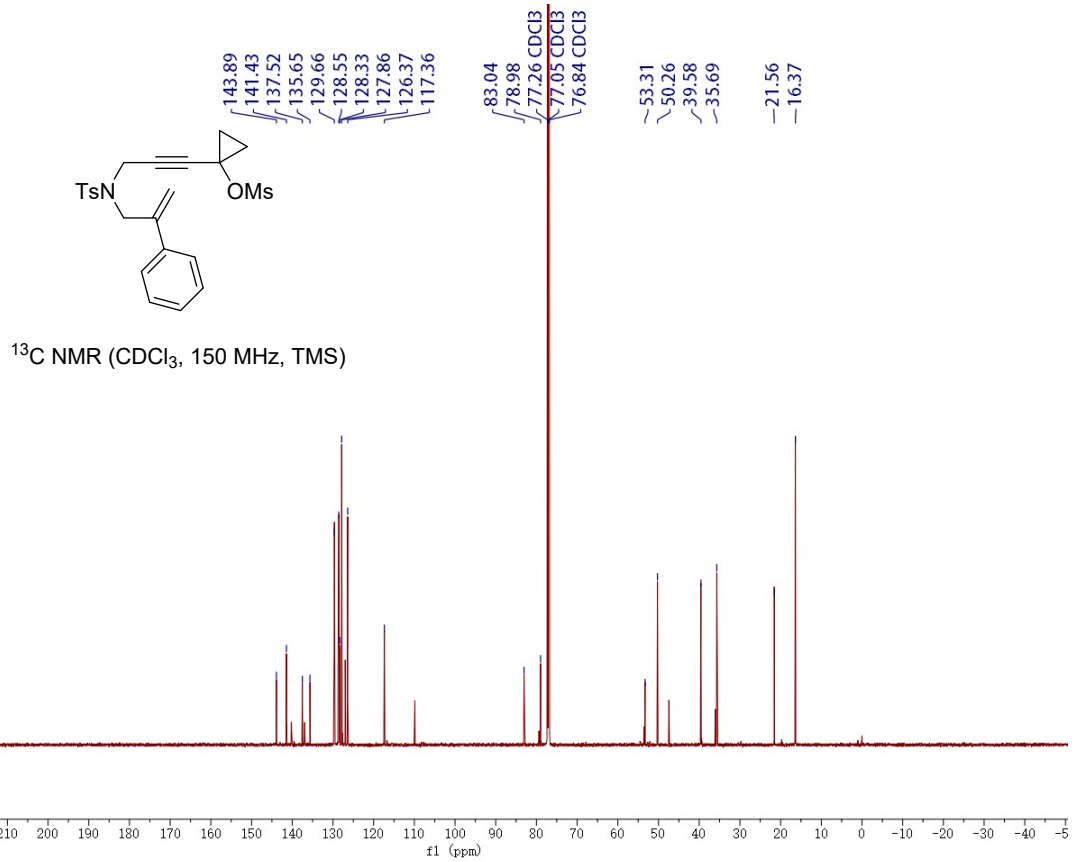

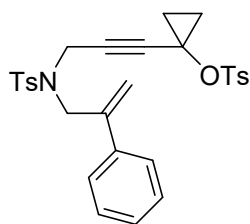

**1-(3-((4-methyl-N-(2-phenylallyl)phenyl)sulfonamido)prop-1-yn-1-yl)cyclopropyl-4-methylbenzenesulfonate (1ac)**

A colorless oil, 35.3 mg, 61% yield.  $^1\text{H}$  NMR ( $\text{CDCl}_3$ , TMS, 400 MHz)  $\delta$  7.80 – 7.75 (m, 2H), 7.70 – 7.65 (m, 2H), 7.55 – 7.51 (m, 2H), 7.39 – 7.31 (m, 7H), 5.58 (s, 1H), 5.31 (s, 1H), 4.18 (s, 2H), 3.82 (s, 2H), 2.46 – 2.43 (m, 6H), 1.35 – 1.30 (m, 2H), 0.76 – 0.67 (m, 2H).  $^{13}\text{C}$  NMR ( $\text{CDCl}_3$ , TMS, 150 MHz)  $\delta$  145.1, 143.7, 141.1, 137.5, 135.5, 134.3, 129.6, 129.5, 128.5, 128.3, 127.9, 126.4, 117.3, 83.2, 78.2, 53.2, 50.1, 35.7, 21.7, 21.5, 16.1. IR (Acetone)  $\nu$  1089, 1162, 1174, 1348, 1368, 2990  $\text{cm}^{-1}$ . HRMS (ESI) calcd. for  $\text{C}_{29}\text{H}_{30}\text{O}_5\text{NS}_2$  (M+H): 536.1560, Found: 536.1548.

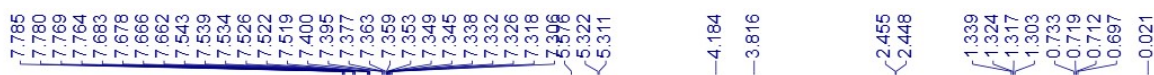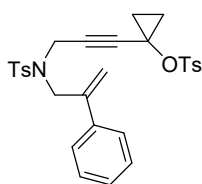

$^1\text{H}$  NMR ( $\text{CDCl}_3$ , 400 MHz, TMS)

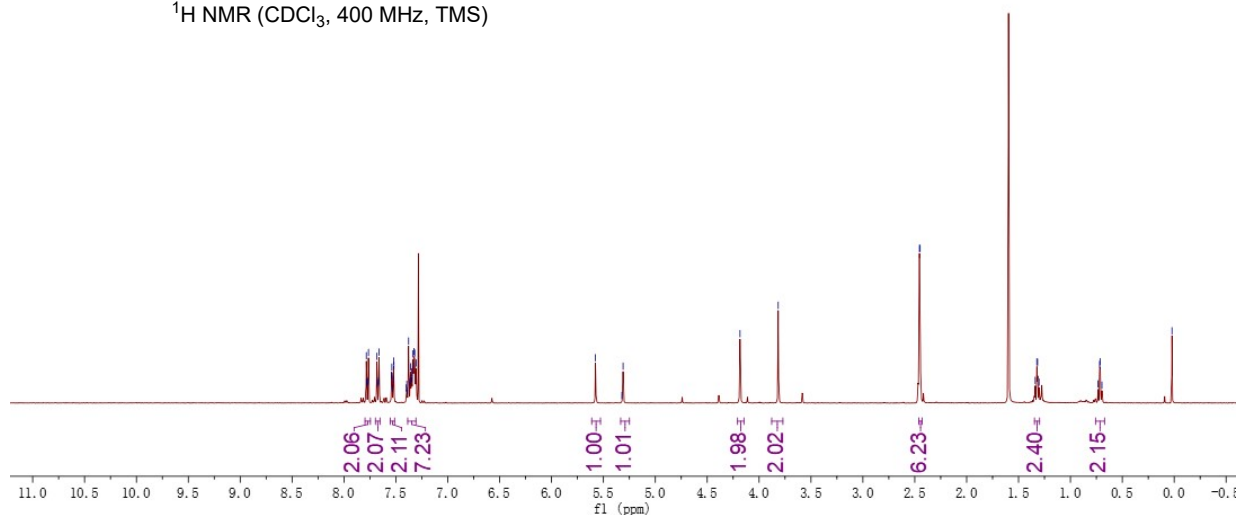

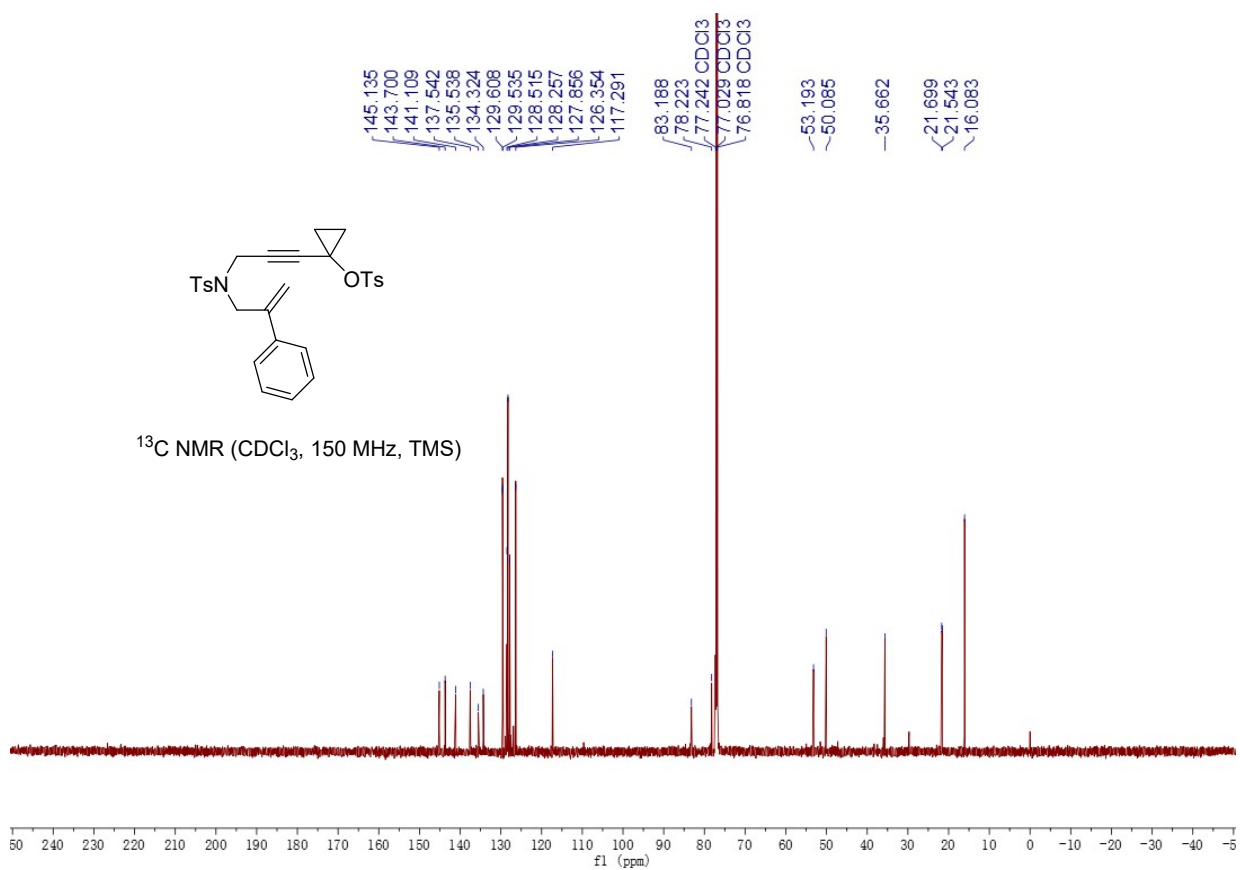

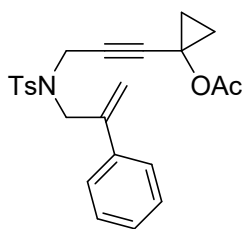

**1-(3-((4-methyl-N-(2-phenylallyl)phenyl)sulfonamido)prop-1-yn-1-yl)cyclopropyl acetate (1ad)**

A colorless oil, 35.3 mg, 61% yield.  $^1\text{H}$  NMR ( $\text{CDCl}_3$ , TMS, 400 MHz)  $\delta$  7.73 (d,  $J = 8.3$  Hz, 2H), 7.57 – 7.49 (m, 2H), 7.39 – 7.27 (m, 5H), 5.57 (s, 1H), 5.36 (s, 1H), 4.25 (s, 2H), 4.00 (s, 2H), 2.45 (s, 3H), 1.97 (s, 3H), 1.01 – 0.93 (m, 2H), 0.79 – 0.69 (m, 2H).  $^{13}\text{C}$  NMR ( $\text{CDCl}_3$ , TMS, 150 MHz)  $\delta$  169.8, 143.4, 141.2, 137.7, 135.8, 129.5, 128.5, 128.1, 128.0, 126.4, 117.4, 84.9, 75.3, 50.0, 47.5, 35.9, 21.6, 20.9, 15.6. IR (Acetone)  $\nu$  1010, 1285, 1370, 2239, 3008  $\text{cm}^{-1}$ . HRMS (ESI) calcd. for  $\text{C}_{24}\text{H}_{26}\text{O}_4\text{NS}$  (M+H): 424.1577, Found: 424.1564.

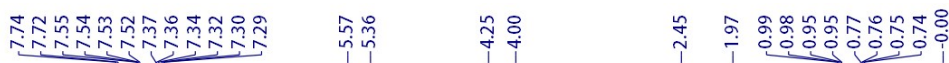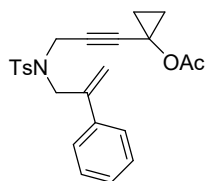

$^1\text{H}$  NMR ( $\text{CDCl}_3$ , 400 MHz, TMS)

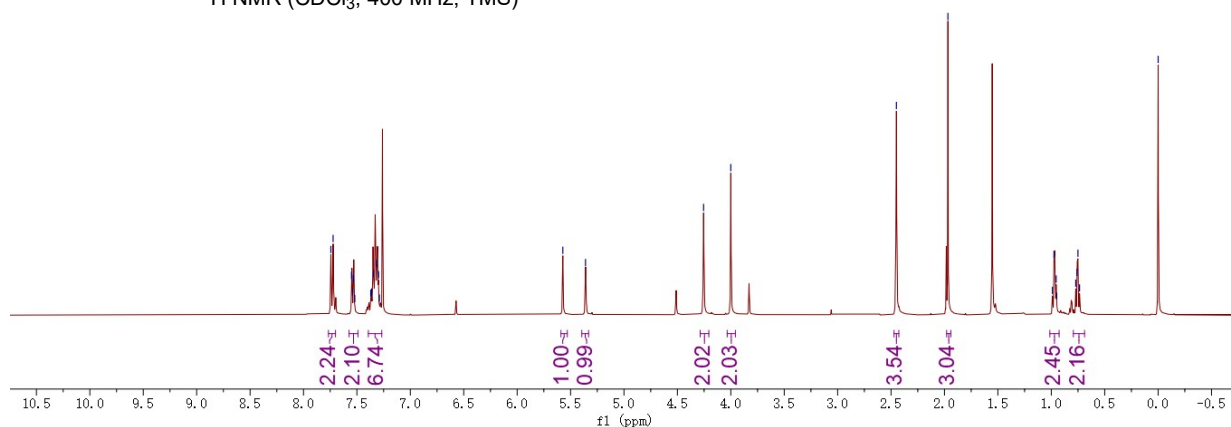

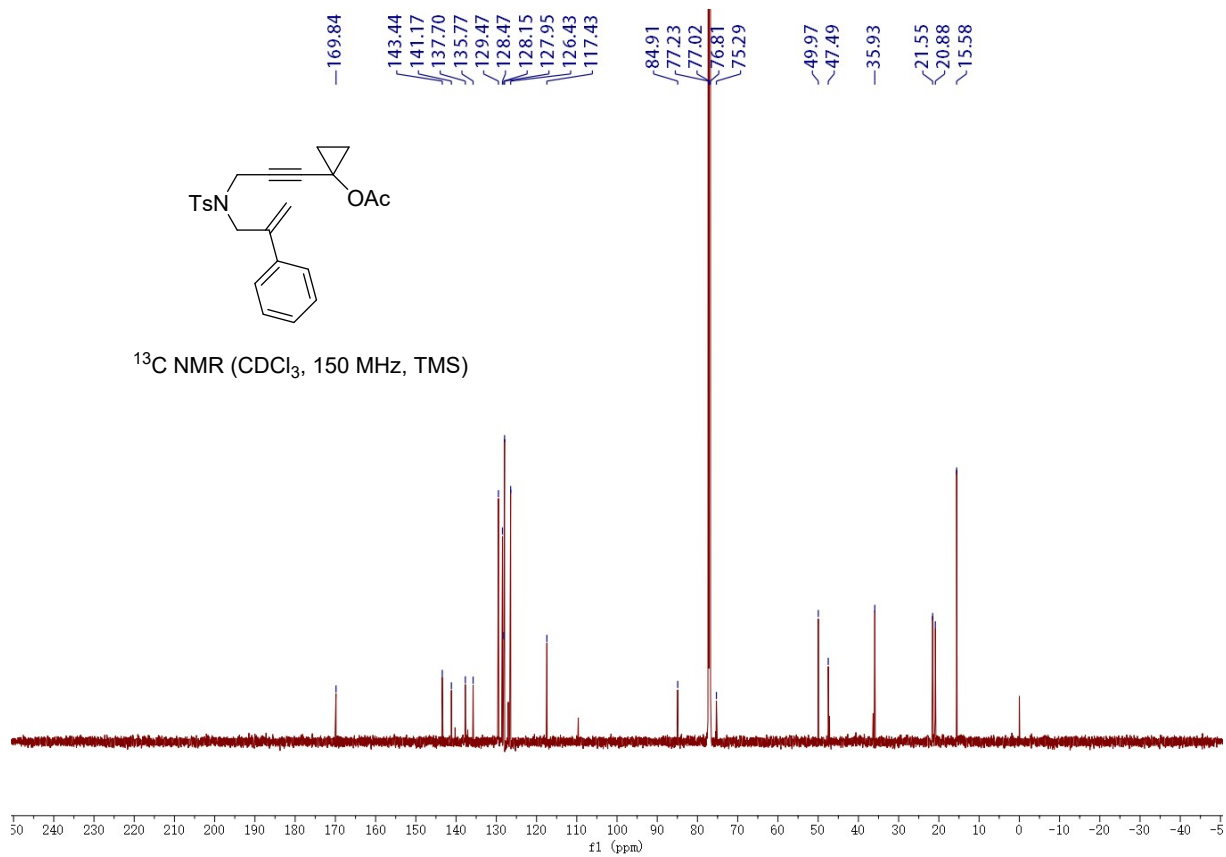



## 9. Spectroscopic data of products 3, 4, 5

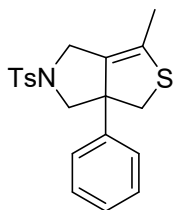

### 3-methyl-6a-phenyl-5-tosyl-4,5,6,6a-tetrahydro-1H-thieno[3,4-c]pyrrole (3a)

A colorless oil, 34.5 mg, 95% yield.  $^1\text{H}$  NMR ( $\text{CDCl}_3$ , TMS, 400 MHz)  $\delta$  7.47 (d,  $J = 8.2$  Hz, 2H), 7.26 – 7.17 (m, 5H), 7.12 (d,  $J = 8.0$  Hz, 2H), 4.09 (d,  $J = 9.6$  Hz, 1H), 3.90 (d,  $J = 13.3$  Hz, 1H), 3.74 (d,  $J = 13.2$  Hz, 1H), 3.68 (d,  $J = 11.0$  Hz, 1H), 3.39 (d,  $J = 9.7$  Hz, 1H), 3.01 (d,  $J = 10.9$  Hz, 1H), 2.37 (s, 3H), 1.93 (s, 3H).  $^{13}\text{C}$  NMR ( $\text{CDCl}_3$ , TMS, 100 MHz)  $\delta$  143.3, 141.3, 133.8, 131.8, 131.6, 129.5, 128.7, 127.14, 127.08, 126.0, 66.2, 60.5, 46.1, 46.0, 21.4, 14.8. IR (Acetone)  $\nu$  615, 1052, 1134, 1388, 3006  $\text{cm}^{-1}$ . HRMS (ESI) calcd. for  $\text{C}_{20}\text{H}_{22}\text{O}_2\text{NS}_2$  (M+H): 372.1086, Found: 372.1075.

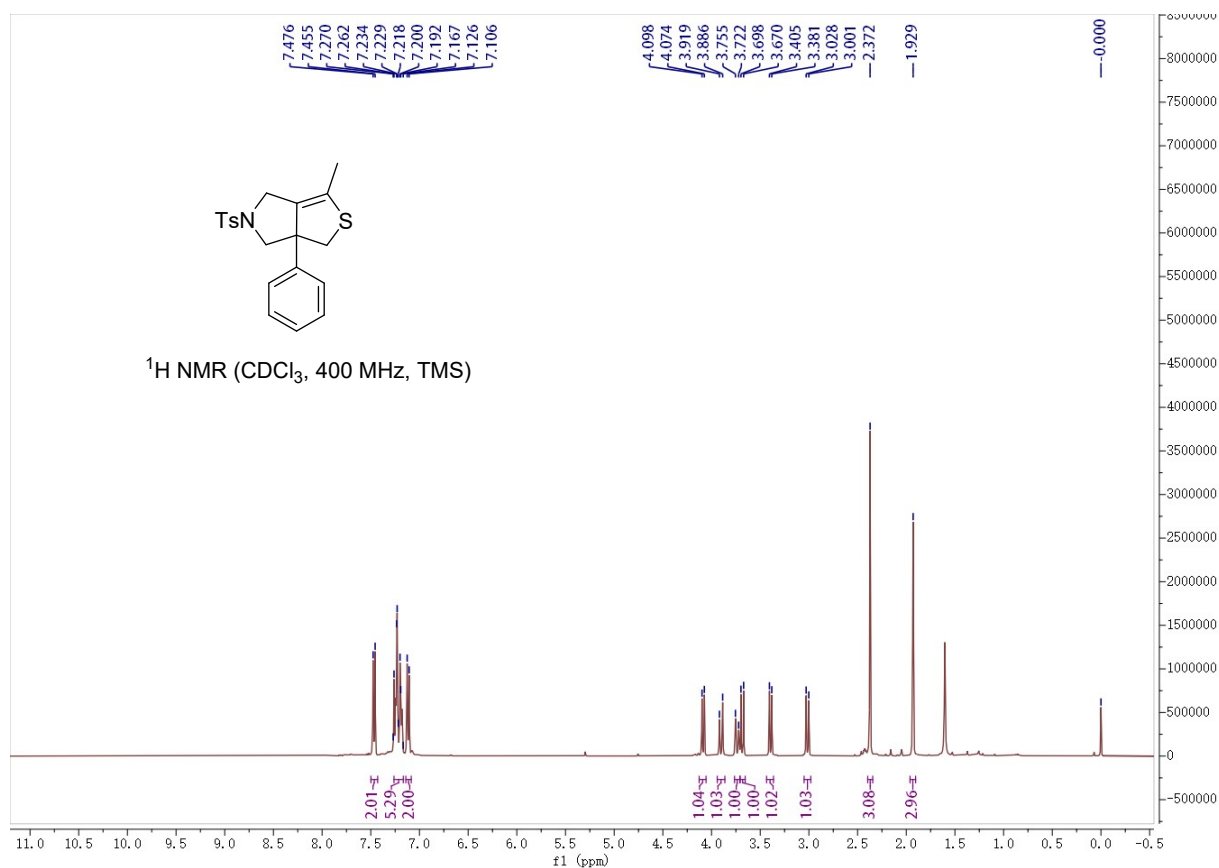

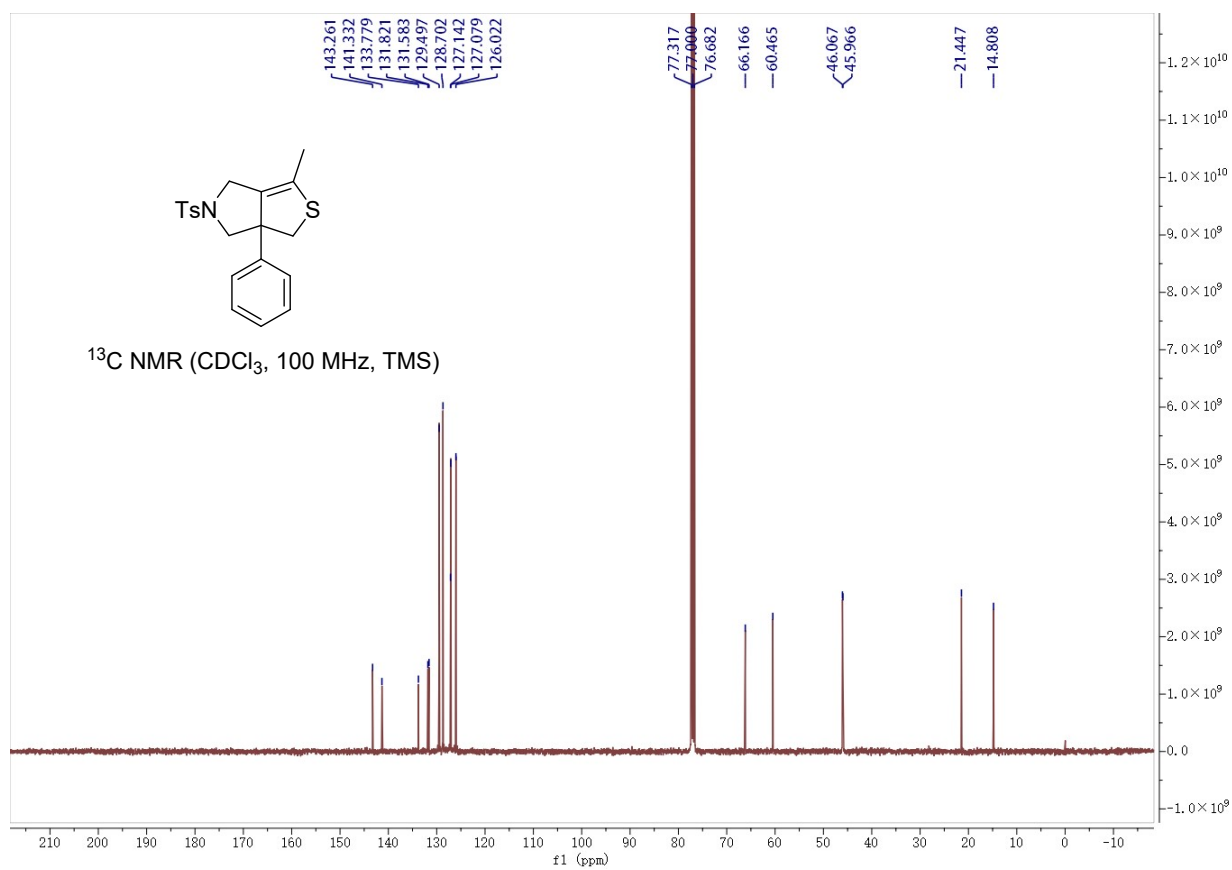

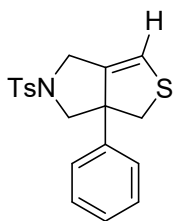

**6a-phenyl-5-tosyl-4,5,6,6a-tetrahydro-1H-thieno[3,4-c]pyrrole (3b)**

A colorless oil, 21.5 mg, 60% yield.  $^1\text{H}$  NMR ( $\text{CDCl}_3$ , TMS, 400 MHz)  $\delta$  7.48 (d,  $J = 8.2$  Hz, 2H), 7.30 – 7.20 (m, 5H), 7.13 (d,  $J = 8.0$  Hz, 2H), 6.13 (s, 1H), 4.15 (d,  $J = 9.6$  Hz, 1H), 3.93 (d,  $J = 13.7$  Hz, 1H), 3.84 (dd,  $J = 13.8, 2.2$  Hz, 1H), 3.64 (d,  $J = 11.0$  Hz, 1H), 3.37 (d,  $J = 9.6$  Hz, 1H), 3.08 (d,  $J = 11.0$  Hz, 1H), 2.37 (s, 3H).  $^{13}\text{C}$  NMR ( $\text{CDCl}_3$ , TMS, 150 MHz)  $\delta$  143.4, 140.4, 138.2, 133.6, 129.5, 128.8, 127.3, 127.1, 126.0, 119.9, 65.5, 60.1, 46.7, 46.2, 21.4. IR (Acetone)  $\nu$  665, 1161, 1344, 1710, 2979  $\text{cm}^{-1}$ . HRMS (ESI) calcd. for  $\text{C}_{19}\text{H}_{20}\text{O}_2\text{NS}_2$  (M+H): 358.0930, Found: 358.0916.

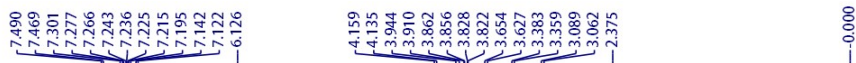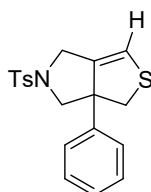

$^1\text{H}$  NMR ( $\text{CDCl}_3$ , 400 MHz, TMS)

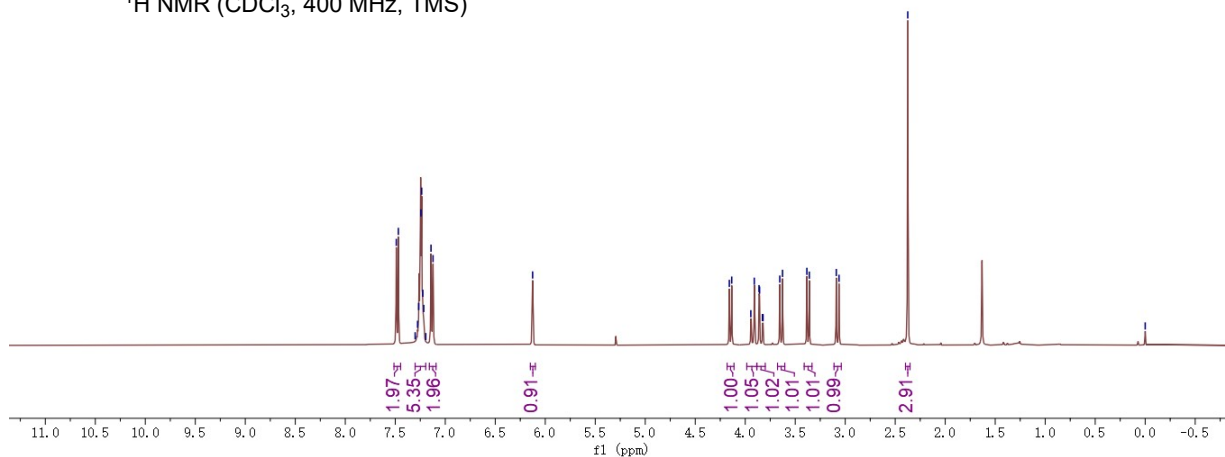

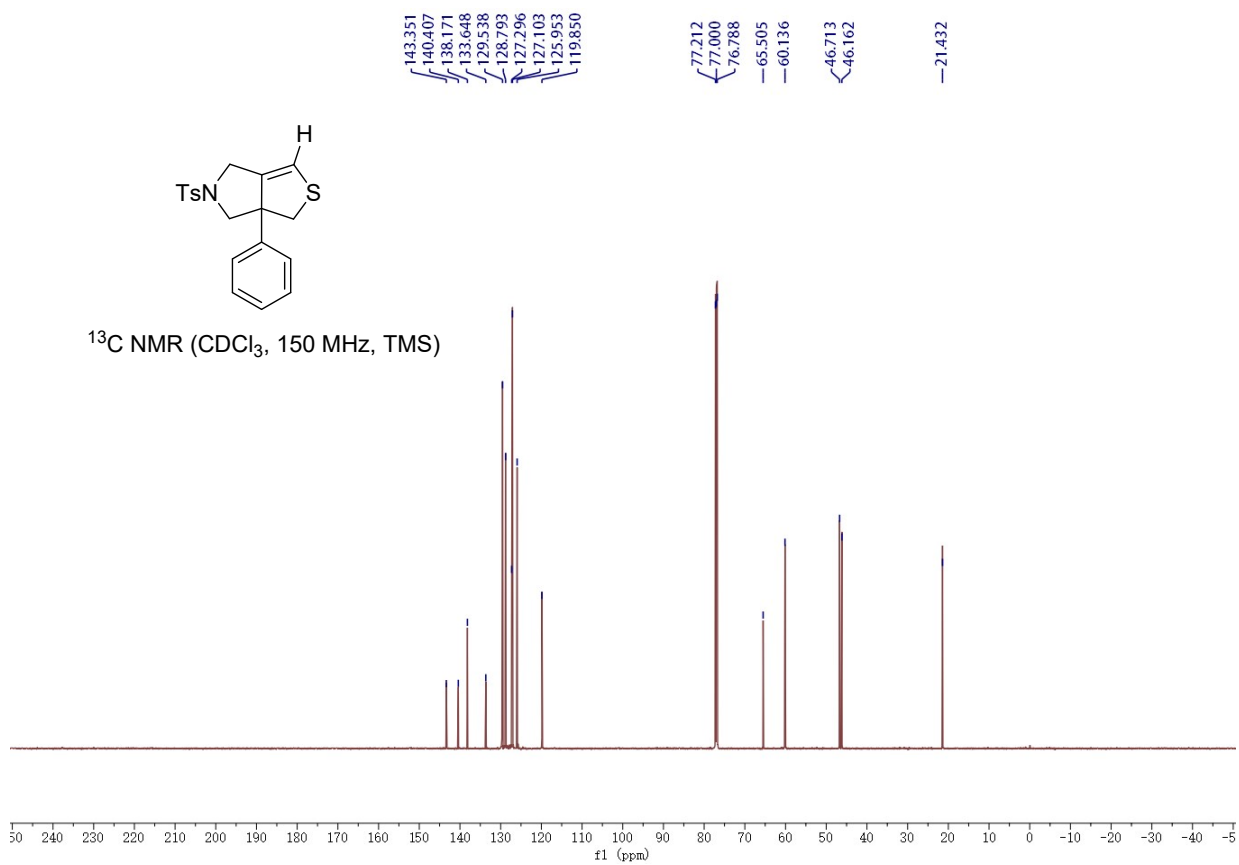

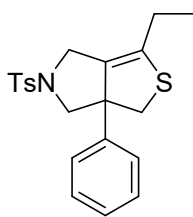

**3-ethyl-6a-phenyl-5-tosyl-4,5,6,6a-tetrahydro-1H-thieno[3,4-c]pyrrole (3c)**

A colorless oil, 34.7 mg, 90% yield.  $^1\text{H}$  NMR ( $\text{CDCl}_3$ , TMS, 400 MHz)  $\delta$  7.46 (d,  $J = 8.0$  Hz, 2H), 7.25 – 7.16 (m, 5H), 7.11 (d,  $J = 8.0$  Hz, 2H), 4.08 (d,  $J = 9.6$  Hz, 1H), 3.93 (d,  $J = 13.3$  Hz, 1H), 3.74 (d,  $J = 13.2$  Hz, 1H), 3.64 (d,  $J = 10.9$  Hz, 1H), 3.39 (d,  $J = 9.6$  Hz, 1H), 3.01 (d,  $J = 10.9$  Hz, 1H), 2.37 (s, 3H), 2.31 (q,  $J = 7.5$  Hz, 2H), 1.12 (t,  $J = 7.6$  Hz, 3H).  $^{13}\text{C}$  NMR ( $\text{CDCl}_3$ , TMS, 100 MHz)  $\delta$  143.3, 141.3, 138.4, 133.8, 130.5, 129.5, 128.8, 127.2, 127.1, 126.1, 66.2, 60.4, 46.0, 45.6, 23.1, 21.5, 13.5. IR (Acetone)  $\nu$  678, 897, 1162, 1333, 1718, 2983  $\text{cm}^{-1}$ . HRMS (ESI) calcd. for  $\text{C}_{21}\text{H}_{24}\text{O}_2\text{NS}_2$  (M+H): 386.1243, Found: 386.1229.

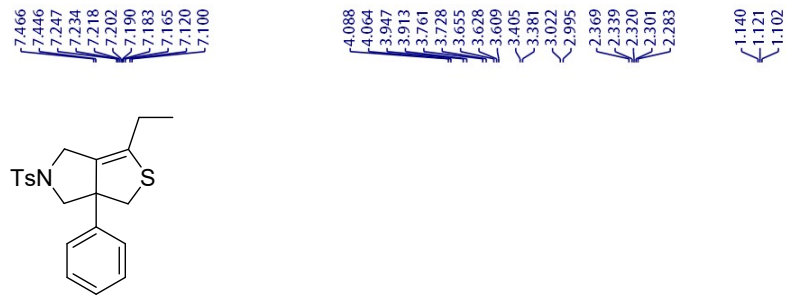

<sup>1</sup>H NMR (CDCl<sub>3</sub>, 400 MHz, TMS)

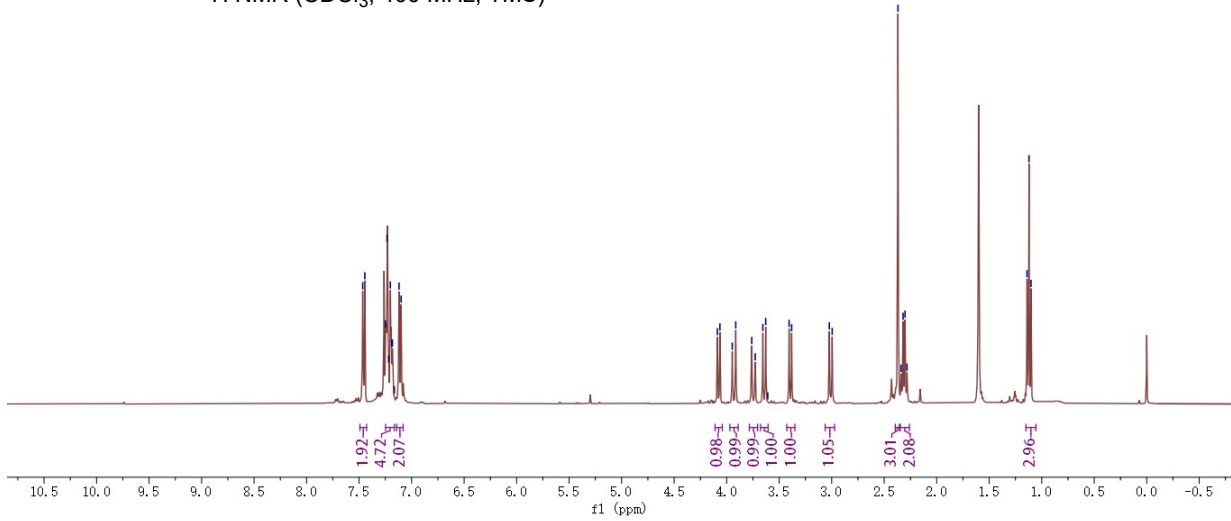

R1=Et. 2. 1. 1r

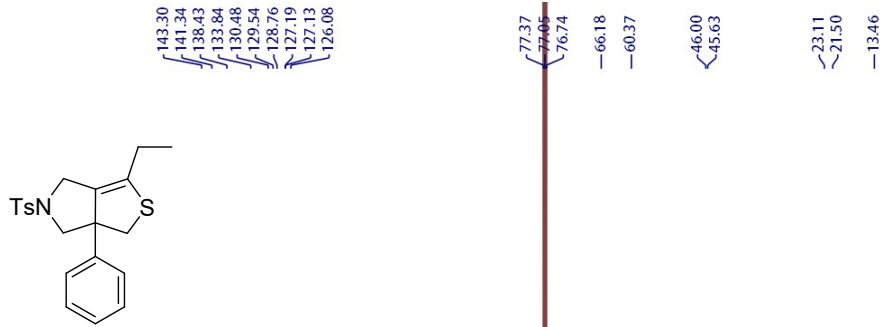

<sup>13</sup>C NMR (CDCl<sub>3</sub>, 100 MHz, TMS)

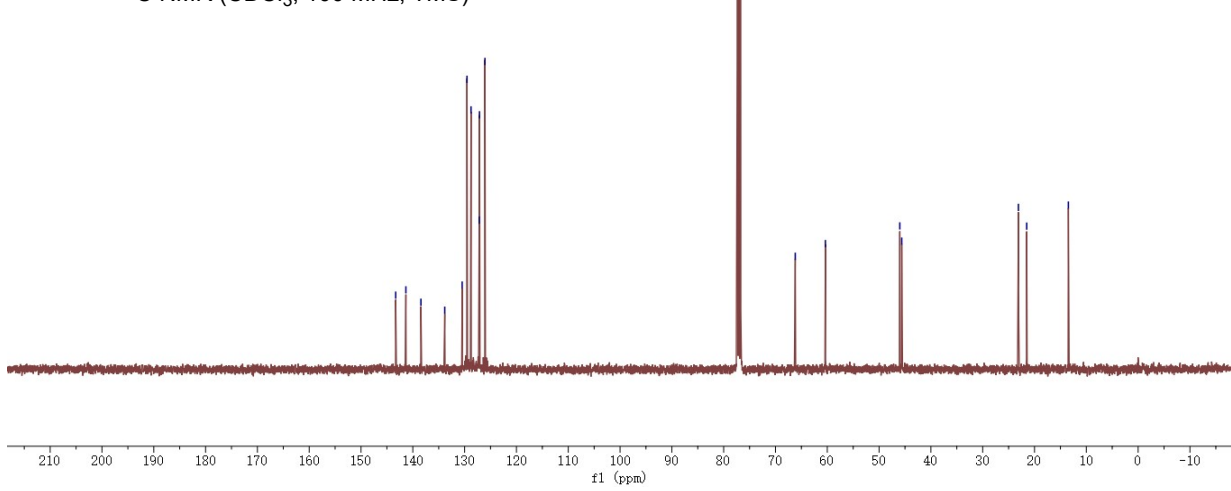

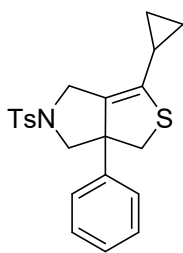

### 3-cyclopropyl-6a-phenyl-5-tosyl-4,5,6,6a-tetrahydro-1H-thieno[3,4-c]pyrrole (3d)

A colorless oil, 35.0 mg, 88% yield.  $^1\text{H}$  NMR ( $\text{CDCl}_3$ , TMS, 400 MHz)  $\delta$  7.47 (d,  $J = 8.0$  Hz, 2H), 7.26-7.21 (m, 3H), 7.21-7.15 (m, 2H), 7.12 (d,  $J = 8.0$  Hz, 2H), 4.09 – 3.98 (m, 2H), 3.82 (d,  $J = 13.3$  Hz, 1H), 3.58 (d,  $J = 10.9$  Hz, 1H), 3.39 (d,  $J = 9.6$  Hz, 1H), 2.98 (d,  $J = 10.9$  Hz, 1H), 2.37 (s, 3H), 1.60 – 1.56 (m, 1H), 0.89 – 0.78 (m, 2H), 0.75 – 0.62 (m, 2H).  $^{13}\text{C}$  NMR ( $\text{CDCl}_3$ , TMS, 100 MHz)  $\delta$  143.3, 141.4, 139.0, 133.9, 130.6, 129.6, 128.7, 127.18, 127.16, 126.1, 66.4, 60.3, 46.3, 45.1, 38.2, 31.3, 29.7, 21.5, 10.9, 7.1, 6.6. IR (Acetone)  $\nu$  679, 887, 1138, 1371, 1732, 2987  $\text{cm}^{-1}$ . HRMS (ESI) calcd. for  $\text{C}_{22}\text{H}_{24}\text{O}_2\text{NS}_2$  (M+H): 398.1243, Found: 398.1229.

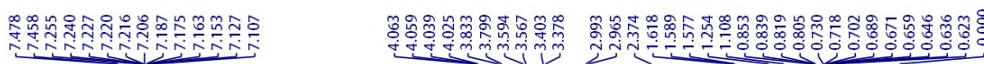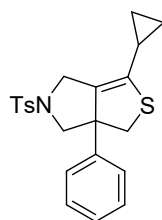

$^1\text{H}$  NMR ( $\text{CDCl}_3$ , 400 MHz, TMS)

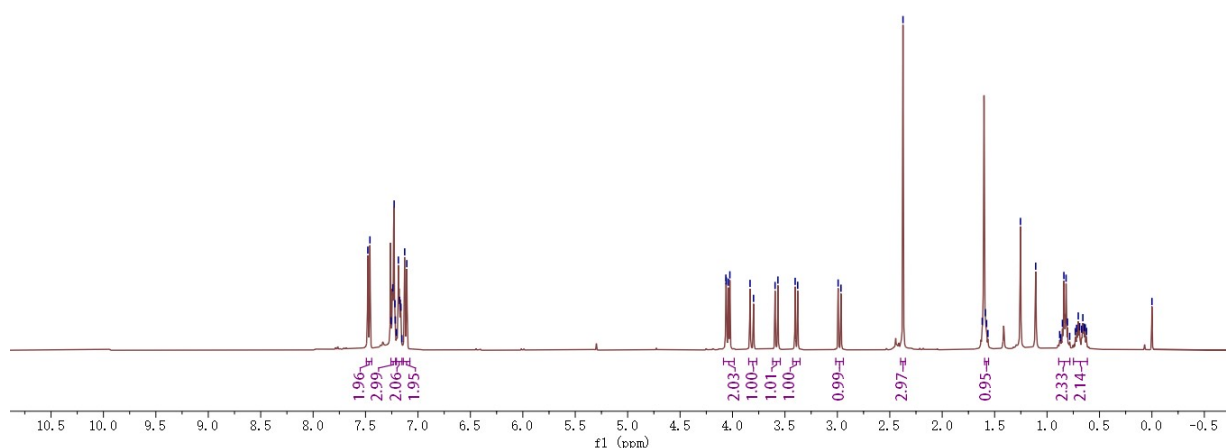

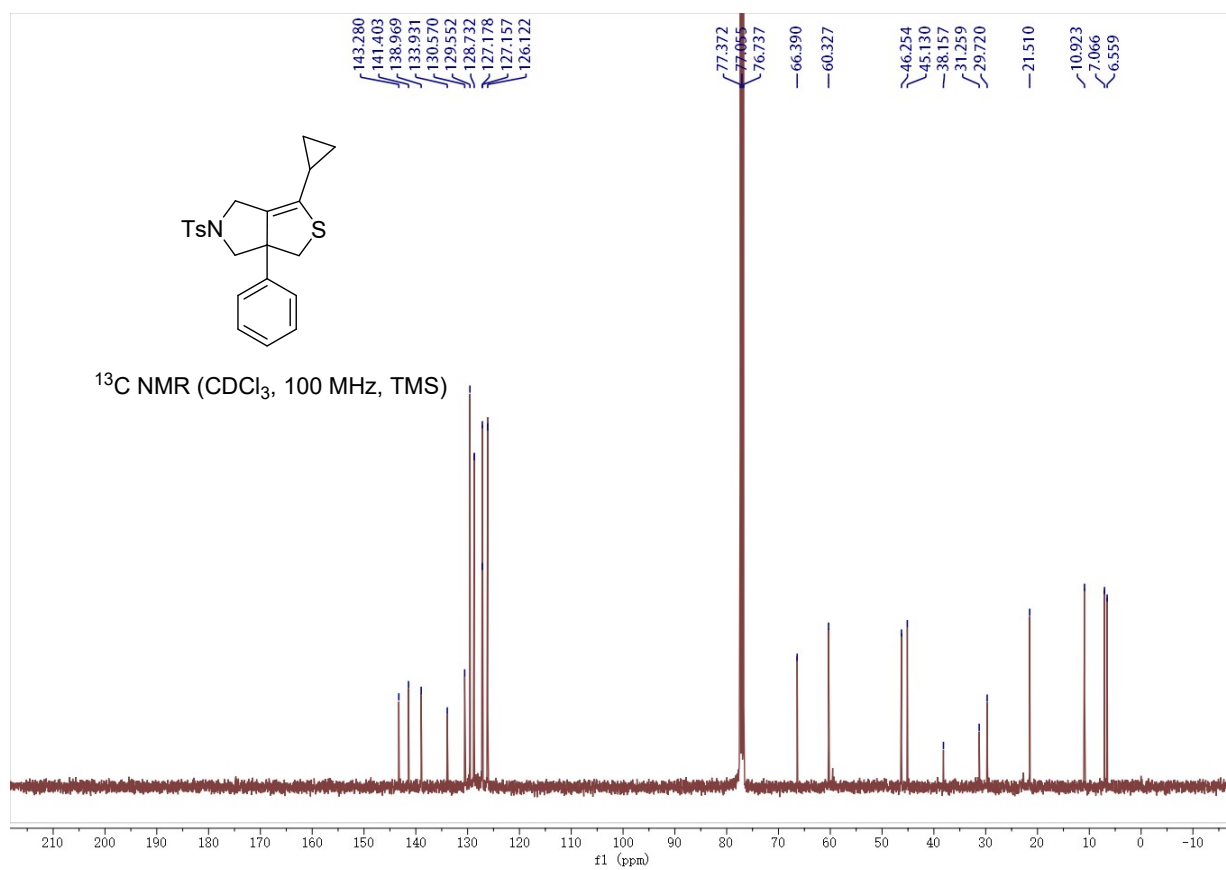



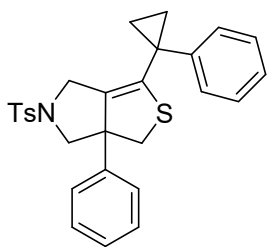

**6a-phenyl-3-(1-phenylcyclopropyl)-5-tosyl-4,5,6,6a-tetrahydro-1H-thieno[3,4-c]pyrrole (3e)**

A colorless oil, 38.3 mg, 81% yield.  $^1\text{H}$  NMR ( $\text{CDCl}_3$ , TMS, 400 MHz)  $\delta$  7.40 (d,  $J = 8.3$  Hz, 2H), 7.33 – 7.27 (m, 5H), 7.26 – 7.22 (m, 3H), 7.16 – 7.11 (m, 4H), 3.99 (d,  $J = 9.4$  Hz, 1H), 3.60 – 3.53 (m, 2H), 3.41 (d,  $J = 14.3$  Hz, 1H), 3.26 (d,  $J = 9.4$  Hz, 1H), 2.97 (d,  $J = 10.9$  Hz, 1H), 2.40 (s, 3H), 1.34 – 1.25 (m, 2H), 1.18 – 1.03 (m, 2H).  $^{13}\text{C}$  NMR ( $\text{CDCl}_3$ , TMS, 150 MHz)  $\delta$  143.2, 142.3, 141.3, 140.5, 133.5, 132.6, 129.5, 128.7, 128.6, 128.5, 127.3, 127.2, 127.1, 126.0, 67.9, 60.1, 46.4, 44.7, 25.7, 21.5, 16.7, 14.2. IR (Acetone)  $\nu$  636, 791, 901, 1361, 1779, 2921  $\text{cm}^{-1}$ . HRMS (ESI) calcd. for  $\text{C}_{28}\text{H}_{28}\text{O}_2\text{NS}_2$  (M+H): 474.1556, Found: 474.1544.

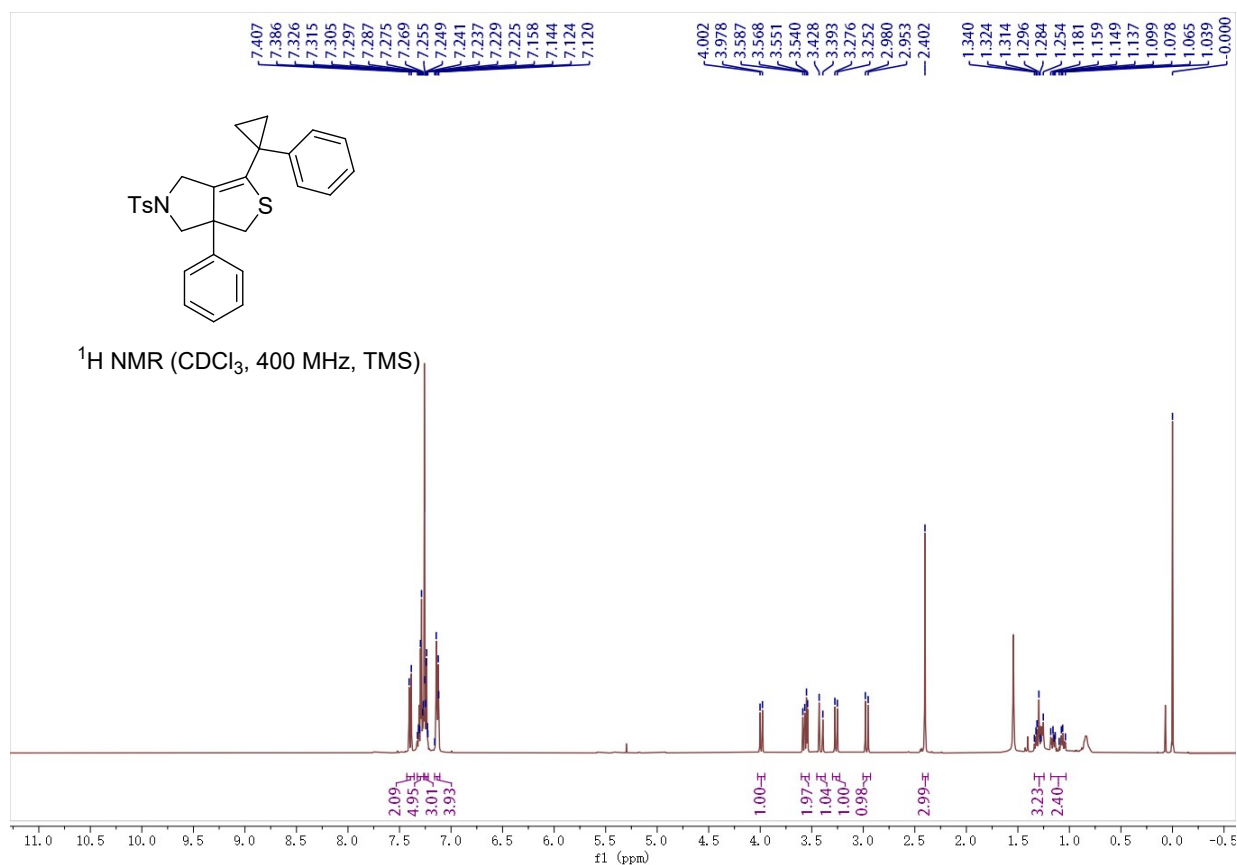

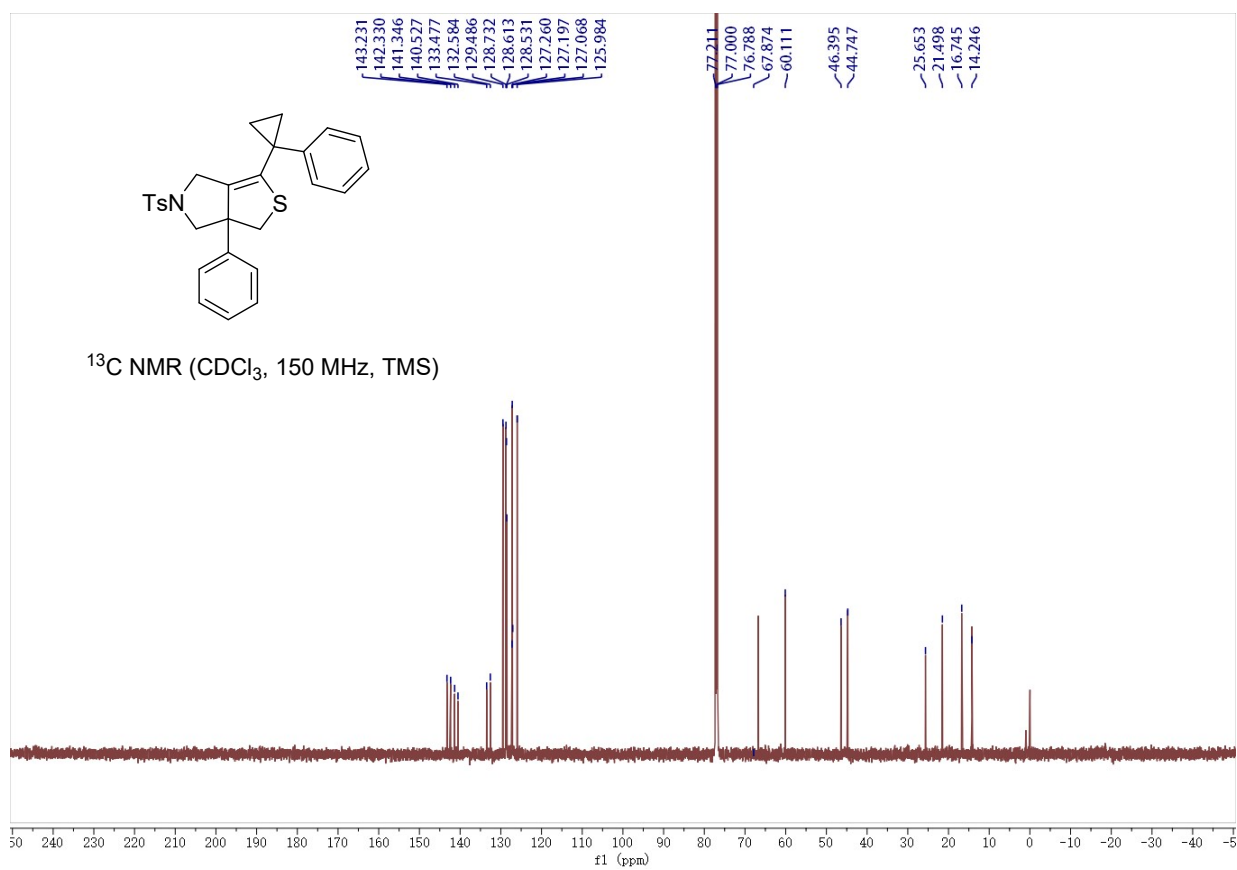

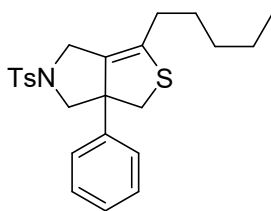

### 3-pentyl-6a-phenyl-5-tosyl-4,5,6,6a-tetrahydro-1H-thieno[3,4-c]pyrrole (3f)

A colorless oil, 34.2 mg, 80% yield.  $^1\text{H}$  NMR ( $\text{CDCl}_3$ , TMS, 600 MHz)  $\delta$  7.65 (d,  $J = 8.3$  Hz, 2H), 7.26 – 7.21 (m, 4H), 7.19 – 7.15 (m, 3H), 5.33 (t,  $J = 7.0$  Hz, 1H), 3.76 (d,  $J = 10.0$  Hz, 1H), 3.61 – 3.54 (m, 1H), 3.47 (d,  $J = 10.0$  Hz, 1H), 3.40 (t,  $J = 7.9$  Hz, 1H), 3.27 (dd,  $J = 10.1, 7.2$  Hz, 1H), 3.13 (d,  $J = 11.5$  Hz, 1H), 3.00 (d,  $J = 11.4$  Hz, 1H), 2.36 (s, 3H), 1.93 – 1.80 (m, 2H), 1.32 – 1.18 (m, 4H), 0.82 (t,  $J = 7.2$  Hz, 3H).  $^{13}\text{C}$  NMR ( $\text{CDCl}_3$ , TMS, 150 MHz)  $\delta$  143.7, 142.4, 140.4, 133.6, 129.8, 128.7, 127.5, 127.4, 125.8, 120.3, 58.7, 56.9, 55.7, 52.7, 42.3, 31.2, 31.1, 22.3, 21.6, 13.9. IR (Acetone)  $\nu$  665, 1091, 1161, 1342, 1707, 2925  $\text{cm}^{-1}$ . HRMS (ESI) calcd. for  $\text{C}_{24}\text{H}_{30}\text{O}_2\text{NS}_2$  (M+H): 428.1712, Found: 428.1700.

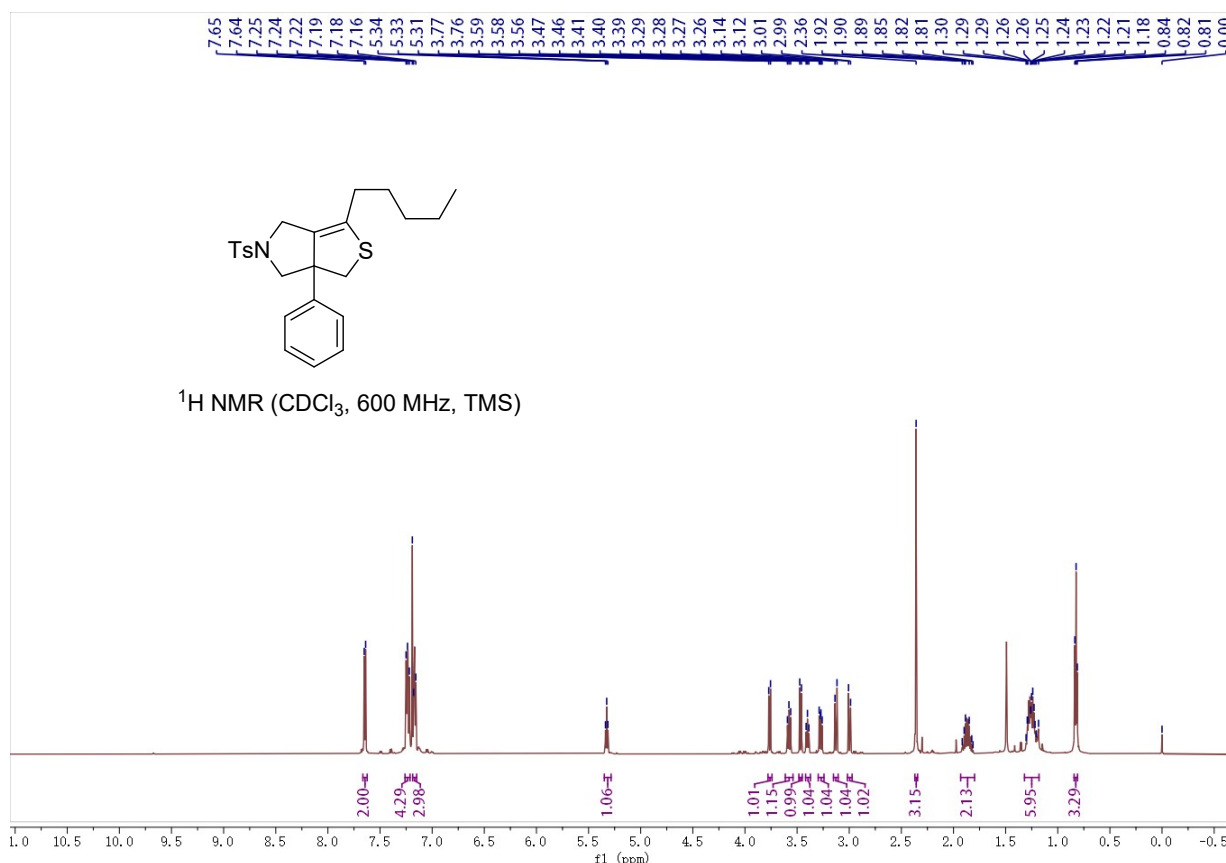

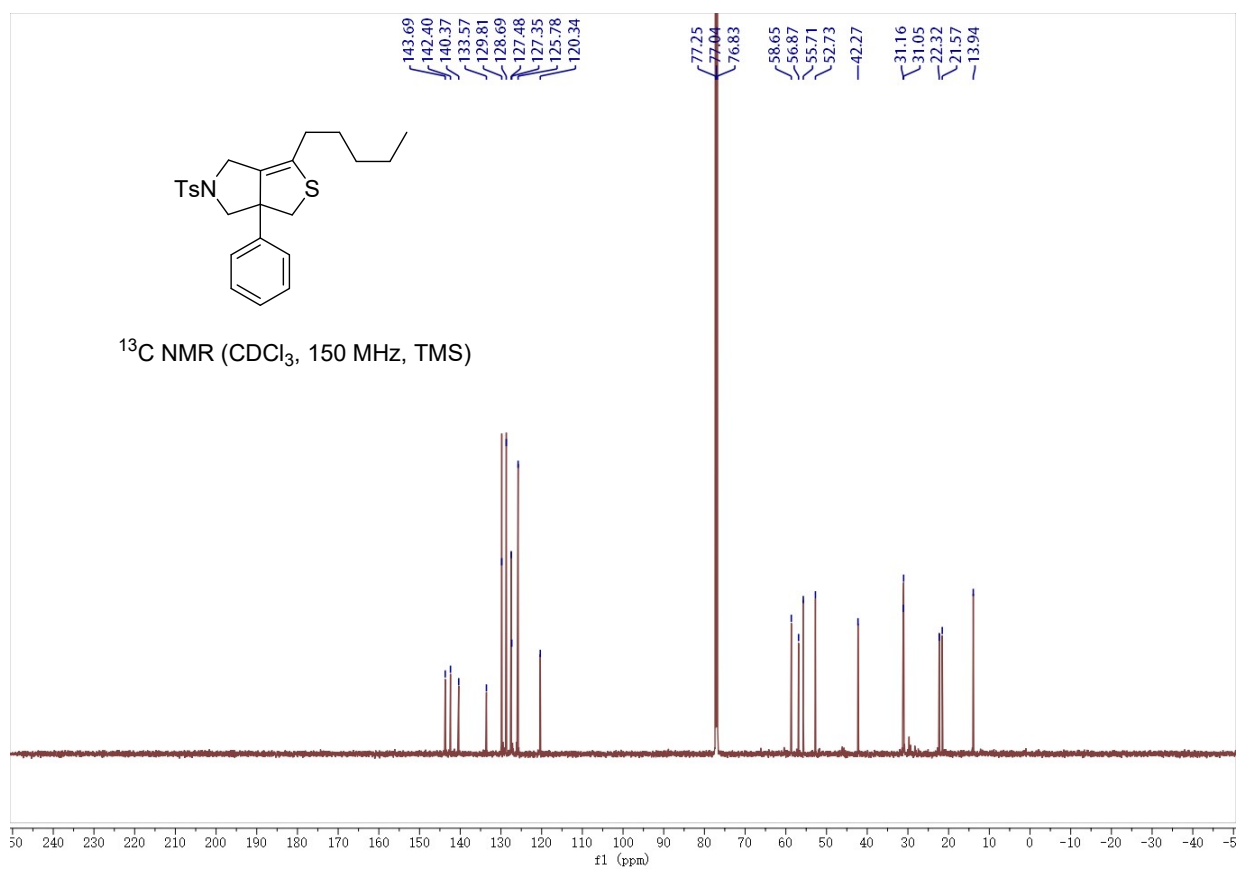

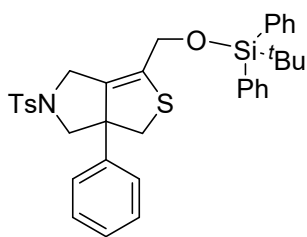

**3-((*tert*-butyldiphenylsilyloxy)-6a-phenyl-5-tosyl-4,5,6,6a-tetrahydro-1*H*-thieno[3,4-*c*]pyrrole (3g)**

A colorless oil, 46.9 mg, 75% yield.  $^1\text{H}$  NMR ( $\text{CDCl}_3$ , TMS, 400 MHz)  $\delta$  7.69 – 7.64 (m, 4H), 7.51 – 7.35 (m, 8H), 7.27-7.24 (m, 3H), 7.22 – 7.18 (m, 2H), 7.11 (d,  $J = 8.0$  Hz, 2H), 4.39 (d,  $J = 14.6$  Hz, 1H), 4.29 (d,  $J = 14.5$  Hz, 1H), 4.07 (d,  $J = 9.5$  Hz, 1H), 3.94 (d,  $J = 14.2$  Hz, 1H), 3.76 (d,  $J = 14.2$  Hz, 1H), 3.60 (d,  $J = 10.9$  Hz, 1H), 3.29 (d,  $J = 9.5$  Hz, 1H), 3.01 (d,  $J = 10.9$  Hz, 1H), 2.38 (s, 3H), 1.09 (s, 9H).  $^{13}\text{C}$  NMR ( $\text{CDCl}_3$ , TMS, 150 MHz)  $\delta$  143.2, 141.0, 135.55, 135.51, 134.9, 133.7, 132.7, 132.1, 130.00, 129.98, 129.5, 128.7, 127.9, 127.25, 127.18, 126.1, 66.4, 61.3, 59.8, 46.6, 45.4, 26.8, 21.5, 19.2. IR (Acetone)  $\nu$  663, 821, 1092, 1112, 1161, 1347, 1710, 2848, 2916  $\text{cm}^{-1}$ . HRMS (ESI) calcd. for  $\text{C}_{36}\text{H}_{40}\text{O}_3\text{NS}_2\text{Si}$  ( $\text{M}+\text{H}$ ): 626.2213, Found: 626.2192.

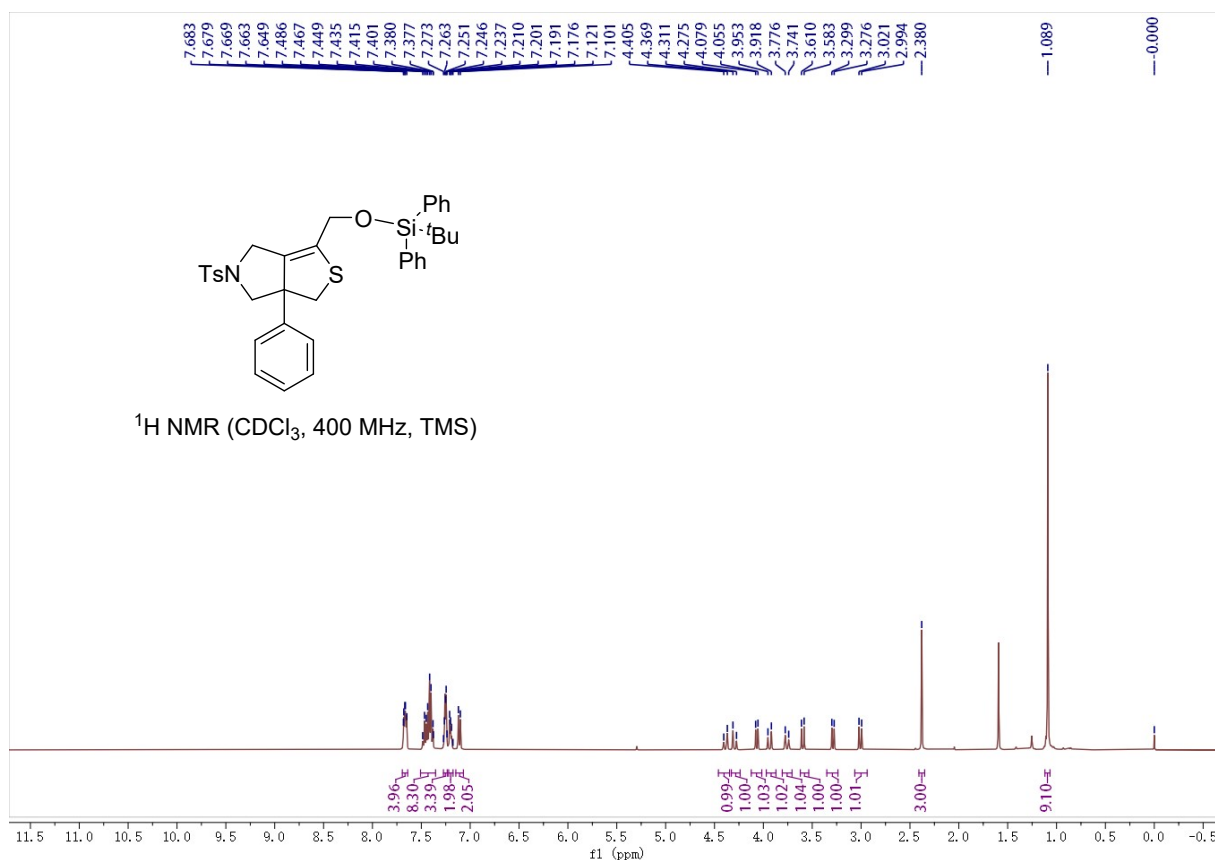

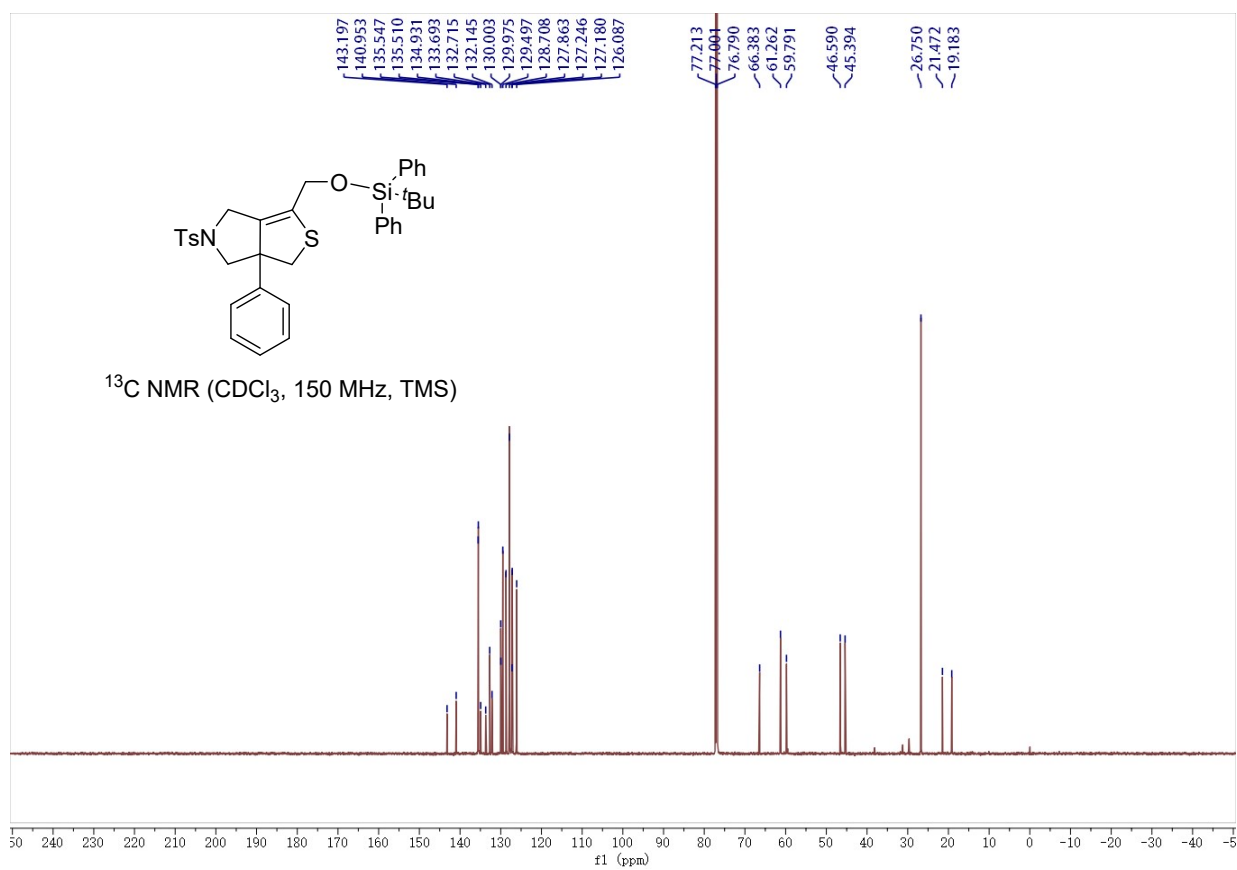

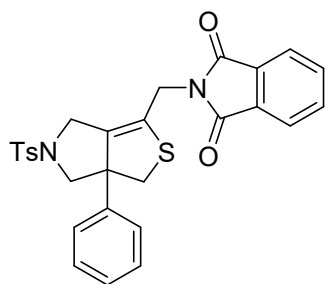

**2-((6a-phenyl-5-tosyl-4,5,6,6a-tetrahydro-1H-thieno[3,4-c]pyrrol-3-yl)methyl)isoindoline-1,3-dione (3h)**

A colorless oil, 53.4 mg, 78% yield.  $^1\text{H NMR}$  ( $\text{CDCl}_3$ , TMS, 600 MHz)  $\delta$  7.88 (dd,  $J = 5.5, 3.1$  Hz, 2H), 7.76 (dd,  $J = 5.5, 3.1$  Hz, 2H), 7.50 (d,  $J = 8.3$  Hz, 2H), 7.25 – 7.12 (m, 7H), 4.47 (s, 2H), 4.24 (d,  $J = 14.0$  Hz, 1H), 4.08 (d,  $J = 9.5$  Hz, 1H), 3.92 (d,  $J = 14.1$  Hz, 1H), 3.63 (d,  $J = 11.1$  Hz, 1H), 3.34 (d,  $J = 9.6$  Hz, 1H), 3.01 (d,  $J = 11.1$  Hz, 1H), 2.39 (s, 3H).  $^{13}\text{C NMR}$  ( $\text{CDCl}_3$ , TMS, 150 MHz)  $\delta$  167.4, 143.3, 140.6, 136.3, 134.3, 133.7, 131.9, 130.5, 129.6, 128.8, 127.4, 127.2, 126.0, 123.6, 66.4, 60.1, 46.1, 45.8, 35.5, 21.5. IR (Acetone)  $\nu$  729, 1108, 1161, 1229, 1345, 1716, 2985  $\text{cm}^{-1}$ . HRMS (ESI) calcd. for  $\text{C}_{28}\text{H}_{25}\text{O}_4\text{N}_2\text{S}_2$  (M+H): 517.1250, Found: 517.1239.

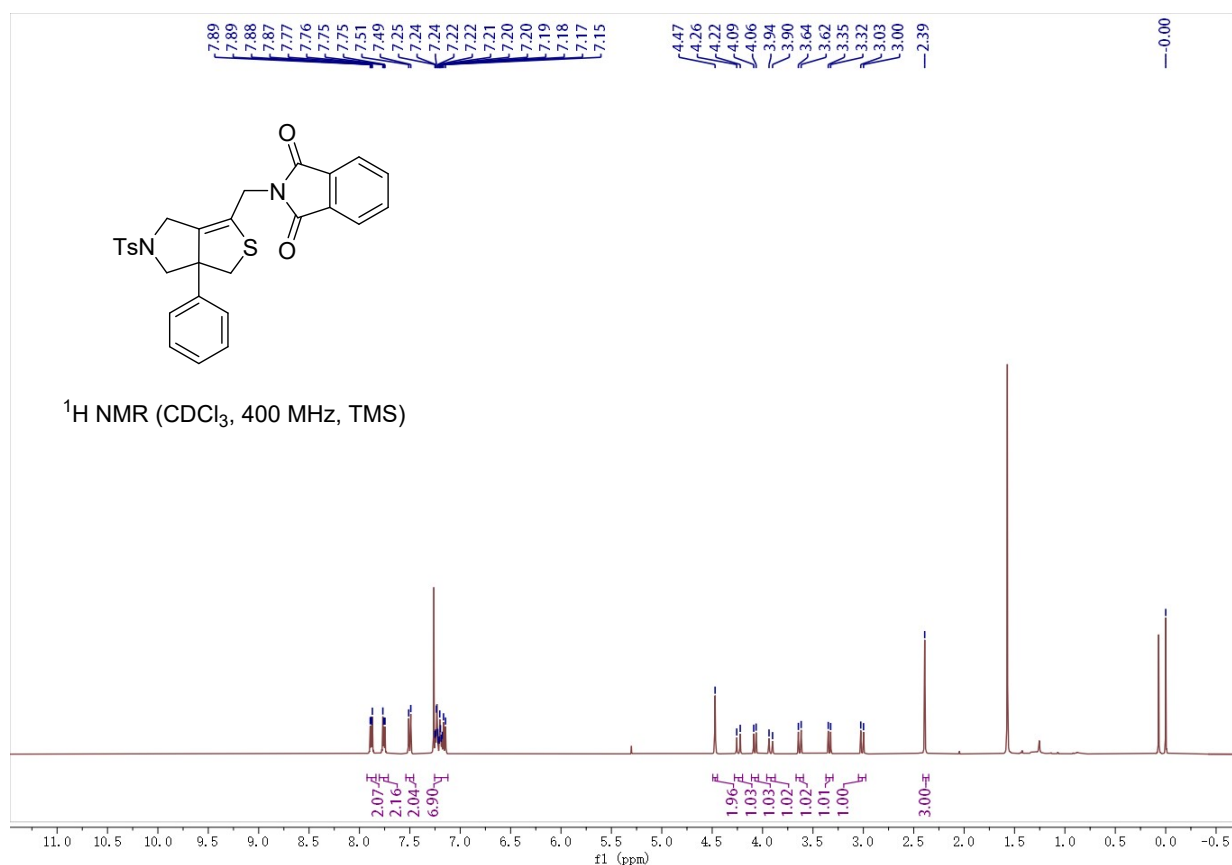

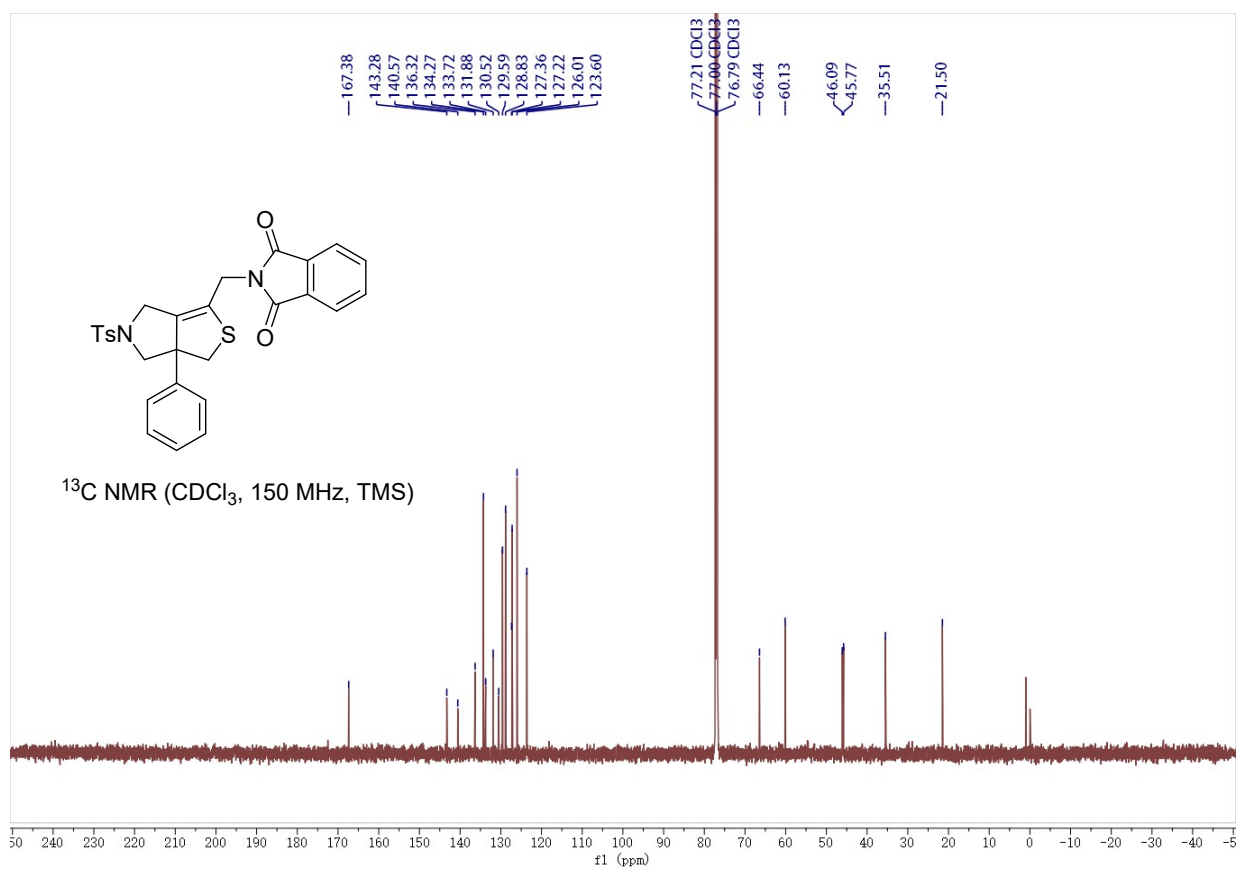



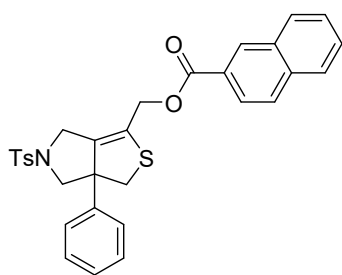

**(6a-phenyl-5-tosyl-4,5,6,6a-tetrahydro-1H-thieno[3,4-c]pyrrol-3-yl)methyl 2-naphthoate (3i)**

A colorless oil, 39.5 mg, 73% yield.  $^1\text{H}$  NMR ( $\text{CDCl}_3$ , TMS, 400 MHz)  $\delta$  8.94 (d,  $J = 8.8$  Hz, 1H), 8.23 (d,  $J = 7.3$  Hz, 1H), 8.09 (d,  $J = 8.2$  Hz, 1H), 7.93 (d,  $J = 8.7$  Hz, 1H), 7.68 – 7.63 (m, 1H), 7.61 – 7.52 (m, 2H), 7.45 (d,  $J = 8.3$  Hz, 2H), 7.28 – 7.26 (m, 2H), 7.07 (d,  $J = 8.1$  Hz, 2H), 5.08 (s, 2H), 4.19 – 4.10 (m, 2H), 3.93 (d,  $J = 14.3$  Hz, 1H), 3.73 (d,  $J = 11.1$  Hz, 1H), 3.40 (d,  $J = 9.6$  Hz, 1H), 3.11 (d,  $J = 11.0$  Hz, 1H), 2.32 (s, 3H).  $^{13}\text{C}$  NMR ( $\text{CDCl}_3$ , TMS, 100 MHz)  $\delta$  166.7, 143.4, 140.5, 136.4, 134.0, 133.9, 133.6, 131.4, 130.8, 130.6, 129.6, 128.9, 128.7, 128.0, 127.5, 127.2, 126.4, 126.2, 126.0, 125.7, 124.6, 66.5, 60.4, 60.1, 46.3, 45.8, 21.5. IR (Acetone)  $\nu$  661, 780, 1062, 1128, 1160, 1239, 1342, 1711, 3052  $\text{cm}^{-1}$ . HRMS (ESI) calcd. for  $\text{C}_{31}\text{H}_{28}\text{NO}_4\text{S}_2$  ( $\text{M}+\text{H}$ ): 542.1437, Found: 542.1439.

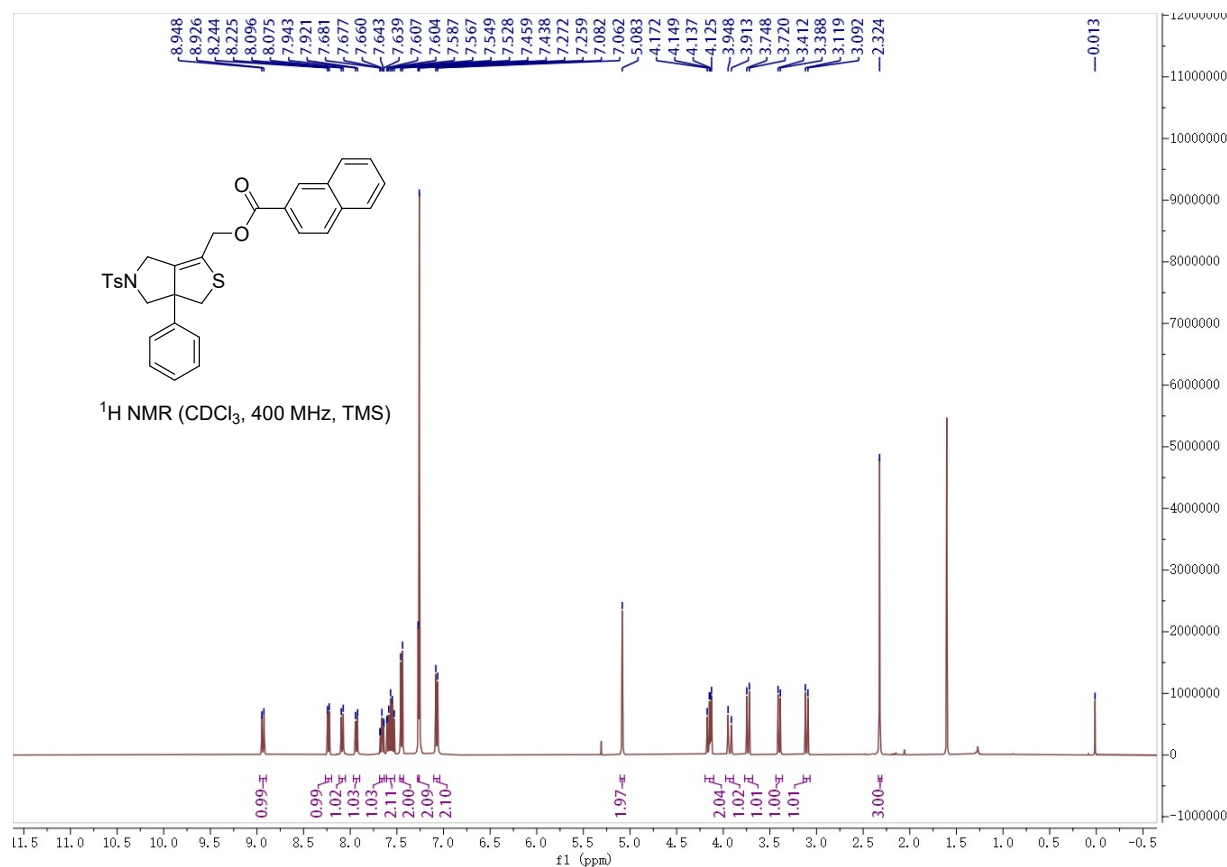

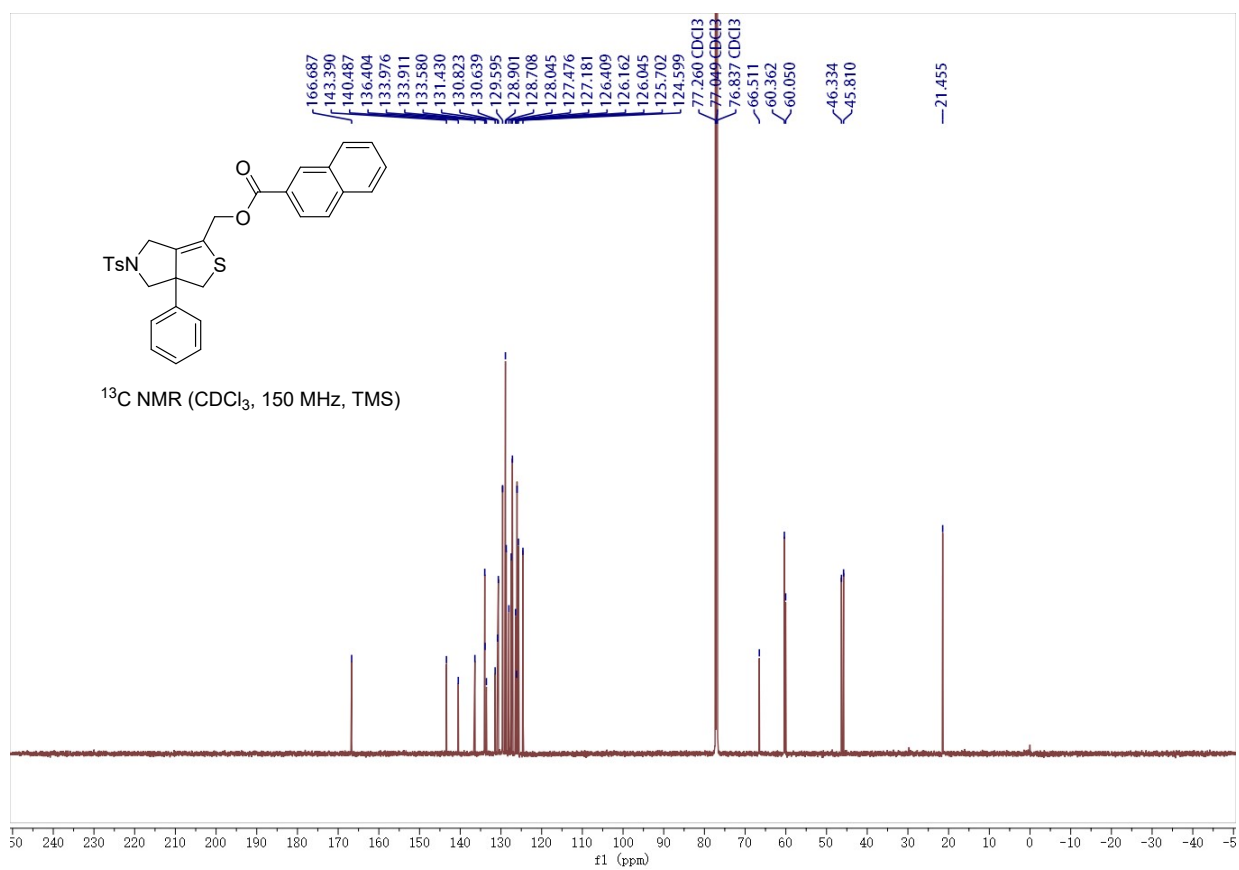

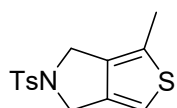

**1-methyl-5-tosyl-5,6-dihydro-4H-thieno[3,4-c]pyrrole (3j)**

A colorless oil, 15.6 mg, 53% yield.  $^1\text{H}$  NMR ( $\text{CDCl}_3$ , TMS, 400 MHz)  $\delta$  7.76 (d,  $J = 8.1$  Hz, 2H), 7.32 (d,  $J = 8.1$  Hz, 2H), 6.61 (s, 1H), 4.33 (s, 2H), 4.28 (s, 2H), 2.42 (s, 3H), 2.29 (s, 3H).  $^{13}\text{C}$  NMR ( $\text{CDCl}_3$ , TMS, 150 MHz)  $\delta$  143.7, 139.4, 137.0, 136.8, 133.8, 129.8, 129.4, 127.6, 112.2, 49.3, 48.3, 21.5, 13.3. IR (Acetone)  $\nu$  668, 813, 1044, 1095, 1158, 1344, 1601, 2971  $\text{cm}^{-1}$ . HRMS (ESI) calcd. for  $\text{C}_{14}\text{H}_{15}\text{NNaO}_2\text{S}_2(\text{M}+\text{Na})$ : 316.0442, Found: 316.0522.

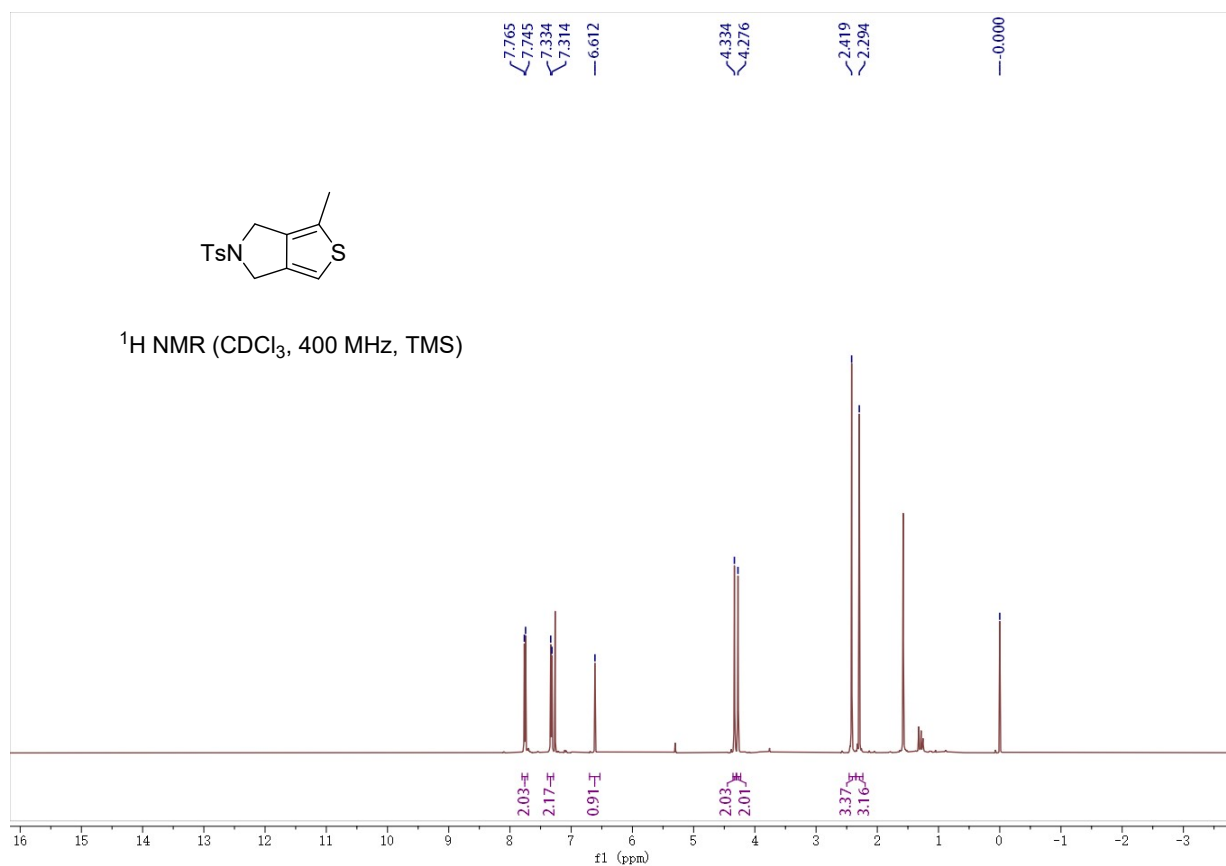

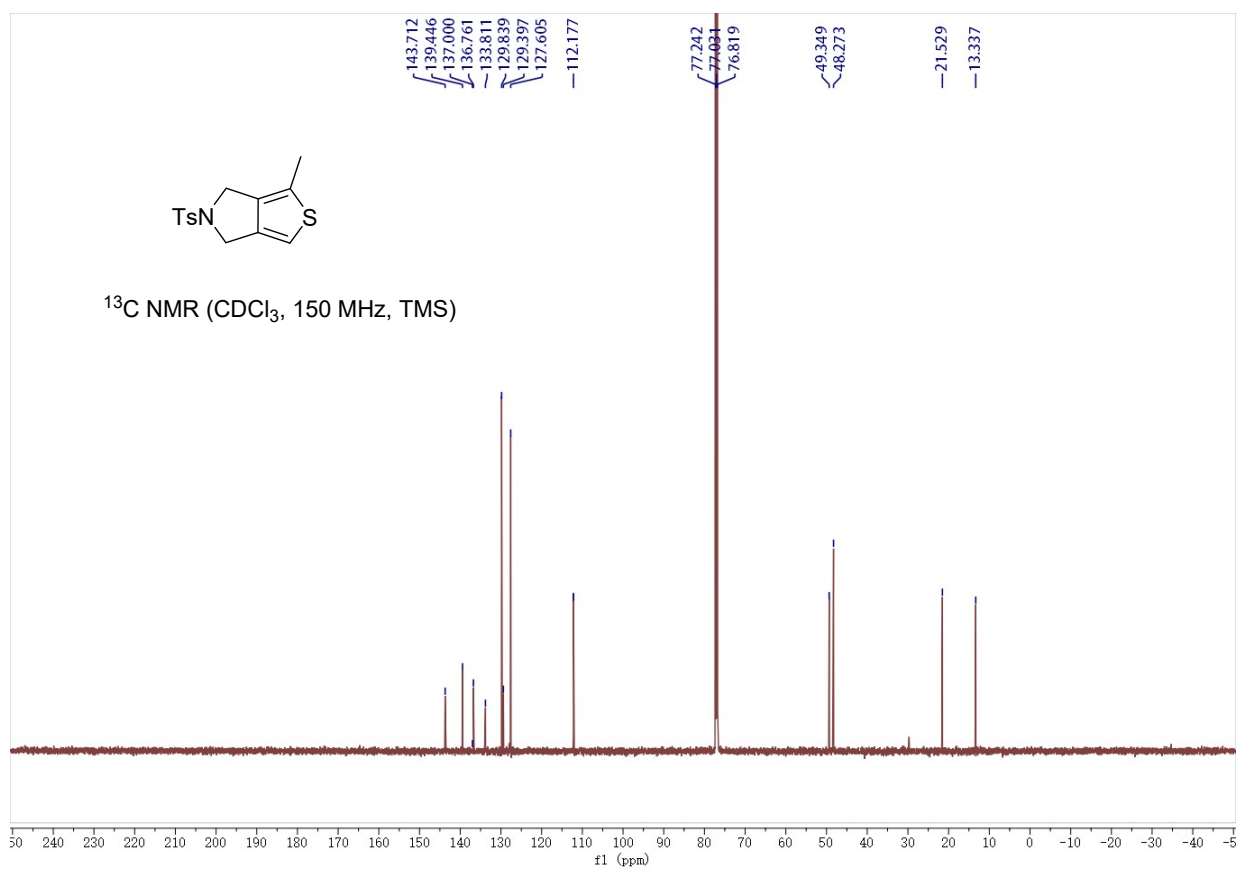

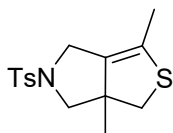

### 3,6a-dimethyl-5-tosyl-4,5,6,6a-tetrahydro-1H-thieno[3,4-c]pyrrole (3k)

A colorless oil, 29.7 mg, 96% yield.  $^1\text{H}$  NMR ( $\text{CDCl}_3$ , TMS, 400 MHz)  $\delta$  7.71 (d,  $J = 8.3$  Hz, 2H), 7.34 (d,  $J = 7.7$  Hz, 2H), 3.81 (dq,  $J = 13.6, 1.8$  Hz, 1H), 3.71 (dq,  $J = 13.5, 1.1$  Hz, 1H), 3.45 (d,  $J = 9.0$  Hz, 1H), 3.28 (d,  $J = 10.8$  Hz, 1H), 2.96 (d,  $J = 9.0$  Hz, 1H), 2.77 (d,  $J = 10.8$  Hz, 1H), 2.45 (s, 3H), 1.75 (s, 3H), 1.15 (s, 3H).  $^{13}\text{C}$  NMR ( $\text{CDCl}_3$ , TMS, 100 MHz)  $\delta$  143.7, 134.2, 133.9, 129.8, 127.5, 126.5, 59.2, 58.8, 45.3, 43.8, 21.6, 20.0, 14.6. IR (Acetone)  $\nu$  668, 813, 1344, 1601, 2970  $\text{cm}^{-1}$ . HRMS (ESI) calcd. for  $\text{C}_{15}\text{H}_{20}\text{O}_2\text{NS}_2$  ( $\text{M}+\text{H}$ ): 310.0930, Found: 310.0920.

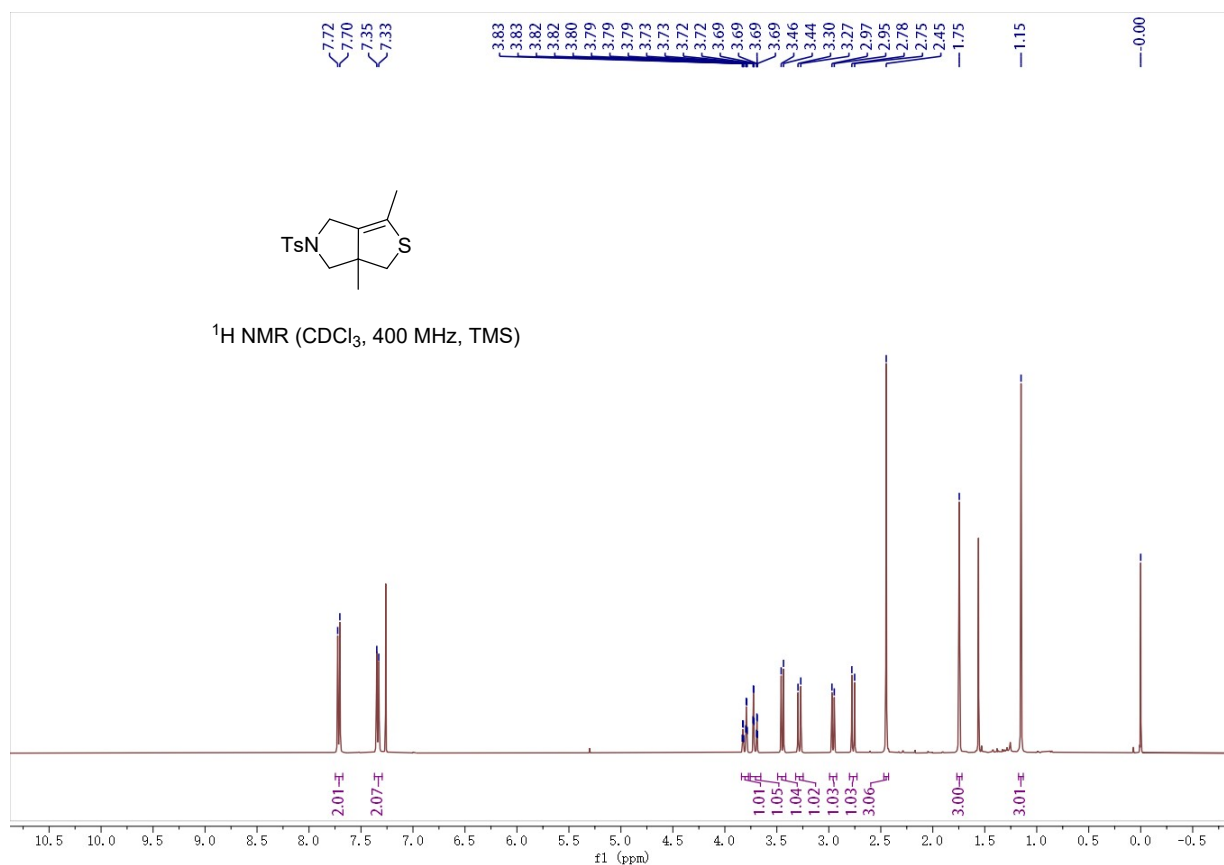

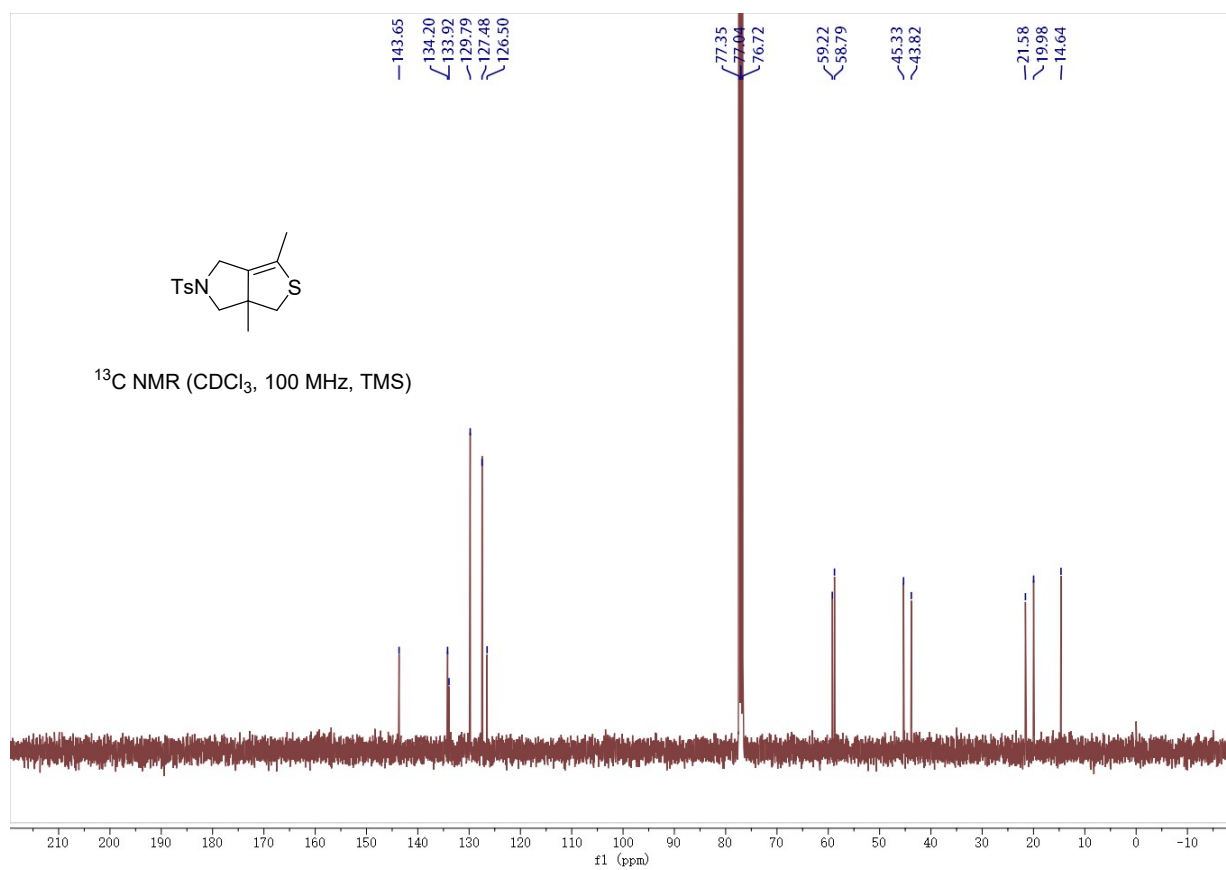

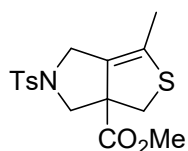

**methyl 3-methyl-5-tosyl-5,6-dihydro-1*H*-thieno[3,4-*c*]pyrrole-6a(4*H*)-carboxylate (3I)**

A colorless oil, 30.4 mg, 86% yield.  $^1\text{H}$  NMR ( $\text{CDCl}_3$ , TMS, 400 MHz)  $\delta$  7.71 (d,  $J = 8.3$  Hz, 2H), 7.34 (d,  $J = 7.8$  Hz, 2H), 3.95 (d,  $J = 12.5$  Hz, 1H), 3.84 (d,  $J = 12.5$  Hz, 1H), 3.79 (d,  $J = 10.3$  Hz, 1H), 3.58 (d,  $J = 11.3$  Hz, 1H), 3.44 (s, 3H), 3.36 (d,  $J = 11.4$  Hz, 1H), 3.26 (d,  $J = 10.3$  Hz, 1H), 2.44 (s, 3H), 1.85 (s, 3H).  $^{13}\text{C}$  NMR ( $\text{CDCl}_3$ , TMS, 150 MHz)  $\delta$  172.6, 143.6, 134.2, 132.9, 129.7, 128.2, 127.5, 67.3, 56.5, 52.5, 46.5, 40.7, 21.5, 15.0. IR (Acetone)  $\nu$  665, 1086, 1160, 1344, 1432, 1730, 2956  $\text{cm}^{-1}$ . HRMS (ESI) calcd. for  $\text{C}_{16}\text{H}_{20}\text{O}_4\text{NS}_2$  ( $\text{M}+\text{H}$ ): 354.0828, Found: 354.0815.

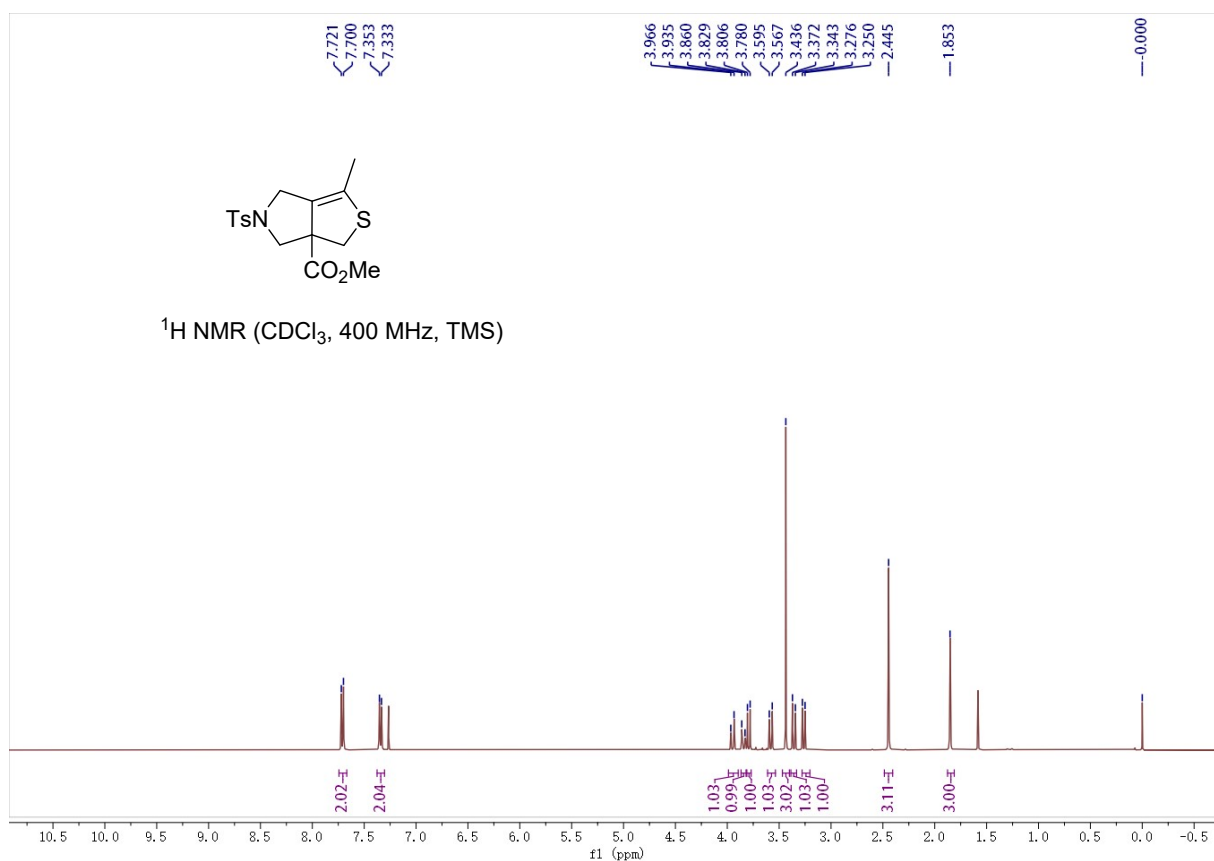

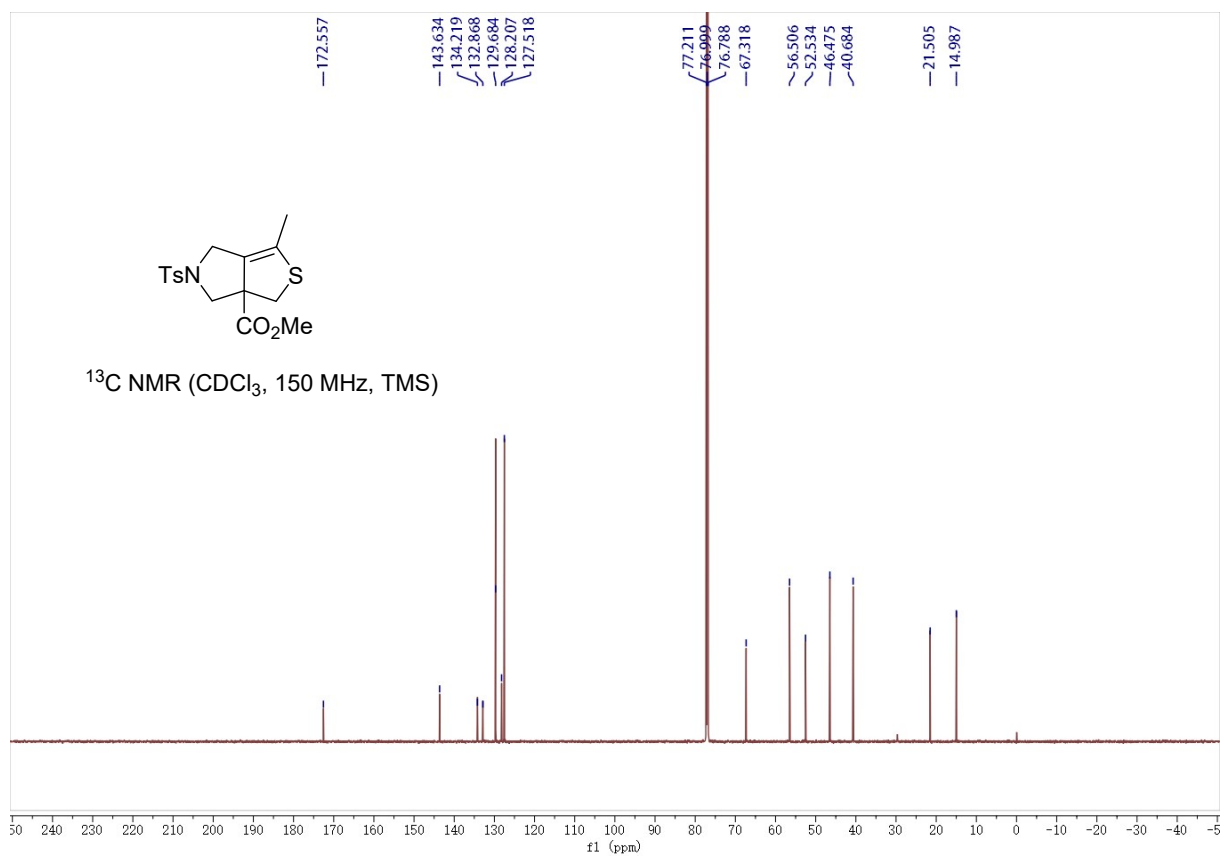



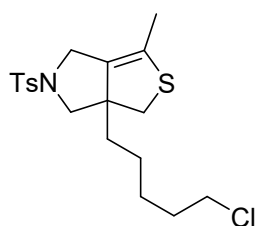

**6a-(5-chloropentyl)-3-methyl-5-tosyl-4,5,6,6a-tetrahydro-1H-thieno[3,4-c]pyrrole (3m)**

A colorless oil, 20.4 mg, 51% yield.  $^1\text{H}$  NMR ( $\text{CDCl}_3$ , TMS, 400 MHz)  $\delta$  7.72 (d,  $J = 8.2$  Hz, 2H), 7.35 (d,  $J = 8.0$  Hz, 2H), 3.75 (s, 2H), 3.55 – 3.48 (m, 3H), 3.21 (d,  $J = 11.1$  Hz, 1H), 2.90 (t,  $J = 10.6$  Hz, 2H), 2.45 (s, 3H), 1.77 (s, 3H), 1.75 – 1.67 (m, 2H), 1.38 – 1.17 (m, 6H).  $^{13}\text{C}$  NMR ( $\text{CDCl}_3$ , TMS, 150 MHz)  $\delta$  143.7, 134.0, 133.1, 129.8, 127.9, 127.4, 62.2, 56.9, 45.6, 45.0, 41.0, 32.6, 32.4, 27.2, 24.2, 21.5, 14.7. IR (Acetone)  $\nu$  900, 1091, 1220, 1358, 1709, 3004  $\text{cm}^{-1}$ . HRMS (ESI) calcd. for  $\text{C}_{19}\text{H}_{27}\text{O}_2\text{NCIS}_2$  (M+H): 400.1166, Found: 400.1162.

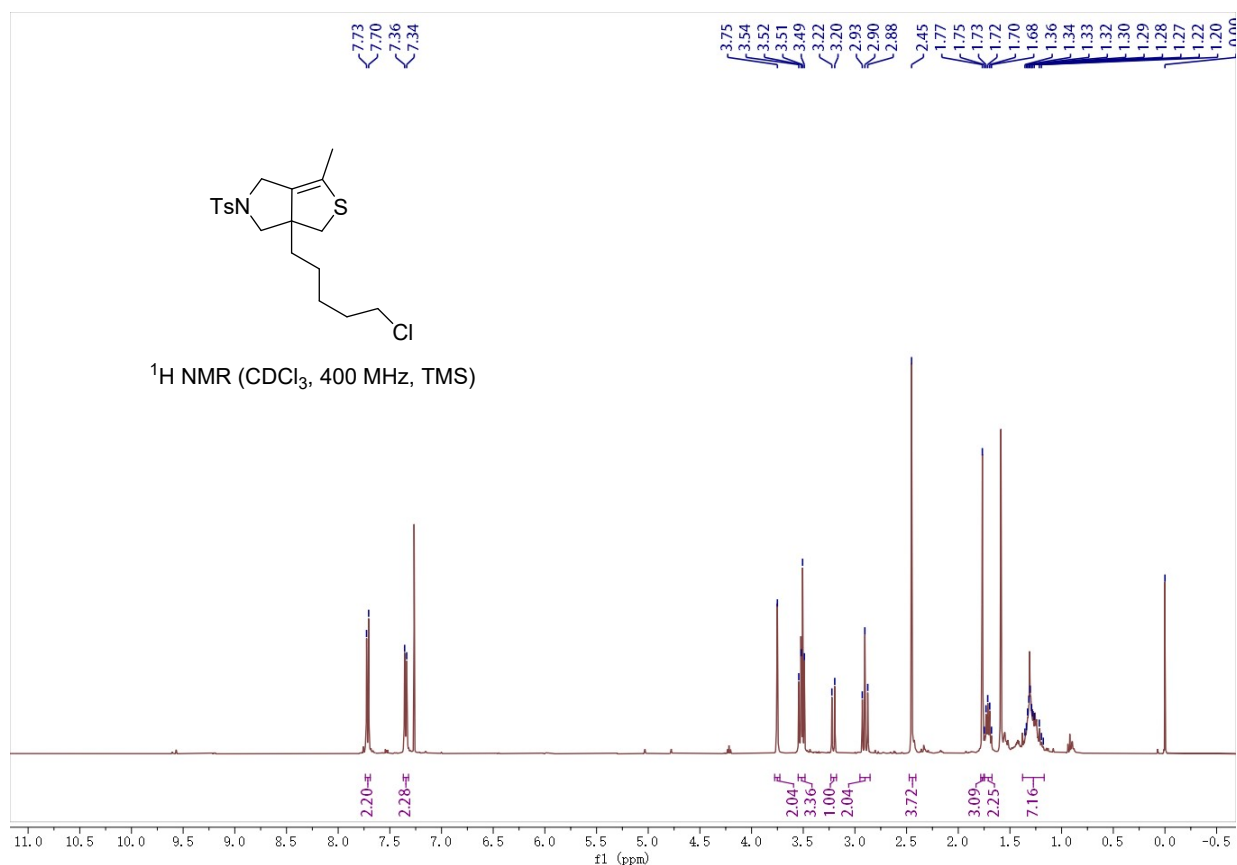

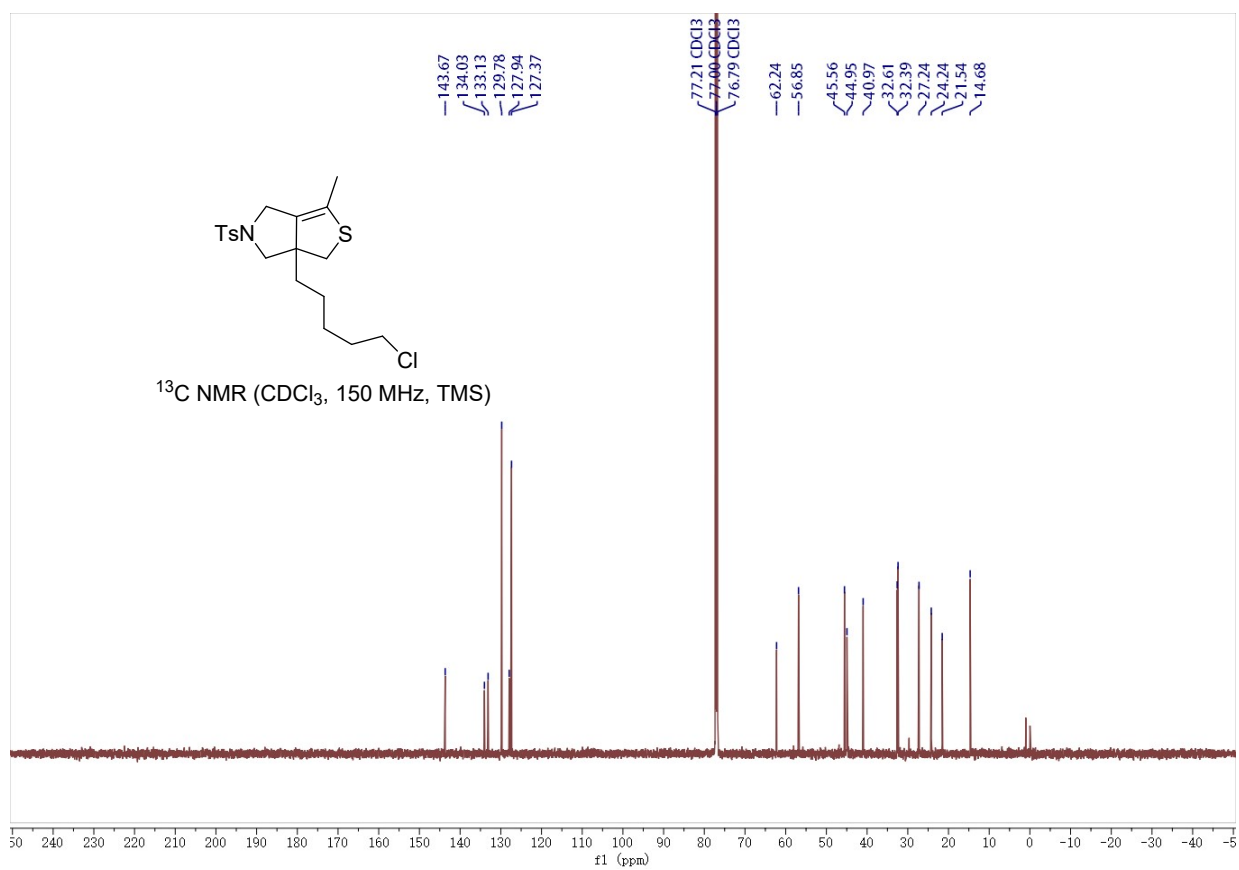

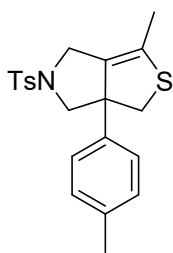

### 3-methyl-6a-(p-tolyl)-5-tosyl-4,5,6,6a-tetrahydro-1H-thieno[3,4-c]pyrrole (3n)

A colorless oil, 32.8 mg, 85% yield.  $^1\text{H}$  NMR ( $\text{CDCl}_3$ , TMS, 600 MHz)  $\delta$  7.47 (d,  $J = 8.3$  Hz, 2H), 7.12 (d,  $J = 8.0$  Hz, 2H), 7.08 – 7.02 (m, 4H), 4.07 (d,  $J = 9.6$  Hz, 1H), 3.89 (d,  $J = 13.4$  Hz, 1H), 3.75 – 3.70 (m, 1H), 3.66 (d,  $J = 11.0$  Hz, 1H), 3.38 (d,  $J = 9.6$  Hz, 1H), 2.99 (d,  $J = 10.9$  Hz, 1H), 2.38 (s, 3H), 2.33 (s, 3H), 1.92 (s, 3H).  $^{13}\text{C}$  NMR ( $\text{CDCl}_3$ , TMS, 150 MHz)  $\delta$  143.2, 138.3, 136.9, 134.0, 132.1, 131.3, 129.42, 129.38, 127.2, 125.9, 66.0, 60.5, 46.1, 46.0, 21.5, 21.1, 14.8. IR (Acetone)  $\nu$  659, 841, 1094, 1159, 1346, 1510, 1598, 2914  $\text{cm}^{-1}$ . HRMS (ESI) calcd. for  $\text{C}_{21}\text{H}_{24}\text{O}_2\text{NS}_2$  (M+H): 386.1243, Found: 386.1228.

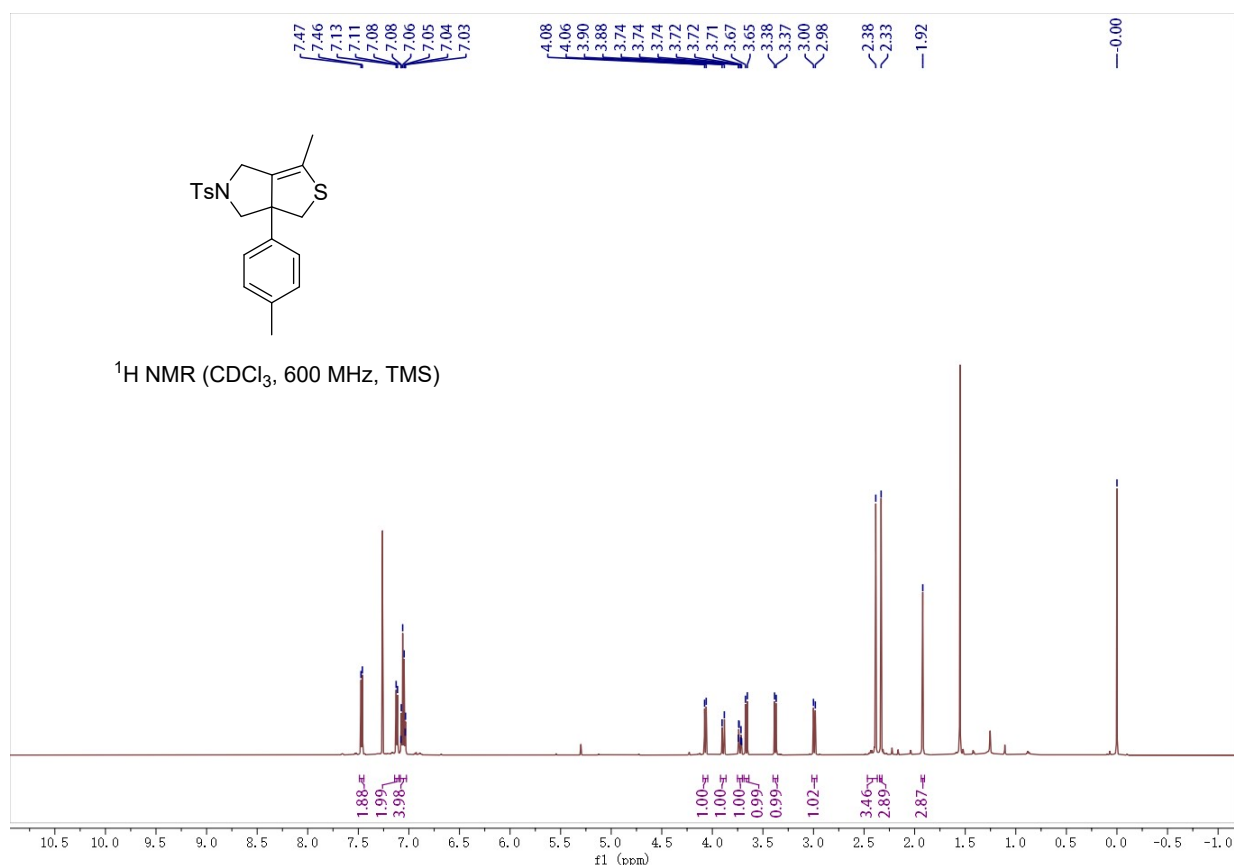

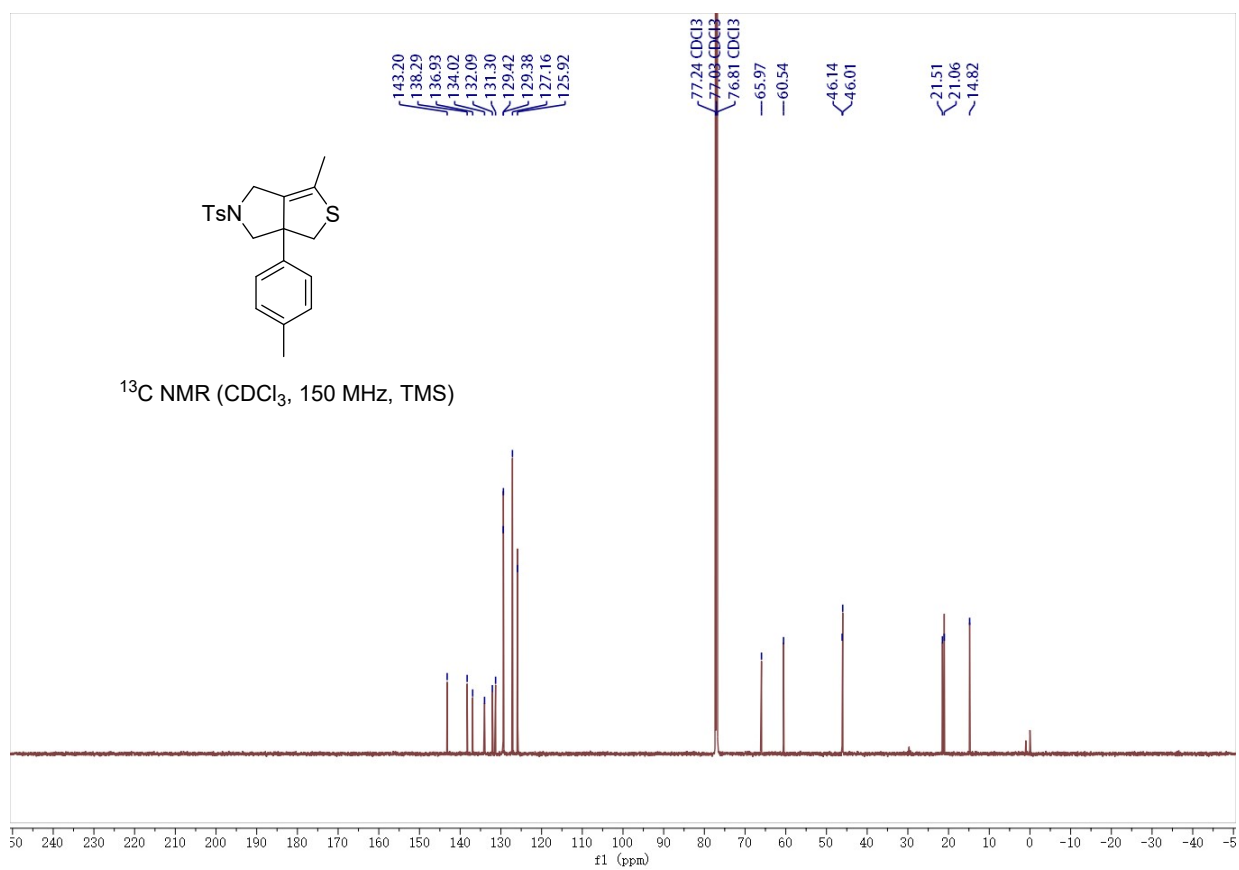

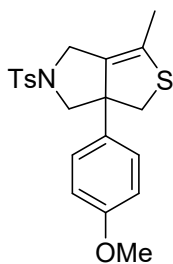

**6a-(4-methoxyphenyl)-3-methyl-5-tosyl-4,5,6,6a-tetrahydro-1H-thieno[3,4-c]pyrrole (3o)**

A colorless oil, 32.5 mg, 82% yield.  $^1\text{H}$  NMR ( $\text{CDCl}_3$ , TMS, 600 MHz)  $\delta$  7.47 (d,  $J = 8.2$  Hz, 2H), 7.16 – 7.05 (m, 4H), 6.76 (d,  $J = 8.7$  Hz, 2H), 4.05 (d,  $J = 9.6$  Hz, 1H), 3.90 (d,  $J = 13.3$  Hz, 1H), 3.80 (s, 3H), 3.75 – 3.69 (m, 1H), 3.66 (d,  $J = 10.9$  Hz, 1H), 3.38 (d,  $J = 9.6$  Hz, 1H), 2.97 (d,  $J = 10.8$  Hz, 1H), 2.38 (s, 3H), 1.92 (s, 3H).  $^{13}\text{C}$  NMR ( $\text{CDCl}_3$ , TMS, 150 MHz)  $\delta$  158.8, 143.2, 134.0, 133.1, 132.2, 131.2, 129.5, 127.1, 114.1, 65.7, 60.5, 55.2, 46.1, 45.9, 21.4, 14.8. IR (Acetone)  $\nu$  890, 1120, 1209, 1533, 1700, 2903  $\text{cm}^{-1}$ . HRMS (ESI) calcd. for  $\text{C}_{21}\text{H}_{23}\text{O}_3\text{NNaS}_2$  ( $\text{M}+\text{Na}$ ): 424.1012, Found: 424.1005.

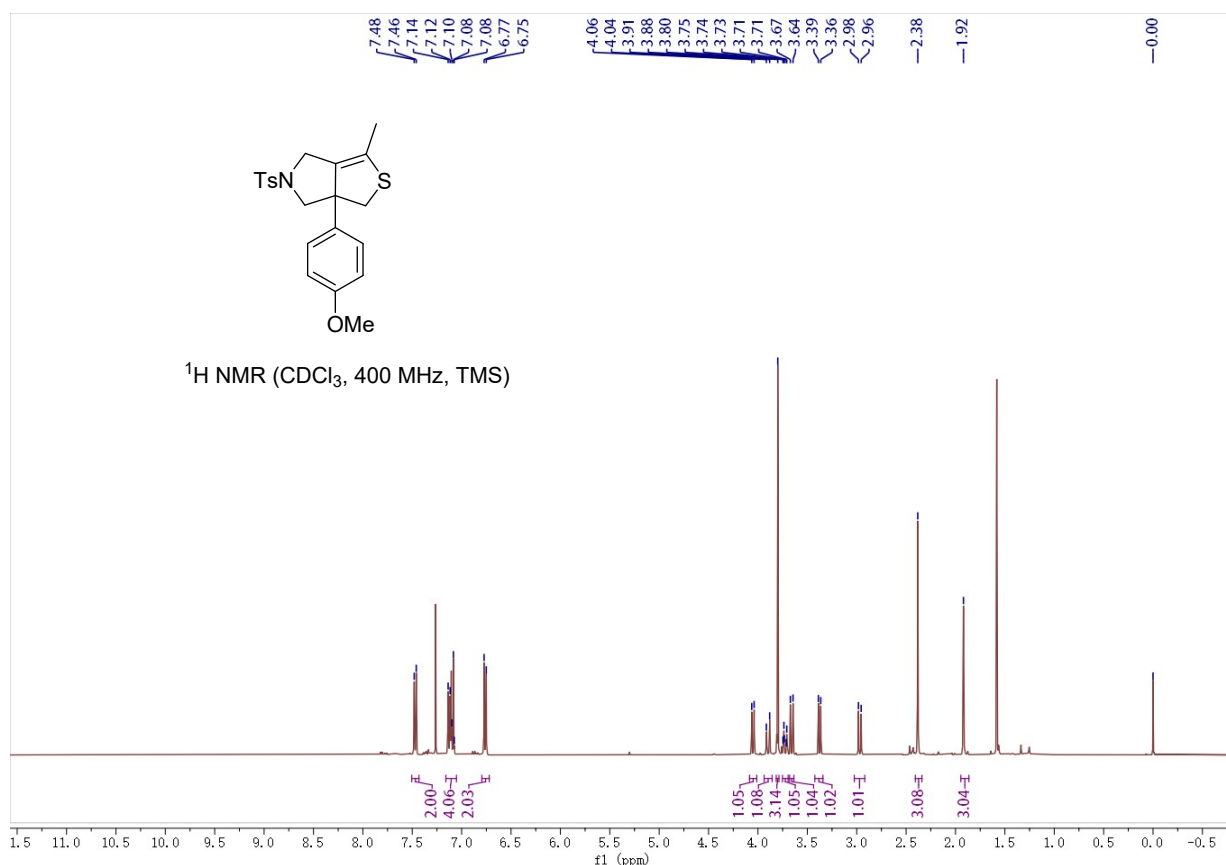

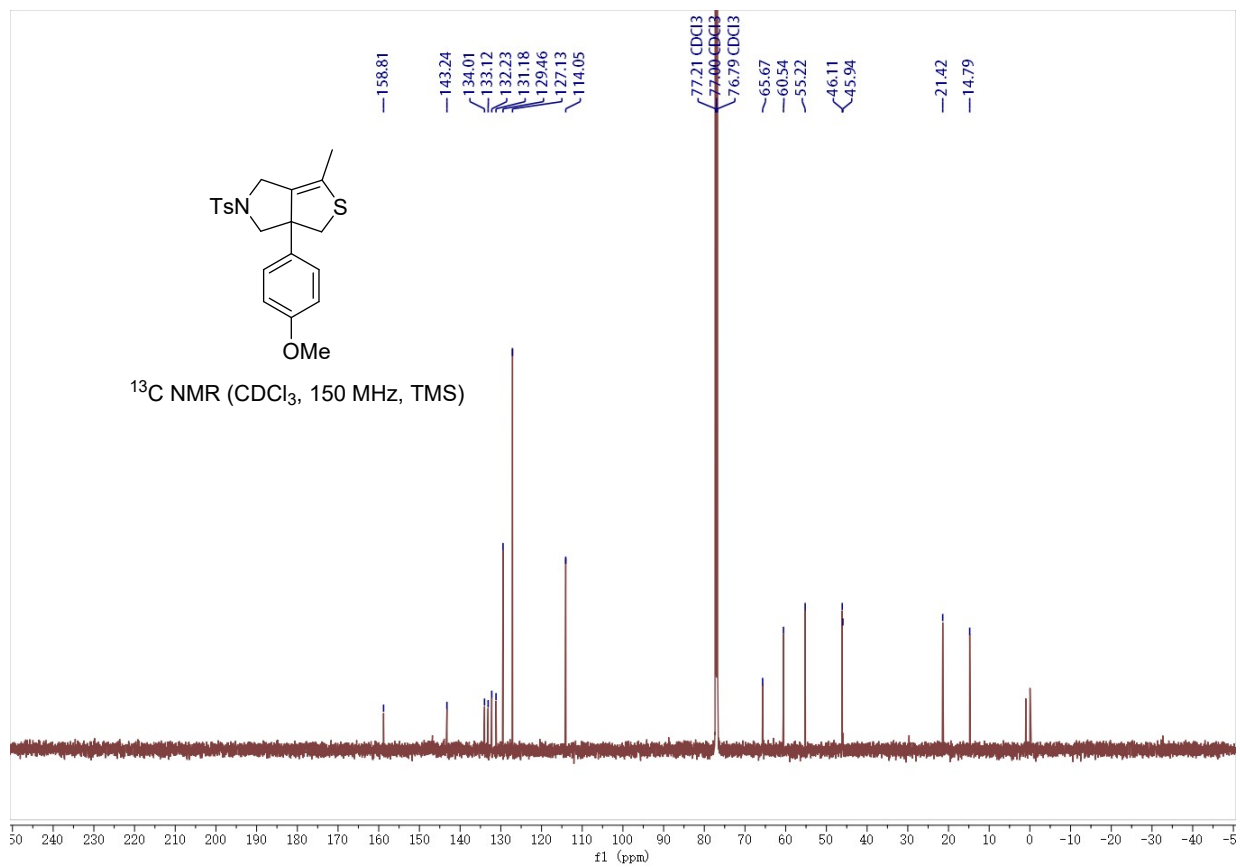

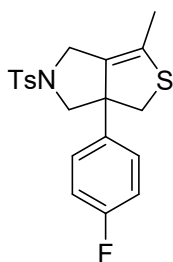

**6a-(4-fluorophenyl)-3-methyl-5-tosyl-4,5,6,6a-tetrahydro-1H-thieno[3,4-c]pyrrole (3p)**

A colorless oil, 30.0 mg, 77% yield.  $^1\text{H}$  NMR ( $\text{CDCl}_3$ , TMS, 600 MHz)  $\delta$  7.46 (d,  $J = 8.3$  Hz, 2H), 7.15 – 7.10 (m, 4H), 6.94 – 6.87 (m, 2H), 4.03 (d,  $J = 9.9$  Hz, 1H), 3.92 (d,  $J = 13.5$  Hz, 1H), 3.73 (d,  $J = 13.4$  Hz, 1H), 3.68 (d,  $J = 11.0$  Hz, 1H), 3.41 (d,  $J = 9.9$  Hz, 1H), 2.95 (d,  $J = 10.9$  Hz, 1H), 2.39 (s, 3H), 1.93 (s, 3H).  $^{13}\text{C}$  NMR ( $\text{CDCl}_3$ , TMS, 100 MHz)  $\delta$  162.1 (d,  $J = 245.0$  Hz), 143.5, 137.0 (d,  $J = 4.0$  Hz), 134.0, 131.9 (d,  $J = 7.0$  Hz), 129.5, 127.8, 127.7, 127.1, 115.5 (d,  $J = 22.0$  Hz), 65.8, 60.6, 46.04, 45.96, 21.4, 14.8.  $^{19}\text{F}$  NMR ( $\text{CDCl}_3$ , TMS, 376 MHz)  $\delta$  -115.4 (s). IR (Acetone)  $\nu$  611, 803, 1059, 1349, 1528, 2949  $\text{cm}^{-1}$ . HRMS (ESI) calcd. for  $\text{C}_{20}\text{H}_{21}\text{O}_2\text{NFS}_2$  (M+H): 390.0992, Found: 390.0980.

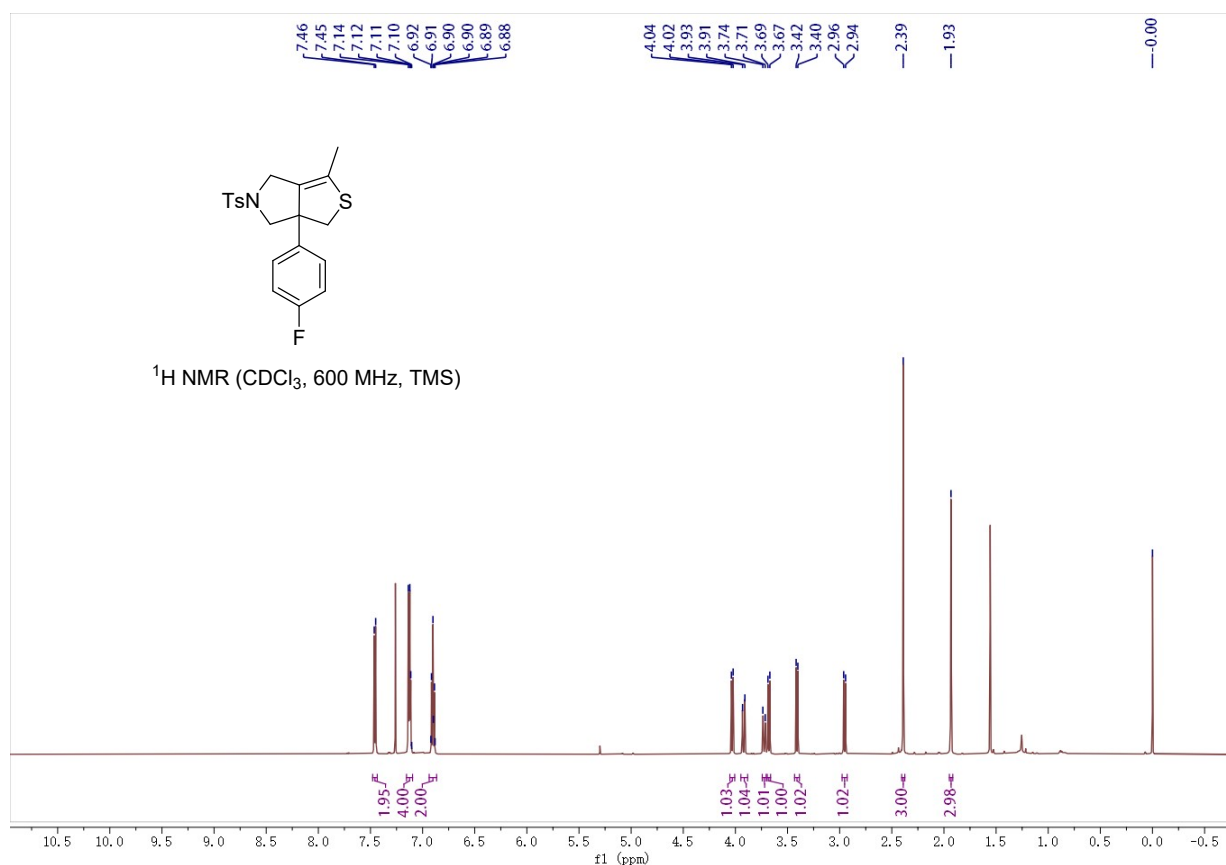

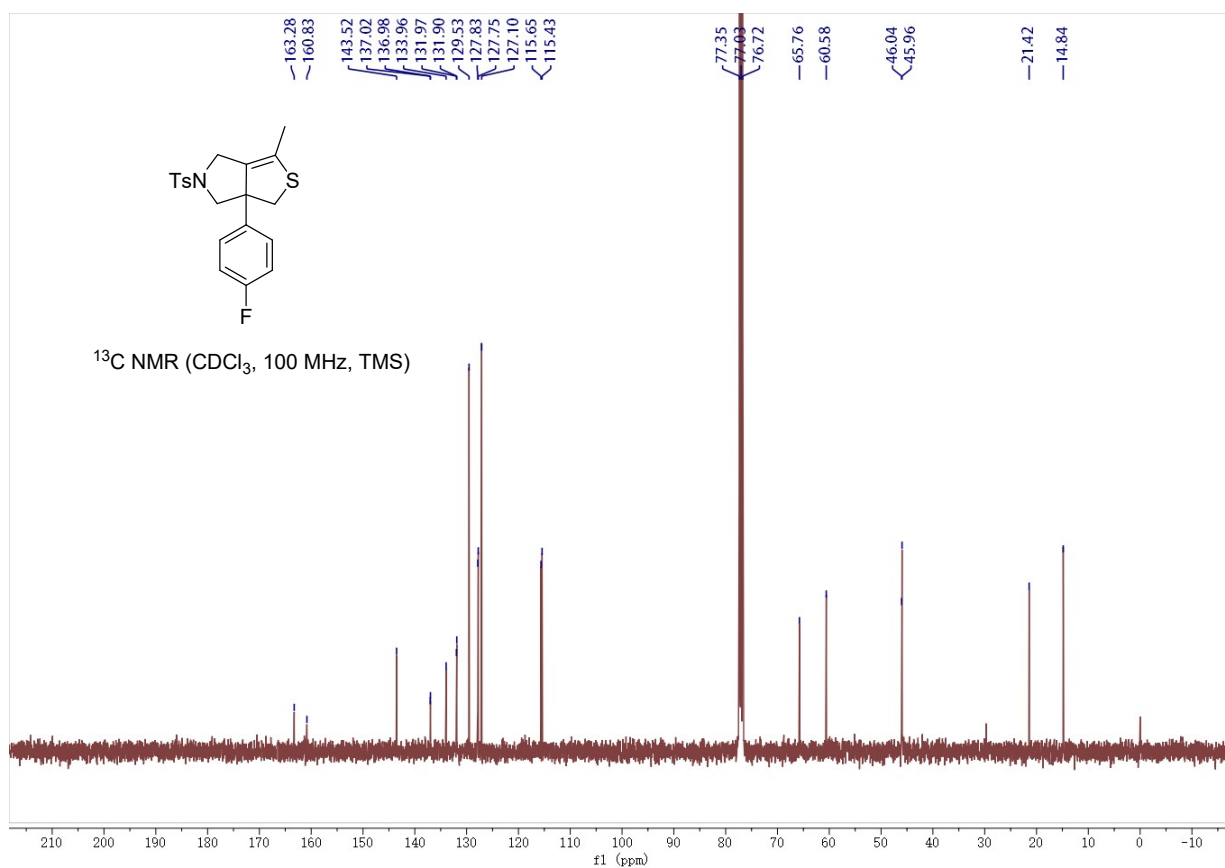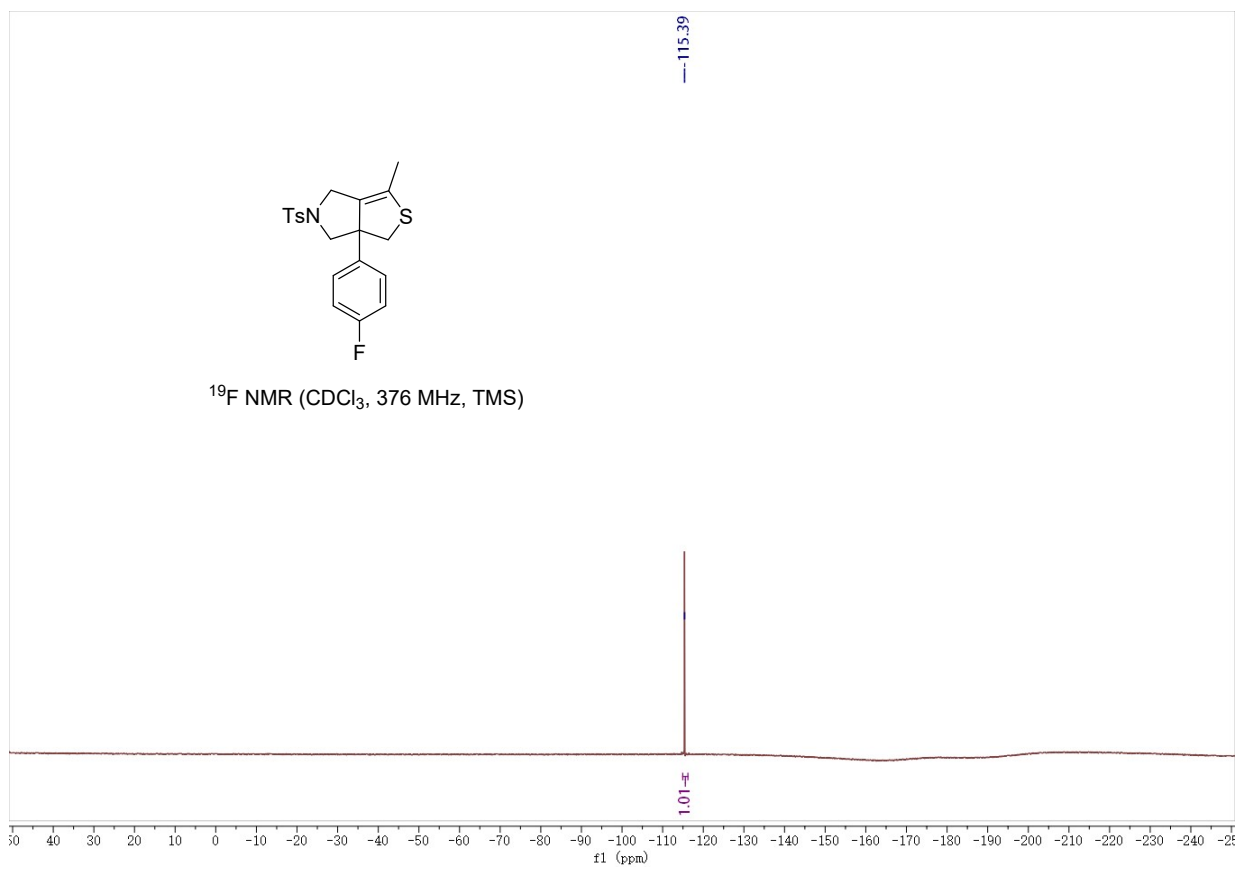



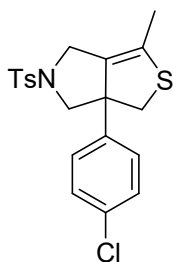

**6a-(4-chlorophenyl)-3-methyl-5-tosyl-4,5,6,6a-tetrahydro-1H-thieno[3,4-c]pyrrole (3q)**

A colorless oil, 35.7 mg, 88% yield.  $^1\text{H}$  NMR ( $\text{CDCl}_3$ , TMS, 600 MHz)  $\delta$  7.43 (d,  $J = 8.3$  Hz, 2H), 7.17 (d,  $J = 8.5$  Hz, 2H), 7.11 (d,  $J = 8.0$  Hz, 2H), 7.07 (d,  $J = 8.5$  Hz, 2H), 4.03 (d,  $J = 10.1$  Hz, 1H), 3.94 (d,  $J = 13.6$  Hz, 1H), 3.74 – 3.65 (m, 2H), 3.44 (d,  $J = 10.1$  Hz, 1H), 2.94 (d,  $J = 11.0$  Hz, 1H), 2.41 (s, 3H), 1.94 (s, 3H).  $^{13}\text{C}$  NMR ( $\text{CDCl}_3$ , TMS, 100 MHz)  $\delta$  143.6, 139.9, 133.9, 133.2, 132.3, 131.6, 129.4, 128.8, 127.6, 127.0, 65.8, 60.5, 45.92, 45.87, 21.5, 14.8. IR (Acetone)  $\nu$  863, 1125, 1396, 1600, 2908  $\text{cm}^{-1}$ . HRMS (ESI) calcd. for  $\text{C}_{20}\text{H}_{21}\text{O}_2\text{NCIS}_2$  (M+H): 406.0697, Found: 406.0684.

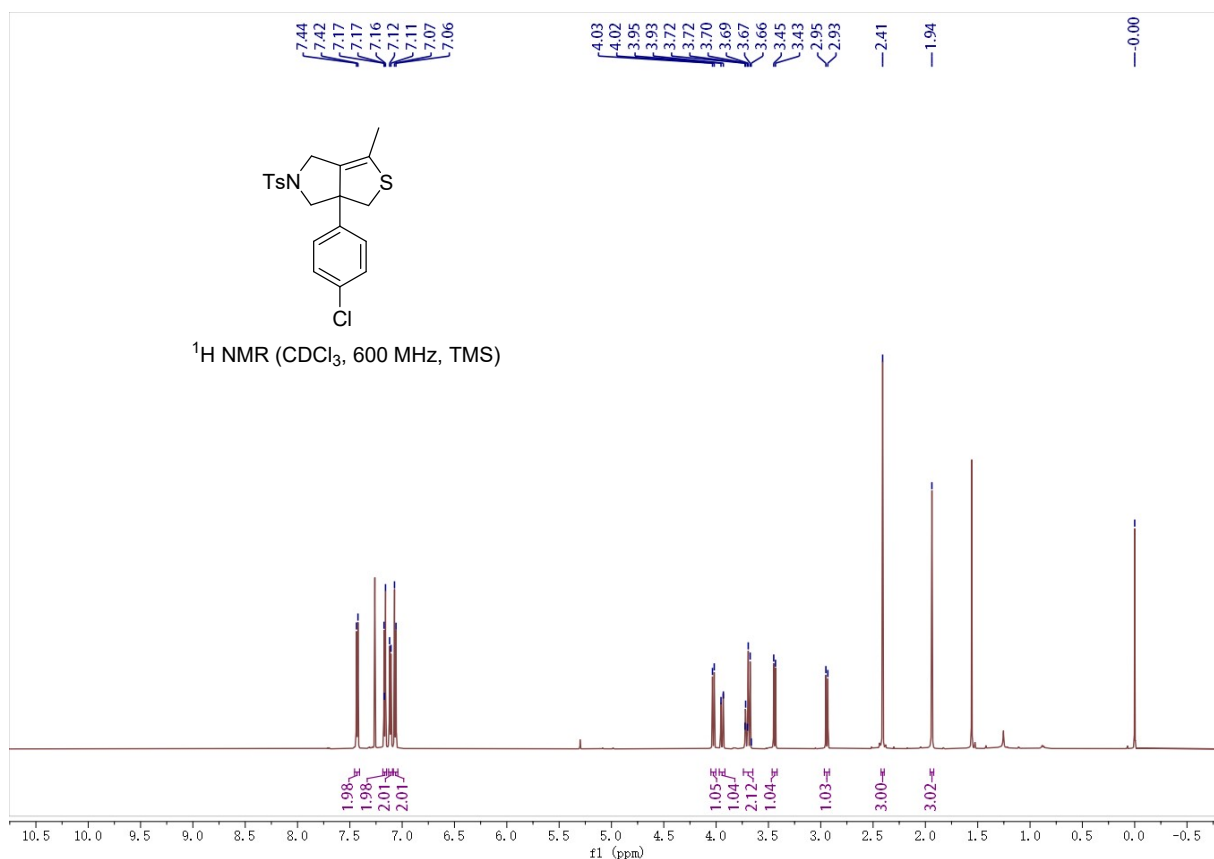

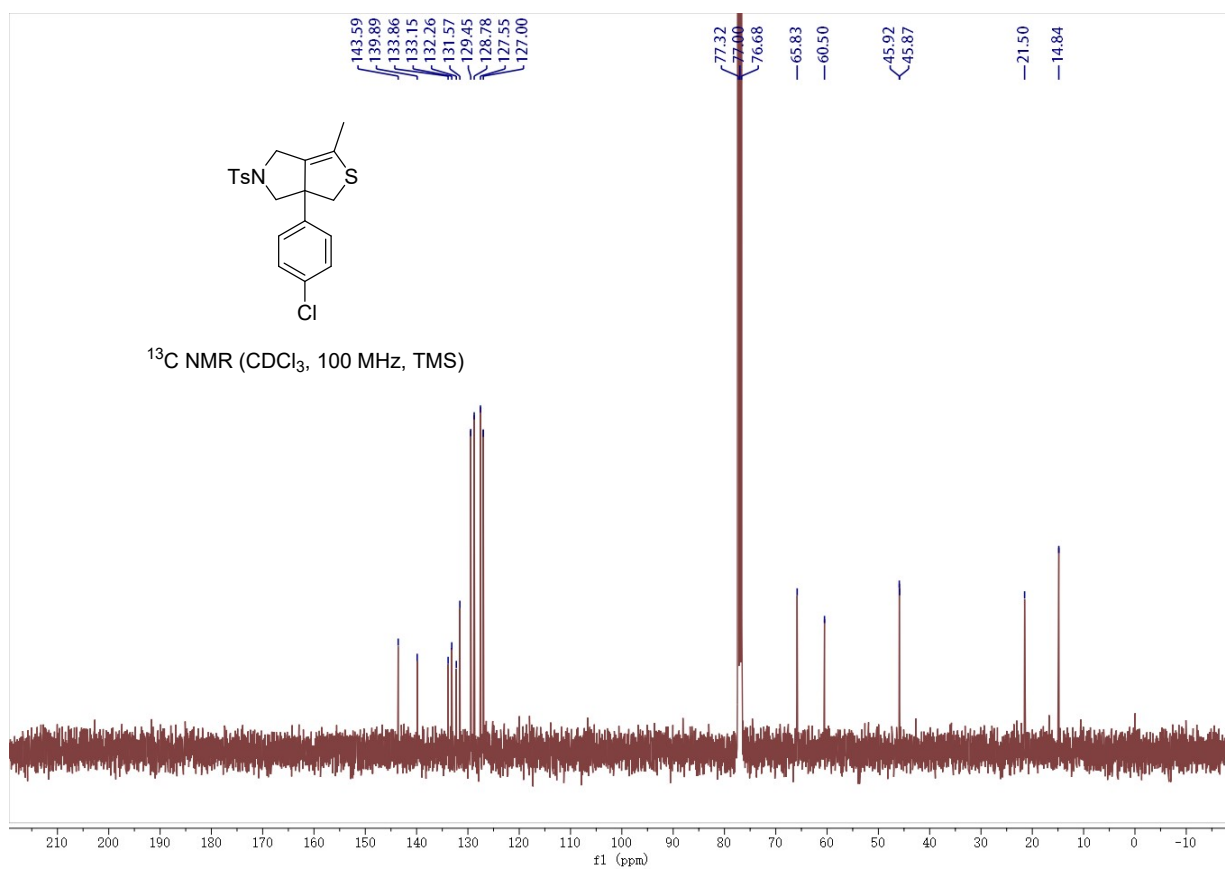

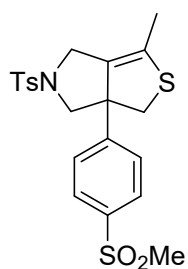

**3-methyl-6a-(4-(methylsulfonyl)phenyl)-5-tosyl-4,5,6,6a-tetrahydro-1H-thieno[3,4-c]pyrrole (3r)**

A colorless oil, 36.0 mg, 80% yield.  $^1\text{H}$  NMR ( $\text{CDCl}_3$ , TMS, 400 MHz)  $\delta$  7.83 (d,  $J = 8.5$  Hz, 2H), 7.49 (d,  $J = 8.3$  Hz, 2H), 7.42 (d,  $J = 8.5$  Hz, 2H), 7.18 (d,  $J = 7.9$  Hz, 2H), 4.09 (d,  $J = 9.8$  Hz, 1H), 3.89 (d,  $J = 13.6$  Hz, 1H), 3.81 – 3.69 (m, 2H), 3.40 (d,  $J = 9.9$  Hz, 1H), 3.06 (s, 3H), 2.98 (d,  $J = 11.2$  Hz, 1H), 2.41 (s, 3H), 1.96 (s, 3H).  $^{13}\text{C}$  NMR ( $\text{CDCl}_3$ , TMS, 150 MHz)  $\delta$  143.6, 143.3, 140.5, 139.8, 135.4, 129.3, 128.1, 127.6, 127.4, 120.3, 82.3, 70.8, 49.9, 44.5, 36.2, 21.5, 3.2. IR (Acetone)  $\nu$  1012, 1125, 1319, 1400, 1608, 2933  $\text{cm}^{-1}$ . HRMS (ESI) calcd. for  $\text{C}_{21}\text{H}_{24}\text{NO}_4\text{S}_3$  (M+H): 450.0867, Found: 450.0909.

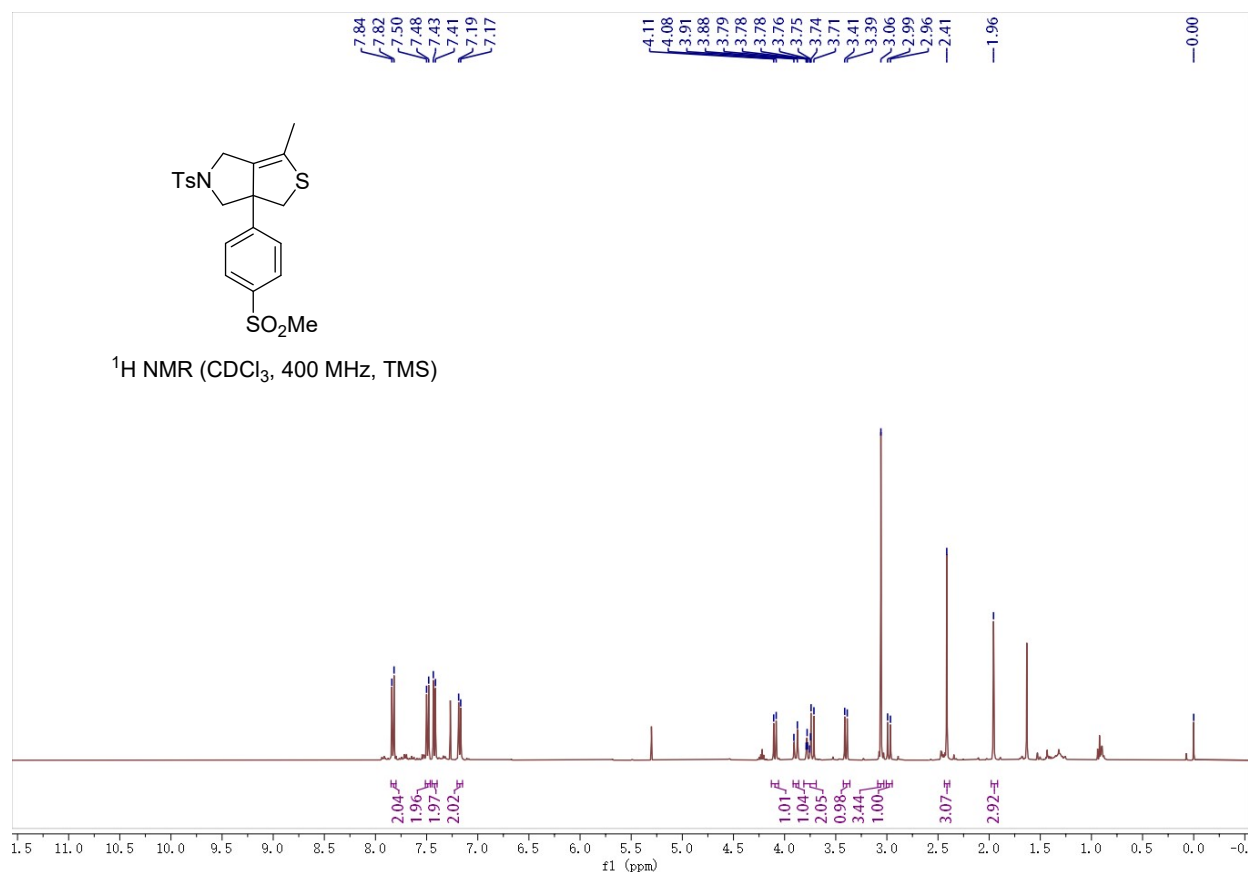

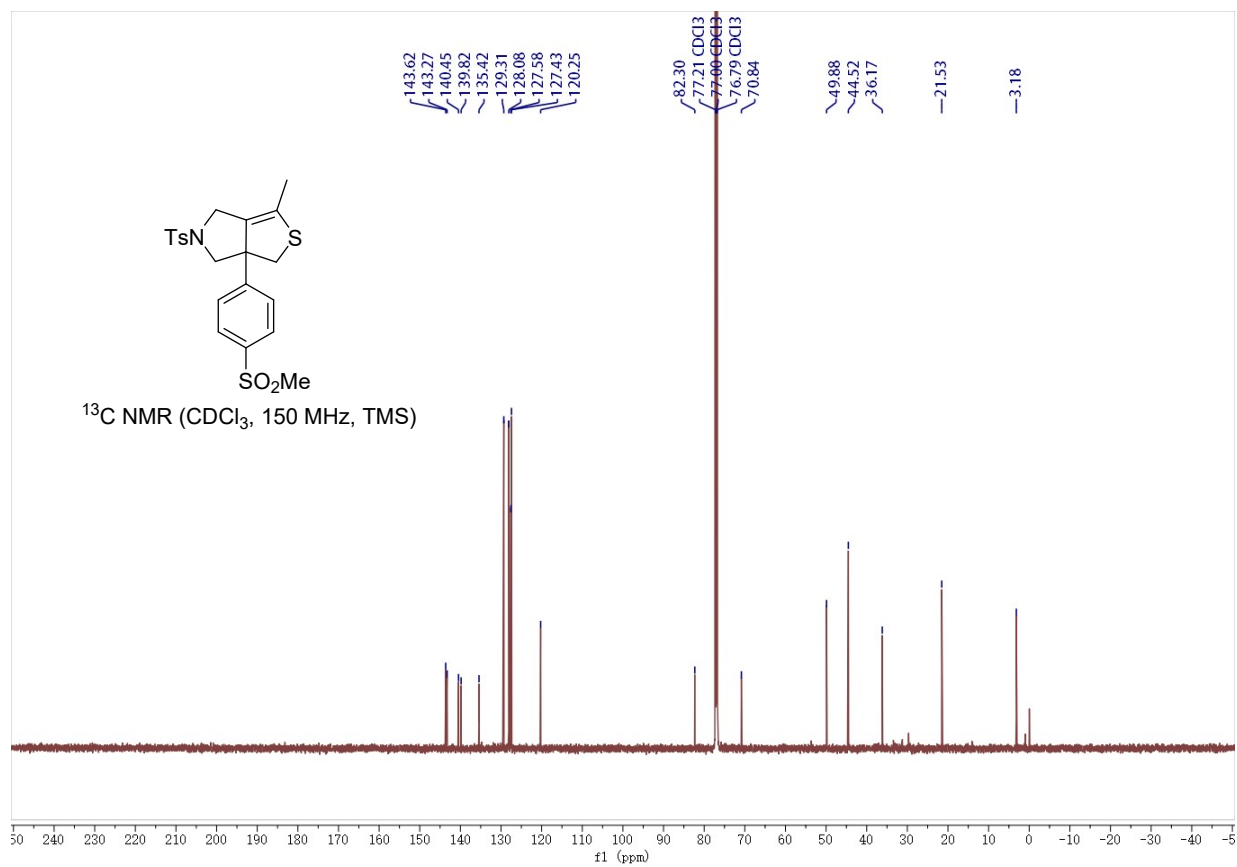

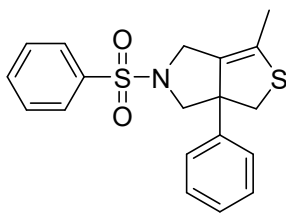

### 3-methyl-6a-phenyl-5-(phenylsulfonyl)-4,5,6,6a-tetrahydro-1H-thieno[3,4-c]pyrrole (3s)

A colorless oil, 30.0 mg, 84% yield.  $^1\text{H}$  NMR ( $\text{CDCl}_3$ , TMS, 600 MHz)  $\delta$  7.62 – 7.55 (m, 2H), 7.51 – 7.44 (m, 1H), 7.38 – 7.31 (m, 2H), 7.28 – 7.18 (m, 5H), 4.12 (d,  $J = 9.6$  Hz, 1H), 3.92 (d,  $J = 13.2$  Hz, 1H), 3.77 – 3.73 (m, 1H), 3.69 (d,  $J = 11.0$  Hz, 1H), 3.42 (d,  $J = 9.6$  Hz, 1H), 3.03 (d,  $J = 11.0$  Hz, 1H), 1.93 (s, 3H).  $^{13}\text{C}$  NMR ( $\text{CDCl}_3$ , TMS, 150 MHz)  $\delta$  149.7, 142.0, 141.3, 137.0, 136.5, 133.0, 132.6, 131.72, 131.69, 129.2, 128.9, 128.8, 127.5, 127.42, 127.39, 127.1, 126.0, 125.7, 104.3, 66.2, 60.5, 59.4, 56.9, 56.4, 52.5, 46.0, 43.0, 14.8. IR (Acetone)  $\nu$  719, 1042, 1129, 1301, 2980  $\text{cm}^{-1}$ . HRMS (ESI) calcd. for  $\text{C}_{19}\text{H}_{19}\text{O}_2\text{NNaS}$  ( $\text{M}+\text{Na}$ ): 380.0749, Found: 380.0742.

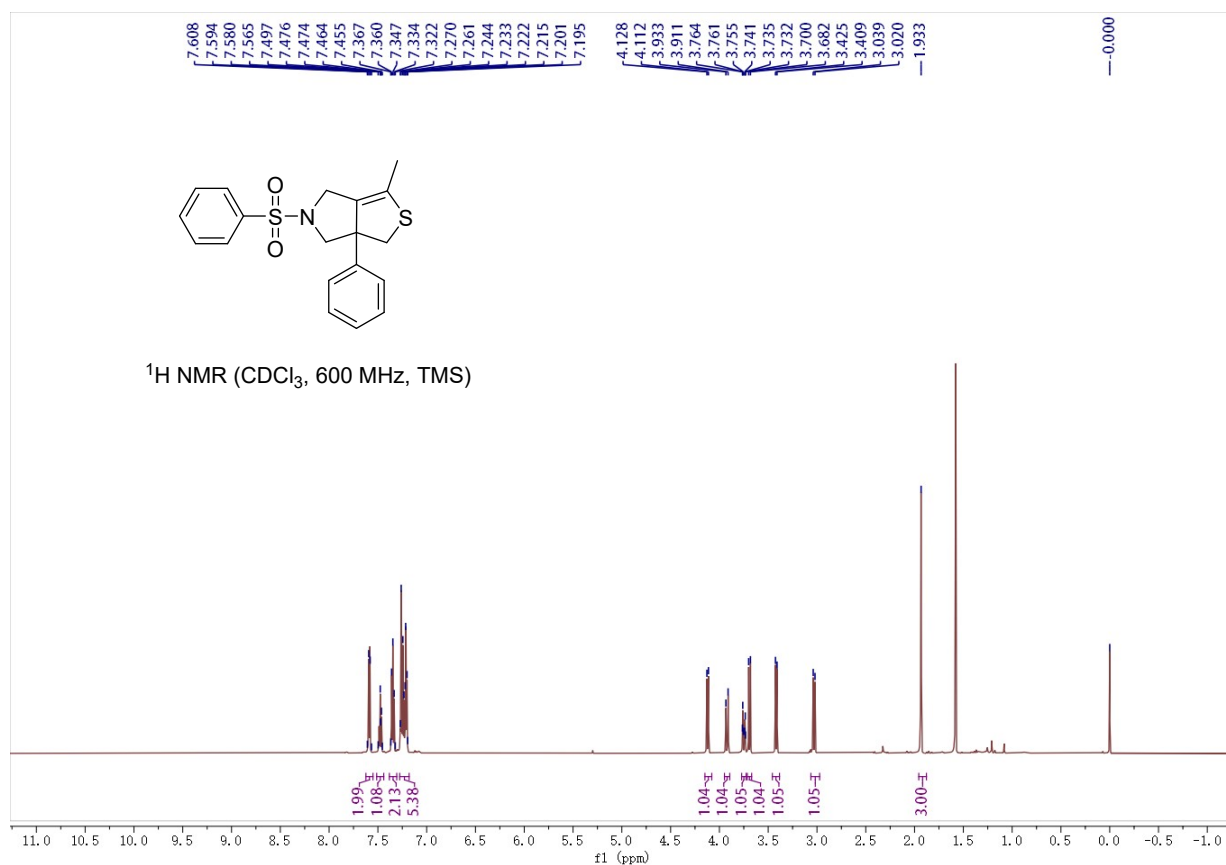

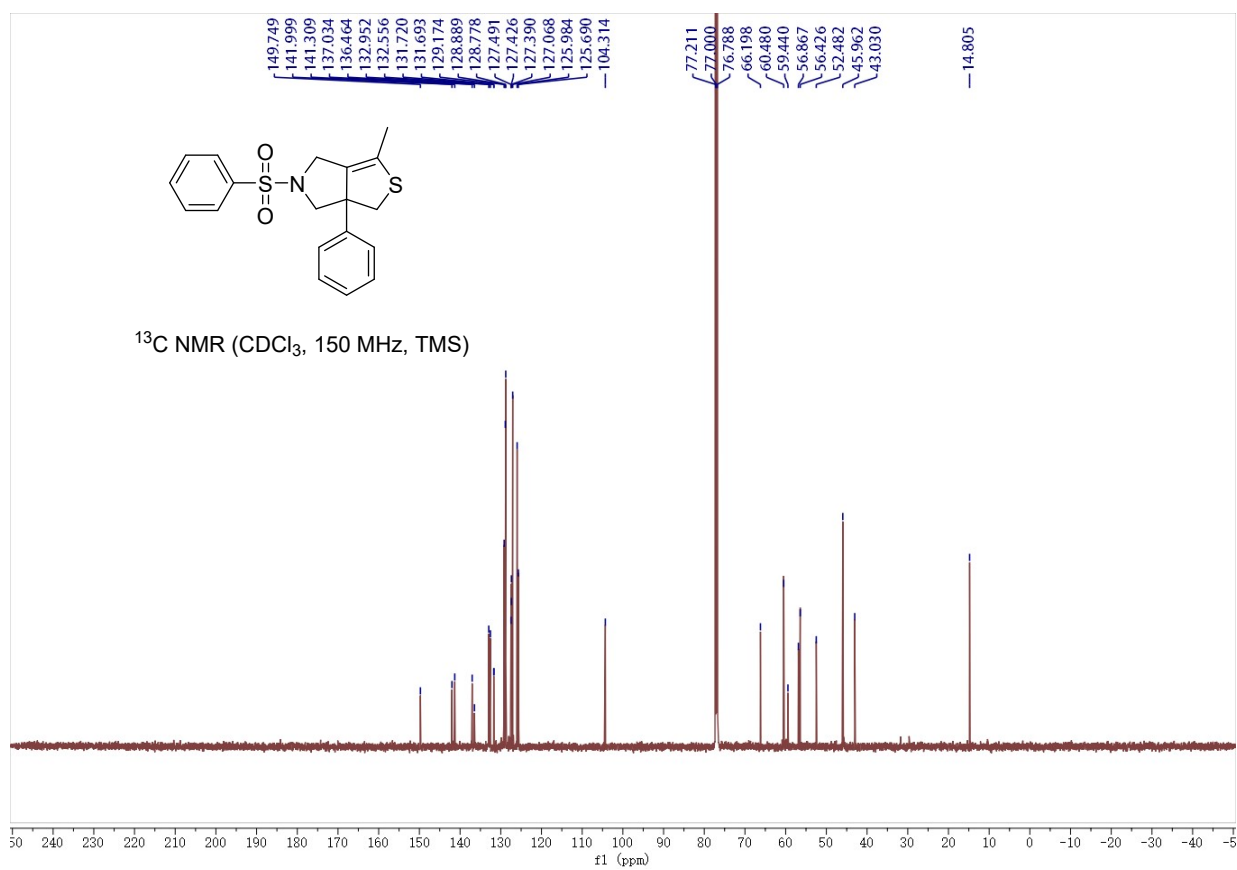

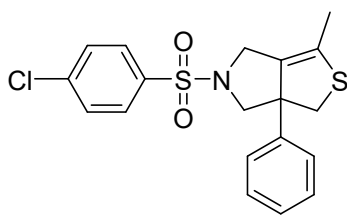

**5-((4-chlorophenyl)sulfonyl)-3-methyl-6a-phenyl-4,5,6,6a-tetrahydro-1H-thieno[3,4-c]pyrrole (3t)**

A colorless oil, 31.4 mg, 80% yield.  $^1\text{H}$  NMR ( $\text{CDCl}_3$ , TMS, 600 MHz)  $\delta$  7.44 (d,  $J = 8.5$  Hz, 2H), 7.28 – 7.19 (m, 5H), 7.12 (d,  $J = 6.6$  Hz, 2H), 4.08 (d,  $J = 10.0$  Hz, 1H), 3.97 (d,  $J = 13.3$  Hz, 1H), 3.71 (d,  $J = 11.2$  Hz, 2H), 3.49 (d,  $J = 10.0$  Hz, 1H), 3.01 (d,  $J = 11.0$  Hz, 1H), 1.95 (s, 3H).  $^{13}\text{C}$  NMR ( $\text{CDCl}_3$ , TMS, 150 MHz)  $\delta$  141.2, 139.0, 135.6, 132.4, 131.3, 129.1, 128.9, 128.3, 127.4, 126.1, 66.3, 60.9, 46.1, 46.0, 14.9. IR (Acetone)  $\nu$  685, 1078, 1371, 2944  $\text{cm}^{-1}$ . HRMS (ESI) calcd. for  $\text{C}_{19}\text{H}_{19}\text{O}_2\text{NCIS}_2$  ( $\text{M}+\text{H}$ ): 392.0540, Found: 392.0534.

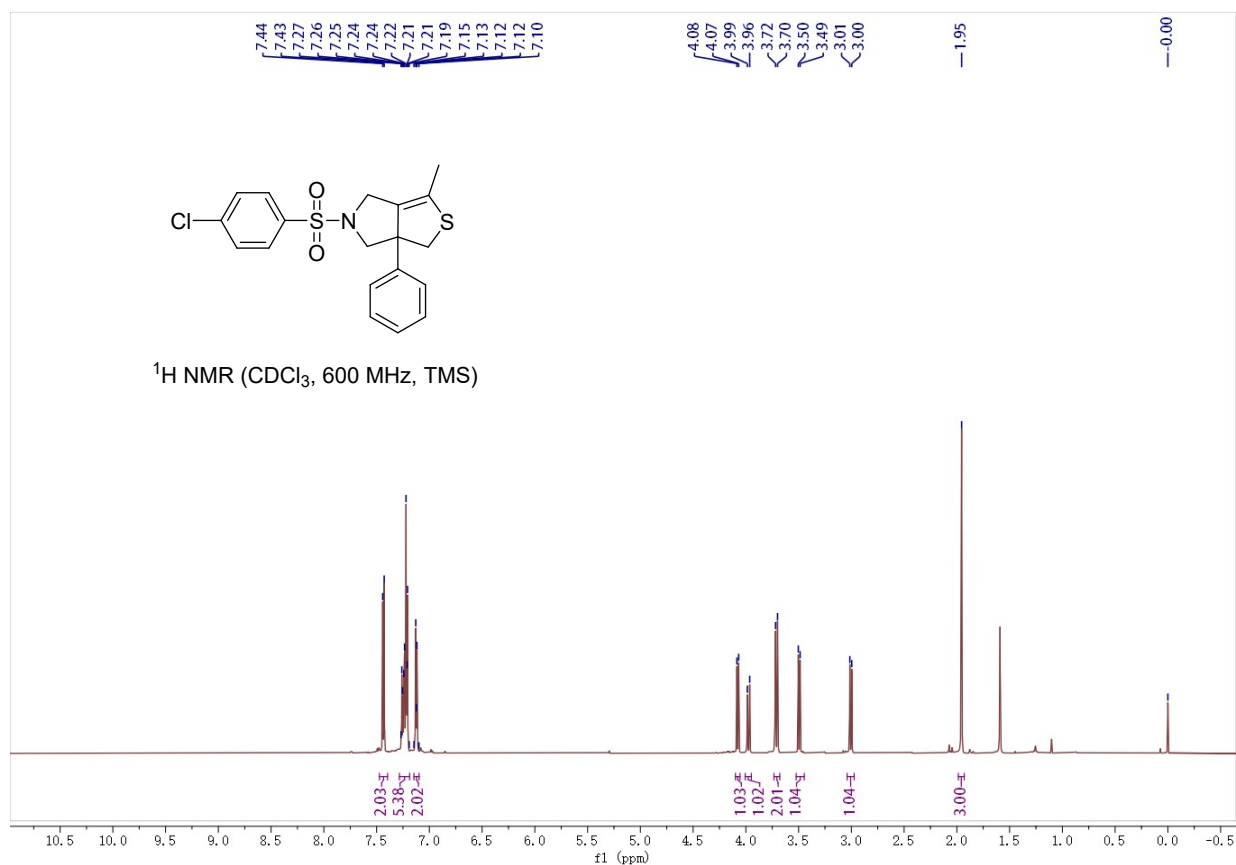

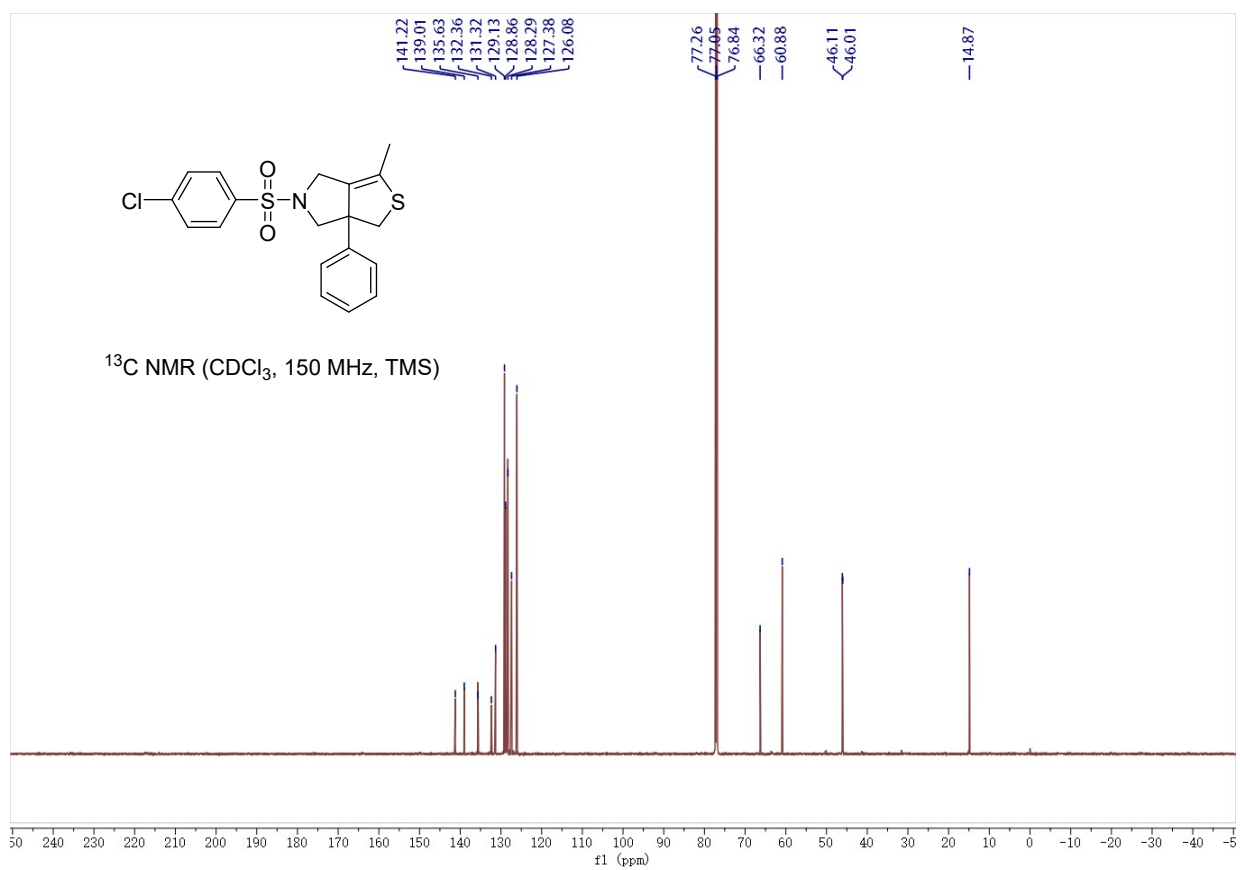



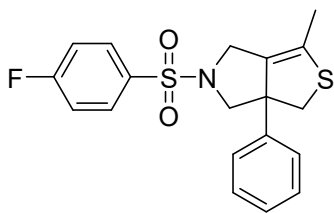

**5-ethyl-3a-(4-methoxyphenyl)-6a-phenyl-6-(phenylthio)-2-tosyl-1,2,3,3a,4,6a-hexahydrocyclopenta[c]pyrrole (3u)**

A colorless oil, 29.3 mg, 78% yield.  $^1\text{H}$  NMR ( $\text{CDCl}_3$ , TMS, 600 MHz)  $\delta$  7.57 – 7.50 (m, 2H), 7.28 – 7.21 (m, 3H), 7.19 – 7.11 (m, 2H), 6.94 (t,  $J = 8.5$  Hz, 2H), 4.09 (d,  $J = 9.9$  Hz, 1H), 3.96 (d,  $J = 13.3$  Hz, 1H), 3.71 (d,  $J = 10.9$  Hz, 2H), 3.48 (d,  $J = 9.9$  Hz, 1H), 3.01 (d,  $J = 11.0$  Hz, 1H), 1.95 (s, 3H).  $^{13}\text{C}$  NMR ( $\text{CDCl}_3$ , TMS, 150 MHz)  $\delta$  164.9 (d,  $J = 252.0$  Hz), 141.3, 133.3 (d,  $J = 4.5$  Hz), 132.2, 131.4, 129.6 (d,  $J = 9.0$  Hz), 128.8, 127.4, 126.1, 116.1 (d,  $J = 21.0$  Hz), 116.0, 66.3, 60.8, 46.03, 46.00, 14.8.  $^{19}\text{F}$  NMR ( $\text{CDCl}_3$ , TMS, 376 MHz)  $\delta$  -105.6 (s). IR (Acetone)  $\nu$  752, 1218, 1531, 3009  $\text{cm}^{-1}$ . HRMS (ESI) calcd. for  $\text{C}_{19}\text{H}_{19}\text{O}_2\text{NFS}_2$  (M+H): 376.0836, Found: 376.0826.

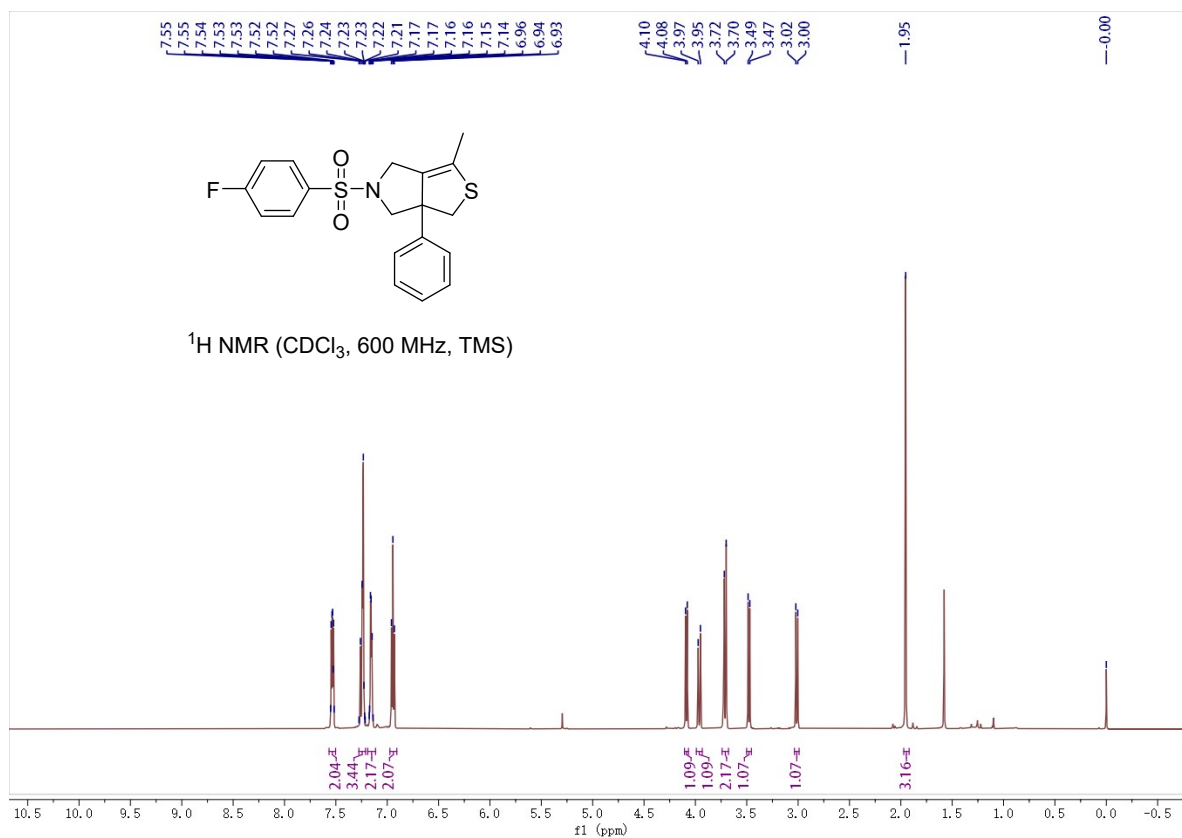

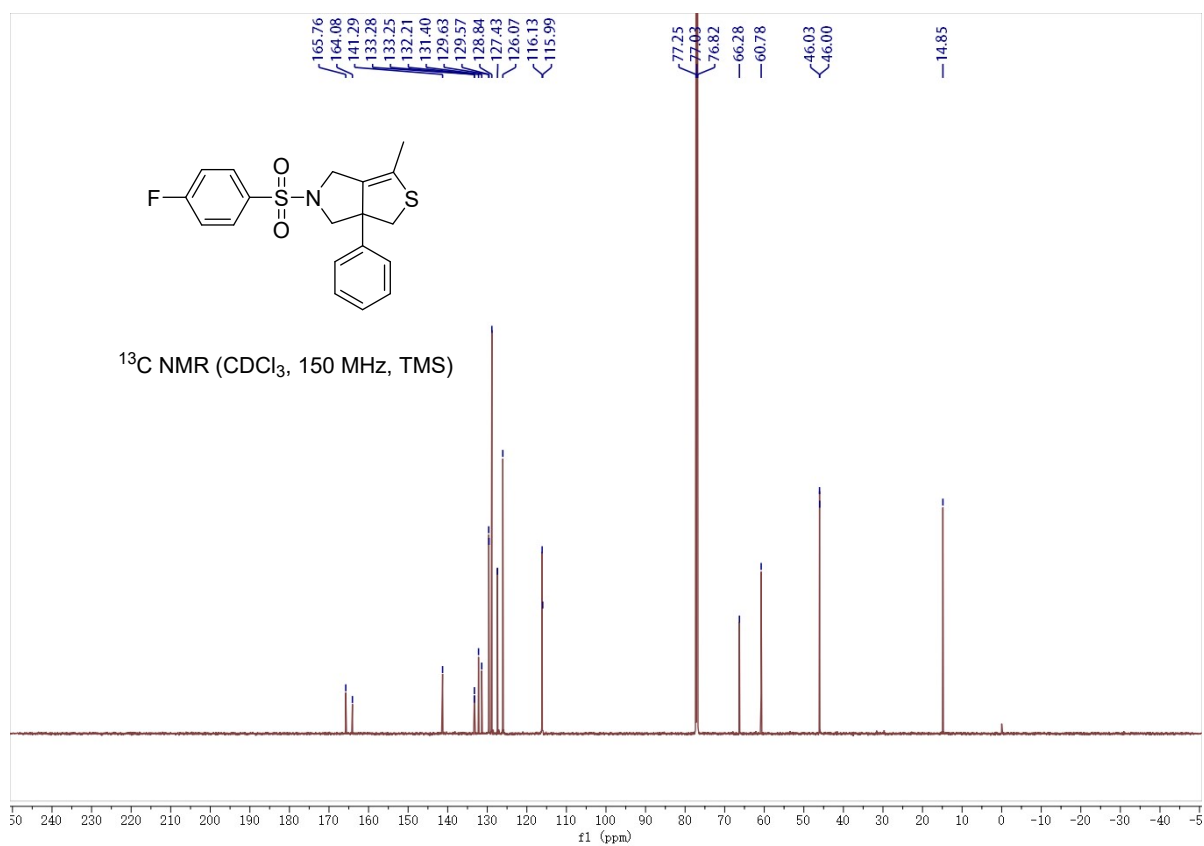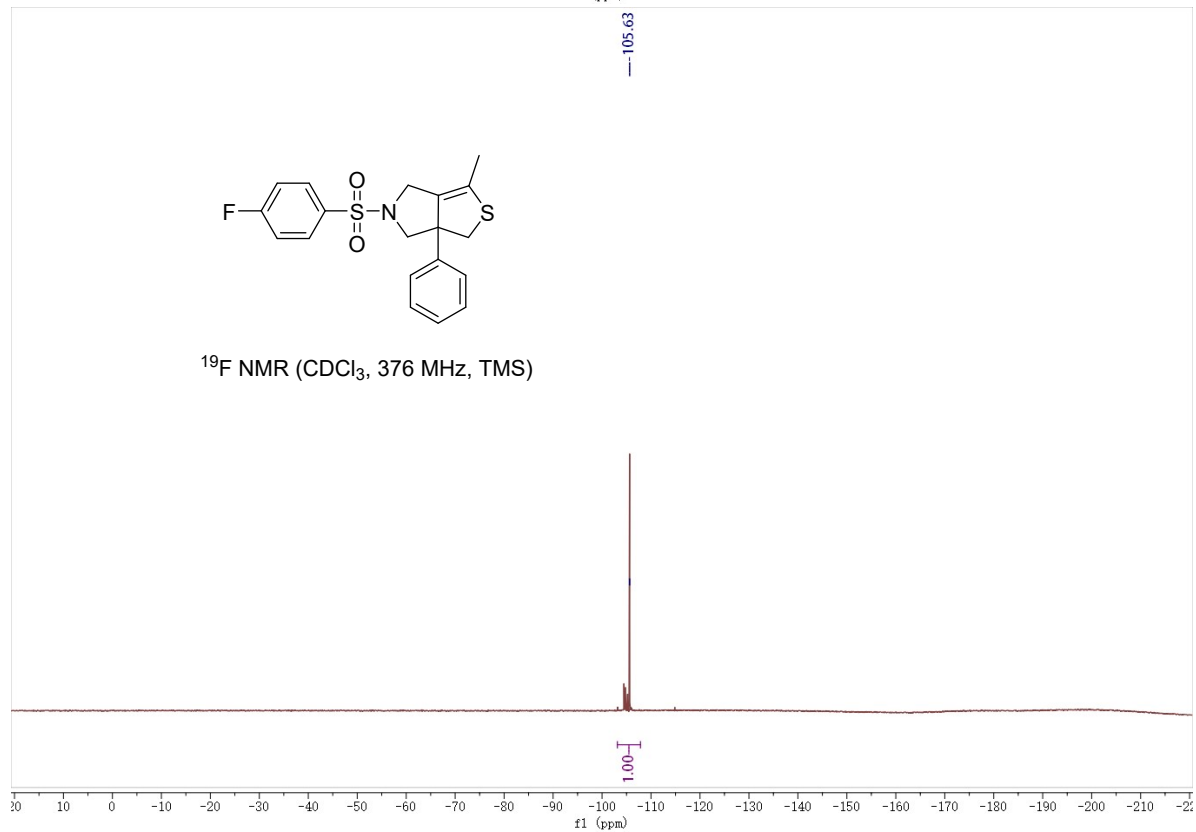

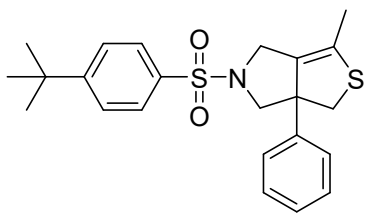

**5-((4-(*tert*-butyl)phenyl)sulfonyl)-3-methyl-6a-phenyl-4,5,6,6a-tetrahydro-1*H*-thieno[3,4-*c*]pyrrole (3v)**

A colorless oil, 25.6 mg, 62% yield.  $^1\text{H}$  NMR ( $\text{CDCl}_3$ , TMS, 600 MHz)  $\delta$  7.49 (d,  $J = 8.5$  Hz, 2H), 7.32 (d,  $J = 8.5$  Hz, 2H), 7.25 – 7.19 (m, 5H), 4.13 (d,  $J = 9.7$  Hz, 1H), 3.94 (d,  $J = 13.3$  Hz, 1H), 3.75 – 3.69 (m, 2H), 3.45 (d,  $J = 9.8$  Hz, 1H), 3.02 (d,  $J = 11.0$  Hz, 1H), 1.94 (s, 3H), 1.32 (s, 9H).  $^{13}\text{C}$  NMR  $\text{CDCl}_3$ , TMS, 150 MHz)  $\delta$  156.1, 141.5, 134.1, 132.0, 131.6, 128.7, 127.4, 127.0, 126.1, 125.9, 66.3, 60.6, 46.1, 46.0, 35.1, 31.1, 14.9. IR (Acetone)  $\nu$  1005, 1248, 1339, 1559, 2993  $\text{cm}^{-1}$ . HRMS (ESI) calcd. for  $\text{C}_{24}\text{H}_{26}\text{O}_4\text{NS}_2$  (M+H): 456.1298, Found: 456.1285.

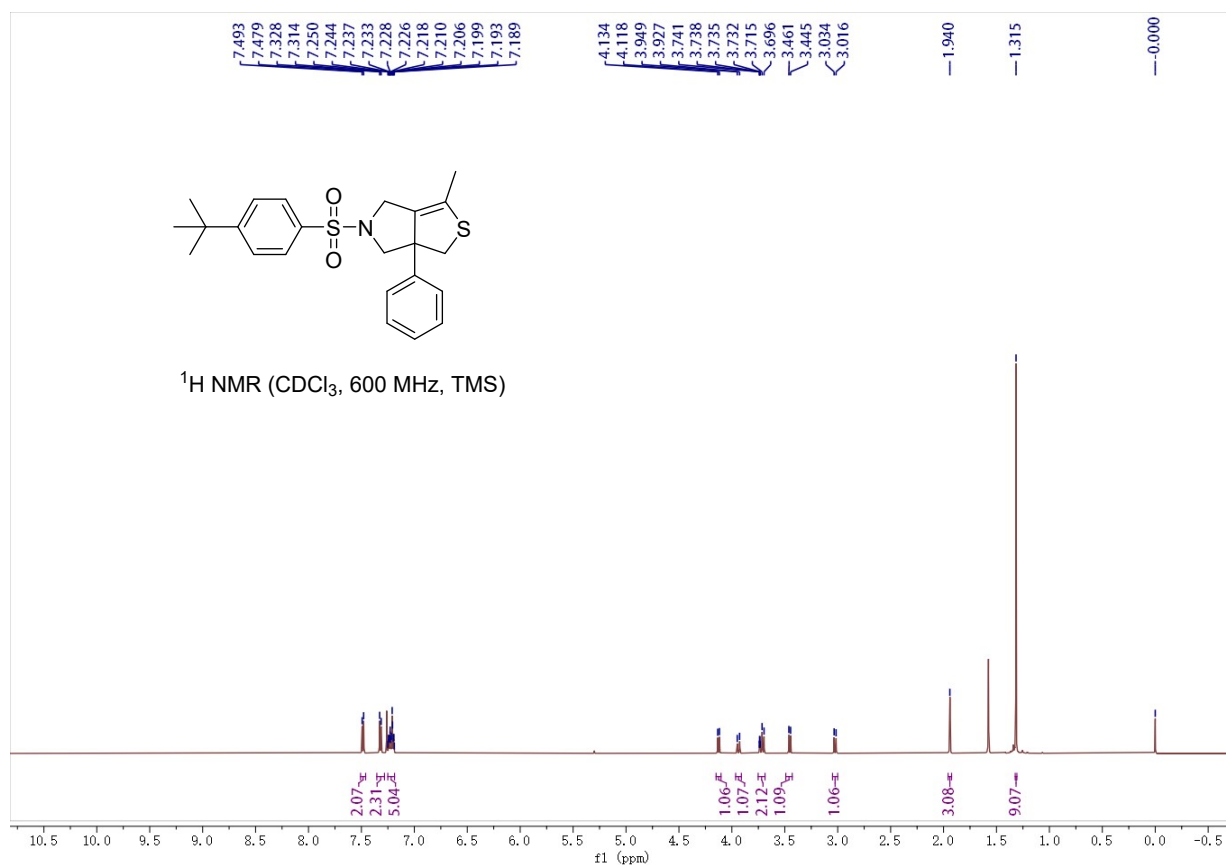

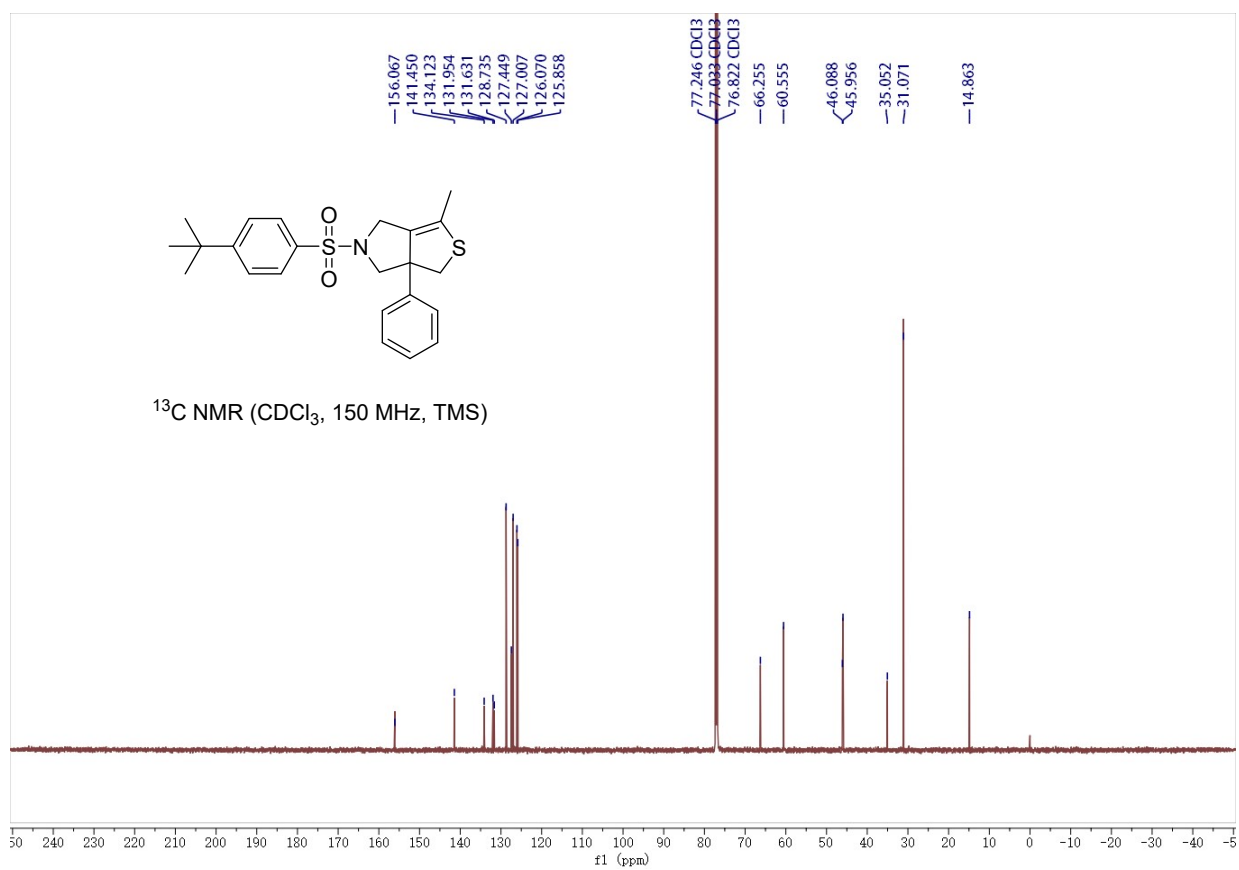

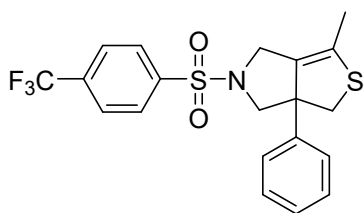

**3-methyl-6a-phenyl-5-((4-(trifluoromethyl)phenyl)sulfonyl)-4,5,6,6a-tetrahydro-1H-thieno[3,4-c]pyrrole (3w)**

A colorless oil, 34.0 mg, 80% yield.  $^1\text{H}$  NMR ( $\text{CDCl}_3$ , TMS, 600 MHz)  $\delta$  7.59 (d,  $J = 8.1$  Hz, 2H), 7.48 (d,  $J = 8.2$  Hz, 2H), 7.18 (dd,  $J = 7.2, 3.8$  Hz, 3H), 7.08 (d,  $J = 5.7$  Hz, 2H), 4.12 (d,  $J = 10.2$  Hz, 1H), 4.05 (d,  $J = 13.3$  Hz, 1H), 3.75 - 3.69 (m, 2H), 3.58 (d,  $J = 10.3$  Hz, 1H), 3.00 (d,  $J = 11.0$  Hz, 1H), 1.97 (s, 3H).  $^{13}\text{C}$  NMR ( $\text{CDCl}_3$ , TMS, 150 MHz)  $\delta$  141.1, 140.9, 133.9 (q,  $J = 33.0$  Hz), 132.7, 131.0, 128.8, 127.7, 127.2, 126.0, 125.9 (q,  $J = 3.0$  Hz), 123.2 (q,  $J = 271.5$  Hz), 66.4, 61.1, 46.1, 45.9, 14.9.  $^{19}\text{F}$  NMR ( $\text{CDCl}_3$ , TMS, 376 MHz)  $\delta$  -63.2 (s). IR (Acetone)  $\nu$  901, 1035, 1208, 1339, 3012  $\text{cm}^{-1}$ . HRMS (ESI) calcd. for  $\text{C}_{20}\text{H}_{19}\text{O}_2\text{NF}_3\text{S}_2$  (M+H): 426.0804, Found: 426.0800.

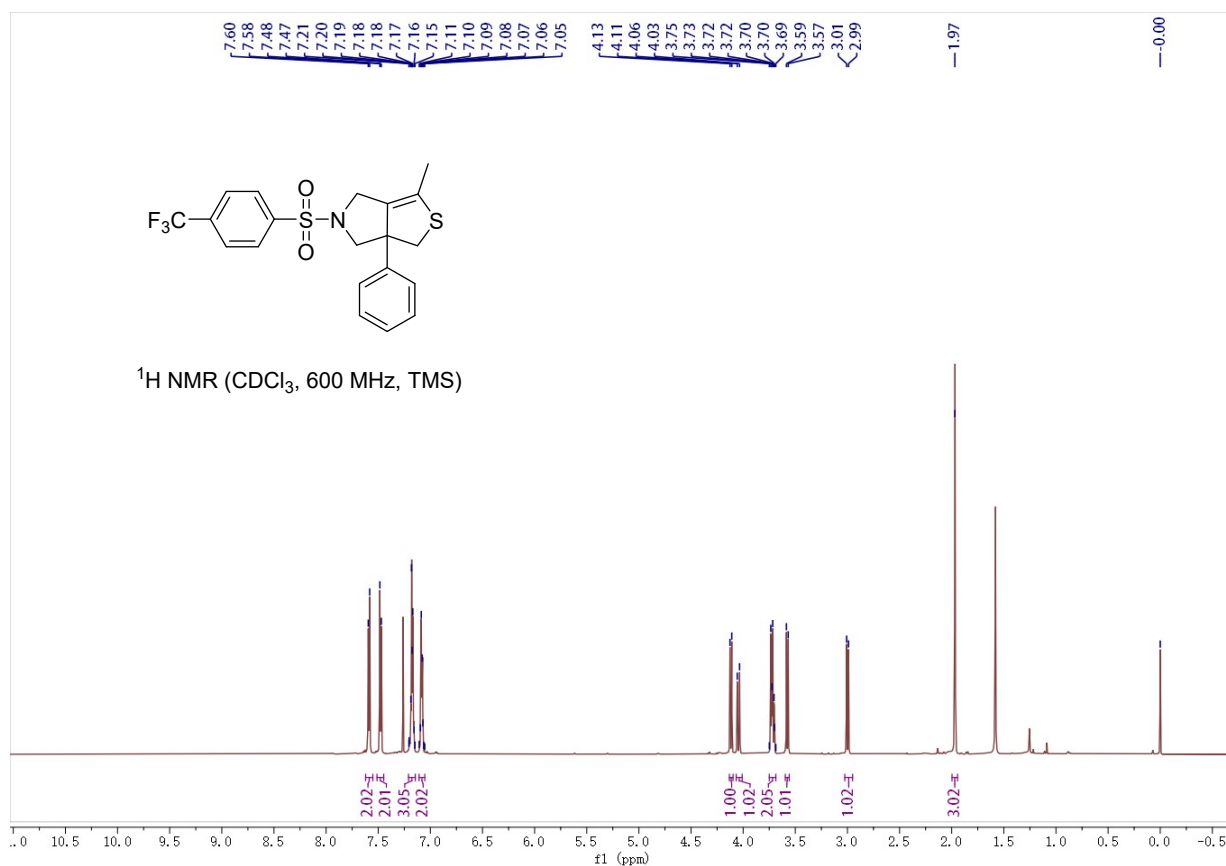

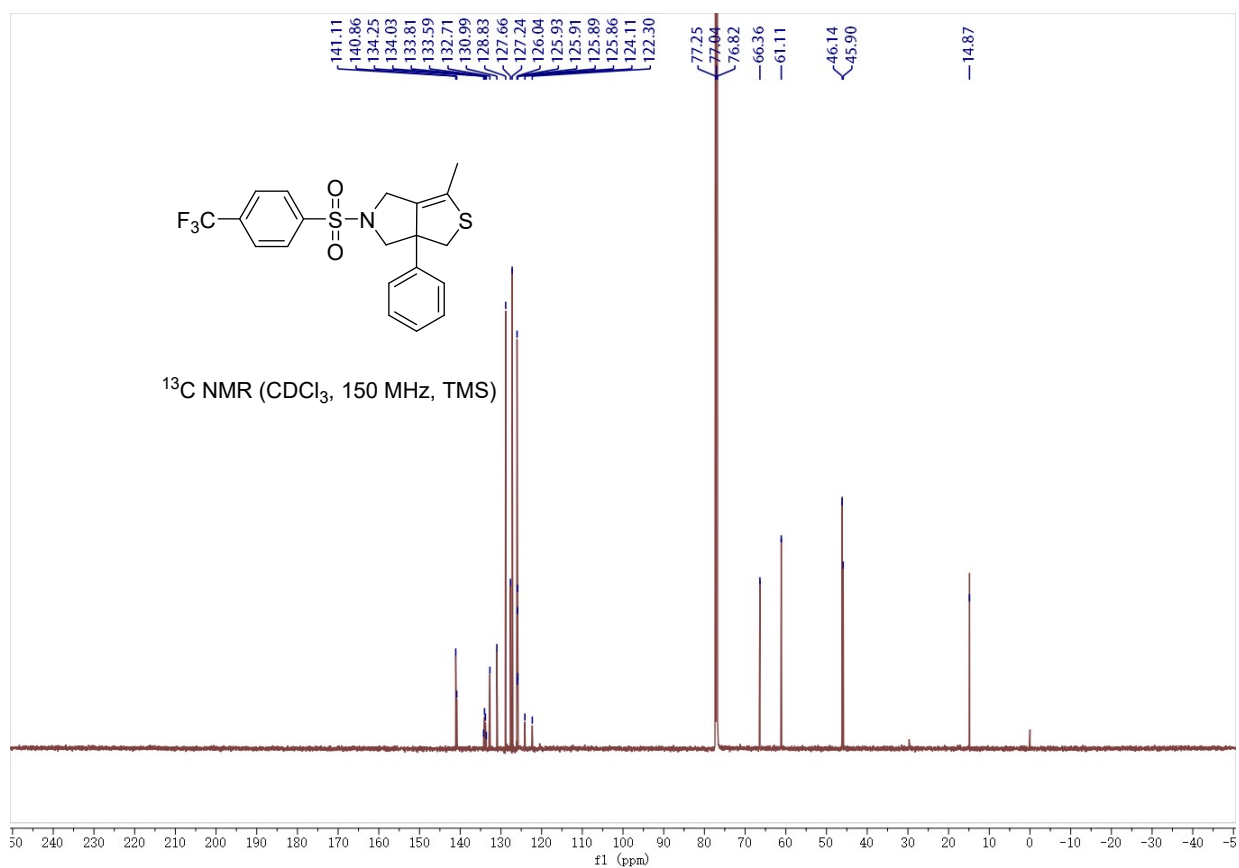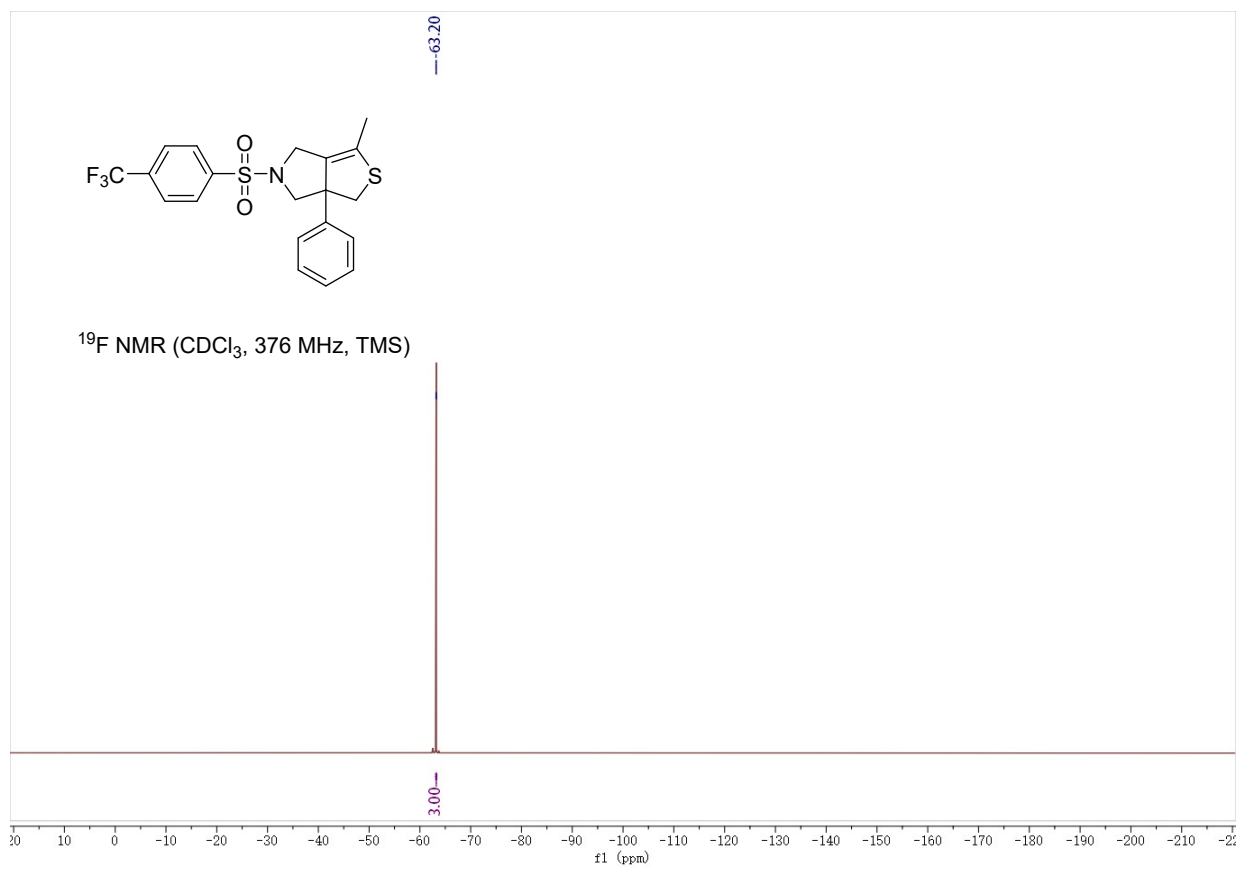

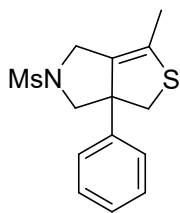

**3-methyl-5-(methylsulfonyl)-6a-phenyl-4,5,6,6a-tetrahydro-1H-thieno[3,4-c]pyrrole (3x)**

A colorless oil, 20.7 mg, 91% yield.  $^1\text{H}$  NMR ( $\text{CDCl}_3$ , TMS, 400 MHz)  $\delta$  7.43 – 7.36 (m, 4H), 7.35 – 7.28 (m, 1H), 4.09 (d,  $J = 10.3$  Hz, 1H), 4.04 (d,  $J = 13.7$  Hz, 1H), 3.84 – 3.71 (m, 2H), 3.58 (d,  $J = 10.3$  Hz, 1H), 3.08 (d,  $J = 11.0$  Hz, 1H), 2.30 (s, 3H).  $^{13}\text{C}$  NMR ( $\text{CDCl}_3$ , TMS, 150 MHz)  $\delta$  141.5, 132.4, 131.7, 129.1, 127.8, 126.3, 66.6, 60.6, 46.0, 45.6, 35.1, 14.8. IR (Acetone)  $\nu$  702, 906, 1055, 1148, 1331, 2920  $\text{cm}^{-1}$ . HRMS (ESI) calcd. for  $\text{C}_{14}\text{H}_{18}\text{O}_2\text{NS}_2$  (M+H): 296.0773, Found: 296.0761.

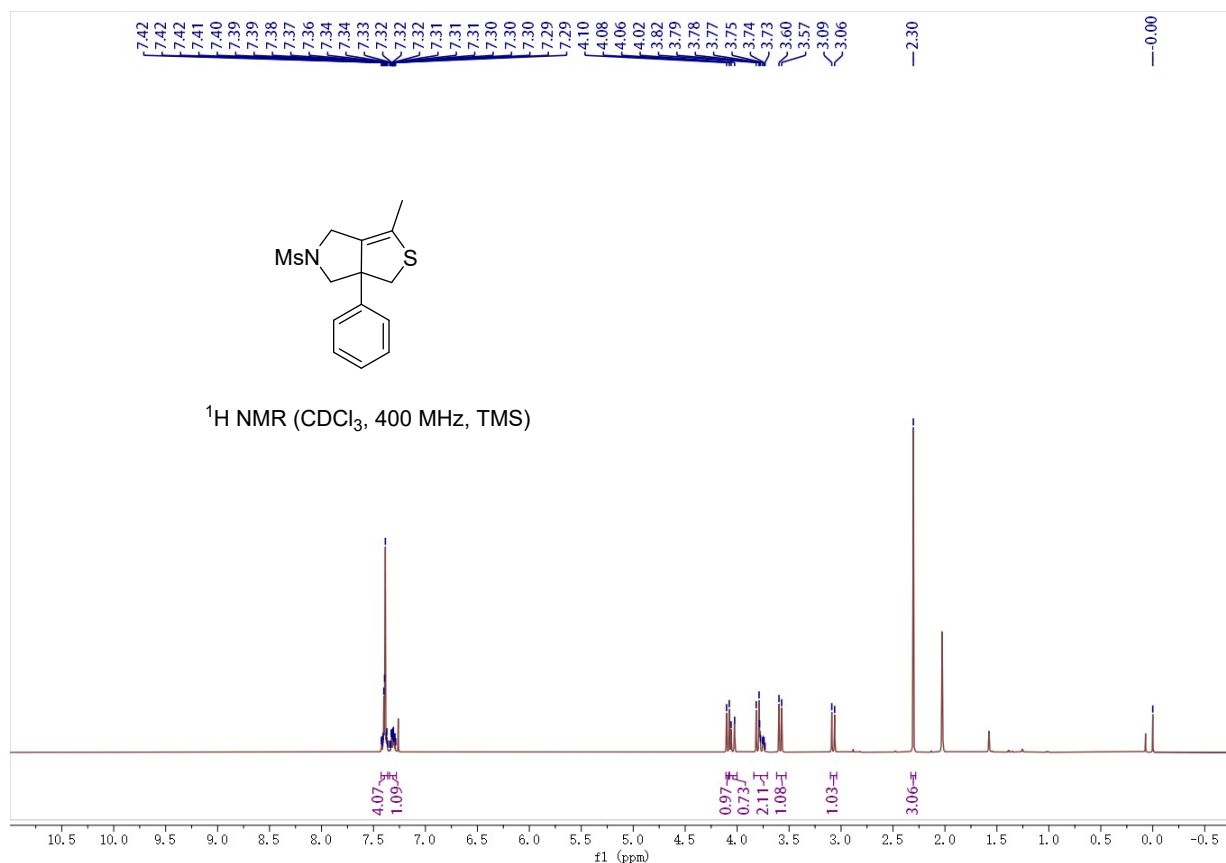

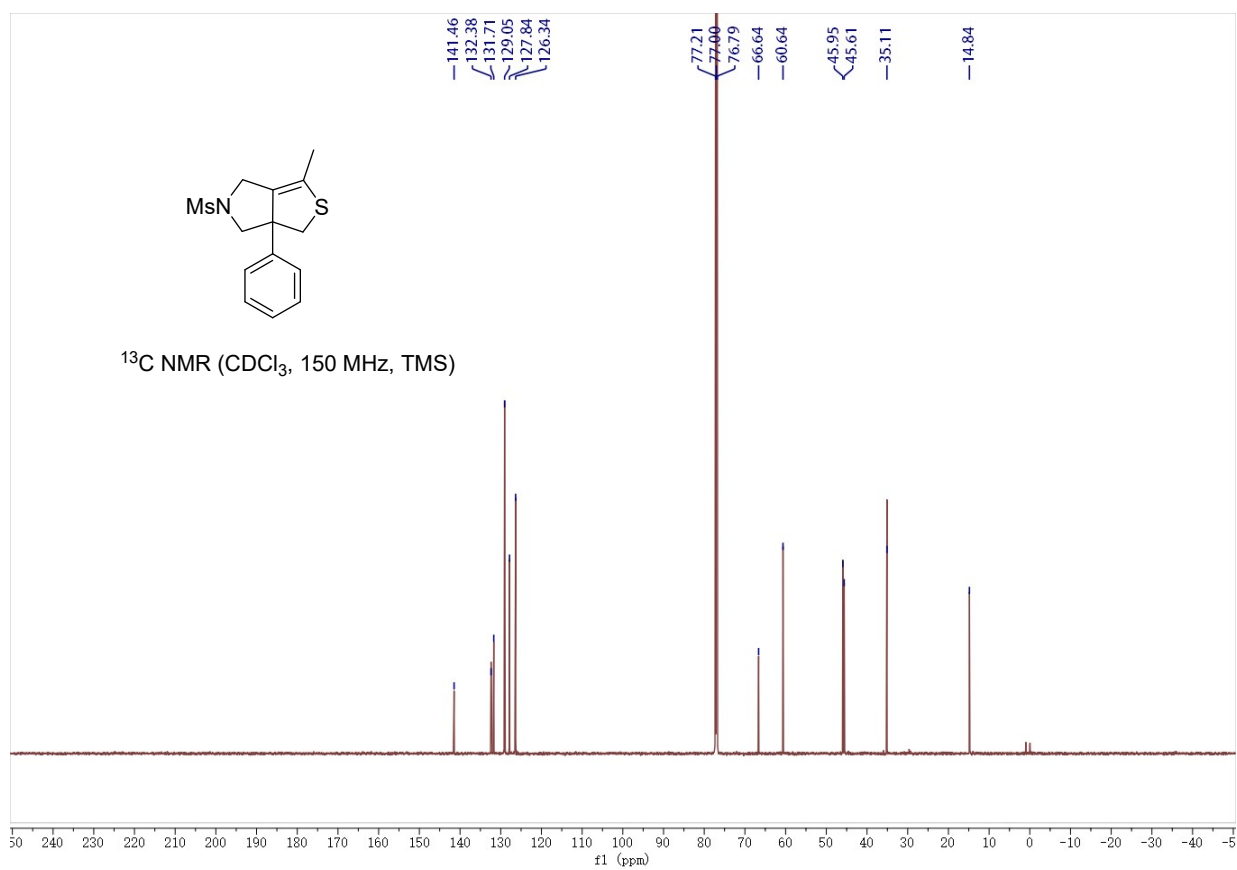



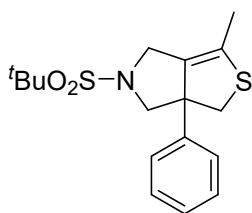

**5-(*tert*-butylsulfonyl)-3-methyl-6a-phenyl-4,5,6,6a-tetrahydro-1*H*-thieno[3,4-*c*]pyrrole (3y)**

A colorless oil, 30.4 mg, 90% yield.  $^1\text{H}$  NMR ( $\text{CDCl}_3$ , TMS, 400 MHz)  $\delta$  7.38 (d,  $J = 4.8$  Hz, 4H), 7.30 (ddd,  $J = 8.6, 5.1, 3.4$  Hz, 1H), 4.19 (d,  $J = 13.3$  Hz, 1H), 4.01 (d,  $J = 9.4$  Hz, 1H), 3.86 (d,  $J = 13.3$  Hz, 1H), 3.80 (d,  $J = 10.9$  Hz, 1H), 3.66 (d,  $J = 9.4$  Hz, 1H), 3.09 (d,  $J = 10.9$  Hz, 1H), 1.99 (s, 3H), 1.13 (s, 9H).  $^{13}\text{C}$  NMR ( $\text{CDCl}_3$ , TMS, 150 MHz)  $\delta$  150.1, 142.2, 141.7, 130.8, 128.8, 128.8, 127.6, 127.5, 126.2, 125.8, 104.1, 66.7, 62.1, 61.5, 61.5, 59.8, 58.4, 57.0, 54.2, 47.8, 45.3, 42.9, 24.5, 24.1, 14.8. IR (Acetone)  $\nu$  732, 1006, 1107, 1291, 3020  $\text{cm}^{-1}$ . HRMS (ESI) calcd. for  $\text{C}_{17}\text{H}_{23}\text{O}_2\text{NNaS}_2$  ( $\text{M}+\text{Na}$ ): 360.1062, Found: 360.1054.

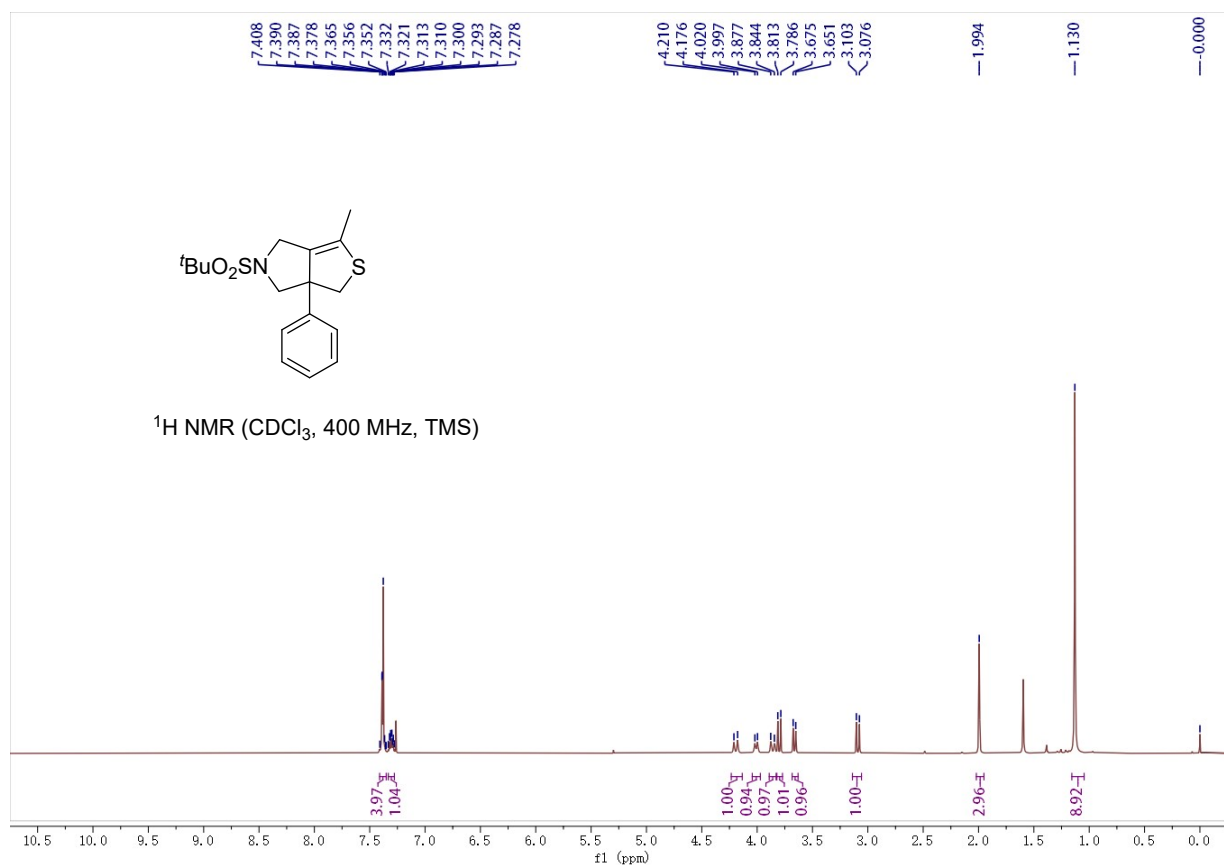

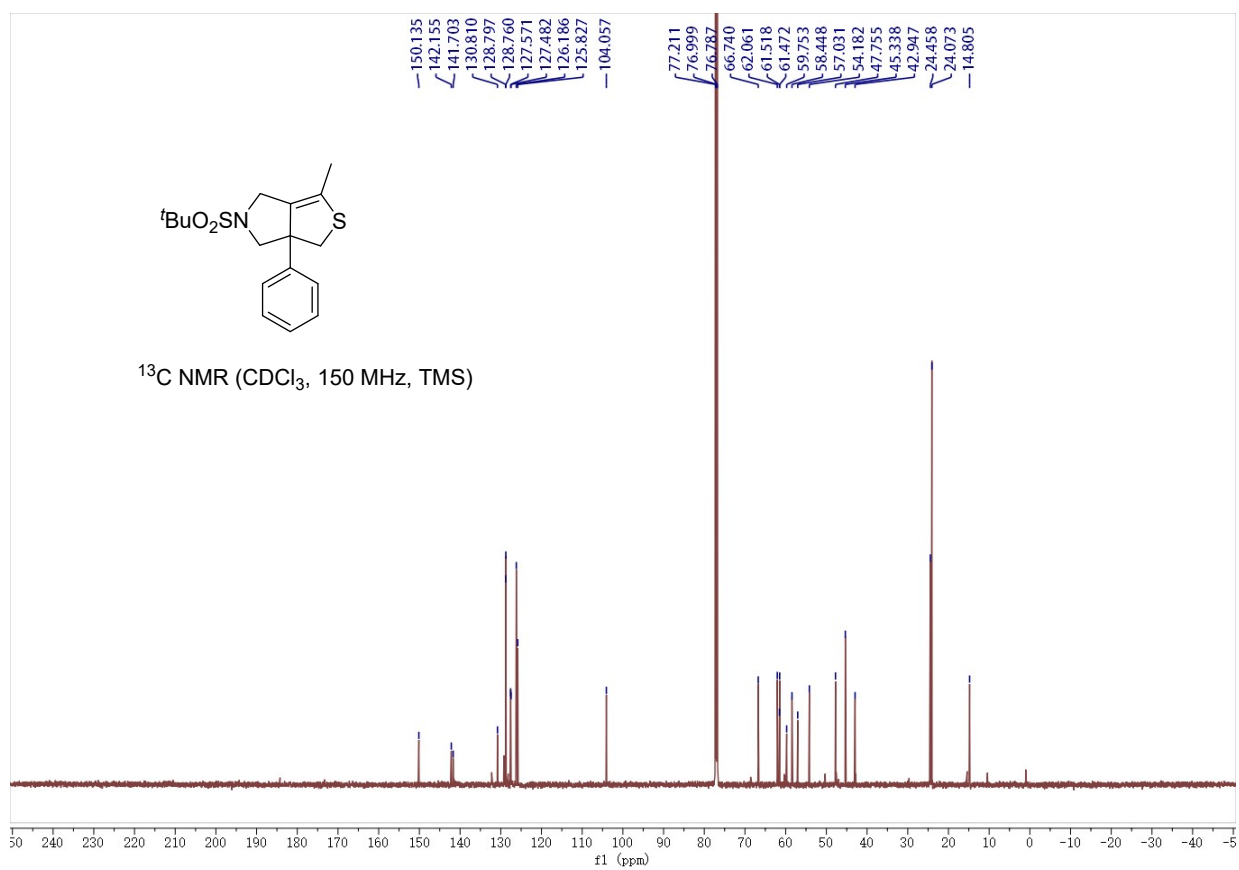

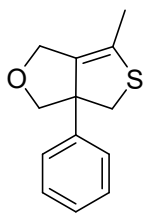

### 6-methyl-3a-phenyl-3a,4-dihydro-1H,3H-thieno[3,4-c]furan (**3z**)

A colorless oil, 18.8 mg, 43% yield.  $^1\text{H}$  NMR ( $\text{CDCl}_3$ , TMS, 400 MHz)  $\delta$  7.46 – 7.34 (m, 4H), 7.32 – 7.26 (m, 1H), 4.39 – 4.29 (m, 2H), 4.22 – 4.16 (m, 1H), 3.92 (d,  $J = 8.0$  Hz, 1H), 3.85 (d,  $J = 10.9$  Hz, 1H), 3.05 (d,  $J = 10.9$  Hz, 1H), 1.97 (s, 3H).  $^{13}\text{C}$  NMR ( $\text{CDCl}_3$ , TMS, 150 MHz)  $\delta$  142.4, 137.6, 128.9, 128.7, 127.2, 126.1, 78.8, 68.9, 64.7, 45.0, 15.0. IR (Acetone)  $\nu$  699, 723, 896, 1034, 1446, 2849  $\text{cm}^{-1}$ . HRMS (ESI) calcd. for  $\text{C}_{13}\text{H}_{15}\text{OS}$  (M-H): 219.0838, Found: 219.0834.

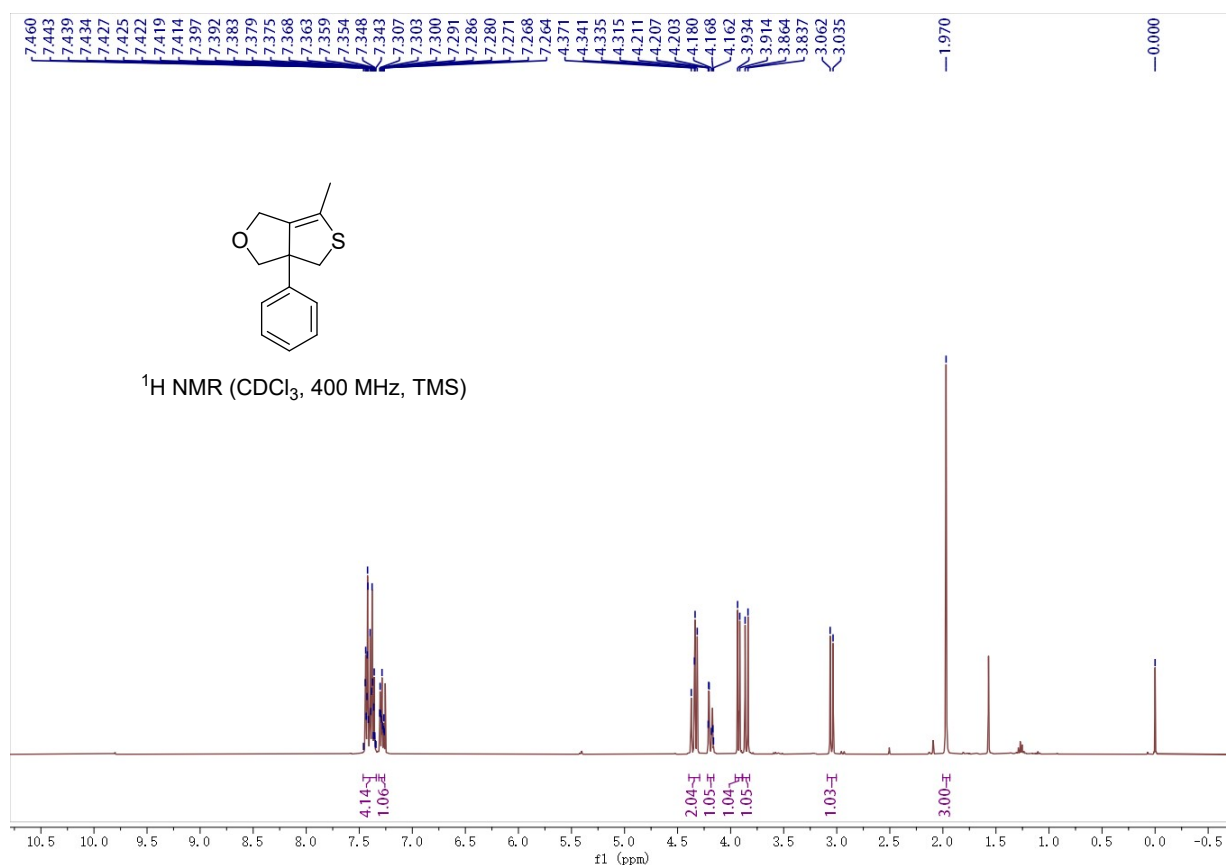

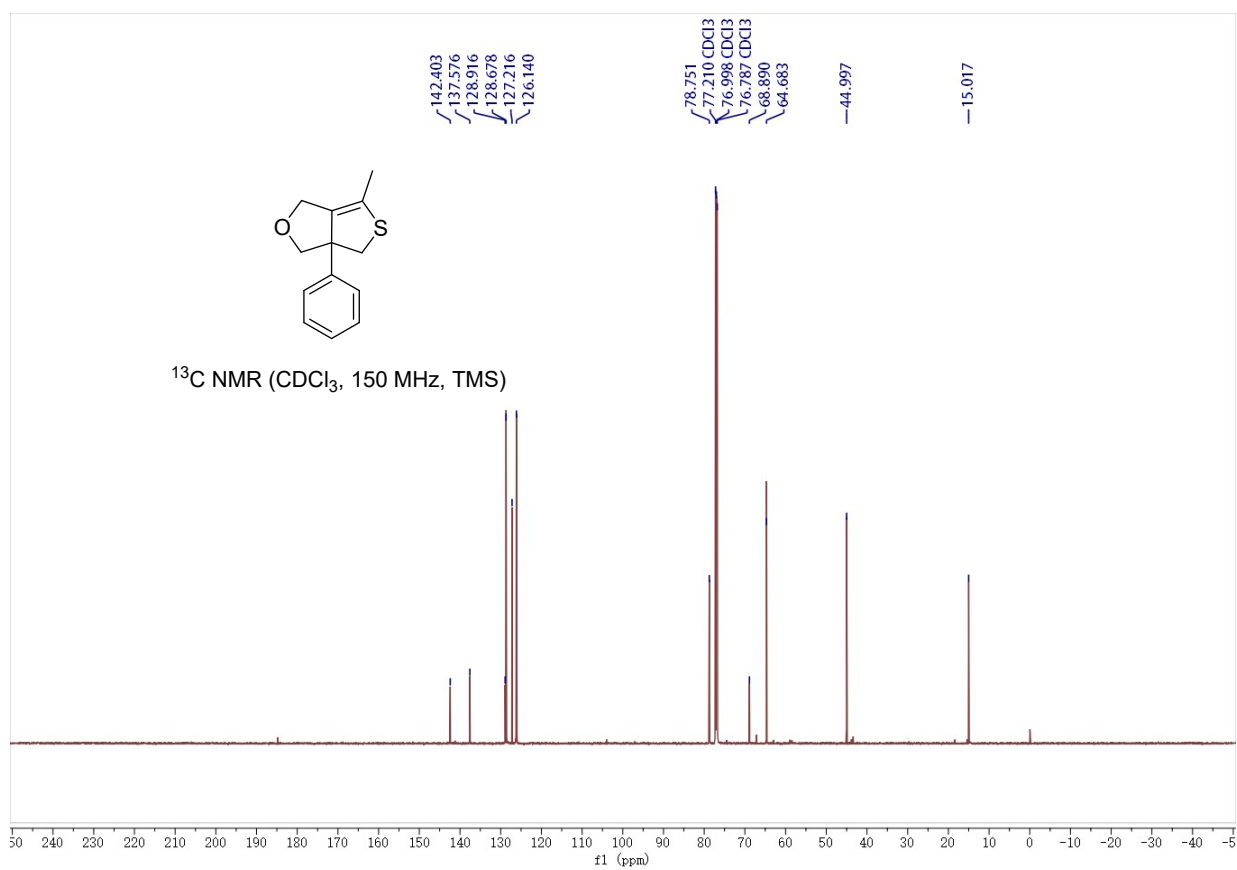

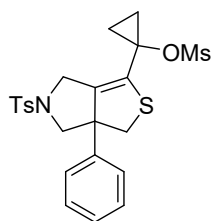

**1-(6a-phenyl-5-tosyl-4,5,6,6a-tetrahydro-1H-thieno[3,4-c]pyrrol-3-yl)cyclopropyl methanesulfonate (3ab)**

A colorless oil, 41.8 mg, 85% yield.  $^1\text{H}$  NMR ( $\text{CDCl}_3$ , TMS, 400 MHz)  $\delta$  7.45 (d,  $J = 8.2$  Hz, 2H), 7.21 – 7.15 (m, 3H), 7.15 – 7.06 (m, 4H), 4.20 (d,  $J = 14.6$  Hz, 1H), 4.01 (d,  $J = 9.6$  Hz, 1H), 3.85 (d,  $J = 14.6$  Hz, 1H), 3.55 (d,  $J = 11.1$  Hz, 1H), 3.26 (d,  $J = 9.6$  Hz, 1H), 3.03 (d,  $J = 11.1$  Hz, 1H), 2.86 (s, 3H), 2.32 (s, 3H), 1.70 – 1.59 (m, 1H), 1.42 – 1.31 (m, 2H), 1.22 – 1.14 (m, 3H), 0.95 – 0.84 (m, 1H).  $^{13}\text{C}$  NMR ( $\text{CDCl}_3$ , TMS, 100 MHz)  $\delta$  143.4, 140.5, 137.2, 133.5, 133.2, 129.6, 128.9, 127.6, 127.3, 125.8, 66.5, 60.02, 59.95, 46.8, 45.1, 39.6, 21.5, 14.9, 13.9. IR (Acetone)  $\nu$  661, 1083, 1203, 1349, 1753, 3033  $\text{cm}^{-1}$ . HRMS (ESI) calcd. for  $\text{C}_{23}\text{H}_{26}\text{O}_5\text{NS}_3$  (M+H): 492.0968, Found: 492.0955.

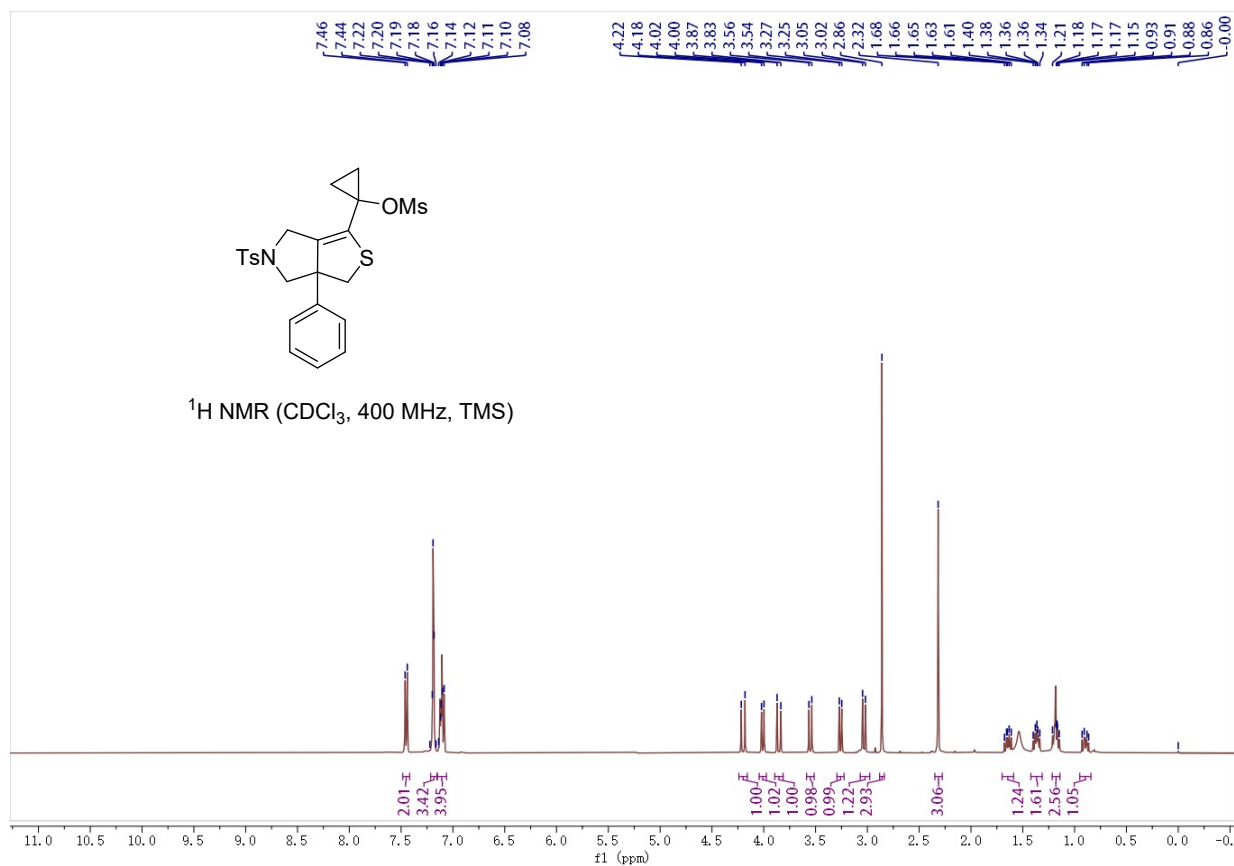

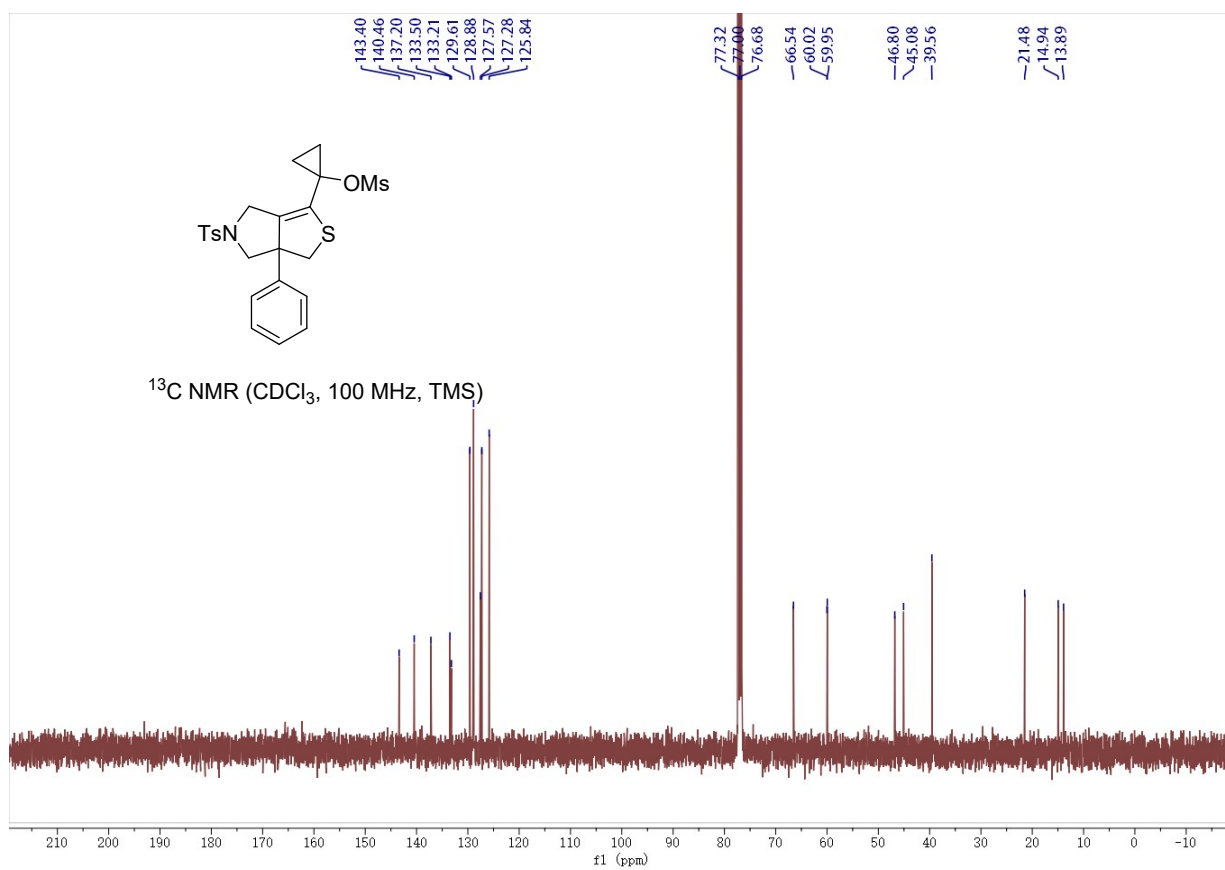

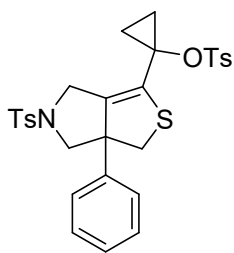

**1-(6a-phenyl-5-tosyl-4,5,6,6a-tetrahydro-1H-thieno[3,4-c]pyrrol-3-yl)cyclopropyl methylbenzenesulfonate (3ac)** 4-

A colorless oil, 48.2 mg, 90% yield.  $^1\text{H}$  NMR ( $\text{CDCl}_3$ , TMS, 400 MHz)  $\delta$  7.61 – 7.53 (m, 4H), 7.25 – 7.15 (m, 7H), 7.06 – 7.02 (m, 2H), 4.20 (d,  $J = 14.6$  Hz, 1H), 3.96 (d,  $J = 9.4$  Hz, 1H), 3.82 (d,  $J = 14.5$  Hz, 1H), 2.85 (d,  $J = 10.9$  Hz, 1H), 2.79 (d,  $J = 10.9$  Hz, 1H), 2.45 (s, 3H), 2.36 (s, 3H), 1.80 – 1.72 (m, 1H), 1.39 – 1.32 (m, 1H), 1.26 – 1.19 (m, 1H), 0.85 – 0.78 (m, 1H).  $^{13}\text{C}$  NMR ( $\text{CDCl}_3$ , TMS, 150 MHz)  $\delta$  144.8, 143.6, 140.3, 136.6, 134.7, 133.6, 129.7, 129.4, 128.8, 127.9, 127.5, 127.3, 125.7, 65.9, 60.2, 59.6, 46.8, 44.7, 21.7, 21.4, 14.9, 14.1, 13.8. IR (Acetone)  $\nu$  1043, 1253, 1369, 1755, 3021  $\text{cm}^{-1}$ . HRMS (ESI) calcd. for  $\text{C}_{29}\text{H}_{30}\text{O}_5\text{NS}_3$  (M+H): 568.1281, Found: 568.1269.

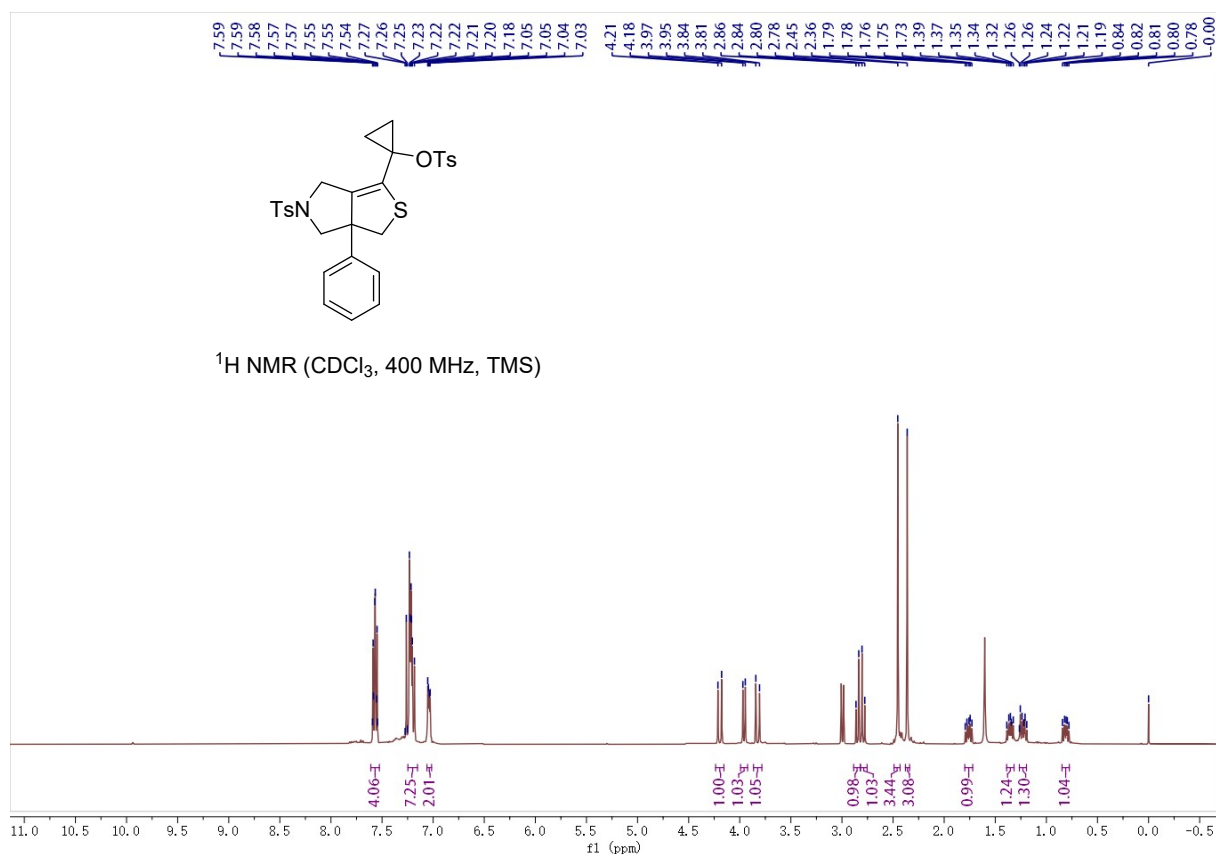

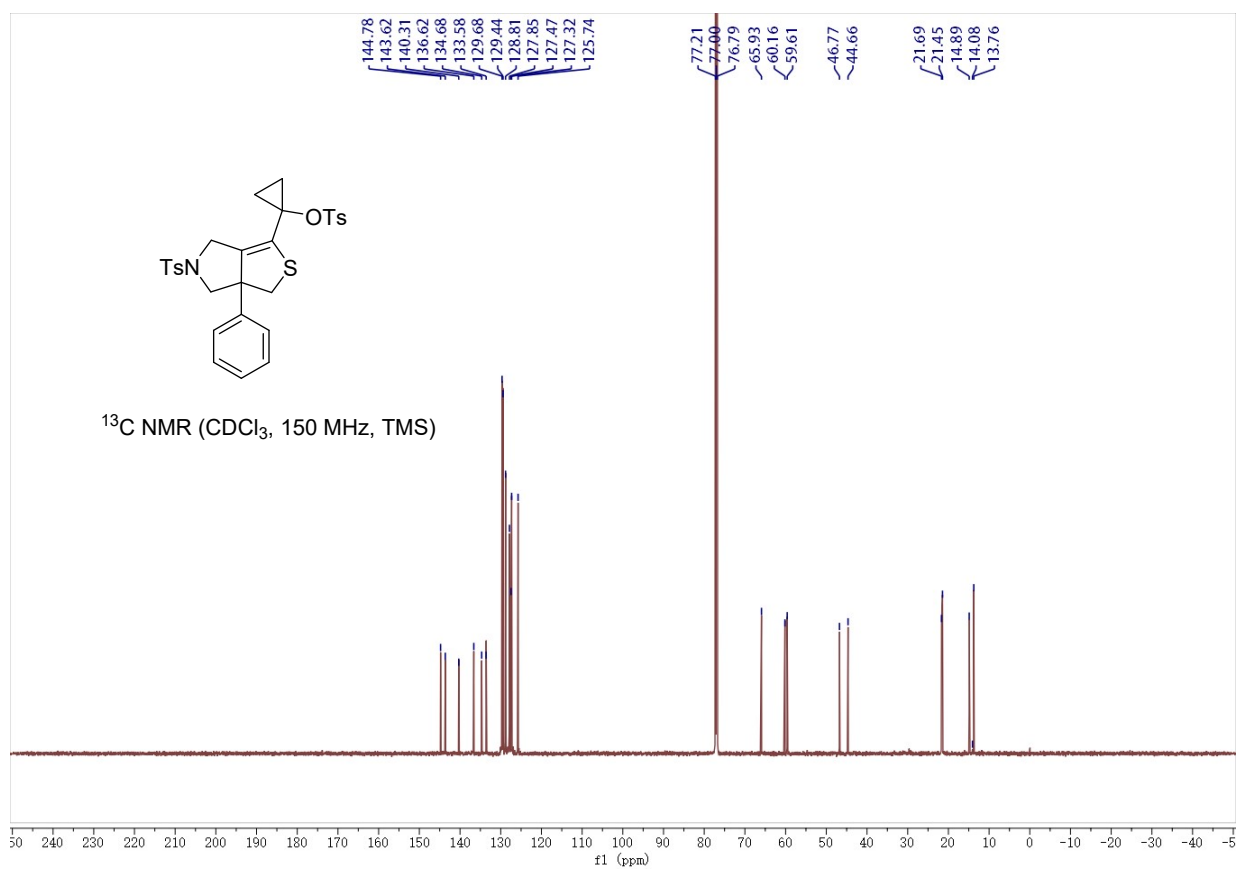



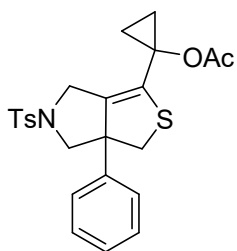

**1-(6a-phenyl-5-tosyl-4,5,6,6a-tetrahydro-1H-thieno[3,4-c]pyrrol-3-yl)cyclopropyl acetate (3ad)**

A colorless oil, 37.8 mg, 83% yield.  $^1\text{H}$  NMR ( $\text{CDCl}_3$ , TMS, 400 MHz)  $\delta$  7.47 (d,  $J = 8.3$  Hz, 2H), 7.27 – 7.23 (m, 3H), 7.19 – 7.10 (m, 4H), 4.21 (d,  $J = 14.1$  Hz, 1H), 4.05 (d,  $J = 9.6$  Hz, 1H), 3.78 (d,  $J = 14.1$  Hz, 1H), 3.59 (d,  $J = 10.9$  Hz, 1H), 3.35 (d,  $J = 9.6$  Hz, 1H), 2.96 (d,  $J = 10.8$  Hz, 1H), 2.38 (s, 3H), 2.06 (s, 3H), 1.26 – 1.00 (m, 4H).  $^{13}\text{C}$  NMR ( $\text{CDCl}_3$ , TMS, 150 MHz)  $\delta$  170.2, 143.3, 140.7, 134.9, 133.9, 133.1, 129.6, 128.8, 127.3, 127.2, 126.1, 67.1, 59.9, 55.6, 46.6, 45.1, 21.5, 20.9, 15.1, 13.7. IR (Acetone)  $\nu$  1055, 1269, 1380, 1650, 3021  $\text{cm}^{-1}$ . HRMS (ESI) calcd. for  $\text{C}_{24}\text{H}_{25}\text{O}_4\text{NNaS}_2$  ( $\text{M}+\text{Na}$ ): 478.1117, Found: 478.1108.

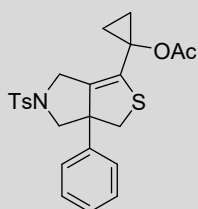

$^1\text{H}$  NMR ( $\text{CDCl}_3$ , 400 MHz, TMS)

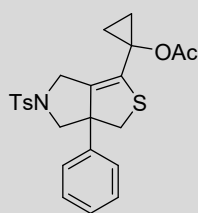

$^{13}\text{C}$  NMR ( $\text{CDCl}_3$ , 150 MHz, TMS)

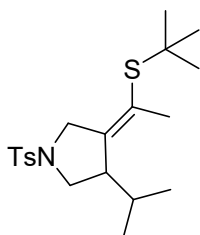

**(Z)-3-(1-(*tert*-butylthio)ethylidene)-4-isopropyl-1-tosylpyrrolidine (3ae)**

A colorless oil, 37.8 mg, 80% yield.  $^1\text{H}$  NMR ( $\text{CDCl}_3$ , TMS, 400 MHz)  $\delta$  7.67 (d,  $J = 8.2$  Hz, 2H), 7.32 (d,  $J = 8.0$  Hz, 2H), 3.90 (d,  $J = 15.9$  Hz, 1H), 3.48 (dd,  $J = 11.8, 3.7$  Hz, 1H), 3.36 (d,  $J = 15.8$  Hz, 1H), 2.68 (dd,  $J = 11.8, 4.4$  Hz, 1H), 2.42 (s, 3H), 2.20 – 2.08 (m, 2H), 1.98 (s, 3H), 1.32 (s, 9H), 1.07 (d,  $J = 6.6$  Hz, 3H), 0.94 (d,  $J = 6.7$  Hz, 3H).  $^{13}\text{C}$  NMR ( $\text{CDCl}_3$ , TMS, 150 MHz)  $\delta$  146.4, 143.5, 133.0, 129.6, 127.7, 122.1, 52.0, 48.2, 47.2, 43.3, 32.0, 29.3, 21.5, 21.3, 21.2, 18.4. IR (Acetone)  $\nu$  911, 1245, 1330, 1810, 2941  $\text{cm}^{-1}$ . HRMS (ESI) calcd. for  $\text{C}_{20}\text{H}_{32}\text{O}_2\text{NS}_2$  ( $\text{M}+\text{H}$ ): 382.1869, Found: 382.1872.

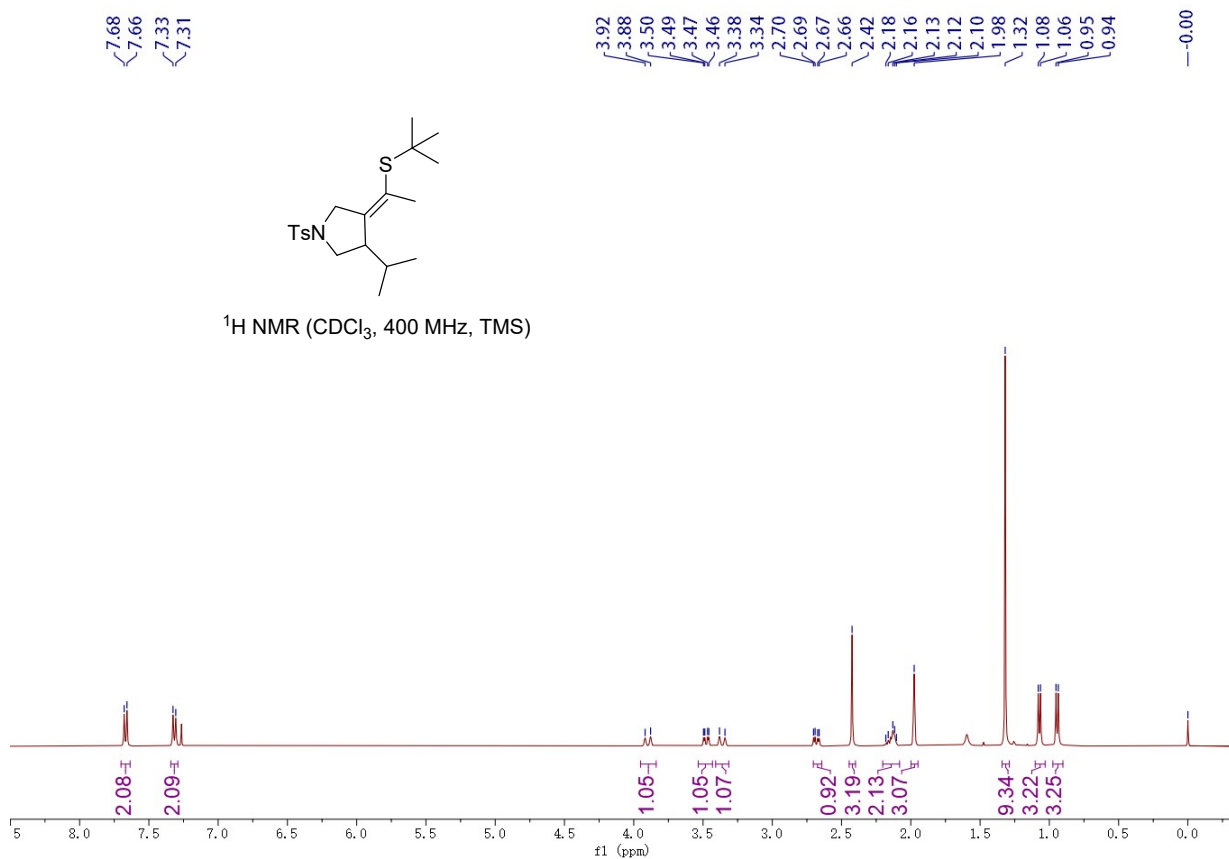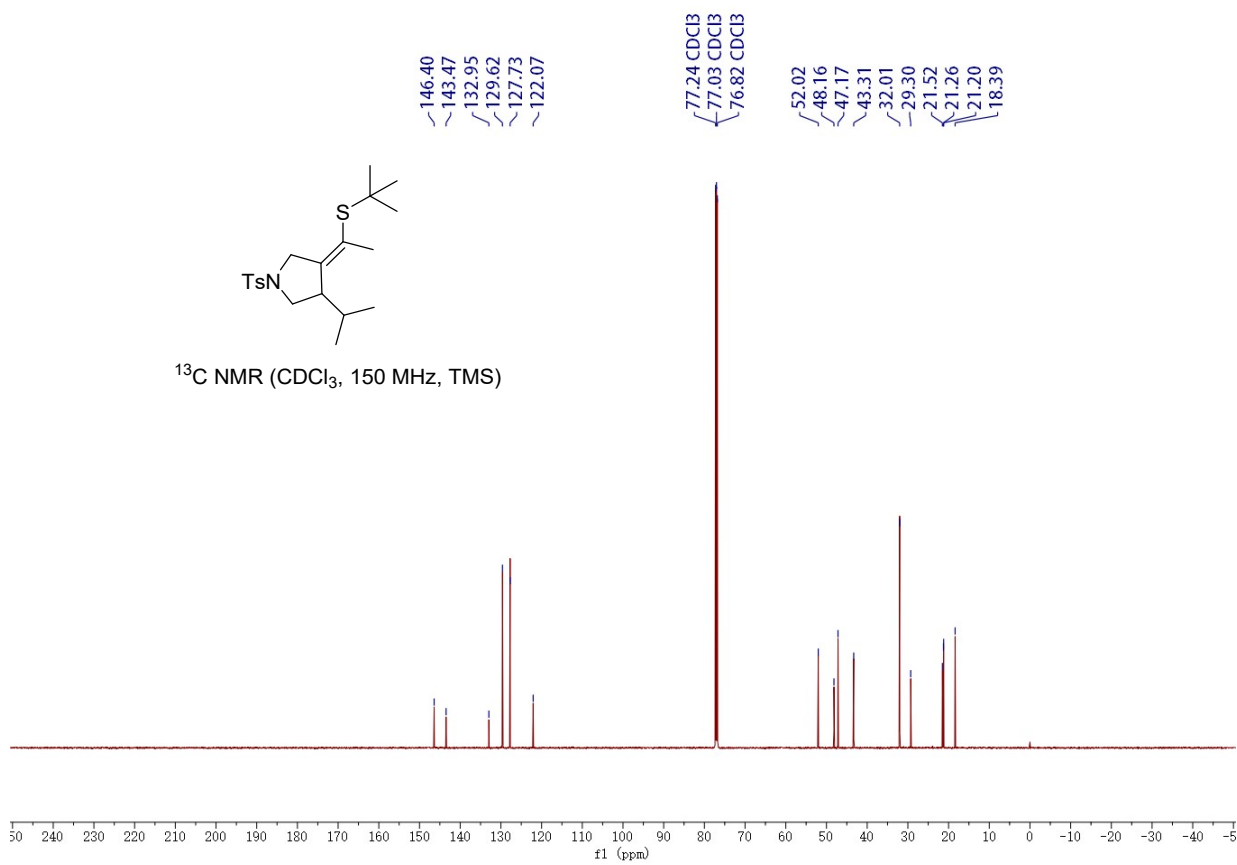

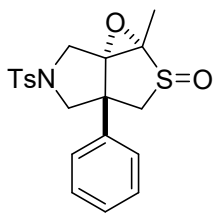

**1a-methyl-3a-phenyl-5-tosyltetrahydro-1aH,3H-oxireno[2',3':2,3]thieno[3,4-c]pyrrole 2-oxide (4)**

A colorless oil, 37.5 mg, 93% yield.  $^1\text{H}$  NMR ( $\text{CDCl}_3$ , TMS, 400 MHz)  $\delta$  7.49 (d,  $J = 8.4$  Hz, 2H), 7.29 – 7.24 (m, 3H), 7.20 – 7.11 (m, 4H), 4.40 (d,  $J = 9.8$  Hz, 1H), 4.07 (d,  $J = 13.2$  Hz, 1H), 3.99 (d,  $J = 15.0$  Hz, 1H), 3.50 (d,  $J = 13.1$  Hz, 1H), 3.36 (d,  $J = 12.8$  Hz, 1H), 3.14 (d,  $J = 9.8$  Hz, 1H), 2.40 (s, 3H), 2.07 (s, 3H).  $^{13}\text{C}$  NMR ( $\text{CDCl}_3$ , TMS, 150 MHz)  $\delta$  145.3, 144.1, 139.5, 134.9, 133.2, 129.9, 129.2, 128.1, 127.1, 126.0, 62.2, 60.3, 52.9, 45.8, 21.5, 7.9. IR (Acetone)  $\nu$  689, 1013, 1137, 1229, 1340, 1703, 3001  $\text{cm}^{-1}$ . HRMS (ESI) calcd. for  $\text{C}_{20}\text{H}_{22}\text{O}_4\text{NS}_2$  (M+H): 404.0985, Found: 404.0973.

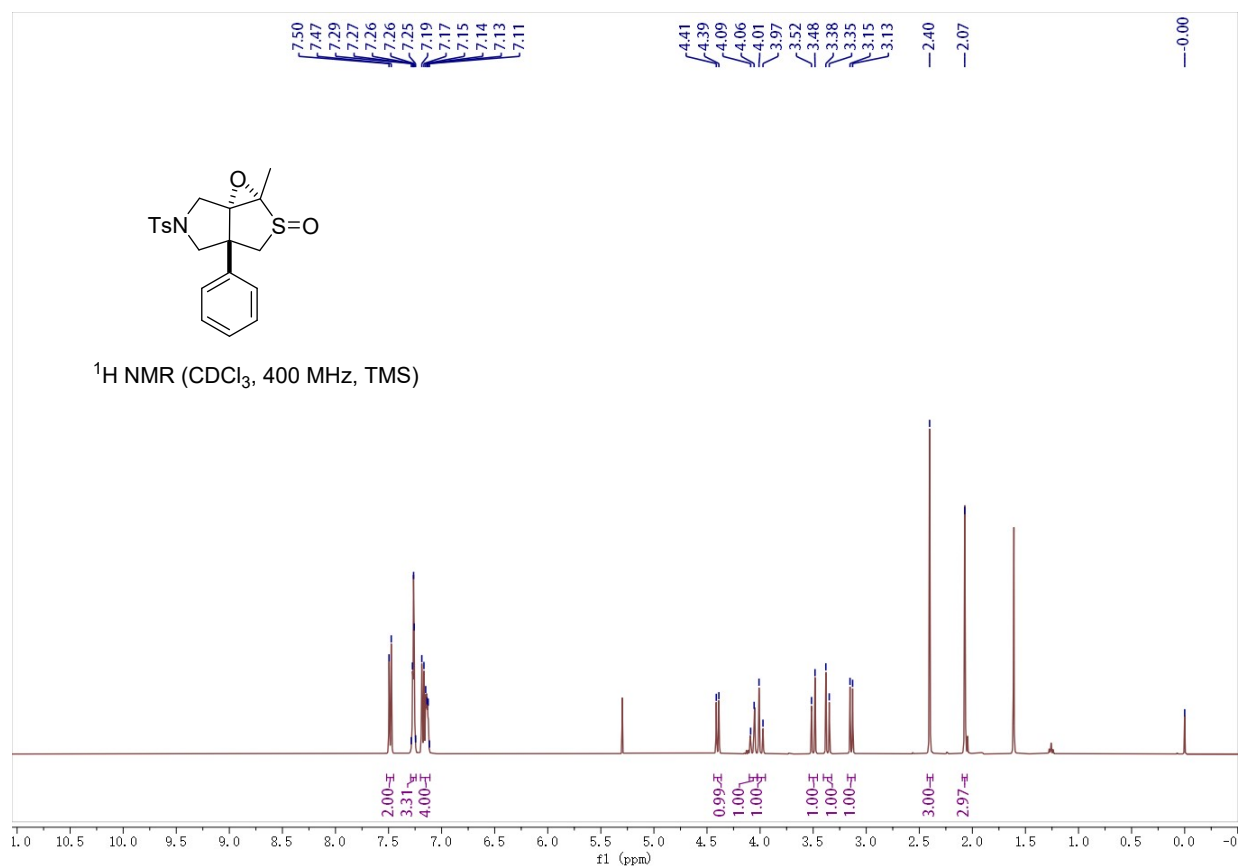

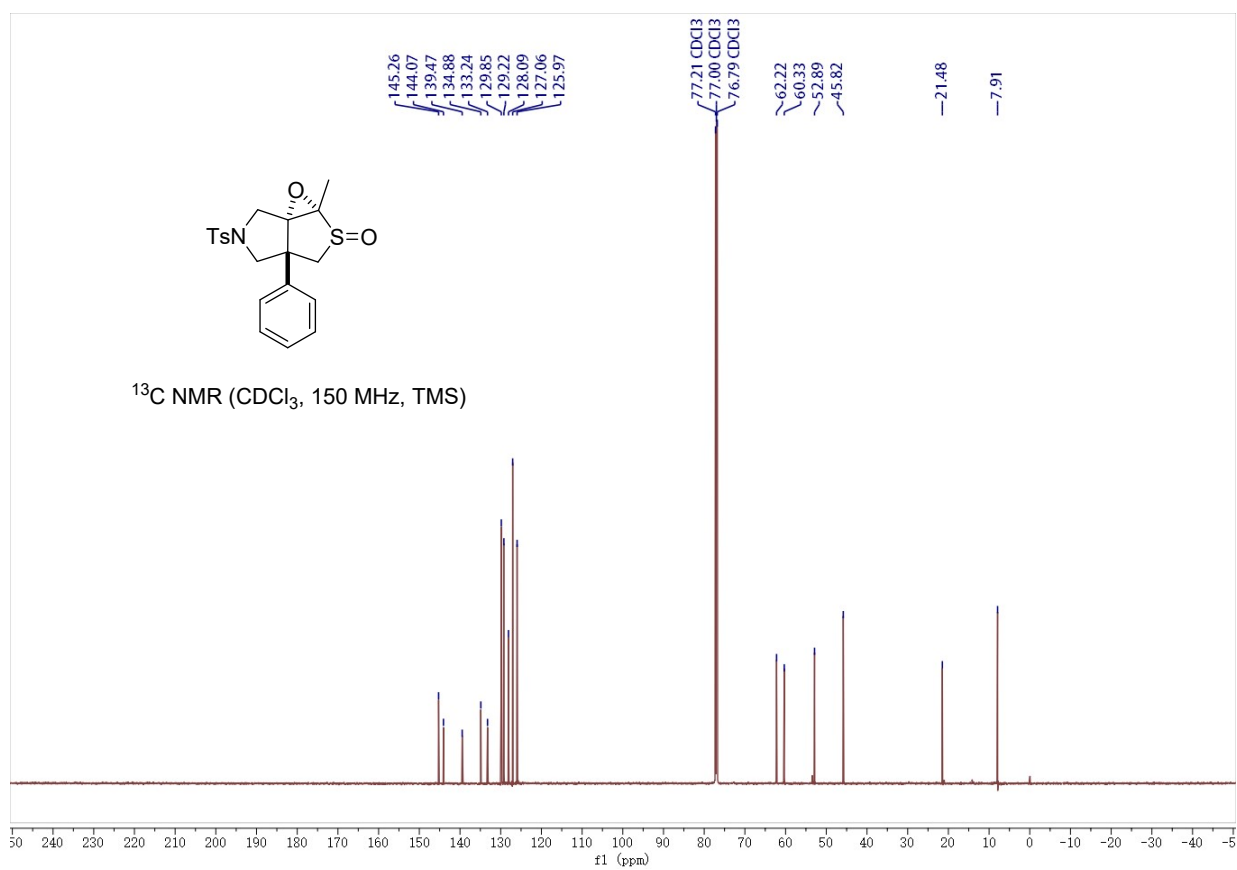

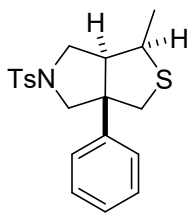

### 1-methyl-3a-phenyl-5-tosylhexahydro-1*H*-thieno[3,4-*c*]pyrrole (5)

A colorless oil, 26.1 mg, 70% yield.  $^1\text{H}$  NMR ( $\text{CDCl}_3$ , TMS, 400 MHz)  $\delta$  7.76 (d,  $J = 8.3$  Hz, 2H), 7.40 – 7.30 (m, 6H), 7.27 – 7.23 (m, 1H), 3.73 – 3.61 (m, 2H), 3.54 – 3.44 (m, 2H), 3.37 (t,  $J = 9.7$  Hz, 1H), 3.19 (d,  $J = 11.8$  Hz, 1H), 2.98 – 2.87 (m, 1H), 2.73 (d,  $J = 11.9$  Hz, 1H), 2.46 (s, 3H), 1.22 (d,  $J = 6.9$  Hz, 3H).  $^{13}\text{C}$  NMR ( $\text{CDCl}_3$ , TMS, 100 MHz)  $\delta$  143.8, 141.7, 133.3, 129.8, 128.8, 127.5, 127.3, 125.6, 61.4, 59.4, 57.4, 48.4, 43.4, 40.6, 21.6, 16.5. IR (Acetone)  $\nu$  711, 1127, 1249, 1309, 1613, 2981  $\text{cm}^{-1}$ . HRMS (ESI) calcd. for  $\text{C}_{20}\text{H}_{24}\text{O}_2\text{NS}_2$  ( $\text{M}+\text{H}$ ): 374.1243, Found: 374.1233.

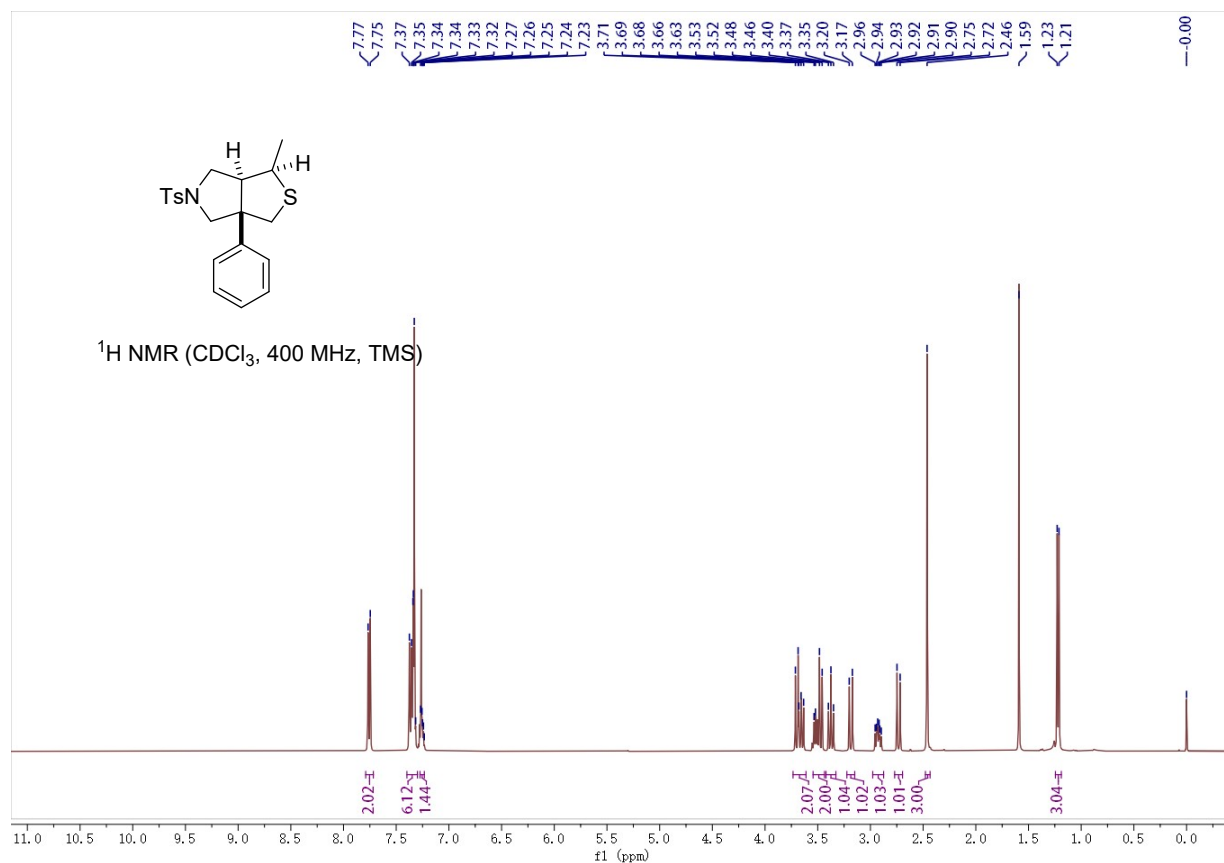

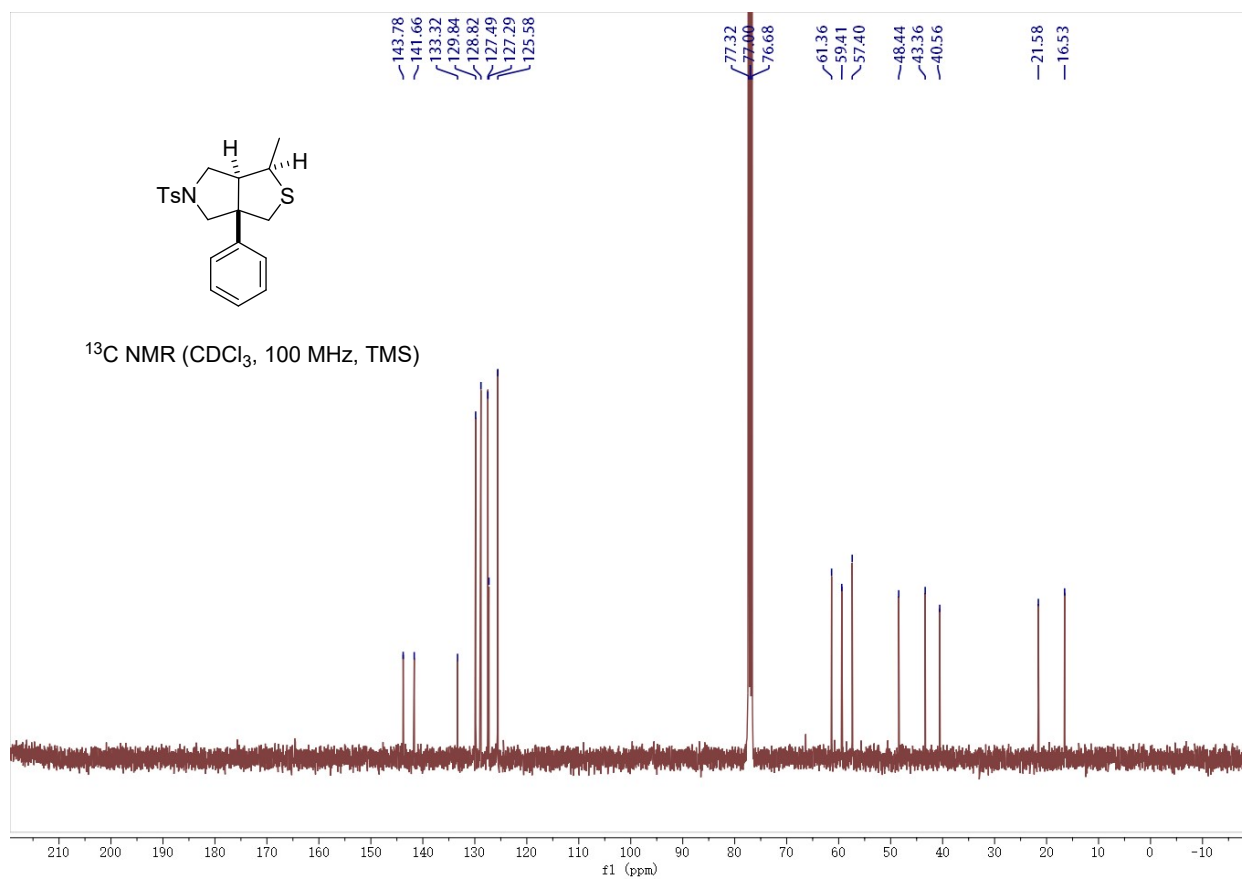

## 10. Computational studies

All quantum mechanical calculations have been performed with Gaussian 16. The geometries of all species have been optimized at B3LYP/6-31G(d) level. The subsequent frequency calculations on the stationary points were carried out at the same level of theory to ascertain the nature of the stationary points as minima on the respective potential energy surfaces. The conformational space of flexible systems has first been searched manually and checked by xtb 6.0 program. Thermochemical corrections to 298.15 K have been calculated for all minima from unscaled vibrational frequencies obtained at this same level. The thermochemical corrections have been combined with single-point energies calculated at the SMD/B3LYP/6-311+G(d,p)// B3LYP/6-31G(d) level to yield free energy  $G_{298}$  at 298.15 K. The solvent effect was estimated by the IEFPCM method with radii and nonelectrostatic terms for SMD solvation model in DiChloroEthane: ( $\epsilon = 10.13$ ).

**Table S6.** The total energies, enthalpies and free energies of all species in dichloromethane shown in Schemes 3E.

|              | $E_{\text{tot}}$ | $H_{298}$    | $G_{298}$    |
|--------------|------------------|--------------|--------------|
| <b>INT1</b>  | -556.085219      | -555.955359  | -555.993458  |
| <b>TS1'</b>  | -1742.616143     | -1742.152088 | -1742.24626  |
| <b>INT2'</b> | -1742.630428     | -1742.165063 | -1742.257893 |
| <b>TS2'</b>  | -1742.618378     | -1742.154848 | -1742.244952 |
| <b>INT3'</b> | -1742.658304     | -1742.193524 | -1742.284091 |
| <b>TS3'</b>  | -1742.64096      | -1742.175945 | -1742.264673 |
| <b>INT4</b>  | -1742.675333     | -1742.209911 | -1742.310505 |
| <b>1k</b>    | -1186.544676     | -1186.211191 | -1186.286879 |
| <b>TS1</b>   | -1742.625787     | -1742.161629 | -1742.258778 |
| <b>INT2</b>  | -1742.634759     | -1742.170373 | -1742.266615 |
| <b>TS2</b>   | -1742.617553     | -1742.153582 | -1742.245509 |
| <b>INT3</b>  | -1742.654178     | -1742.188446 | -1742.27581  |
| <b>TS3</b>   | -1742.643258     | -1742.178092 | -1742.265442 |



## Archive entries

### INT1

Opt @ B3LYP/6-311+G(d,p) in dichloroethane (SMD model)  
SCF Done: E(RB3LYP) = -556.085219a.u.  
Zero-point correction = 0.122166Hartree/Particle  
Sum of electronic and thermal Free Energies = -555.993458a.u.

---

C 0.31161200,0.00008400,0.00679400  
C 0.86075600,1.26951800,0.67817600  
C 0.86050700,-1.26196600,0.69226700  
S -1.53721100,0.00049000,0.07263200  
C 0.67143200,-0.00842500,-1.49480800  
H 0.47914900,2.17113600,0.18999800  
H 1.95754400,1.27960800,0.61934900  
H 0.58183200,1.31143900,1.73652100  
H 0.47855100,-2.16886500,0.21426700  
H 1.95728300,-1.27295500,0.63338200  
H 0.58175800,-1.29190200,1.75106500  
H 0.28423100,0.87802300,-2.00752900  
H 1.76482900,-0.00890900,-1.59627900  
H 0.28435300,-0.90068400,-1.99745400

### TS1'

Opt @ B3LYP/6-311+G(d,p) in dichloroethane (SMD model)  
SCF Done: E(RB3LYP) = -1742.616143a.u.  
Zero-point correction = 0.434510Hartree/Particle  
Sum of electronic and thermal Free Energies = -1742.24626a.u.

---

C -4.21035200,1.82940900,0.25249700  
C -3.02718300,2.58309700,-0.37186000  
C -5.29186700,1.56777400,-0.80546600  
S -3.63815000,0.23247100,1.03752300  
C -4.79986000,2.64935700,1.41673500  
H -2.24408300,2.77241300,0.36932900  
H -3.36309300,3.54988900,-0.77170500  
H -2.59148200,2.01433500,-1.19987500  
H -6.14021900,1.02343000,-0.37847300  
H -5.66389500,2.51995500,-1.20802300  
H -4.89312500,0.98731000,-1.64418600  
H -4.04944400,2.84287000,2.19029500  
H -5.15568300,3.61732000,1.03803600

H -5.64723800,2.13389900,1.88032700  
C -0.54962700,-0.34885400,-1.15810400  
C -1.90086200,-0.89954800,-1.06603500  
C -3.07596400,-1.17106500,-0.76411600  
C -4.26690700,-2.02604100,-0.96832500  
C 0.32843300,-1.19355600,1.01364600  
C 0.74811100,-2.46763800,1.71516200  
C 0.21434500,-3.76136400,1.16037300  
C 1.48187000,-2.39941700,2.83012800  
N 0.43249400,-1.21180300,-0.46607700  
C 2.84744900,0.22837600,-0.56263900  
C 3.57950100,0.16839400,0.62587500  
C 4.22409000,1.31603100,1.08434400  
C 4.15082700,2.52378800,0.37604800  
C 3.41950200,2.55192400,-0.82043000  
C 2.76724100,1.41593500,-1.29459000  
C 4.83108400,3.76779300,0.89541800  
S 1.99120400,-1.23687700,-1.15139800  
O 2.67550500,-2.39853900,-0.58671500  
O 1.79627300,-1.08739500,-2.59799700  
H -0.54368600,0.67542300,-0.74561600  
H -0.24891600,-0.28496300,-2.20745500  
H -4.52324200,-2.55056400,-0.04271000  
H -5.13687300,-1.42757600,-1.25345500  
H -4.06740800,-2.76349700,-1.75366100  
H 0.85924200,-0.32746300,1.43581000  
H -0.73877500,-1.03110500,1.20868100  
H 0.64104000,-3.95806500,0.17182100  
H 0.45742500,-4.60161800,1.81752800  
H -0.87641000,-3.71802500,1.03973000  
H 1.72944000,-3.28850000,3.40371100  
H 1.85599400,-1.45348200,3.21521900  
H 3.65596200,-0.77012200,1.16495100  
H 4.80244500,1.26962800,2.00387200  
H 3.36983000,3.47343300,-1.39539100  
H 2.22954900,1.43608500,-2.23671300  
H 5.71826500,3.52198300,1.48777600  
H 5.13880500,4.42771600,0.07784000  
H 4.15604500,4.34351200,1.54258400

## INT2'

Opt @ B3LYP/6-311+G(d,p) in dichloroethane (SMD model)

SCF Done: E(RB3LYP) = -1742.630428a.u.

Zero-point correction = 0.436148Hartree/Particle

Sum of electronic and thermal Free Energies = -1742.257893a.u.

-----

C -4.32801800,1.55000100,0.00541500  
C -3.38221200,1.98025700,-1.12129900  
C -5.59589700,0.90913800,-0.57229400  
S -3.45479700,0.37721600,1.19781300  
C -4.69241500,2.75276100,0.89111800  
H -2.48369600,2.46324100,-0.72389300  
H -3.89068100,2.69522900,-1.78186900  
H -3.07681600,1.12429900,-1.73156700  
H -6.26782300,0.56739300,0.22118200  
H -6.13508100,1.64381700,-1.18525300  
H -5.35560700,0.05753000,-1.21668500  
H -3.80057100,3.21153200,1.33155700  
H -5.19889600,3.51305400,0.28341200  
H -5.36771700,2.46260900,1.70292700  
C -0.69388200,-0.44430800,-0.69291800  
C -1.92630100,-1.20487900,-0.40796100  
C -3.08017500,-1.12822700,0.22228200  
C -4.08463300,-2.25539700,0.29510600  
C 0.74172100,-1.62325600,0.96574400  
C 1.47384700,-2.92485000,1.21413500  
C 1.01203500,-4.12755300,0.43530000  
C 2.41670800,-2.98508200,2.15946700  
N 0.51223400,-1.27263200,-0.45573700  
C 2.62805700,0.57334600,-0.60881100  
C 3.60947600,0.38576500,0.36771700  
C 4.17521700,1.50024500,0.98480400  
C 3.77777500,2.80069300,0.64362000  
C 2.79970100,2.96016100,-0.34886100  
C 2.22157200,1.85876900,-0.97621300  
C 4.37760200,4.00028900,1.33744100  
S 1.87061800,-0.85603900,-1.39132700  
O 2.81515700,-1.96629100,-1.27604100  
O 1.34822500,-0.42507200,-2.69259300  
H -0.67750900,0.47419600,-0.07683900  
H -0.67613300,-0.14670300,-1.74421500  
H -4.24856600,-2.54695700,1.33943200  
H -5.05635200,-1.95273700,-0.10941500  
H -3.72762900,-3.12684800,-0.26258800  
H 1.22674400,-0.79724100,1.50722700  
H -0.26914700,-1.72173600,1.38071700  
H 1.24036300,-4.00377100,-0.62780200  
H 1.49990300,-5.03938700,0.79249000  
H -0.07536700,-4.25864700,0.51903600

H 2.90239200,-3.92159800,2.41990500  
H 2.73579100,-2.10307000,2.71023500  
H 3.93513200,-0.61851100,0.61805200  
H 4.94636600,1.35705700,1.73785800  
H 2.49452900,3.96152900,-0.64287100  
H 1.48799200,1.98941700,-1.76477300  
H 5.39980300,3.79933900,1.67386800  
H 4.40096900,4.87450800,0.67873700  
H 3.79069600,4.27570600,2.22382700

## TS2'

Opt @ B3LYP/6-311+G(d,p) in dichloroethane (SMD model)

SCF Done: E(RB3LYP) = -1742.618378a.u.

Zero-point correction = 0.435046Hartree/Particle

Sum of electronic and thermal Free Energies = -1742.244952a.u.

-----  
C 4.30962600,-1.58807900,0.48784400  
C 5.27343700,-2.52077000,-0.26382700  
C 2.95648100,-2.27556500,0.70434600  
S 4.12667000,-0.11742700,-0.68177600  
C 4.91871800,-1.17076700,1.83240000  
C 0.88095700,0.24868200,-1.08734000  
C 1.73603200,1.06677100,-0.19100100  
C 3.01293000,1.06853900,0.15576500  
C 3.66869400,2.08178100,1.06391800  
C -0.80129500,1.89847700,-0.51384300  
C 0.08007400,2.46479600,0.59668900  
C 0.61789900,3.85688800,0.33645200  
C -0.05074500,1.98473100,1.87239300  
N -0.52959300,0.46269500,-0.67291500  
C -3.03698600,-0.53118300,-0.47674700  
C -4.22195700,0.15580800,-0.73125500  
C -5.29505900,0.00766200,0.14969800  
C -5.20013700,-0.82011900,1.27400400  
C -3.99451100,-1.50596500,1.50103600  
C -2.91573100,-1.37154000,0.63447400  
C -6.36683100,-0.99306600,2.21689900  
S -1.66477100,-0.38364000,-1.62126900  
O -2.11752900,0.43117100,-2.75939900  
O -1.08190800,-1.71085400,-1.84434700  
H 6.24756000,-2.04611800,-0.42346200  
H 5.43266800,-3.43295000,0.32514500  
H 4.86856200,-2.81378500,-1.23828400  
H 2.23317400,-1.59119800,1.15996100

H 3.07784900,-3.13364900,1.37947700  
H 2.54096700,-2.64312800,-0.23915600  
H 5.12420700,-2.06455200,2.43712500  
H 5.85930500,-0.62813500,1.69503100  
H 4.23201800,-0.53973500,2.40517400  
H 1.10433800,-0.81766400,-1.02270100  
H 1.03553000,0.56200000,-2.13365900  
H 2.92099700,2.70690200,1.55851400  
H 4.27722500,1.59597000,1.83255600  
H 4.34245100,2.72998000,0.48965300  
H -1.85698600,2.02837300,-0.25346800  
H -0.62451400,2.43946900,-1.45514900  
H 1.21551300,4.22335100,1.17591700  
H -0.21665200,4.55842000,0.19576100  
H 1.23090800,3.89469500,-0.56930700  
H -0.57911600,1.05721600,2.07020300  
H 0.45096500,2.46216000,2.70902200  
H -4.29800600,0.78740300,-1.60997000  
H -6.22118700,0.54265100,-0.04465100  
H -3.90504300,-2.15722400,2.36731500  
H -1.99116400,-1.91224000,0.80784300  
H -6.06033400,-0.85599800,3.26040300  
H -7.16612500,-0.27757100,2.00195400  
H -6.79241700,-2.00144900,2.13641400

### INT3'

Opt @ B3LYP/6-311+G(d,p) in dichloroethane (SMD model)

SCF Done: E(RB3LYP) = -1742.658304a.u.

Zero-point correction = 0.436015Hartree/Particle

Sum of electronic and thermal Free Energies = -1742.28409a.u.

-----  
C 4.52732800,-1.48775400,0.42741400  
C 4.82398600,-2.67453800,-0.50613900  
C 3.48489800,-1.88702300,1.47694400  
S 3.83558300,-0.17545100,-0.74602200  
C 5.83473600,-1.01846000,1.08432600  
C 0.79125500,0.18676000,-1.04689800  
C 1.54164400,1.09882700,-0.09675000  
C 2.84291600,0.96828800,0.22691200  
C 3.56828000,1.82613700,1.23498700  
C -0.76188400,1.80866100,-0.32243700  
C 0.55582000,2.16978000,0.44598000  
C 0.96091700,3.61247600,0.07934700  
C 0.35290900,2.01844900,1.92439300

N -0.61168400,0.37570200,-0.60496400  
C -3.16471400,-0.48681400,-0.46146000  
C -4.29040400,0.31707600,-0.62790000  
C -5.36574800,0.16938500,0.25001800  
C -5.33185200,-0.77249700,1.28471400  
C -4.18539800,-1.57286500,1.42462200  
C -3.10512200,-1.44023900,0.55934400  
C -6.50451700,-0.94595500,2.22025900  
S -1.78974100,-0.33292100,-1.60089900  
O -2.20054700,0.58722200,-2.67346800  
O -1.27996900,-1.66890300,-1.92580300  
H 5.52025300,-2.39246400,-1.30415500  
H 5.28712000,-3.48646800,0.06902200  
H 3.90964200,-3.05732700,-0.96944400  
H 3.21610900,-1.04986500,2.12876200  
H 3.89011600,-2.68734900,2.11032900  
H 2.56924100,-2.25773300,1.00538900  
H 6.27427600,-1.84192400,1.66370600  
H 6.56352800,-0.70657700,0.32967500  
H 5.67817900,-0.18005100,1.76837700  
H 1.08180200,-0.85948400,-0.96567700  
H 0.93060600,0.49452900,-2.09652700  
H 2.87588300,2.43181300,1.82465100  
H 4.13109200,1.20522700,1.93915300  
H 4.29422900,2.48448900,0.74220300  
H -1.65813800,1.99386900,0.27567700  
H -0.83168500,2.39323400,-1.25228100  
H 1.86245500,3.93105700,0.60873800  
H 0.15431200,4.30745500,0.34446000  
H 1.14864700,3.70560100,-0.99507000  
H 0.10012800,1.04837300,2.33939900  
H 0.32080900,2.88592500,2.57710500  
H -4.32014200,1.03775500,-1.43812100  
H -6.24599300,0.79480500,0.12403600  
H -4.14372200,-2.31231700,2.22093400  
H -2.22652100,-2.06812600,0.66410800  
H -7.22466500,-0.12867500,2.11707800  
H -7.03607300,-1.88424500,2.01573900  
H -6.17934400,-0.98222200,3.26633500

### TS3'

Opt @ B3LYP/6-311+G(d,p) in dichloroethane (SMD model)

SCF Done: E(RB3LYP) = -1742.64096a.u.

Zero-point correction = 0.437086Hartree/Particle

Sum of electronic and thermal Free Energies = -1742.264673a.u.

-----

C -5.19016600,-1.34425800,-0.34568400  
C -4.99057900,-2.69989300,0.32579500  
C -5.07201100,-1.41622500,-1.86363500  
S -3.80168600,-0.04878300,0.39708200  
C -6.50208800,-0.69577800,0.08685100  
C 0.02953800,2.03206800,0.51761900  
C -1.28710300,1.27696100,0.58957000  
C -2.52563600,1.70852100,0.72757500  
C -3.18378300,3.01153100,0.97310000  
C 0.22313300,-0.14143200,-0.55787600  
C -1.04116000,-0.20883200,0.32528000  
C -2.28044300,-0.76439200,-0.38800900  
C -0.75019500,-0.96941800,1.63598600  
N 0.97571400,0.97280400,0.06250600  
C 3.54922400,0.22200400,-0.29137600  
C 3.97539500,-0.68360100,-1.26055800  
C 4.90754700,-1.66289100,-0.91212700  
C 5.42182300,-1.74389000,0.38693400  
C 4.97832300,-0.81313200,1.34173100  
C 4.05023200,0.16848800,1.01283900  
C 6.44492200,-2.79099700,0.75756700  
S 2.37100600,1.50145500,-0.72710600  
O 2.19819300,1.46120100,-2.18760700  
O 2.75051100,2.75098600,-0.05848100  
H -5.03693400,-2.61597800,1.41621500  
H -5.78319700,-3.39437300,0.00641700  
H -4.03384200,-3.16134000,0.05788800  
H -5.15284900,-0.42279000,-2.31743000  
H -5.88167900,-2.03939300,-2.27246400  
H -4.12639200,-1.86546900,-2.18523800  
H -7.35050300,-1.32311400,-0.22054500  
H -6.55119500,-0.57837700,1.17535100  
H -6.62994200,0.29134300,-0.37026300  
H 0.37023800,2.42768300,1.47936100  
H -0.03223500,2.87217900,-0.18594600  
H -2.45476400,3.83245200,1.02862900  
H -3.90165200,3.24605700,0.17722900  
H -3.74496800,2.99955300,1.91687700  
H 0.82645400,-1.05445500,-0.52682900  
H -0.03239600,0.07928500,-1.60374200  
H -2.32745200,-1.85431600,-0.31983000  
H -2.27258300,-0.47724600,-1.44440800  
H 0.11655100,-0.54059700,2.14824300

H -0.53364000,-2.02555000,1.42961100  
H 3.58697800,-0.61071200,-2.27075800  
H 5.24252800,-2.37141400,-1.66558300  
H 5.37087200,-0.85830400,2.35490400  
H 3.72017500,0.89243900,1.75060300  
H 7.43119400,-2.33808400,0.92113800  
H 6.17056000,-3.30691800,1.68498900  
H 6.55252800,-3.54340300,-0.02952700  
H -1.61244100,-0.91803000,2.30717000

#### INT4

Opt @ B3LYP/6-311+G(d,p) in dichloroethane (SMD model)

SCF Done: E(RB3LYP) = -1742.675333a.u.

Zero-point correction = 0.435536Hartree/Particle

Sum of electronic and thermal Free Energies = -1742.310505a.u.

-----  
C 4.80911900,-2.88123900,0.18270400  
C 4.53690400,-3.15161300,-1.26622200  
C 4.33200500,-3.87339900,1.19972200  
S 3.74013700,1.56064900,-0.04179300  
C 5.95263900,-1.97989900,0.53842800  
C -0.24133200,2.42336800,-0.53322800  
C 1.19063200,1.96284300,-0.45920500  
C 2.35297000,2.62300300,-0.47021200  
C 2.60822900,4.07004400,-0.76129200  
C -0.04260500,0.30326100,0.67501100  
C 1.25422100,0.47632200,-0.14323400  
C 2.57459500,0.27684700,0.62553400  
C 1.21495400,-0.37287500,-1.43142000  
N -0.97230600,1.21780700,-0.03147700  
C -3.36831900,-0.01239700,0.23276600  
C -3.64719900,-0.95959200,1.21589400  
C -4.35001600,-2.11416700,0.86667700  
C -4.78209700,-2.32983800,-0.44701000  
C -4.49197100,-1.35425600,-1.41572900  
C -3.79234500,-0.19865200,-1.08637100  
C -5.56234100,-3.56836000,-0.81811500  
S -2.48486800,1.48606000,0.66710500  
O -2.38503600,1.52732200,2.13389000  
O -3.06180300,2.61431700,-0.07239200  
H 4.63907500,-2.24506300,-1.87550200  
H 5.24329300,-3.89273800,-1.68661800  
H 3.53044400,-3.55980700,-1.42382100  
H 4.30563700,-3.44294300,2.20869100



H 4.99446800,-4.75828200,1.25555100  
H 3.32992600,-4.25241800,0.96189600  
H 6.92794000,-2.49358600,0.43916000  
H 5.99715100,-1.10042500,-0.11626500  
H 5.89020100,-1.63125100,1.57679500  
H -0.59409700,2.65424700,-1.54426700  
H -0.41840200,3.31061200,0.08775100  
H 1.66963100,4.60196300,-0.94678500  
H 3.12568000,4.55670300,0.07410800  
H 3.24246100,4.18993100,-1.64908900  
H -0.44450900,-0.71491800,0.65288200  
H 0.10289500,0.60562200,1.72104000  
H 3.01897800,-0.71272700,0.48439800  
H 2.44803000,0.46434200,1.69682100  
H 0.29945000,-0.17703400,-1.99812200  
H 1.24419900,-1.44231100,-1.18874900  
H -3.32535300,-0.78445400,2.23688400  
H -4.56923300,-2.85568400,1.63086100  
H -4.82409100,-1.50309900,-2.44049200  
H -3.58218900,0.55759600,-1.83557600  
H -6.61938000,-3.33004400,-0.99337300  
H -5.17813200,-4.02197900,-1.73886800  
H -5.52054300,-4.32164900,-0.02560500  
H 2.07474600,-0.14210200,-2.06853400

### 1k

Opt @ B3LYP/6-311+G(d,p) in dichloroethane (SMD model)

SCF Done: E(RB3LYP) = -1186.544676a.u.

Zero-point correction = 0.311474Hartree/Particle

Sum of electronic and thermal Free Energies = -1186.286879a.u.

-----  
C -1.51017200,-1.52176600,0.11475800  
C -2.87990100,-1.71334500,-0.36297000  
C -4.00363600,-1.89431900,-0.77165000  
C -5.36846700,-2.11513800,-1.24279900  
C -1.20607900,0.71875200,-0.92900700  
C -1.53209200,2.18770700,-0.76290200  
C -2.71334200,2.53025000,0.10522600  
C -0.84115900,3.10229600,-1.45024800  
N -1.19475600,-0.08485400,0.31584500  
C 1.60411800,-0.10456100,0.58239800  
C 2.24152600,0.92997300,-0.10723500  
C 3.43219600,0.66407600,-0.78149500

C 3.99868500,-0.61839800,-0.77948600  
C 3.34434300,-1.63518300,-0.06880500  
C 2.15311300,-1.38935500,0.61061900  
C 5.27503500,-0.90211400,-1.53495700  
S 0.05398700,0.21806300,1.43263300  
O 0.01023800,1.64874500,1.73128200  
O -0.09279400,-0.79140400,2.48628900  
H -0.80232700,-1.98461600,-0.59430000  
H -1.38110700,-2.01575700,1.08030100  
H -5.39073300,-2.36147400,-2.31113700  
H -5.84476000,-2.93996000,-0.69935100  
H -5.98542900,-1.22105000,-1.09325600  
H -0.27068100,0.59212300,-1.49515700  
H -2.00554000,0.26388500,-1.52679600  
H -2.50125400,2.28597700,1.15066900  
H -2.95567500,3.59511700,0.03845900  
H -3.59916700,1.95089100,-0.18760600  
H -1.10387200,4.15621900,-1.41839700  
H 0.00992600,2.83277700,-2.07171300  
H 1.81784900,1.92876100,-0.09186900  
H 3.93550800,1.47001100,-1.31010400  
H 3.77995100,-2.63093200,-0.03672700  
H 1.66858200,-2.17198100,1.18491600  
H 5.90437700,-0.00941500,-1.60853100  
H 5.85928000,-1.69248900,-1.05257200  
H 5.06000200,-1.23510300,-2.55911700

### TS1

Opt @ B3LYP/6-311+G(d,p) in dichloroethane (SMD model)

SCF Done: E(RB3LYP) = -1742.625787a.u.

Zero-point correction = 0.434160Hartree/Particle

Sum of electronic and thermal Free Energies = -1742.258778a.u.

-----  
C -1.22489600,2.30524200,-1.03095400  
C -0.18546500,3.20887100,-1.52267400  
C 0.67454500,3.94268200,-1.95216800  
C 1.70802500,4.83894200,-2.46389800  
C 0.38010400,0.78584600,0.15464600  
C 1.25017300,0.80731200,1.38589400  
C 1.49654200,2.12961300,2.04512000  
C 1.94230400,-0.33090000,1.74578400  
N -0.82052400,1.64391900,0.23464000  
C -2.73977400,-0.40128800,0.38633800

C -2.23608200,-1.65593700,0.73869200  
C -2.71426000,-2.79002100,0.08400400  
C -3.69216600,-2.69402400,-0.91556100  
C -4.18646000,-1.42312000,-1.24478800  
C -3.72130700,-0.27859600,-0.60153100  
C -4.22866800,-3.93056600,-1.59606900  
S -2.09944100,1.07173100,1.19230800  
O -1.49626600,0.64647100,2.45670000  
O -3.14400700,2.09780500,1.13554600  
H -1.46534100,1.55912900,-1.80719900  
H -2.13789500,2.86644000,-0.81670000  
H 1.59979400,5.84922200,-2.05195900  
H 2.70858800,4.47547200,-2.20142300  
H 1.65886600,4.91532000,-3.55669200  
H 0.12316400,-0.24602500,-0.12782700  
H 0.97037500,1.19809000,-0.67420200  
H 0.58493200,2.48210500,2.54109100  
H 2.29464500,2.06000800,2.78977800  
H 1.76908800,2.89418100,1.30495700  
H 2.50815600,-0.34519900,2.67027400  
H 1.60715800,-1.30014900,1.38759500  
H -1.50036900,-1.73706100,1.53179800  
H -2.32609900,-3.76736300,0.36016500  
H -4.95332700,-1.32929000,-2.00987900  
H -4.13053000,0.69731700,-0.84079100  
H -5.13106200,-4.29673300,-1.08892000  
H -4.50112200,-3.72906800,-2.63729800  
H -3.49619600,-4.74391400,-1.58601100  
S 3.92075700,-0.32722600,0.37027200  
C 3.96759900,-2.02622900,-0.40099600  
C 2.76572500,-2.24413800,-1.33327900  
C 5.27047600,-2.05153700,-1.22498700  
C 4.01904200,-3.11744800,0.67977900  
H 2.84011900,-3.22363800,-1.82630900  
H 1.81838700,-2.22455500,-0.78286900  
H 2.72425200,-1.47168100,-2.10747000  
H 5.37751200,-3.03022100,-1.71322700  
H 6.14728100,-1.89184900,-0.58910300  
H 5.26493100,-1.28154700,-2.00333500  
H 3.11227500,-3.12133200,1.29446300  
H 4.10870900,-4.10936100,0.21484600  
H 4.87573800,-2.97021200,1.34442100

## INT2

Opt @ B3LYP/6-311+G(d,p) in dichloroethane (SMD model)

SCF Done: E(RB3LYP) = -1742.634759a.u.  
Zero-point correction = 0.434863Hartree/Particle  
Sum of electronic and thermal Free Energies = -1742.266615a.u.

-----  
C -2.07726400,2.16289900,-0.47964500  
C -1.53330200,3.41218200,-1.01225800  
C -1.09683400,4.43980800,-1.47714100  
C -0.57336000,5.68791600,-2.02619800  
C 0.17406600,1.02532500,-0.27273900  
C 1.37676900,1.23652600,0.59618100  
C 1.69329200,2.60696400,1.10519300  
C 2.33655800,0.12503100,0.80935600  
N -1.09736800,1.45447100,0.37714500  
C -2.46693700,-0.98497000,0.56293200  
C -1.69327500,-2.11979600,0.30627900  
C -2.23466300,-3.15899500,-0.44857800  
C -3.54001100,-3.08681600,-0.95403900  
C -4.30216400,-1.94482900,-0.66779300  
C -3.77760300,-0.89646500,0.08489000  
C -4.10828600,-4.20488000,-1.79487300  
S -1.76729900,0.38186900,1.50103500  
O -0.64452100,-0.15412400,2.27394400  
O -2.88291900,1.08816800,2.13661800  
H -2.41484300,1.52227700,-1.31177200  
H -2.94794100,2.37802200,0.14603600  
H -1.06686500,6.55808900,-1.57723700  
H 0.50228900,5.78003100,-1.83430300  
H -0.72293300,5.73994100,-3.11127500  
H 0.11180100,-0.01640100,-0.61723100  
H 0.24219800,1.64847500,-1.17514800  
H 0.87156200,3.30360600,0.91669300  
H 1.88256600,2.59544300,2.18828200  
H 2.60366800,3.01201000,0.63341100  
H 2.94229200,0.29842500,1.70358500  
H -1.06686500,6.55808900,-1.57723700  
H 0.50228900,5.78003100,-1.83430300  
H -0.72293300,5.73994100,-3.11127500  
H 0.11180100,-0.01640100,-0.61723100  
H 0.24219800,1.64847500,-1.17514800  
H 0.87156200,3.30360600,0.91669300  
H 1.88256600,2.59544300,2.18828200  
H 2.60366800,3.01201000,0.63341100  
H 2.94229200,0.29842500,1.70358500  
H 1.81366300,-0.83019800,0.91691200  
H -0.69477400,-2.19687400,0.72236300

H -1.63554300,-4.04604600,-0.63926100  
H -5.32565900,-1.88041500,-1.02919700  
H -4.38566200,-0.03205800,0.32997000  
H -3.65234500,-5.16771700,-1.54299700  
H -5.19139700,-4.29538200,-1.66272700  
H -3.92432400,-4.02597200,-2.86262300  
S 3.49059000,-0.00175900,-0.66819900  
C 4.58259700,-1.47585100,-0.28260900  
C 3.74960400,-2.76183200,-0.18139000  
C 5.53906400,-1.56216500,-1.48366200  
C 5.37950200,-1.24131100,1.00863200  
H 4.40991400,-3.62442700,-0.01819100  
H 3.04675300,-2.72677500,0.65801500  
H 3.17993200,-2.93528600,-1.09992700  
H 6.22523300,-2.40824400,-1.34917300  
H 6.13894000,-0.65107800,-1.58151000  
H 4.99133700,-1.71545000,-2.41981200  
H 4.72505200,-1.16593800,1.88354700  
H 6.06427500,-2.08218000,1.18389600  
H 5.97272600,-0.32374000,0.94456900

## TS2

Opt @ B3LYP/6-311+G(d,p) in dichloroethane (SMD model)

SCF Done: E(RB3LYP) = -1742.617553a.u.

Zero-point correction = 0.435031Hartree/Particle

Sum of electronic and thermal Free Energies = -1742.245509a.u.

-----  
C 0.15555500,-0.32816100,-1.01077900  
C -1.28879600,-0.64065400,-0.69281800  
C -0.73722900,-1.61201600,1.25953800  
C 0.72847200,-1.52491200,1.02945900  
C -2.14864200,0.57608700,-0.46322200  
C -1.64330200,-1.99861500,2.00628300  
C -2.83660500,-2.38807200,2.74606800  
S -3.71318100,0.23923500,0.46698700  
C -4.92288500,1.47606900,-0.24871100  
C -6.18457600,1.30310500,0.61390600  
C -4.38777800,2.90911900,-0.11167200  
C -5.24742600,1.15004200,-1.71402300  
C -1.88957600,-1.79390700,-1.45182800  
N 0.99550000,-1.37911800,-0.41003800  
C 3.44906900,-0.03445300,-0.28623400  
C 4.05005900,-0.06860500,0.97482400  
C 4.67663100,1.07657800,1.46283400  
C 4.71282200,2.26068700,0.71291100

C 4.11301700,2.26488600,-0.55460700  
C 3.48188000,1.12946100,-1.05879500  
C 5.37011200,3.50438200,1.26201900  
S 2.60185400,-1.49308200,-0.90868500  
O 3.16063000,-2.65347900,-0.21109400  
O 2.57965700,-1.39622900,-2.36971900  
H 0.34315300,-0.33680000,-2.09105100  
H 0.43168900,0.66593600,-0.62001500  
H 1.22413300,-2.43234500,1.37988700  
H 1.13530400,-0.66813300,1.59588200  
H -2.44435200,0.99970400,-1.43598300  
H -1.58259400,1.34756200,0.06856700

### INT3

Opt @ B3LYP/6-311+G(d,p) in dichloroethane (SMD model)

SCF Done: E(RB3LYP) = -1742.654178a.u.

Zero-point correction = 0.438220Hartree/Particle

Sum of electronic and thermal Free Energies = -1742.27581a.u.

-----  
C 0.06289700,0.62705300,1.06110000  
C -1.28010700,0.95478800,0.35884200  
C -0.81188200,1.25544700,-1.07929600  
C 0.68837600,1.58064700,-1.05582300  
C -2.21408200,-0.26737200,0.45774000  
C -1.56676800,1.23047200,-2.15169400  
C -1.53062900,1.44090700,-3.60640000  
S -3.81863400,-0.04075200,-0.42008500  
C -4.92306900,-1.32265100,0.39139900  
C -6.22173700,-1.26406700,-0.42995300  
C -4.30341600,-2.72395300,0.29557000  
C -5.21432100,-0.95143600,1.85276900  
C -1.90173300,2.21526700,0.99514100  
N 1.01078700,1.52050300,0.38019700  
C 3.34951400,-0.00005800,0.35913600  
C 3.95376600,-0.10989400,-0.89469500  
C 4.48516000,-1.33750600,-1.29110600  
C 4.42415100,-2.45923600,-0.45491900  
C 3.81942400,-2.32011600,0.80436400  
C 3.28383200,-1.10330500,1.21689100  
C 5.00408200,-3.78616500,-0.88359800  
S 2.61618500,1.56212900,0.86120200  
O 3.24598900,2.61603900,0.06288700  
O 2.59981400,1.58732300,2.32532800  
H 0.05238400,0.84499400,2.13049600  
H 0.32661800,-0.43394200,0.91405500

H 0.92789100,2.57295700,-1.44571100  
H 1.25312100,0.83485500,-1.63854000  
H -2.42297800,-0.45874200,1.51640600  
H -1.70429700,-1.14443000,0.04599100  
H -2.20728300,2.25033300,-3.90898800  
H -0.51935300,1.70676200,-3.95875100  
H -1.84315500,0.53846000,-4.14704100  
H -6.95172100,-1.97193700,-0.01781500  
H -6.66773300,-0.26386400,-0.40001000  
H -6.04311300,-1.52950700,-1.47723700  
H -4.99888600,-3.46857500,0.70554100  
H -3.37147800,-2.79817600,0.86620500  
H -4.09035000,-2.99088800,-0.74455500  
H -5.67384700,0.03914300,1.92305500  
H -5.90404700,-1.68362600,2.29409000  
H -4.30704200,-0.95066600,2.46661100  
H -2.21813400,2.00979200,2.02572400  
H -1.16944800,3.02817100,1.01843300  
H -2.77514000,2.54584300,0.42841900  
H 4.03107900,0.76341100,-1.53360500  
H 4.96363700,-1.42133400,-2.26371600  
H 3.77705400,-3.17543300,1.47486100  
H 2.84521700,-0.99352100,2.20310400  
H 5.43427500,-3.73026600,-1.88795400  
H 5.79488900,-4.11366300,-0.19770000  
H 4.23835200,-4.57154600,-0.88915000

### TS3

Opt @ B3LYP/6-311+G(d,p) in dichloroethane (SMD model)

SCF Done: E(RB3LYP) = -1742.643258a.u.

Zero-point correction = 0.437378Hartree/Particle

Sum of electronic and thermal Free Energies = -1742.265442a.u.

-----  
C 0.15013800,-1.04075600,-1.07765700  
C -1.23828900,-1.16980700,-0.41122500  
C -0.88937100,-0.89588400,1.05263200  
C 0.54823500,-1.31425200,1.31517000  
C -2.25156500,-0.10672400,-0.85453000  
C -1.76919500,-0.28541500,1.82194300  
C -1.83338300,0.15699600,3.23302700  
S -3.47294500,0.17736300,0.51251300  
C -4.92353300,1.14375900,-0.54348600  
C -5.87556700,1.60276200,0.55738700  
C -4.31898200,2.32550100,-1.29295200  
C -5.59204300,0.13588200,-1.47392500

C -1.79277500,-2.59826600,-0.59297900  
N 1.03726200,-1.62042700,-0.04941700  
C 3.35153900,-0.08330400,-0.22645200  
C 3.82825900,0.39872800,0.99536000  
C 4.31101000,1.70414900,1.07240800  
C 4.32530700,2.54118900,-0.05193400  
C 3.85422800,2.02889600,-1.26955400  
C 3.36822400,0.72666600,-1.36556000  
C 4.82474200,3.96292400,0.04711400  
S 2.68004300,-1.74757800,-0.32705700  
O 3.22254200,-2.50358500,0.80418700  
O 2.82571400,-2.19409600,-1.71447200  
H 0.25219100,-1.60631600,-2.00571700  
H 0.38892700,0.01733900,-1.27298100  
H 0.64754800,-2.20509400,1.94294100  
H 1.11579200,-0.49960100,1.78915600  
H -2.79228600,-0.41938100,-1.75140900  
H -1.74408500,0.84108100,-1.06222300  
H -2.63872800,-0.35918900,3.77214500  
H -0.89355800,-0.04365900,3.76717200  
H -2.04194100,1.23210400,3.30031300  
H -6.74264500,2.11308200,0.11519900  
H -6.25015600,0.75497100,1.14208500  
H -5.38648700,2.30269800,1.24343500  
H -5.11582800,2.90258700,-1.78585600  
H -3.62125900,2.00741400,-2.07492400  
H -3.78923100,3.00053400,-0.61232000  
H -5.98145600,-0.72306200,-0.91839000  
H -6.43700600,0.61298900,-1.99433200  
H -4.90964100,-0.23616600,-2.24582000  
H -2.00131500,-2.79883000,-1.65152800  
H -1.06927800,-3.34206500,-0.24554200  
H -2.72064500,-2.72268600,-0.02705700  
H 3.84964000,-0.25603400,1.86003400  
H 4.69385000,2.07516200,2.02012700  
H 3.87940500,2.65487600,-2.15837600  
H 3.03605000,0.32558200,-2.31732000  
H 4.00246800,4.65398500,0.27600200  
H 5.57116200,4.07144600,0.84057100  
H 5.27618500,4.29584200,-0.89321600



## X-Ray structures

### Compound 3e

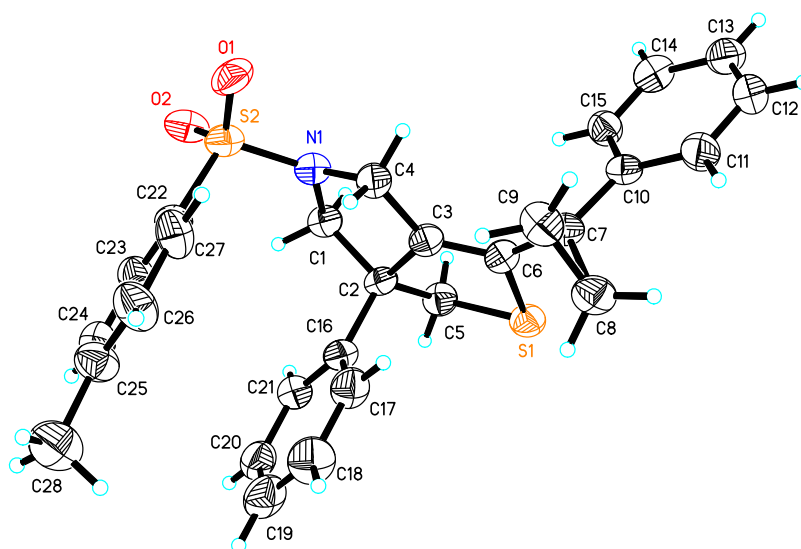

The crystal data of **3e** have been deposited in CCDC with number 2222581. Empirical Formula:  $C_{28}H_{27}NO_2S_2$ ; Formula Weight: 473.62; Crystal Color, Habit: colorless, Crystal Dimensions: 0.200 x 0.140 x 0.080 mm<sup>3</sup>; Crystal System: Orthorhombic; Lattice Parameters:  $a = 12.067(2)$  Å,  $b = 10.6363(17)$  Å,  $c = 37.466(5)$  Å,  $\alpha = 90^\circ$ ,  $\beta = 90^\circ$ ,  $\gamma = 90^\circ$ ,  $V = 4808.6(14)$  Å<sup>3</sup>; Space group:  $Pbc_2a$ ;  $Z = 8$ ;  $D_{calc} = 1.308$  g/cm<sup>3</sup>;  $F_{000} = 2000$ ; Final R indices [ $I > 2\sigma(I)$ ]  $R1 = 0.0797$ ,  $wR2 = 0.2101$ .

## 12. References

- [1] K. H. Rui, S. Yang, Y. Wei, M. Shi, *Org. Chem. Front.*, **2019**, *6*, 2506-2513.
- [2] J. X. Liu, Y. Wei, M. Shi, *Org. Chem. Front.*, **2021**, *8*, 94-100.
- [3] X. Y. Zhang, X. Y. Wu, B. Zhang, Y. Wei, M. Shi, *ACS Catal.*, **2021**, *8*, 4372-4380.
- [4] F. Schröder, C. Tugny, E. Salanouve, H. Clavier, L. Giordano, D. Moraleda, Y. Gimbert, V. M. Mansuy, J. P. Goddard, L. Fensterbank, *Organometallics*, **2014**, *33*, 4051-4056.
- [5] H. M. Oh, J. E. Park, J. Kim, J. H. Kim, Y. K. Kang, Y. K. Chung, *Chem. Eur. J.*, **2014**, *20*, 9024-9036.
- [6] F. Hou, Y. T. Ning, L. L. Song, Z. Q. Tan, J. W. Yang, Z. G. Liu, F. Chen, *Org. Lett.*, **2023**, *25*, 7810-7815.
- [7] R. M. P. Ylagan, E. J. Lee, D. E. Negru, P. Ricci, B. Park, H. Ryu, M. H. Baik, P. A. Evans, *Angew. Chem.Int. Ed.*, **2023**, *62*, e2023002.
- [8] T. Shibata, Y. Kobayashi, S. Maekawa, N. Toshida, K. Takagi, *Tetrahedron*, **2005**, *61*, 9018-9024.
